# Supplementary material for: In-silico target prediction by ensemble chemogenomic model based on multi-scale information of chemical structures and protein sequences
Source: J Cheminform. 2023 Apr 23;15:48. doi: 10.1186/s13321-023-00720-0 (PMC10123967; doi:10.1186/s13321-023-00720-0)
Supplement: Supplementary file 5 — Additional file 5. Results and performance of our model and alternative state-of-the-art target prediction tools on the validation data from SwissTargetPrediction. [file 13321_2023_720_MOESM5_ESM.xlsx]

## Sheet: swiss validation datasets
compound	targets
CHEMBL1076903	CHEMBL1907589
CHEMBL1076903	CHEMBL2109236
CHEMBL3218576	CHEMBL4005
CHEMBL3218576	CHEMBL3130
CHEMBL3883491	CHEMBL2326
CHEMBL3883491	CHEMBL3729
CHEMBL3884217	CHEMBL2326
CHEMBL3884217	CHEMBL205
CHEMBL3885230	CHEMBL3729
CHEMBL3885230	CHEMBL2326
CHEMBL3885230	CHEMBL205
CHEMBL3889835	CHEMBL2014
CHEMBL3889835	CHEMBL233
CHEMBL3889936	CHEMBL280
CHEMBL3889936	CHEMBL4270
CHEMBL3889937	CHEMBL2971
CHEMBL3889937	CHEMBL2835
CHEMBL3890156	CHEMBL209
CHEMBL3890156	CHEMBL209
CHEMBL3890208	CHEMBL2971
CHEMBL3890208	CHEMBL2148
CHEMBL3890487	CHEMBL2971
CHEMBL3890487	CHEMBL2835
CHEMBL3890530	CHEMBL2147
CHEMBL3890530	CHEMBL4523
CHEMBL3890537	CHEMBL2835
CHEMBL3890537	CHEMBL2971
CHEMBL3890701	CHEMBL2835
CHEMBL3890701	CHEMBL2971
CHEMBL3890701	CHEMBL2148
CHEMBL3890745	CHEMBL2147
CHEMBL3890745	CHEMBL5407
CHEMBL3890953	CHEMBL5407
CHEMBL3890953	CHEMBL2147
CHEMBL3890962	CHEMBL4070
CHEMBL3890962	CHEMBL3629
CHEMBL3891057	CHEMBL2835
CHEMBL3891057	CHEMBL2971
CHEMBL3891120	CHEMBL2095194
CHEMBL3891120	CHEMBL3991
CHEMBL3891137	CHEMBL2835
CHEMBL3891137	CHEMBL2971
CHEMBL3891172	CHEMBL2835
CHEMBL3891172	CHEMBL2971
CHEMBL3891228	CHEMBL209
CHEMBL3891228	CHEMBL1741195
CHEMBL3891615	CHEMBL2835
CHEMBL3891615	CHEMBL2971
CHEMBL3891851	CHEMBL5407
CHEMBL3891851	CHEMBL2147
CHEMBL3891851	CHEMBL4523
CHEMBL3892099	CHEMBL299
CHEMBL3892099	CHEMBL3920
CHEMBL3892509	CHEMBL5407
CHEMBL3892509	CHEMBL2147
CHEMBL3892526	CHEMBL2971
CHEMBL3892526	CHEMBL2835
CHEMBL3892536	CHEMBL5407
CHEMBL3892536	CHEMBL2147
CHEMBL3892885	CHEMBL5407
CHEMBL3892885	CHEMBL2147
CHEMBL3892885	CHEMBL4523
CHEMBL3893327	CHEMBL2971
CHEMBL3893327	CHEMBL2148
CHEMBL3893449	CHEMBL2835
CHEMBL3893449	CHEMBL2971
CHEMBL3893643	CHEMBL237
CHEMBL3893643	CHEMBL233
CHEMBL3893713	CHEMBL2971
CHEMBL3893713	CHEMBL2835
CHEMBL3894557	CHEMBL3638334
CHEMBL3894557	CHEMBL233
CHEMBL3894571	CHEMBL2292
CHEMBL3894571	CHEMBL5543
CHEMBL3894688	CHEMBL2971
CHEMBL3894688	CHEMBL2835
CHEMBL3895094	CHEMBL5407
CHEMBL3895094	CHEMBL2147
CHEMBL3895124	CHEMBL2147
CHEMBL3895124	CHEMBL4523
CHEMBL3895272	CHEMBL2835
CHEMBL3895272	CHEMBL2971
CHEMBL3895531	CHEMBL5407
CHEMBL3895531	CHEMBL2147
CHEMBL3895540	CHEMBL234
CHEMBL3895540	CHEMBL217
CHEMBL3895925	CHEMBL2835
CHEMBL3895925	CHEMBL2971
CHEMBL3895998	CHEMBL262
CHEMBL3895998	CHEMBL299
CHEMBL3895998	CHEMBL3920
CHEMBL3896005	CHEMBL2971
CHEMBL3896005	CHEMBL2835
CHEMBL3896124	CHEMBL2147
CHEMBL3896124	CHEMBL4523
CHEMBL3896141	CHEMBL2835
CHEMBL3896141	CHEMBL2971
CHEMBL3896244	CHEMBL2147
CHEMBL3896244	CHEMBL4523
CHEMBL3896312	CHEMBL5407
CHEMBL3896312	CHEMBL2147
CHEMBL3896312	CHEMBL4523
CHEMBL3896379	CHEMBL2971
CHEMBL3896379	CHEMBL2835
CHEMBL3896662	CHEMBL2835
CHEMBL3896662	CHEMBL2971
CHEMBL3896759	CHEMBL2835
CHEMBL3896759	CHEMBL2971
CHEMBL3896782	CHEMBL2147
CHEMBL3896782	CHEMBL4523
CHEMBL3896791	CHEMBL209
CHEMBL3896791	CHEMBL1741195
CHEMBL3896877	CHEMBL233
CHEMBL3896877	CHEMBL237
CHEMBL3896937	CHEMBL234
CHEMBL3896937	CHEMBL224
CHEMBL3896937	CHEMBL217
CHEMBL3897068	CHEMBL237
CHEMBL3897068	CHEMBL233
CHEMBL3897108	CHEMBL1741195
CHEMBL3897108	CHEMBL209
CHEMBL3897112	CHEMBL2971
CHEMBL3897112	CHEMBL2835
CHEMBL3897323	CHEMBL2147
CHEMBL3897323	CHEMBL4523
CHEMBL3897417	CHEMBL2835
CHEMBL3897417	CHEMBL2971
CHEMBL3897417	CHEMBL2148
CHEMBL3897606	CHEMBL2147
CHEMBL3897606	CHEMBL4523
CHEMBL3897912	CHEMBL5407
CHEMBL3897912	CHEMBL2147
CHEMBL3897912	CHEMBL4523
CHEMBL3897967	CHEMBL237
CHEMBL3897967	CHEMBL233
CHEMBL3897993	CHEMBL2971
CHEMBL3897993	CHEMBL2835
CHEMBL3898231	CHEMBL2835
CHEMBL3898231	CHEMBL2971
CHEMBL3898371	CHEMBL2095194
CHEMBL3898371	CHEMBL3991
CHEMBL3898989	CHEMBL5407
CHEMBL3898989	CHEMBL2147
CHEMBL3898989	CHEMBL4523
CHEMBL3899109	CHEMBL2835
CHEMBL3899109	CHEMBL2971
CHEMBL3899281	CHEMBL2835
CHEMBL3899281	CHEMBL2971
CHEMBL3899672	CHEMBL2835
CHEMBL3899672	CHEMBL2971
CHEMBL3899672	CHEMBL2148
CHEMBL3899762	CHEMBL2971
CHEMBL3899762	CHEMBL2835
CHEMBL3900004	CHEMBL2835
CHEMBL3900004	CHEMBL2971
CHEMBL3900248	CHEMBL1741195
CHEMBL3900248	CHEMBL209
CHEMBL3900258	CHEMBL5407
CHEMBL3900258	CHEMBL2147
CHEMBL3900425	CHEMBL2147
CHEMBL3900425	CHEMBL5407
CHEMBL3900425	CHEMBL4523
CHEMBL3900752	CHEMBL224
CHEMBL3900752	CHEMBL217
CHEMBL3900795	CHEMBL2147
CHEMBL3900795	CHEMBL4523
CHEMBL3901124	CHEMBL2835
CHEMBL3901124	CHEMBL2971
CHEMBL3901124	CHEMBL2148
CHEMBL3901134	CHEMBL2971
CHEMBL3901134	CHEMBL2835
CHEMBL3901391	CHEMBL2095194
CHEMBL3901391	CHEMBL3991
CHEMBL3901481	CHEMBL5407
CHEMBL3901481	CHEMBL2147
CHEMBL3901497	CHEMBL2835
CHEMBL3901497	CHEMBL2971
CHEMBL3901827	CHEMBL4630
CHEMBL3901827	CHEMBL3038469
CHEMBL3902417	CHEMBL5407
CHEMBL3902417	CHEMBL2147
CHEMBL3902498	CHEMBL2095194
CHEMBL3902498	CHEMBL3991
CHEMBL3902542	CHEMBL2971
CHEMBL3902542	CHEMBL2148
CHEMBL3902579	CHEMBL2835
CHEMBL3902579	CHEMBL2971
CHEMBL3903218	CHEMBL2971
CHEMBL3903218	CHEMBL2835
CHEMBL3903272	CHEMBL4860
CHEMBL3903272	CHEMBL4625
CHEMBL3903274	CHEMBL1906
CHEMBL3903274	CHEMBL5145
CHEMBL3903286	CHEMBL2971
CHEMBL3903286	CHEMBL2148
CHEMBL3903560	CHEMBL224
CHEMBL3903560	CHEMBL234
CHEMBL3903686	CHEMBL4523
CHEMBL3903686	CHEMBL2147
CHEMBL3903720	CHEMBL2835
CHEMBL3903720	CHEMBL2971
CHEMBL3903777	CHEMBL1741195
CHEMBL3903777	CHEMBL209
CHEMBL3903837	CHEMBL4523
CHEMBL3903837	CHEMBL2147
CHEMBL3904282	CHEMBL4523
CHEMBL3904282	CHEMBL2147
CHEMBL3904335	CHEMBL2971
CHEMBL3904335	CHEMBL2835
CHEMBL3904982	CHEMBL2835
CHEMBL3904982	CHEMBL2971
CHEMBL3905144	CHEMBL4523
CHEMBL3905144	CHEMBL2147
CHEMBL3905150	CHEMBL2835
CHEMBL3905150	CHEMBL2148
CHEMBL3905194	CHEMBL2147
CHEMBL3905194	CHEMBL4523
CHEMBL3905247	CHEMBL234
CHEMBL3905247	CHEMBL217
CHEMBL3905247	CHEMBL224
CHEMBL3905788	CHEMBL2835
CHEMBL3905788	CHEMBL2971
CHEMBL3906087	CHEMBL2835
CHEMBL3906087	CHEMBL2971
CHEMBL3906168	CHEMBL2835
CHEMBL3906168	CHEMBL2971
CHEMBL3906357	CHEMBL2147
CHEMBL3906357	CHEMBL4523
CHEMBL3906421	CHEMBL5407
CHEMBL3906421	CHEMBL2147
CHEMBL3906798	CHEMBL5407
CHEMBL3906798	CHEMBL2147
CHEMBL3906798	CHEMBL4523
CHEMBL3906885	CHEMBL2971
CHEMBL3906885	CHEMBL2148
CHEMBL3906961	CHEMBL2971
CHEMBL3906961	CHEMBL2835
CHEMBL3907010	CHEMBL5366
CHEMBL3907010	CHEMBL3105
CHEMBL3907015	CHEMBL1906
CHEMBL3907015	CHEMBL5145
CHEMBL3907088	CHEMBL3920
CHEMBL3907088	CHEMBL299
CHEMBL3907320	CHEMBL5407
CHEMBL3907320	CHEMBL2147
CHEMBL3907536	CHEMBL209
CHEMBL3907536	CHEMBL1741195
CHEMBL3907732	CHEMBL2147
CHEMBL3907732	CHEMBL4523
CHEMBL3908233	CHEMBL2835
CHEMBL3908233	CHEMBL2971
CHEMBL3908328	CHEMBL2835
CHEMBL3908328	CHEMBL2971
CHEMBL3908409	CHEMBL2835
CHEMBL3908409	CHEMBL2971
CHEMBL3909091	CHEMBL2971
CHEMBL3909091	CHEMBL2835
CHEMBL3909092	CHEMBL2835
CHEMBL3909092	CHEMBL2971
CHEMBL3909280	CHEMBL2147
CHEMBL3909280	CHEMBL5407
CHEMBL3909280	CHEMBL4523
CHEMBL3909510	CHEMBL2835
CHEMBL3909510	CHEMBL2971
CHEMBL3909519	CHEMBL2835
CHEMBL3909519	CHEMBL2971
CHEMBL3909568	CHEMBL2971
CHEMBL3909568	CHEMBL2835
CHEMBL3909785	CHEMBL2147
CHEMBL3909785	CHEMBL4523
CHEMBL3909947	CHEMBL5407
CHEMBL3909947	CHEMBL2147
CHEMBL3910228	CHEMBL2525
CHEMBL3910228	CHEMBL4822
CHEMBL3911037	CHEMBL1945
CHEMBL3911037	CHEMBL1946
CHEMBL3911166	CHEMBL2835
CHEMBL3911166	CHEMBL2971
CHEMBL3911942	CHEMBL2835
CHEMBL3911942	CHEMBL2971
CHEMBL3912892	CHEMBL2971
CHEMBL3912892	CHEMBL2835
CHEMBL3912919	CHEMBL2835
CHEMBL3912919	CHEMBL2971
CHEMBL3913446	CHEMBL4523
CHEMBL3913446	CHEMBL2147
CHEMBL3913540	CHEMBL2147
CHEMBL3913540	CHEMBL4523
CHEMBL3913691	CHEMBL234
CHEMBL3913691	CHEMBL224
CHEMBL3913842	CHEMBL2835
CHEMBL3913842	CHEMBL2971
CHEMBL3914162	CHEMBL2835
CHEMBL3914162	CHEMBL2971
CHEMBL3914221	CHEMBL2835
CHEMBL3914221	CHEMBL2971
CHEMBL3914377	CHEMBL2971
CHEMBL3914377	CHEMBL2835
CHEMBL3914438	CHEMBL2835
CHEMBL3914438	CHEMBL2971
CHEMBL3914438	CHEMBL2148
CHEMBL3914475	CHEMBL2835
CHEMBL3914475	CHEMBL2148
CHEMBL3914541	CHEMBL2835
CHEMBL3914541	CHEMBL2971
CHEMBL3914582	CHEMBL4625
CHEMBL3914582	CHEMBL4860
CHEMBL3914623	CHEMBL2835
CHEMBL3914623	CHEMBL2971
CHEMBL3914629	CHEMBL209
CHEMBL3914629	CHEMBL1741195
CHEMBL3914639	CHEMBL5407
CHEMBL3914639	CHEMBL2147
CHEMBL3914639	CHEMBL4523
CHEMBL3915323	CHEMBL5407
CHEMBL3915323	CHEMBL2147
CHEMBL3915560	CHEMBL2835
CHEMBL3915560	CHEMBL2971
CHEMBL3915865	CHEMBL2835
CHEMBL3915865	CHEMBL2971
CHEMBL3915913	CHEMBL5407
CHEMBL3915913	CHEMBL2147
CHEMBL3915926	CHEMBL2835
CHEMBL3915926	CHEMBL2971
CHEMBL3915972	CHEMBL2835
CHEMBL3915972	CHEMBL2971
CHEMBL3916092	CHEMBL4070
CHEMBL3916092	CHEMBL3629
CHEMBL3916122	CHEMBL237
CHEMBL3916122	CHEMBL233
CHEMBL3916604	CHEMBL1741195
CHEMBL3916604	CHEMBL209
CHEMBL3916637	CHEMBL2971
CHEMBL3916637	CHEMBL2835
CHEMBL3916902	CHEMBL2147
CHEMBL3916902	CHEMBL5407
CHEMBL3916925	CHEMBL2835
CHEMBL3916925	CHEMBL2971
CHEMBL3916961	CHEMBL2722
CHEMBL3916961	CHEMBL1908
CHEMBL3917077	CHEMBL5407
CHEMBL3917077	CHEMBL2147
CHEMBL3917434	CHEMBL2095194
CHEMBL3917434	CHEMBL3991
CHEMBL3917854	CHEMBL2971
CHEMBL3917854	CHEMBL2835
CHEMBL3917906	CHEMBL2835
CHEMBL3917906	CHEMBL2971
CHEMBL3917906	CHEMBL2148
CHEMBL3918076	CHEMBL2147
CHEMBL3918076	CHEMBL4523
CHEMBL3918273	CHEMBL4523
CHEMBL3918273	CHEMBL2147
CHEMBL3918538	CHEMBL2835
CHEMBL3918538	CHEMBL2971
CHEMBL3918755	CHEMBL234
CHEMBL3918755	CHEMBL224
CHEMBL3918755	CHEMBL217
CHEMBL3919101	CHEMBL2971
CHEMBL3919101	CHEMBL2835
CHEMBL3919173	CHEMBL3650
CHEMBL3919173	CHEMBL2742
CHEMBL3919205	CHEMBL1906
CHEMBL3919205	CHEMBL5145
CHEMBL3919361	CHEMBL1907601
CHEMBL3919361	CHEMBL301
CHEMBL3919646	CHEMBL2147
CHEMBL3919646	CHEMBL4523
CHEMBL3919799	CHEMBL2971
CHEMBL3919799	CHEMBL2148
CHEMBL3919848	CHEMBL209
CHEMBL3919848	CHEMBL1741195
CHEMBL3920142	CHEMBL2835
CHEMBL3920142	CHEMBL2971
CHEMBL3920252	CHEMBL234
CHEMBL3920252	CHEMBL224
CHEMBL3920252	CHEMBL217
CHEMBL3920292	CHEMBL2835
CHEMBL3920292	CHEMBL2971
CHEMBL3920418	CHEMBL2835
CHEMBL3920418	CHEMBL2971
CHEMBL3920484	CHEMBL2835
CHEMBL3920484	CHEMBL2971
CHEMBL3920484	CHEMBL2148
CHEMBL3920517	CHEMBL299
CHEMBL3920517	CHEMBL3920
CHEMBL3920581	CHEMBL2971
CHEMBL3920581	CHEMBL2148
CHEMBL3920600	CHEMBL2147
CHEMBL3920600	CHEMBL4523
CHEMBL3920627	CHEMBL1741195
CHEMBL3920627	CHEMBL209
CHEMBL3920681	CHEMBL2835
CHEMBL3920681	CHEMBL2148
CHEMBL3920824	CHEMBL2971
CHEMBL3920824	CHEMBL2835
CHEMBL3921320	CHEMBL2971
CHEMBL3921320	CHEMBL2148
CHEMBL3921546	CHEMBL2835
CHEMBL3921546	CHEMBL2971
CHEMBL3921881	CHEMBL2971
CHEMBL3921881	CHEMBL2835
CHEMBL3921976	CHEMBL233
CHEMBL3921976	CHEMBL2014
CHEMBL3922069	CHEMBL2835
CHEMBL3922069	CHEMBL2971
CHEMBL3922782	CHEMBL2835
CHEMBL3922782	CHEMBL2971
CHEMBL3922831	CHEMBL2835
CHEMBL3922831	CHEMBL2971
CHEMBL3923240	CHEMBL224
CHEMBL3923240	CHEMBL214
CHEMBL3923607	CHEMBL4625
CHEMBL3923607	CHEMBL4860
CHEMBL3924226	CHEMBL2971
CHEMBL3924226	CHEMBL2835
CHEMBL3924451	CHEMBL2971
CHEMBL3924451	CHEMBL2835
CHEMBL3924903	CHEMBL5407
CHEMBL3924903	CHEMBL2147
CHEMBL3924903	CHEMBL4523
CHEMBL3925403	CHEMBL2147
CHEMBL3925403	CHEMBL5407
CHEMBL3925605	CHEMBL2971
CHEMBL3925605	CHEMBL2148
CHEMBL3925919	CHEMBL2835
CHEMBL3925919	CHEMBL2971
CHEMBL3925958	CHEMBL2971
CHEMBL3925958	CHEMBL2835
CHEMBL3926007	CHEMBL5407
CHEMBL3926007	CHEMBL2147
CHEMBL3926007	CHEMBL4523
CHEMBL3926009	CHEMBL2971
CHEMBL3926009	CHEMBL2835
CHEMBL3926059	CHEMBL2971
CHEMBL3926059	CHEMBL2148
CHEMBL3926308	CHEMBL2835
CHEMBL3926308	CHEMBL2971
CHEMBL3926620	CHEMBL2147
CHEMBL3926620	CHEMBL4523
CHEMBL3926930	CHEMBL2971
CHEMBL3926930	CHEMBL2148
CHEMBL3927136	CHEMBL237
CHEMBL3927136	CHEMBL233
CHEMBL3927535	CHEMBL2971
CHEMBL3927535	CHEMBL2835
CHEMBL3927952	CHEMBL5407
CHEMBL3927952	CHEMBL2147
CHEMBL3927952	CHEMBL4523
CHEMBL3928129	CHEMBL2835
CHEMBL3928129	CHEMBL2971
CHEMBL3928249	CHEMBL2971
CHEMBL3928249	CHEMBL2835
CHEMBL3928595	CHEMBL4523
CHEMBL3928595	CHEMBL2147
CHEMBL3929011	CHEMBL5407
CHEMBL3929011	CHEMBL2147
CHEMBL3929011	CHEMBL4523
CHEMBL3929168	CHEMBL234
CHEMBL3929168	CHEMBL224
CHEMBL3929168	CHEMBL217
CHEMBL3929264	CHEMBL2147
CHEMBL3929264	CHEMBL5407
CHEMBL3929534	CHEMBL209
CHEMBL3929534	CHEMBL1741195
CHEMBL3929573	CHEMBL2971
CHEMBL3929573	CHEMBL2835
CHEMBL3929734	CHEMBL2835
CHEMBL3929734	CHEMBL2971
CHEMBL3930290	CHEMBL2971
CHEMBL3930290	CHEMBL2148
CHEMBL3930305	CHEMBL2835
CHEMBL3930305	CHEMBL2971
CHEMBL3930515	CHEMBL2722
CHEMBL3930515	CHEMBL1908
CHEMBL3930620	CHEMBL203
CHEMBL3930620	CHEMBL325
CHEMBL3930712	CHEMBL2148
CHEMBL3930712	CHEMBL2835
CHEMBL3931150	CHEMBL2835
CHEMBL3931150	CHEMBL2971
CHEMBL3931274	CHEMBL5407
CHEMBL3931274	CHEMBL2147
CHEMBL3931278	CHEMBL2835
CHEMBL3931278	CHEMBL2971
CHEMBL3931279	CHEMBL5407
CHEMBL3931279	CHEMBL2147
CHEMBL3931819	CHEMBL2971
CHEMBL3931819	CHEMBL2835
CHEMBL3932186	CHEMBL234
CHEMBL3932186	CHEMBL224
CHEMBL3932460	CHEMBL2147
CHEMBL3932460	CHEMBL4523
CHEMBL3932623	CHEMBL2835
CHEMBL3932623	CHEMBL2971
CHEMBL3932881	CHEMBL2835
CHEMBL3932881	CHEMBL2971
CHEMBL3933719	CHEMBL2147
CHEMBL3933719	CHEMBL4523
CHEMBL3933766	CHEMBL2835
CHEMBL3933766	CHEMBL2971
CHEMBL3933868	CHEMBL5407
CHEMBL3933868	CHEMBL2147
CHEMBL3934335	CHEMBL2971
CHEMBL3934335	CHEMBL2835
CHEMBL3934383	CHEMBL5407
CHEMBL3934383	CHEMBL2147
CHEMBL3934383	CHEMBL4523
CHEMBL3934709	CHEMBL2835
CHEMBL3934709	CHEMBL2971
CHEMBL3934942	CHEMBL2971
CHEMBL3934942	CHEMBL2148
CHEMBL3934963	CHEMBL2971
CHEMBL3934963	CHEMBL2835
CHEMBL3935018	CHEMBL5407
CHEMBL3935018	CHEMBL2147
CHEMBL3935018	CHEMBL4523
CHEMBL3935096	CHEMBL5407
CHEMBL3935096	CHEMBL2147
CHEMBL3935096	CHEMBL4523
CHEMBL3935178	CHEMBL2835
CHEMBL3935178	CHEMBL2971
CHEMBL3935396	CHEMBL2971
CHEMBL3935396	CHEMBL2835
CHEMBL3936320	CHEMBL2147
CHEMBL3936320	CHEMBL4523
CHEMBL3936541	CHEMBL2971
CHEMBL3936541	CHEMBL2835
CHEMBL3936990	CHEMBL4501
CHEMBL3936990	CHEMBL4282
CHEMBL3936992	CHEMBL2147
CHEMBL3936992	CHEMBL4523
CHEMBL3937034	CHEMBL5407
CHEMBL3937034	CHEMBL2147
CHEMBL3937195	CHEMBL2835
CHEMBL3937195	CHEMBL2971
CHEMBL3937204	CHEMBL2971
CHEMBL3937204	CHEMBL2148
CHEMBL3937222	CHEMBL1741195
CHEMBL3937222	CHEMBL209
CHEMBL3937835	CHEMBL2835
CHEMBL3937835	CHEMBL2971
CHEMBL3937835	CHEMBL2148
CHEMBL3937878	CHEMBL2971
CHEMBL3937878	CHEMBL2835
CHEMBL3937898	CHEMBL2835
CHEMBL3937898	CHEMBL2971
CHEMBL3937927	CHEMBL2971
CHEMBL3937927	CHEMBL2835
CHEMBL3937972	CHEMBL2742
CHEMBL3937972	CHEMBL3650
CHEMBL3937993	CHEMBL3920
CHEMBL3937993	CHEMBL299
CHEMBL3938031	CHEMBL2835
CHEMBL3938031	CHEMBL2971
CHEMBL3938210	CHEMBL217
CHEMBL3938210	CHEMBL224
CHEMBL3938210	CHEMBL234
CHEMBL3938210	CHEMBL214
CHEMBL3938583	CHEMBL5407
CHEMBL3938583	CHEMBL2147
CHEMBL3938660	CHEMBL2971
CHEMBL3938660	CHEMBL2835
CHEMBL3938720	CHEMBL2835
CHEMBL3938720	CHEMBL2971
CHEMBL3939101	CHEMBL2147
CHEMBL3939101	CHEMBL5407
CHEMBL3939394	CHEMBL5407
CHEMBL3939394	CHEMBL2147
CHEMBL3939580	CHEMBL2835
CHEMBL3939580	CHEMBL2148
CHEMBL3939892	CHEMBL2835
CHEMBL3939892	CHEMBL2971
CHEMBL3940091	CHEMBL4523
CHEMBL3940091	CHEMBL2147
CHEMBL3940227	CHEMBL5407
CHEMBL3940227	CHEMBL2147
CHEMBL3940389	CHEMBL2147
CHEMBL3940389	CHEMBL4523
CHEMBL3940712	CHEMBL234
CHEMBL3940712	CHEMBL224
CHEMBL3940744	CHEMBL5407
CHEMBL3940744	CHEMBL2147
CHEMBL3940744	CHEMBL4523
CHEMBL3940929	CHEMBL2835
CHEMBL3940929	CHEMBL2971
CHEMBL3941202	CHEMBL2835
CHEMBL3941202	CHEMBL2971
CHEMBL3941211	CHEMBL2971
CHEMBL3941211	CHEMBL2148
CHEMBL3942104	CHEMBL2147
CHEMBL3942104	CHEMBL5407
CHEMBL3942446	CHEMBL5407
CHEMBL3942446	CHEMBL2147
CHEMBL3942542	CHEMBL2835
CHEMBL3942542	CHEMBL2971
CHEMBL3942619	CHEMBL299
CHEMBL3942619	CHEMBL262
CHEMBL3942721	CHEMBL1906
CHEMBL3942721	CHEMBL5145
CHEMBL3942763	CHEMBL2742
CHEMBL3942763	CHEMBL3650
CHEMBL3943096	CHEMBL209
CHEMBL3943096	CHEMBL1741195
CHEMBL3943572	CHEMBL2835
CHEMBL3943572	CHEMBL2971
CHEMBL3943705	CHEMBL5407
CHEMBL3943705	CHEMBL2147
CHEMBL3943705	CHEMBL4523
CHEMBL3943759	CHEMBL5407
CHEMBL3943759	CHEMBL2147
CHEMBL3944062	CHEMBL5407
CHEMBL3944062	CHEMBL2147
CHEMBL3944062	CHEMBL4523
CHEMBL3944136	CHEMBL4523
CHEMBL3944136	CHEMBL2147
CHEMBL3944365	CHEMBL4523
CHEMBL3944365	CHEMBL2147
CHEMBL3944464	CHEMBL2828
CHEMBL3944464	CHEMBL4937
CHEMBL3945832	CHEMBL2973
CHEMBL3945832	CHEMBL3231
CHEMBL3945908	CHEMBL2835
CHEMBL3945908	CHEMBL2971
CHEMBL3945935	CHEMBL1906
CHEMBL3945935	CHEMBL5145
CHEMBL3946152	CHEMBL2147
CHEMBL3946152	CHEMBL4523
CHEMBL3946306	CHEMBL5407
CHEMBL3946306	CHEMBL2147
CHEMBL3946970	CHEMBL5407
CHEMBL3946970	CHEMBL2147
CHEMBL3946970	CHEMBL4523
CHEMBL3946995	CHEMBL234
CHEMBL3946995	CHEMBL224
CHEMBL3947213	CHEMBL4523
CHEMBL3947213	CHEMBL2147
CHEMBL3947292	CHEMBL2835
CHEMBL3947292	CHEMBL2971
CHEMBL3947309	CHEMBL5407
CHEMBL3947309	CHEMBL2147
CHEMBL3947456	CHEMBL2835
CHEMBL3947456	CHEMBL2971
CHEMBL3947484	CHEMBL2147
CHEMBL3947484	CHEMBL5407
CHEMBL3947540	CHEMBL2835
CHEMBL3947540	CHEMBL2971
CHEMBL3947770	CHEMBL5407
CHEMBL3947770	CHEMBL2147
CHEMBL3947977	CHEMBL2835
CHEMBL3947977	CHEMBL2971
CHEMBL3948039	CHEMBL2971
CHEMBL3948039	CHEMBL2835
CHEMBL3948056	CHEMBL234
CHEMBL3948056	CHEMBL224
CHEMBL3948056	CHEMBL217
CHEMBL3948591	CHEMBL2835
CHEMBL3948591	CHEMBL2971
CHEMBL3948713	CHEMBL237
CHEMBL3948713	CHEMBL233
CHEMBL3948854	CHEMBL4625
CHEMBL3948854	CHEMBL4860
CHEMBL3949102	CHEMBL2147
CHEMBL3949102	CHEMBL4523
CHEMBL3949136	CHEMBL2973
CHEMBL3949136	CHEMBL3231
CHEMBL3949175	CHEMBL2147
CHEMBL3949175	CHEMBL4523
CHEMBL3949274	CHEMBL5407
CHEMBL3949274	CHEMBL2147
CHEMBL3949274	CHEMBL4523
CHEMBL3949310	CHEMBL2835
CHEMBL3949310	CHEMBL2971
CHEMBL3949394	CHEMBL2971
CHEMBL3949394	CHEMBL2835
CHEMBL3950143	CHEMBL2971
CHEMBL3950143	CHEMBL2835
CHEMBL3950269	CHEMBL5407
CHEMBL3950269	CHEMBL2147
CHEMBL3950981	CHEMBL2835
CHEMBL3950981	CHEMBL2971
CHEMBL3951001	CHEMBL209
CHEMBL3951001	CHEMBL1741195
CHEMBL3951088	CHEMBL2147
CHEMBL3951088	CHEMBL5407
CHEMBL3951178	CHEMBL2835
CHEMBL3951178	CHEMBL2971
CHEMBL3951198	CHEMBL209
CHEMBL3951198	CHEMBL1741195
CHEMBL3951474	CHEMBL1906
CHEMBL3951474	CHEMBL5145
CHEMBL3951623	CHEMBL2971
CHEMBL3951623	CHEMBL2148
CHEMBL3951741	CHEMBL2147
CHEMBL3951741	CHEMBL5407
CHEMBL3951786	CHEMBL3650
CHEMBL3951786	CHEMBL2742
CHEMBL3951874	CHEMBL2835
CHEMBL3951874	CHEMBL2971
CHEMBL3951947	CHEMBL2971
CHEMBL3951947	CHEMBL2835
CHEMBL3952022	CHEMBL2971
CHEMBL3952022	CHEMBL2835
CHEMBL3952029	CHEMBL2971
CHEMBL3952029	CHEMBL2835
CHEMBL3952360	CHEMBL5407
CHEMBL3952360	CHEMBL2147
CHEMBL3952555	CHEMBL2971
CHEMBL3952555	CHEMBL2148
CHEMBL3952845	CHEMBL5407
CHEMBL3952845	CHEMBL2147
CHEMBL3953164	CHEMBL5407
CHEMBL3953164	CHEMBL2147
CHEMBL3953164	CHEMBL4523
CHEMBL3953482	CHEMBL2147
CHEMBL3953482	CHEMBL5407
CHEMBL3953947	CHEMBL2835
CHEMBL3953947	CHEMBL2971
CHEMBL3954558	CHEMBL2971
CHEMBL3954558	CHEMBL2148
CHEMBL3954782	CHEMBL237
CHEMBL3954782	CHEMBL233
CHEMBL3954782	CHEMBL236
CHEMBL3955604	CHEMBL5407
CHEMBL3955604	CHEMBL2147
CHEMBL3955743	CHEMBL1906
CHEMBL3955743	CHEMBL5145
CHEMBL3955757	CHEMBL2971
CHEMBL3955757	CHEMBL2148
CHEMBL3955880	CHEMBL4523
CHEMBL3955880	CHEMBL2147
CHEMBL3956075	CHEMBL2835
CHEMBL3956075	CHEMBL2971
CHEMBL3956152	CHEMBL2971
CHEMBL3956152	CHEMBL2835
CHEMBL3956155	CHEMBL2147
CHEMBL3956155	CHEMBL5407
CHEMBL3956440	CHEMBL5407
CHEMBL3956440	CHEMBL2147
CHEMBL3956529	CHEMBL2835
CHEMBL3956529	CHEMBL2971
CHEMBL3956628	CHEMBL2835
CHEMBL3956628	CHEMBL2971
CHEMBL3956651	CHEMBL2835
CHEMBL3956651	CHEMBL2971
CHEMBL3956717	CHEMBL5407
CHEMBL3956717	CHEMBL2147
CHEMBL3956720	CHEMBL234
CHEMBL3956720	CHEMBL224
CHEMBL3956720	CHEMBL217
CHEMBL3956720	CHEMBL214
CHEMBL3956882	CHEMBL2971
CHEMBL3956882	CHEMBL2148
CHEMBL3957073	CHEMBL2147
CHEMBL3957073	CHEMBL4523
CHEMBL3957106	CHEMBL1741195
CHEMBL3957106	CHEMBL209
CHEMBL3957132	CHEMBL2835
CHEMBL3957132	CHEMBL2971
CHEMBL3957195	CHEMBL2835
CHEMBL3957195	CHEMBL2971
CHEMBL3957231	CHEMBL2971
CHEMBL3957231	CHEMBL2835
CHEMBL3957954	CHEMBL2147
CHEMBL3957954	CHEMBL4523
CHEMBL3957997	CHEMBL5407
CHEMBL3957997	CHEMBL2147
CHEMBL3958253	CHEMBL5407
CHEMBL3958253	CHEMBL2147
CHEMBL3958307	CHEMBL4523
CHEMBL3958307	CHEMBL2147
CHEMBL3958691	CHEMBL2971
CHEMBL3958691	CHEMBL2835
CHEMBL3958785	CHEMBL2147
CHEMBL3958785	CHEMBL5407
CHEMBL3958862	CHEMBL2147
CHEMBL3958862	CHEMBL4523
CHEMBL3958969	CHEMBL280
CHEMBL3958969	CHEMBL333
CHEMBL3959005	CHEMBL2835
CHEMBL3959005	CHEMBL2971
CHEMBL3959091	CHEMBL2147
CHEMBL3959091	CHEMBL5407
CHEMBL3959091	CHEMBL4523
CHEMBL3959266	CHEMBL2835
CHEMBL3959266	CHEMBL2971
CHEMBL3959358	CHEMBL2835
CHEMBL3959358	CHEMBL2971
CHEMBL3959398	CHEMBL3638334
CHEMBL3959398	CHEMBL233
CHEMBL3959433	CHEMBL2835
CHEMBL3959433	CHEMBL2971
CHEMBL3959581	CHEMBL1906
CHEMBL3959581	CHEMBL5145
CHEMBL3959770	CHEMBL2835
CHEMBL3959770	CHEMBL2971
CHEMBL3959909	CHEMBL2835
CHEMBL3959909	CHEMBL2971
CHEMBL3959924	CHEMBL2971
CHEMBL3959924	CHEMBL2835
CHEMBL3960213	CHEMBL2971
CHEMBL3960213	CHEMBL2148
CHEMBL3960416	CHEMBL2971
CHEMBL3960416	CHEMBL2148
CHEMBL3960554	CHEMBL5407
CHEMBL3960554	CHEMBL2147
CHEMBL3960554	CHEMBL4523
CHEMBL3960785	CHEMBL234
CHEMBL3960785	CHEMBL217
CHEMBL3960785	CHEMBL224
CHEMBL3961360	CHEMBL5407
CHEMBL3961360	CHEMBL2147
CHEMBL3961393	CHEMBL2835
CHEMBL3961393	CHEMBL2971
CHEMBL3961525	CHEMBL5407
CHEMBL3961525	CHEMBL2147
CHEMBL3961670	CHEMBL2835
CHEMBL3961670	CHEMBL2971
CHEMBL3961692	CHEMBL2147
CHEMBL3961692	CHEMBL5407
CHEMBL3961692	CHEMBL4523
CHEMBL3961850	CHEMBL2971
CHEMBL3961850	CHEMBL2148
CHEMBL3962064	CHEMBL2147
CHEMBL3962064	CHEMBL4523
CHEMBL3962342	CHEMBL2835
CHEMBL3962342	CHEMBL2971
CHEMBL3962386	CHEMBL2835
CHEMBL3962386	CHEMBL2971
CHEMBL3962448	CHEMBL2971
CHEMBL3962448	CHEMBL2148
CHEMBL3962506	CHEMBL2835
CHEMBL3962506	CHEMBL2971
CHEMBL3962525	CHEMBL234
CHEMBL3962525	CHEMBL224
CHEMBL3963191	CHEMBL2835
CHEMBL3963191	CHEMBL2971
CHEMBL3963271	CHEMBL2835
CHEMBL3963271	CHEMBL2971
CHEMBL3963605	CHEMBL299
CHEMBL3963605	CHEMBL262
CHEMBL3963605	CHEMBL3920
CHEMBL3963779	CHEMBL2971
CHEMBL3963779	CHEMBL2835
CHEMBL3963946	CHEMBL5407
CHEMBL3963946	CHEMBL2147
CHEMBL3964279	CHEMBL2971
CHEMBL3964279	CHEMBL2835
CHEMBL3964367	CHEMBL2147
CHEMBL3964367	CHEMBL4523
CHEMBL3964598	CHEMBL237
CHEMBL3964598	CHEMBL233
CHEMBL3964801	CHEMBL2835
CHEMBL3964801	CHEMBL2971
CHEMBL3964990	CHEMBL2835
CHEMBL3964990	CHEMBL2971
CHEMBL3965069	CHEMBL1741195
CHEMBL3965069	CHEMBL209
CHEMBL3965297	CHEMBL2147
CHEMBL3965297	CHEMBL4523
CHEMBL3965448	CHEMBL2835
CHEMBL3965448	CHEMBL2971
CHEMBL3965643	CHEMBL2147
CHEMBL3965643	CHEMBL4523
CHEMBL3965713	CHEMBL2835
CHEMBL3965713	CHEMBL2971
CHEMBL3965741	CHEMBL2147
CHEMBL3965741	CHEMBL5407
CHEMBL3965757	CHEMBL2147
CHEMBL3965757	CHEMBL4523
CHEMBL3965809	CHEMBL2835
CHEMBL3965809	CHEMBL2971
CHEMBL3965946	CHEMBL2147
CHEMBL3965946	CHEMBL4523
CHEMBL3966363	CHEMBL4523
CHEMBL3966363	CHEMBL2147
CHEMBL3966595	CHEMBL299
CHEMBL3966595	CHEMBL3920
CHEMBL3966643	CHEMBL299
CHEMBL3966643	CHEMBL3920
CHEMBL3966696	CHEMBL5407
CHEMBL3966696	CHEMBL2147
CHEMBL3966732	CHEMBL2147
CHEMBL3966732	CHEMBL4523
CHEMBL3966766	CHEMBL1906
CHEMBL3966766	CHEMBL5145
CHEMBL3966806	CHEMBL4501
CHEMBL3966806	CHEMBL4282
CHEMBL3966830	CHEMBL237
CHEMBL3966830	CHEMBL233
CHEMBL3966842	CHEMBL234
CHEMBL3966842	CHEMBL224
CHEMBL3966842	CHEMBL217
CHEMBL3967830	CHEMBL2835
CHEMBL3967830	CHEMBL2971
CHEMBL3967893	CHEMBL1906
CHEMBL3967893	CHEMBL5145
CHEMBL3968206	CHEMBL2147
CHEMBL3968206	CHEMBL5407
CHEMBL3968315	CHEMBL2835
CHEMBL3968315	CHEMBL2971
CHEMBL3968781	CHEMBL2835
CHEMBL3968781	CHEMBL2971
CHEMBL3968925	CHEMBL4005
CHEMBL3968925	CHEMBL3267
CHEMBL3969155	CHEMBL237
CHEMBL3969155	CHEMBL233
CHEMBL3969253	CHEMBL2971
CHEMBL3969253	CHEMBL2835
CHEMBL3970090	CHEMBL299
CHEMBL3970090	CHEMBL3920
CHEMBL3970360	CHEMBL2835
CHEMBL3970360	CHEMBL2971
CHEMBL3970779	CHEMBL2835
CHEMBL3970779	CHEMBL2971
CHEMBL3970953	CHEMBL5407
CHEMBL3970953	CHEMBL2147
CHEMBL3970953	CHEMBL4523
CHEMBL3970981	CHEMBL5407
CHEMBL3970981	CHEMBL2147
CHEMBL3970998	CHEMBL2835
CHEMBL3970998	CHEMBL2971
CHEMBL3971083	CHEMBL2835
CHEMBL3971083	CHEMBL2971
CHEMBL3971342	CHEMBL4523
CHEMBL3971342	CHEMBL2147
CHEMBL3971538	CHEMBL1945
CHEMBL3971538	CHEMBL1946
CHEMBL3971672	CHEMBL2971
CHEMBL3971672	CHEMBL2835
CHEMBL3971907	CHEMBL224
CHEMBL3971907	CHEMBL217
CHEMBL3971907	CHEMBL234
CHEMBL3972050	CHEMBL2147
CHEMBL3972050	CHEMBL5407
CHEMBL3972453	CHEMBL5407
CHEMBL3972453	CHEMBL2147
CHEMBL3972612	CHEMBL2835
CHEMBL3972612	CHEMBL2971
CHEMBL3972830	CHEMBL2835
CHEMBL3972830	CHEMBL2971
CHEMBL3973487	CHEMBL234
CHEMBL3973487	CHEMBL214
CHEMBL3973544	CHEMBL5407
CHEMBL3973544	CHEMBL2147
CHEMBL3973547	CHEMBL2971
CHEMBL3973547	CHEMBL2835
CHEMBL3973848	CHEMBL2971
CHEMBL3973848	CHEMBL2148
CHEMBL3974543	CHEMBL4523
CHEMBL3974543	CHEMBL2147
CHEMBL3974857	CHEMBL237
CHEMBL3974857	CHEMBL233
CHEMBL3975046	CHEMBL2835
CHEMBL3975046	CHEMBL2971
CHEMBL3975198	CHEMBL5407
CHEMBL3975198	CHEMBL2147
CHEMBL3975506	CHEMBL2835
CHEMBL3975506	CHEMBL2971
CHEMBL3975634	CHEMBL1936
CHEMBL3975634	CHEMBL2553
CHEMBL3975634	CHEMBL1974
CHEMBL3975634	CHEMBL2971
CHEMBL3975634	CHEMBL5407
CHEMBL3975634	CHEMBL3829
CHEMBL3975756	CHEMBL2147
CHEMBL3975756	CHEMBL5407
CHEMBL3975764	CHEMBL2147
CHEMBL3975764	CHEMBL5407
CHEMBL3975787	CHEMBL5407
CHEMBL3975787	CHEMBL2147
CHEMBL3976267	CHEMBL5407
CHEMBL3976267	CHEMBL2147
CHEMBL3976267	CHEMBL4523
CHEMBL3976275	CHEMBL2742
CHEMBL3976275	CHEMBL3650
CHEMBL3976282	CHEMBL234
CHEMBL3976282	CHEMBL224
CHEMBL3976282	CHEMBL217
CHEMBL3976307	CHEMBL2835
CHEMBL3976307	CHEMBL2971
CHEMBL3976610	CHEMBL2971
CHEMBL3976610	CHEMBL2835
CHEMBL3977158	CHEMBL3629
CHEMBL3977158	CHEMBL4070
CHEMBL3977237	CHEMBL2971
CHEMBL3977237	CHEMBL2835
CHEMBL3977452	CHEMBL2971
CHEMBL3977452	CHEMBL2148
CHEMBL3977509	CHEMBL2971
CHEMBL3977509	CHEMBL2148
CHEMBL3978754	CHEMBL2742
CHEMBL3978754	CHEMBL3650
CHEMBL3979182	CHEMBL4523
CHEMBL3979182	CHEMBL2147
CHEMBL3979537	CHEMBL2971
CHEMBL3979537	CHEMBL2835
CHEMBL3980040	CHEMBL2147
CHEMBL3980040	CHEMBL5407
CHEMBL3980746	CHEMBL299
CHEMBL3980746	CHEMBL3920
CHEMBL3980778	CHEMBL2835
CHEMBL3980778	CHEMBL2148
CHEMBL3980864	CHEMBL237
CHEMBL3980864	CHEMBL233
CHEMBL3980959	CHEMBL2971
CHEMBL3980959	CHEMBL2835
CHEMBL3981057	CHEMBL1946
CHEMBL3981057	CHEMBL1945
CHEMBL3981144	CHEMBL2971
CHEMBL3981144	CHEMBL2835
CHEMBL3981187	CHEMBL2835
CHEMBL3981187	CHEMBL2971
CHEMBL3981769	CHEMBL299
CHEMBL3981769	CHEMBL3920
CHEMBL3982255	CHEMBL2971
CHEMBL3982255	CHEMBL2148
CHEMBL3982307	CHEMBL2971
CHEMBL3982307	CHEMBL2148
CHEMBL3982408	CHEMBL2835
CHEMBL3982408	CHEMBL2971
CHEMBL3982418	CHEMBL2722
CHEMBL3982418	CHEMBL1908
CHEMBL3982486	CHEMBL234
CHEMBL3982486	CHEMBL214
CHEMBL3982486	CHEMBL224
CHEMBL3982486	CHEMBL217
CHEMBL3982497	CHEMBL299
CHEMBL3982497	CHEMBL3920
CHEMBL3982539	CHEMBL5407
CHEMBL3982539	CHEMBL2147
CHEMBL3982539	CHEMBL4523
CHEMBL3983009	CHEMBL299
CHEMBL3983009	CHEMBL3920
CHEMBL3983040	CHEMBL2835
CHEMBL3983040	CHEMBL2971
CHEMBL3983256	CHEMBL2835
CHEMBL3983256	CHEMBL2971
CHEMBL3983351	CHEMBL5407
CHEMBL3983351	CHEMBL2147
CHEMBL3983918	CHEMBL3650
CHEMBL3983918	CHEMBL2742
CHEMBL3983983	CHEMBL2835
CHEMBL3983983	CHEMBL2971
CHEMBL3984183	CHEMBL2147
CHEMBL3984183	CHEMBL5407
CHEMBL3984183	CHEMBL4523
CHEMBL3984282	CHEMBL1906
CHEMBL3984282	CHEMBL5145
CHEMBL3984319	CHEMBL2835
CHEMBL3984319	CHEMBL2971
CHEMBL3984720	CHEMBL2835
CHEMBL3984720	CHEMBL2971
CHEMBL3984741	CHEMBL2971
CHEMBL3984741	CHEMBL2835
CHEMBL3984764	CHEMBL2971
CHEMBL3984764	CHEMBL2148
CHEMBL3984793	CHEMBL2971
CHEMBL3984793	CHEMBL2148
CHEMBL3984961	CHEMBL2147
CHEMBL3984961	CHEMBL4523

## Sheet: Hitpick V2
id	ChEMBL-ID	Predicted/Known Target	Most Similar Compound	Precision	Tc	Rank	method
CHEMBL3218576	CHEMBL3130	PIK3CD	CHEMBL1241857	59.8	0.552	2	hitpick
CHEMBL3218576	CHEMBL4005	PIK3CA	CHEMBL1241857	47.8	0.552	5	hitpick
CHEMBL3889936	CHEMBL4270	MMP10	CHEMBL3337869	26.1	0.511	9	hitpick
CHEMBL3889936	CHEMBL280	MMP13	CHEMBL3337869	19.7	0.511	10	hitpick
CHEMBL3889937	CHEMBL2835	JAK1	CHEMBL3667521	74.5	0.426	1	hitpick
CHEMBL3889937	CHEMBL2971	JAK2	CHEMBL2178801	33.3*	0.326	4	hitpick
CHEMBL3890156	CHEMBL1741195	TMPRSS15	CHEMBL3642964	88.3	0.5	1	hitpick
CHEMBL3890156	CHEMBL209	PRSS1	CHEMBL3642964	86.5	0.5	2	hitpick
CHEMBL3890208	CHEMBL2148	JAK3	CHEMBL1630766	41.5	0.409	9	hitpick
CHEMBL3890487	CHEMBL2835	JAK1	CHEMBL3667523	74.5	0.469	1	hitpick
CHEMBL3890487	CHEMBL2971	JAK2	CHEMBL2178801	60.5	0.4	2	hitpick
CHEMBL3890530	CHEMBL2147	PIM1	CHEMBL3685747	74.5	0.418	1	hitpick
CHEMBL3890530	CHEMBL4523	PIM2	CHEMBL3685747	60.5	0.418	2	hitpick
CHEMBL3890537	CHEMBL2835	JAK1	CHEMBL3667523	74.5	0.488	1	hitpick
CHEMBL3890537	CHEMBL2971	JAK2	CHEMBL2178801	60.5	0.417	2	hitpick
CHEMBL3890701	CHEMBL2148	JAK3	CHEMBL1630766	74.5	0.486	1	hitpick
CHEMBL3890701	CHEMBL2835	JAK1	CHEMBL1630766	54.5	0.486	3	hitpick
CHEMBL3890745	CHEMBL2147	PIM1	CHEMBL3634782	8.4	0.299	1	hitpick
CHEMBL3890745	CHEMBL5407	PIM3	CHEMBL3634782	2.6	0.299	5	hitpick
CHEMBL3890953	CHEMBL5407	PIM3	CHEMBL3634783	11.5	0.365	8	hitpick
CHEMBL3890953	CHEMBL2147	PIM1	CHEMBL3634783	10.3	0.365	9	hitpick
CHEMBL3890962	CHEMBL3629	CSNK2A1	CHEMBL3699239	25.8	0.363	2	hitpick
CHEMBL3891057	CHEMBL2835	JAK1	CHEMBL3667523	74.5	0.496	1	hitpick
CHEMBL3891057	CHEMBL2971	JAK2	CHEMBL2178801	60.5	0.435	2	hitpick
CHEMBL3891120	CHEMBL3991	F7	SBSM37590	92.8	0.744	1	hitpick
CHEMBL3891137	CHEMBL2835	JAK1	CHEMBL3667523	74.5	0.469	1	hitpick
CHEMBL3891137	CHEMBL2971	JAK2	CHEMBL2178801	60.5	0.41	2	hitpick
CHEMBL3891172	CHEMBL2835	JAK1	CHEMBL3699558	95.4	0.611	1	hitpick
CHEMBL3891172	CHEMBL2971	JAK2	CHEMBL3650683	50.7	0.541	3	hitpick
CHEMBL3891228	CHEMBL1741195	TMPRSS15	CHEMBL3642888	88.3	0.553	1	hitpick
CHEMBL3891228	CHEMBL209	PRSS1	CHEMBL3642888	86.5	0.553	2	hitpick
CHEMBL3891615	CHEMBL2835	JAK1	CHEMBL3667523	74.5	0.473	1	hitpick
CHEMBL3891615	CHEMBL2971	JAK2	CHEMBL2178801	60.5	0.403	2	hitpick
CHEMBL3891851	CHEMBL2147	PIM1	CHEMBL3393722	7.6*	0.293	1	hitpick
CHEMBL3891851	CHEMBL4523	PIM2	CHEMBL3393722	7.4*	0.293	2	hitpick
CHEMBL3891851	CHEMBL5407	PIM3	CHEMBL3393722	2.6	0.293	4	hitpick
CHEMBL3892509	CHEMBL2147	PIM1	CHEMBL3634767	36.9	0.466	2	hitpick
CHEMBL3892509	CHEMBL5407	PIM3	CHEMBL3634767	28.5	0.466	3	hitpick
CHEMBL3892526	CHEMBL2835	JAK1	CHEMBL3667521	74.5	0.42	1	hitpick
CHEMBL3892526	CHEMBL2971	JAK2	CHEMBL2178801	33.3*	0.321	4	hitpick
CHEMBL3892536	CHEMBL2147	PIM1	CHEMBL3634770	54.5	0.427	1	hitpick
CHEMBL3892536	CHEMBL5407	PIM3	CHEMBL3634770	48.4	0.427	2	hitpick
CHEMBL3892885	CHEMBL5407	PIM3	CHEMBL3634760	8.4	0.283	1	hitpick
CHEMBL3892885	CHEMBL4523	PIM2	CHEMBL3634760	7.4*	0.283	2	hitpick
CHEMBL3892885	CHEMBL2147	PIM1	CHEMBL3634760	2.6	0.283	4	hitpick
CHEMBL3893327	CHEMBL2148	JAK3	CHEMBL1630766	40.3	0.514	7	hitpick
CHEMBL3893449	CHEMBL2835	JAK1	CHEMBL3667523	74.5	0.484	1	hitpick
CHEMBL3893449	CHEMBL2971	JAK2	CHEMBL2178801	60.5	0.413	2	hitpick
CHEMBL3893643	CHEMBL233	OPRM1	SBSM539179	96.7	0.745	2	hitpick
CHEMBL3893643	CHEMBL237	OPRK1	SBSM42261	94.5	0.713	4	hitpick
CHEMBL3893713	CHEMBL2835	JAK1	CHEMBL3667521	57.9	0.437	2	hitpick
CHEMBL3893713	CHEMBL2971	JAK2	CHEMBL2178801	50.0*	0.333	3	hitpick
CHEMBL3894557	CHEMBL233	OPRM1	CHEMBL3326228	94	0.706	1	hitpick
CHEMBL3894571	CHEMBL5543	DYRK1B	CHEMBL2386761	97.4	0.768	1	hitpick
CHEMBL3894571	CHEMBL2292	DYRK1A	CHEMBL2386761	96.7	0.768	2	hitpick
CHEMBL3894688	CHEMBL2971	JAK2	CHEMBL2178801	66.6*	0.347	2	hitpick
CHEMBL3894688	CHEMBL2835	JAK1	CHEMBL3667521	59.4	0.433	3	hitpick
CHEMBL3895094	CHEMBL5407	PIM3	CHEMBL3634783	7.4*	0.243	3	hitpick
CHEMBL3895094	CHEMBL2147	PIM1	CHEMBL3634783	10	0.243	9	hitpick
CHEMBL3895124	CHEMBL2147	PIM1	SBSM37349	20	0.37	2	hitpick
CHEMBL3895272	CHEMBL2835	JAK1	CHEMBL3647843	52.3	0.36	2	hitpick
CHEMBL3895531	CHEMBL5407	PIM3	CHEMBL3634783	21.4	0.345	4	hitpick
CHEMBL3895531	CHEMBL2147	PIM1	CHEMBL3634783	20	0.345	5	hitpick
CHEMBL3895540	CHEMBL217	DRD2	CHEMBL3289975	63.6	0.58	3	hitpick
CHEMBL3895925	CHEMBL2835	JAK1	CHEMBL3702954	88.3	0.541	1	hitpick
CHEMBL3895925	CHEMBL2971	JAK2	CHEMBL3650683	36.9	0.402	3	hitpick
CHEMBL3896005	CHEMBL2835	JAK1	CHEMBL3667521	57.9	0.44	2	hitpick
CHEMBL3896005	CHEMBL2971	JAK2	CHEMBL2178801	50.0*	0.336	3	hitpick
CHEMBL3896124	CHEMBL2147	PIM1	SBSM37060	40.3	0.543	2	hitpick
CHEMBL3896141	CHEMBL2835	JAK1	CHEMBL3667523	88.3	0.5	1	hitpick
CHEMBL3896141	CHEMBL2971	JAK2	CHEMBL2178801	60.5	0.427	3	hitpick
CHEMBL3896244	CHEMBL2147	PIM1	CHEMBL3676275	74.5	0.406	1	hitpick
CHEMBL3896244	CHEMBL4523	PIM2	CHEMBL3676275	60.5	0.406	2	hitpick
CHEMBL3896312	CHEMBL2147	PIM1	CHEMBL3634758	25.0*	0.293	2	hitpick
CHEMBL3896312	CHEMBL5407	PIM3	CHEMBL3634758	23.0*	0.293	4	hitpick
CHEMBL3896312	CHEMBL4523	PIM2	CHEMBL3634758	0.0*	0.293	10	hitpick
CHEMBL3896379	CHEMBL2835	JAK1	CHEMBL3667528	74.5	0.459	1	hitpick
CHEMBL3896379	CHEMBL2971	JAK2	CHEMBL2178801	60.5	0.438	2	hitpick
CHEMBL3896662	CHEMBL2835	JAK1	CHEMBL3667523	74.5	0.488	1	hitpick
CHEMBL3896662	CHEMBL2971	JAK2	CHEMBL2178801	60.5	0.417	2	hitpick
CHEMBL3896759	CHEMBL2835	JAK1	CHEMBL3667523	74.5	0.484	1	hitpick
CHEMBL3896759	CHEMBL2971	JAK2	CHEMBL2178801	60.5	0.413	2	hitpick
CHEMBL3896782	CHEMBL2147	PIM1	SBSM37349	20	0.384	4	hitpick
CHEMBL3896791	CHEMBL1741195	TMPRSS15	CHEMBL3642964	88.3	0.5	1	hitpick
CHEMBL3896791	CHEMBL209	PRSS1	CHEMBL3642964	86.5	0.5	2	hitpick
CHEMBL3896877	CHEMBL233	OPRM1	CHEMBL3667190	97.4	0.722	1	hitpick
CHEMBL3896877	CHEMBL237	OPRK1	CHEMBL426084	89.8	0.556	2	hitpick
CHEMBL3896937	CHEMBL224	HTR2A	CHEMBL3289975	54.5	0.495	2	hitpick
CHEMBL3896937	CHEMBL217	DRD2	CHEMBL3289975	48.4	0.495	5	hitpick
CHEMBL3897068	CHEMBL237	OPRK1	Diprenorphine	76.2	0.625	1	hitpick
CHEMBL3897068	CHEMBL233	OPRM1	Diprenorphine	66.5	0.625	6	hitpick
CHEMBL3897108	CHEMBL1741195	TMPRSS15	CHEMBL3642898	88.3	0.57	1	hitpick
CHEMBL3897108	CHEMBL209	PRSS1	CHEMBL3642898	86.5	0.57	2	hitpick
CHEMBL3897112	CHEMBL2835	JAK1	CHEMBL3667521	57.9	0.47	2	hitpick
CHEMBL3897112	CHEMBL2971	JAK2	CHEMBL2178801	33.3*	0.358	4	hitpick
CHEMBL3897323	CHEMBL2147	PIM1	CHEMBL3685747	74.5	0.481	3	hitpick
CHEMBL3897323	CHEMBL4523	PIM2	CHEMBL3685747	60.5	0.481	4	hitpick
CHEMBL3897417	CHEMBL2148	JAK3	CHEMBL1630766	65.2*	0.493	4	hitpick
CHEMBL3897417	CHEMBL2835	JAK1	CHEMBL1630766	40.0*	0.493	9	hitpick
CHEMBL3897912	CHEMBL5407	PIM3	CHEMBL3393722	35.7*	0.25	3	hitpick
CHEMBL3897912	CHEMBL2147	PIM1	CHEMBL3393722	16.1	0.25	6	hitpick
CHEMBL3897912	CHEMBL4523	PIM2	CHEMBL3393722	12.5	0.25	8	hitpick
CHEMBL3897967	CHEMBL237	OPRK1	CHEMBL2338752	95.4	0.68	1	hitpick
CHEMBL3897967	CHEMBL233	OPRM1	Diprenorphine	91.3	0.667	2	hitpick
CHEMBL3897993	CHEMBL2835	JAK1	CHEMBL3667523	74.5	0.492	1	hitpick
CHEMBL3897993	CHEMBL2971	JAK2	CHEMBL2178801	60.5	0.42	2	hitpick
CHEMBL3898231	CHEMBL2835	JAK1	CHEMBL3667523	74.5	0.455	1	hitpick
CHEMBL3898231	CHEMBL2971	JAK2	CHEMBL2178801	33.3*	0.388	4	hitpick
CHEMBL3898371	CHEMBL3991	F7	SBSM37592	91.5	0.99	2	hitpick
CHEMBL3898989	CHEMBL5407	PIM3	CHEMBL3634760	8.4	0.286	1	hitpick
CHEMBL3898989	CHEMBL4523	PIM2	CHEMBL3634760	7.4*	0.286	2	hitpick
CHEMBL3898989	CHEMBL2147	PIM1	CHEMBL3634760	2.6	0.286	4	hitpick
CHEMBL3899109	CHEMBL2835	JAK1	CHEMBL3667523	74.5	0.473	1	hitpick
CHEMBL3899109	CHEMBL2971	JAK2	CHEMBL2178801	60.5	0.403	2	hitpick
CHEMBL3899281	CHEMBL2835	JAK1	CHEMBL3699537	88.3	0.541	1	hitpick
CHEMBL3899281	CHEMBL2971	JAK2	CHEMBL3650684	46.1	0.415	3	hitpick
CHEMBL3899672	CHEMBL2835	JAK1	CHEMBL1630766	78.4	0.537	2	hitpick
CHEMBL3899672	CHEMBL2148	JAK3	CHEMBL1630766	70.4	0.537	3	hitpick
CHEMBL3899762	CHEMBL2835	JAK1	CHEMBL3667523	74.5	0.492	1	hitpick
CHEMBL3899762	CHEMBL2971	JAK2	CHEMBL2178801	60.5	0.431	2	hitpick
CHEMBL3900004	CHEMBL2835	JAK1	CHEMBL3667523	74.5	0.473	1	hitpick
CHEMBL3900004	CHEMBL2971	JAK2	CHEMBL2178801	60.5	0.403	2	hitpick
CHEMBL3900248	CHEMBL1741195	TMPRSS15	CHEMBL3642961	74.5	0.49	1	hitpick
CHEMBL3900248	CHEMBL209	PRSS1	CHEMBL3642961	57.9	0.49	2	hitpick
CHEMBL3900258	CHEMBL2147	PIM1	CHEMBL3634783	25.0*	0.265	2	hitpick
CHEMBL3900258	CHEMBL5407	PIM3	CHEMBL3634783	23.0*	0.265	4	hitpick
CHEMBL3900425	CHEMBL5407	PIM3	CHEMBL3634768	7.6*	0.267	1	hitpick
CHEMBL3900425	CHEMBL4523	PIM2	CHEMBL3634768	25.0*	0.267	3	hitpick
CHEMBL3900425	CHEMBL2147	PIM1	CHEMBL3634768	23.0*	0.267	4	hitpick
CHEMBL3900752	CHEMBL217	DRD2	CHEMBL3642691	70.4	0.554	1	hitpick
CHEMBL3900795	CHEMBL2147	PIM1	CHEMBL3685737	52.3	0.348	1	hitpick
CHEMBL3900795	CHEMBL4523	PIM2	CHEMBL3685737	33.3*	0.348	4	hitpick
CHEMBL3901124	CHEMBL2148	JAK3	CHEMBL3652401	100	1	1	hitpick
CHEMBL3901124	CHEMBL2835	JAK1	CHEMBL3658859	81.3	0.628	2	hitpick
CHEMBL3901134	CHEMBL2835	JAK1	CHEMBL3667521	70.8*	0.468	1	hitpick
CHEMBL3901134	CHEMBL2971	JAK2	CHEMBL2178801	66.6*	0.375	2	hitpick
CHEMBL3901391	CHEMBL3991	F7	SBSM37590	81.3	0.609	1	hitpick
CHEMBL3901497	CHEMBL2835	JAK1	CHEMBL3639663	74.5	0.434	1	hitpick
CHEMBL3901497	CHEMBL2971	JAK2	CHEMBL2178801	60.5	0.422	2	hitpick
CHEMBL3902417	CHEMBL2147	PIM1	CHEMBL3634783	14	0.314	8	hitpick
CHEMBL3902417	CHEMBL5407	PIM3	CHEMBL3634783	10.3	0.314	10	hitpick
CHEMBL3902498	CHEMBL3991	F7	SBSM37590	81.3	0.609	1	hitpick
CHEMBL3902542	CHEMBL2148	JAK3	CHEMBL3652388	74.5	0.485	1	hitpick
CHEMBL3902579	CHEMBL2835	JAK1	CHEMBL3658869	88.3	0.5	1	hitpick
CHEMBL3903218	CHEMBL2835	JAK1	CHEMBL3667521	59.4	0.456	2	hitpick
CHEMBL3903272	CHEMBL4860	BCL2	CHEMBL3309283	97.4	0.723	1	hitpick
CHEMBL3903272	CHEMBL4625	BCL2L1	CHEMBL3703601	100	1	10	hitpick
CHEMBL3903286	CHEMBL2148	JAK3	CHEMBL1630766	59.4	0.493	1	hitpick
CHEMBL3903560	CHEMBL224	HTR2A	CHEMBL3289975	80.7*	0.512	3	hitpick
CHEMBL3903560	CHEMBL234	DRD3	CHEMBL3697959	49.2	0.5	7	hitpick
CHEMBL3903686	CHEMBL2147	PIM1	SBSM37060	40.3	0.546	3	hitpick
CHEMBL3903720	CHEMBL2835	JAK1	CHEMBL3667523	74.5	0.488	1	hitpick
CHEMBL3903720	CHEMBL2971	JAK2	CHEMBL2178801	60.5	0.427	2	hitpick
CHEMBL3903777	CHEMBL1741195	TMPRSS15	CHEMBL3672881	97.4	0.7	2	hitpick
CHEMBL3903777	CHEMBL209	PRSS1	CHEMBL3672881	96.7	0.7	3	hitpick
CHEMBL3904335	CHEMBL2835	JAK1	CHEMBL3667521	59.4	0.425	2	hitpick
CHEMBL3904982	CHEMBL2835	JAK1	CHEMBL3667523	74.5	0.472	1	hitpick
CHEMBL3904982	CHEMBL2971	JAK2	CHEMBL2178801	60.5	0.413	2	hitpick
CHEMBL3905144	CHEMBL2147	PIM1	SBSM37060	40.3	0.553	1	hitpick
CHEMBL3905150	CHEMBL2148	JAK3	CHEMBL3593776	52.3	0.339	2	hitpick
CHEMBL3905150	CHEMBL2835	JAK1	CHEMBL3593776	34.7*	0.339	3	hitpick
CHEMBL3905194	CHEMBL2147	PIM1	CHEMBL3685737	52.3	0.348	1	hitpick
CHEMBL3905247	CHEMBL217	DRD2	CHEMBL82864	78	0.542	1	hitpick
CHEMBL3905247	CHEMBL234	DRD3	CHEMBL82864	65.4	0.542	2	hitpick
CHEMBL3905788	CHEMBL2835	JAK1	CHEMBL3667523	74.5	0.473	1	hitpick
CHEMBL3905788	CHEMBL2971	JAK2	CHEMBL2178801	60.5	0.403	2	hitpick
CHEMBL3906087	CHEMBL2835	JAK1	CHEMBL3667523	74.5	0.477	1	hitpick
CHEMBL3906087	CHEMBL2971	JAK2	CHEMBL2178801	60.5	0.407	2	hitpick
CHEMBL3906168	CHEMBL2835	JAK1	CHEMBL3667523	88.3	0.513	1	hitpick
CHEMBL3906168	CHEMBL2971	JAK2	CHEMBL2178801	60.5	0.439	3	hitpick
CHEMBL3906357	CHEMBL2147	PIM1	SBSM37060	40.3	0.558	2	hitpick
CHEMBL3906421	CHEMBL5407	PIM3	CHEMBL3634783	8.4	0.288	1	hitpick
CHEMBL3906798	CHEMBL2147	PIM1	CHEMBL3652630	25.0*	0.297	2	hitpick
CHEMBL3906798	CHEMBL4523	PIM2	CHEMBL3634758	25.0*	0.296	3	hitpick
CHEMBL3906798	CHEMBL5407	PIM3	CHEMBL3634758	0.0*	0.296	10	hitpick
CHEMBL3906885	CHEMBL2148	JAK3	CHEMBL1630766	43.5	0.493	7	hitpick
CHEMBL3906961	CHEMBL2835	JAK1	CHEMBL3667523	52.3	0.398	1	hitpick
CHEMBL3907010	CHEMBL3105	PARP1	CHEMBL426116	88.3	0.564	1	hitpick
CHEMBL3907320	CHEMBL5407	PIM3	CHEMBL3634783	10.3	0.333	7	hitpick
CHEMBL3907536	CHEMBL1741195	TMPRSS15	CHEMBL3642964	88.3	0.538	1	hitpick
CHEMBL3907536	CHEMBL209	PRSS1	CHEMBL3642964	86.5	0.538	2	hitpick
CHEMBL3907732	CHEMBL2147	PIM1	SBSM37349	20	0.302	3	hitpick
CHEMBL3908233	CHEMBL2835	JAK1	CHEMBL3667523	74.5	0.476	1	hitpick
CHEMBL3908233	CHEMBL2971	JAK2	CHEMBL2178801	60.5	0.417	2	hitpick
CHEMBL3908328	CHEMBL2835	JAK1	CHEMBL3667523	74.5	0.476	1	hitpick
CHEMBL3908328	CHEMBL2971	JAK2	CHEMBL2178801	60.5	0.417	2	hitpick
CHEMBL3908409	CHEMBL2835	JAK1	CHEMBL3667523	74.5	0.477	1	hitpick
CHEMBL3908409	CHEMBL2971	JAK2	CHEMBL2178265	60.5	0.412	2	hitpick
CHEMBL3909091	CHEMBL2835	JAK1	CHEMBL3667525	74.5	0.455	1	hitpick
CHEMBL3909091	CHEMBL2971	JAK2	CHEMBL2178801	60.5	0.426	2	hitpick
CHEMBL3909092	CHEMBL2835	JAK1	CHEMBL1630766	78.4	0.507	2	hitpick
CHEMBL3909280	CHEMBL5407	PIM3	CHEMBL3634771	38.2	0.331	1	hitpick
CHEMBL3909280	CHEMBL2147	PIM1	CHEMBL3634771	36.5	0.331	2	hitpick
CHEMBL3909510	CHEMBL2835	JAK1	CHEMBL3667523	74.5	0.469	1	hitpick
CHEMBL3909510	CHEMBL2971	JAK2	CHEMBL2178801	60.5	0.41	2	hitpick
CHEMBL3909519	CHEMBL2835	JAK1	CHEMBL3667523	74.5	0.484	1	hitpick
CHEMBL3909519	CHEMBL2971	JAK2	CHEMBL2178801	60.5	0.425	2	hitpick
CHEMBL3909568	CHEMBL2835	JAK1	CHEMBL3667521	57.9	0.451	2	hitpick
CHEMBL3909785	CHEMBL2147	PIM1	SBSM37060	40.3	0.532	2	hitpick
CHEMBL3909947	CHEMBL2147	PIM1	CHEMBL3634783	7.4*	0.25	2	hitpick
CHEMBL3910228	CHEMBL4822	BACE1	CHEMBL2151181	74.5	0.4	1	hitpick
CHEMBL3910228	CHEMBL2525	BACE2	CHEMBL2151181	57.9	0.4	2	hitpick
CHEMBL3911037	CHEMBL1945	MTNR1A	CHEMBL3648352	97.4	0.703	1	hitpick
CHEMBL3911037	CHEMBL1946	MTNR1B	CHEMBL435586	57.9	0.488	2	hitpick
CHEMBL3911166	CHEMBL2835	JAK1	CHEMBL3667523	74.5	0.484	1	hitpick
CHEMBL3911166	CHEMBL2971	JAK2	CHEMBL2178801	60.5	0.413	2	hitpick
CHEMBL3911942	CHEMBL2835	JAK1	CHEMBL3667523	74.5	0.484	1	hitpick
CHEMBL3911942	CHEMBL2971	JAK2	CHEMBL2178801	60.5	0.424	2	hitpick
CHEMBL3912892	CHEMBL2835	JAK1	CHEMBL3667521	70.8*	0.455	1	hitpick
CHEMBL3912892	CHEMBL2971	JAK2	CHEMBL2178801	50.0*	0.347	3	hitpick
CHEMBL3912919	CHEMBL2835	JAK1	CHEMBL3667523	74.5	0.488	1	hitpick
CHEMBL3912919	CHEMBL2971	JAK2	CHEMBL2178801	60.5	0.429	2	hitpick
CHEMBL3913446	CHEMBL2147	PIM1	SBSM37060	28.5	0.495	3	hitpick
CHEMBL3913540	CHEMBL2147	PIM1	CHEMBL3685747	74.5	0.418	1	hitpick
CHEMBL3913540	CHEMBL4523	PIM2	CHEMBL3685747	60.5	0.418	2	hitpick
CHEMBL3913842	CHEMBL2835	JAK1	CHEMBL3667523	74.5	0.488	1	hitpick
CHEMBL3913842	CHEMBL2971	JAK2	CHEMBL2178801	60.5	0.429	2	hitpick
CHEMBL3914162	CHEMBL2835	JAK1	CHEMBL3667523	74.5	0.48	1	hitpick
CHEMBL3914162	CHEMBL2971	JAK2	CHEMBL2178801	60.5	0.41	2	hitpick
CHEMBL3914221	CHEMBL2835	JAK1	CHEMBL3667523	74.5	0.462	1	hitpick
CHEMBL3914221	CHEMBL2971	JAK2	CHEMBL2178801	60.5	0.403	2	hitpick
CHEMBL3914377	CHEMBL2835	JAK1	CHEMBL3667521	74.5	0.431	1	hitpick
CHEMBL3914438	CHEMBL2148	JAK3	CHEMBL1630766	26.7	0.396	6	hitpick
CHEMBL3914438	CHEMBL2835	JAK1	CHEMBL1630766	23.4	0.396	8	hitpick
CHEMBL3914475	CHEMBL2148	JAK3	CHEMBL3671810	98.5	0.811	1	hitpick
CHEMBL3914541	CHEMBL2835	JAK1	CHEMBL3667523	57.9	0.466	2	hitpick
CHEMBL3914582	CHEMBL4860	BCL2	CHEMBL217960	95.4	0.646	2	hitpick
CHEMBL3914582	CHEMBL4625	BCL2L1	CHEMBL217960	94.7	0.646	3	hitpick
CHEMBL3914623	CHEMBL2835	JAK1	CHEMBL3667522	74.5	0.468	1	hitpick
CHEMBL3914623	CHEMBL2971	JAK2	CHEMBL2178801	60.5	0.417	2	hitpick
CHEMBL3914629	CHEMBL1741195	TMPRSS15	CHEMBL3642961	74.5	0.49	1	hitpick
CHEMBL3914629	CHEMBL209	PRSS1	CHEMBL3642961	57.9	0.49	2	hitpick
CHEMBL3915323	CHEMBL2147	PIM1	CHEMBL3634782	39.1*	0.311	1	hitpick
CHEMBL3915560	CHEMBL2971	JAK2	CHEMBL2178801	60.5	0.427	2	hitpick
CHEMBL3915560	CHEMBL2835	JAK1	CHEMBL3667522	57.9	0.48	3	hitpick
CHEMBL3915865	CHEMBL2835	JAK1	CHEMBL3667523	74.5	0.492	1	hitpick
CHEMBL3915865	CHEMBL2971	JAK2	CHEMBL2178801	60.5	0.42	2	hitpick
CHEMBL3915913	CHEMBL2147	PIM1	CHEMBL3393698	35.7*	0.25	3	hitpick
CHEMBL3915913	CHEMBL5407	PIM3	CHEMBL3393698	16.0*	0.25	6	hitpick
CHEMBL3915926	CHEMBL2835	JAK1	CHEMBL3667523	74.5	0.462	1	hitpick
CHEMBL3915926	CHEMBL2971	JAK2	CHEMBL2178801	60.5	0.403	2	hitpick
CHEMBL3915972	CHEMBL2835	JAK1	CHEMBL3667523	74.5	0.484	1	hitpick
CHEMBL3915972	CHEMBL2971	JAK2	CHEMBL2178801	60.5	0.413	2	hitpick
CHEMBL3916122	CHEMBL233	OPRM1	SBSM539179	100	1	2	hitpick
CHEMBL3916122	CHEMBL237	OPRK1	CHEMBL3691853	95.4	0.636	3	hitpick
CHEMBL3916604	CHEMBL1741195	TMPRSS15	CHEMBL3642880	74.5	0.467	1	hitpick
CHEMBL3916604	CHEMBL209	PRSS1	CHEMBL3642880	57.9	0.467	2	hitpick
CHEMBL3916637	CHEMBL2835	JAK1	CHEMBL3667523	74.5	0.473	1	hitpick
CHEMBL3916637	CHEMBL2971	JAK2	CHEMBL2178801	60.5	0.415	2	hitpick
CHEMBL3916902	CHEMBL5407	PIM3	CHEMBL3634767	38.2	0.395	1	hitpick
CHEMBL3916902	CHEMBL2147	PIM1	CHEMBL3634767	36.5	0.395	2	hitpick
CHEMBL3916925	CHEMBL2835	JAK1	CHEMBL3667523	74.5	0.462	1	hitpick
CHEMBL3916961	CHEMBL1908	CYP11B1	CHEMBL446083	88.3	0.557	1	hitpick
CHEMBL3916961	CHEMBL2722	CYP11B2	CHEMBL446083	86.5	0.557	2	hitpick
CHEMBL3917077	CHEMBL2147	PIM1	CHEMBL3634783	14	0.318	7	hitpick
CHEMBL3917077	CHEMBL5407	PIM3	CHEMBL3634783	11.5	0.318	9	hitpick
CHEMBL3917434	CHEMBL3991	F7	SBSM37590	92.8	0.729	1	hitpick
CHEMBL3917854	CHEMBL2835	JAK1	CHEMBL3667521	59.4	0.437	2	hitpick
CHEMBL3917906	CHEMBL2835	JAK1	CHEMBL3658869	88.3	0.563	1	hitpick
CHEMBL3917906	CHEMBL2148	JAK3	CHEMBL3652388	70.8*	0.475	2	hitpick
CHEMBL3918076	CHEMBL2147	PIM1	CHEMBL3685749	52.3	0.369	1	hitpick
CHEMBL3918273	CHEMBL2147	PIM1	SBSM37349	69.1	0.711	1	hitpick
CHEMBL3918538	CHEMBL2835	JAK1	CHEMBL3667523	74.5	0.445	1	hitpick
CHEMBL3918755	CHEMBL224	HTR2A	CHEMBL3289975	58	0.483	2	hitpick
CHEMBL3919361	CHEMBL301	CDK2	CHEMBL3658038	10	0.263	10	hitpick
CHEMBL3919646	CHEMBL2147	PIM1	CHEMBL3685749	74.5	0.471	1	hitpick
CHEMBL3919646	CHEMBL4523	PIM2	CHEMBL3685749	57.9	0.471	3	hitpick
CHEMBL3919799	CHEMBL2148	JAK3	CHEMBL1630766	70.4	0.537	3	hitpick
CHEMBL3919848	CHEMBL1741195	TMPRSS15	CHEMBL3642953	95.4	0.617	1	hitpick
CHEMBL3919848	CHEMBL209	PRSS1	CHEMBL3642953	94.7	0.617	2	hitpick
CHEMBL3920142	CHEMBL2835	JAK1	CHEMBL3667523	88.3	0.54	1	hitpick
CHEMBL3920142	CHEMBL2971	JAK2	CHEMBL2178801	60.5	0.463	3	hitpick
CHEMBL3920252	CHEMBL217	DRD2	CHEMBL135387	95.4	0.684	1	hitpick
CHEMBL3920252	CHEMBL224	HTR2A	CHEMBL253233	85.9	0.527	2	hitpick
CHEMBL3920292	CHEMBL2835	JAK1	CHEMBL3667523	74.5	0.469	1	hitpick
CHEMBL3920292	CHEMBL2971	JAK2	CHEMBL2178801	60.5	0.4	2	hitpick
CHEMBL3920418	CHEMBL2835	JAK1	CHEMBL3702947	88.3	0.523	1	hitpick
CHEMBL3920418	CHEMBL2971	JAK2	CHEMBL3650683	36.5	0.398	2	hitpick
CHEMBL3920484	CHEMBL2835	JAK1	CHEMBL1630766	65.4	0.529	2	hitpick
CHEMBL3920484	CHEMBL2148	JAK3	CHEMBL1630766	63.6	0.529	3	hitpick
CHEMBL3920581	CHEMBL2148	JAK3	CHEMBL3652390	88.3	0.578	2	hitpick
CHEMBL3920600	CHEMBL2147	PIM1	SBSM37060	40.3	0.515	1	hitpick
CHEMBL3920627	CHEMBL1741195	TMPRSS15	CHEMBL3642898	88.3	0.541	1	hitpick
CHEMBL3920627	CHEMBL209	PRSS1	CHEMBL3642898	86.5	0.541	2	hitpick
CHEMBL3920681	CHEMBL2148	JAK3	CHEMBL3671816	97.4	0.779	1	hitpick
CHEMBL3920681	CHEMBL2835	JAK1	CHEMBL3667463	86.5	0.5	2	hitpick
CHEMBL3920824	CHEMBL2835	JAK1	CHEMBL3667523	74.5	0.473	1	hitpick
CHEMBL3920824	CHEMBL2971	JAK2	CHEMBL2178801	60.5	0.403	2	hitpick
CHEMBL3921546	CHEMBL2971	JAK2	CHEMBL2178801	60.5	0.407	2	hitpick
CHEMBL3921546	CHEMBL2835	JAK1	CHEMBL3667523	57.9	0.465	3	hitpick
CHEMBL3921881	CHEMBL2971	JAK2	CHEMBL2178801	74.5	0.403	1	hitpick
CHEMBL3921881	CHEMBL2835	JAK1	CHEMBL3667519	57.9	0.403	3	hitpick
CHEMBL3921976	CHEMBL2014	OPRL1	CHEMBL3326225	48.4	0.43	1	hitpick
CHEMBL3921976	CHEMBL233	OPRM1	CHEMBL3326221	46.1	0.41	2	hitpick
CHEMBL3922069	CHEMBL2835	JAK1	CHEMBL3699502	74.5	0.41	1	hitpick
CHEMBL3922782	CHEMBL2835	JAK1	CHEMBL3667523	74.5	0.484	1	hitpick
CHEMBL3922782	CHEMBL2971	JAK2	CHEMBL2178801	60.5	0.424	2	hitpick
CHEMBL3922831	CHEMBL2835	JAK1	CHEMBL3667523	74.5	0.469	1	hitpick
CHEMBL3922831	CHEMBL2971	JAK2	CHEMBL2178801	60.5	0.4	2	hitpick
CHEMBL3923240	CHEMBL224	HTR2A	CHEMBL3289975	84.6	0.512	2	hitpick
CHEMBL3923607	CHEMBL4860	BCL2	CHEMBL448740	95.4	0.664	1	hitpick
CHEMBL3923607	CHEMBL4625	BCL2L1	ABT-263	89.8	0.562	3	hitpick
CHEMBL3924226	CHEMBL2835	JAK1	CHEMBL3667522	88.3	0.542	1	hitpick
CHEMBL3924226	CHEMBL2971	JAK2	CHEMBL2178801	60.5	0.427	3	hitpick
CHEMBL3924451	CHEMBL2835	JAK1	CHEMBL3639663	74.5	0.469	1	hitpick
CHEMBL3924451	CHEMBL2971	JAK2	CHEMBL2178801	60.5	0.458	2	hitpick
CHEMBL3924903	CHEMBL5407	PIM3	CHEMBL3634783	8.4	0.239	1	hitpick
CHEMBL3924903	CHEMBL4523	PIM2	CHEMBL3634783	7.4*	0.239	2	hitpick
CHEMBL3925403	CHEMBL5407	PIM3	CHEMBL3634771	0.0*	0.281	7	hitpick
CHEMBL3925403	CHEMBL2147	PIM1	CHEMBL3634771	0.0*	0.281	8	hitpick
CHEMBL3925605	CHEMBL2148	JAK3	CHEMBL1630766	63.6	0.529	3	hitpick
CHEMBL3925919	CHEMBL2835	JAK1	CHEMBL3667522	74.5	0.484	1	hitpick
CHEMBL3925919	CHEMBL2971	JAK2	CHEMBL2178801	60.5	0.41	2	hitpick
CHEMBL3925958	CHEMBL2835	JAK1	CHEMBL3667521	70.8*	0.44	1	hitpick
CHEMBL3925958	CHEMBL2971	JAK2	CHEMBL2178801	50.0*	0.336	3	hitpick
CHEMBL3926007	CHEMBL2147	PIM1	CHEMBL3634783	0.0*	0.243	10	hitpick
CHEMBL3926009	CHEMBL2835	JAK1	CHEMBL3667521	57.9	0.458	2	hitpick
CHEMBL3926059	CHEMBL2148	JAK3	CHEMBL3652392	95.4	0.607	1	hitpick
CHEMBL3926308	CHEMBL2971	JAK2	CHEMBL2178801	60.5	0.407	2	hitpick
CHEMBL3926308	CHEMBL2835	JAK1	CHEMBL3667523	57.9	0.465	3	hitpick
CHEMBL3926620	CHEMBL2147	PIM1	SBSM37349	42.9	0.738	2	hitpick
CHEMBL3926930	CHEMBL2148	JAK3	CHEMBL1630766	88.3	0.522	1	hitpick
CHEMBL3927136	CHEMBL237	OPRK1	Diprenorphine	91	0.702	1	hitpick
CHEMBL3927136	CHEMBL233	OPRM1	Diprenorphine	77.6	0.702	3	hitpick
CHEMBL3927535	CHEMBL2835	JAK1	CHEMBL3667528	16.1	0.216	6	hitpick
CHEMBL3927952	CHEMBL5407	PIM3	CHEMBL3634783	0.0*	0.281	6	hitpick
CHEMBL3927952	CHEMBL4523	PIM2	CHEMBL3634783	0.0*	0.281	7	hitpick
CHEMBL3928129	CHEMBL2835	JAK1	CHEMBL3658869	88.3	0.527	1	hitpick
CHEMBL3928249	CHEMBL2971	JAK2	CHEMBL2178801	74.5	0.438	1	hitpick
CHEMBL3928249	CHEMBL2835	JAK1	CHEMBL3639663	57.9	0.437	3	hitpick
CHEMBL3928595	CHEMBL2147	PIM1	SBSM37060	40.3	0.598	3	hitpick
CHEMBL3929011	CHEMBL5407	PIM3	CHEMBL3634783	35.7*	0.217	2	hitpick
CHEMBL3929011	CHEMBL4523	PIM2	CHEMBL3634783	16.1	0.217	6	hitpick
CHEMBL3929011	CHEMBL2147	PIM1	CHEMBL3634783	0.0*	0.217	10	hitpick
CHEMBL3929168	CHEMBL217	DRD2	CHEMBL3642691	88.3	0.598	1	hitpick
CHEMBL3929168	CHEMBL234	DRD3	CHEMBL309623	65.4	0.579	2	hitpick
CHEMBL3929264	CHEMBL2147	PIM1	CHEMBL3634767	46.1	0.413	2	hitpick
CHEMBL3929264	CHEMBL5407	PIM3	CHEMBL3634767	43.5	0.413	3	hitpick
CHEMBL3929534	CHEMBL1741195	TMPRSS15	CHEMBL3642898	88.3	0.537	1	hitpick
CHEMBL3929534	CHEMBL209	PRSS1	CHEMBL3642898	86.5	0.537	2	hitpick
CHEMBL3929573	CHEMBL2835	JAK1	CHEMBL3667522	88.3	0.557	1	hitpick
CHEMBL3929573	CHEMBL2971	JAK2	CHEMBL2178801	60.5	0.439	3	hitpick
CHEMBL3929734	CHEMBL2835	JAK1	CHEMBL3667523	74.5	0.462	1	hitpick
CHEMBL3929734	CHEMBL2971	JAK2	CHEMBL2178801	60.5	0.403	2	hitpick
CHEMBL3930290	CHEMBL2148	JAK3	CHEMBL1630766	13.5	0.486	10	hitpick
CHEMBL3930305	CHEMBL2835	JAK1	CHEMBL3658869	88.3	0.516	1	hitpick
CHEMBL3930515	CHEMBL1908	CYP11B1	CHEMBL457856	88.3	0.575	1	hitpick
CHEMBL3930515	CHEMBL2722	CYP11B2	CHEMBL457856	86.5	0.575	3	hitpick
CHEMBL3930620	CHEMBL325	HDAC1	CHEMBL3339019	86.5	0.539	3	hitpick
CHEMBL3930712	CHEMBL2148	JAK3	CHEMBL3671811	97.4	0.792	1	hitpick
CHEMBL3931150	CHEMBL2835	JAK1	CHEMBL3699504	74.5	0.454	1	hitpick
CHEMBL3931274	CHEMBL5407	PIM3	CHEMBL3634783	8.4	0.25	3	hitpick
CHEMBL3931278	CHEMBL2835	JAK1	CHEMBL3667523	88.3	0.5	1	hitpick
CHEMBL3931278	CHEMBL2971	JAK2	CHEMBL2178801	60.5	0.439	3	hitpick
CHEMBL3931279	CHEMBL5407	PIM3	CHEMBL3634768	7.6*	0.283	1	hitpick
CHEMBL3931279	CHEMBL2147	PIM1	CHEMBL3634768	25.0*	0.283	3	hitpick
CHEMBL3931819	CHEMBL2835	JAK1	CHEMBL3667523	74.5	0.462	1	hitpick
CHEMBL3932460	CHEMBL2147	PIM1	CHEMBL3685747	74.5	0.418	1	hitpick
CHEMBL3932460	CHEMBL4523	PIM2	CHEMBL3685747	60.5	0.418	2	hitpick
CHEMBL3932623	CHEMBL2971	JAK2	CHEMBL2178801	60.5	0.429	2	hitpick
CHEMBL3932623	CHEMBL2835	JAK1	CHEMBL3667523	57.9	0.488	3	hitpick
CHEMBL3932881	CHEMBL2835	JAK1	CHEMBL3667523	74.5	0.484	1	hitpick
CHEMBL3932881	CHEMBL2971	JAK2	CHEMBL2178801	60.5	0.424	2	hitpick
CHEMBL3933719	CHEMBL2147	PIM1	SBSM37349	20	0.304	3	hitpick
CHEMBL3933766	CHEMBL2835	JAK1	CHEMBL3639663	74.5	0.4	1	hitpick
CHEMBL3933868	CHEMBL5407	PIM3	CHEMBL3634783	11.5	0.355	7	hitpick
CHEMBL3934335	CHEMBL2835	JAK1	CHEMBL3667521	59.4	0.456	2	hitpick
CHEMBL3934709	CHEMBL2835	JAK1	CHEMBL3667523	95.4	0.63	1	hitpick
CHEMBL3934709	CHEMBL2971	JAK2	CHEMBL2178801	60.5	0.455	3	hitpick
CHEMBL3934942	CHEMBL2148	JAK3	CHEMBL1630766	74.5	0.486	1	hitpick
CHEMBL3934963	CHEMBL2835	JAK1	CHEMBL3667521	57.9	0.433	2	hitpick
CHEMBL3935018	CHEMBL5407	PIM3	CHEMBL3393722	35.7*	0.267	3	hitpick
CHEMBL3935018	CHEMBL2147	PIM1	CHEMBL3393722	16.1	0.267	6	hitpick
CHEMBL3935096	CHEMBL4523	PIM2	CHEMBL3634758	30.3	0.301	2	hitpick
CHEMBL3935096	CHEMBL2147	PIM1	CHEMBL3634758	23.2	0.301	3	hitpick
CHEMBL3935178	CHEMBL2835	JAK1	CHEMBL3699504	74.5	0.469	1	hitpick
CHEMBL3935396	CHEMBL2971	JAK2	CHEMBL2178801	74.5	0.434	1	hitpick
CHEMBL3935396	CHEMBL2835	JAK1	CHEMBL3639663	57.9	0.433	3	hitpick
CHEMBL3936320	CHEMBL2147	PIM1	CHEMBL3685747	52.3	0.379	2	hitpick
CHEMBL3936541	CHEMBL2835	JAK1	CHEMBL3667521	57.9	0.458	2	hitpick
CHEMBL3936541	CHEMBL2971	JAK2	CHEMBL2178801	50.0*	0.35	3	hitpick
CHEMBL3936992	CHEMBL2147	PIM1	CHEMBL3685738	52.3	0.328	1	hitpick
CHEMBL3936992	CHEMBL4523	PIM2	CHEMBL3685738	33.3*	0.328	3	hitpick
CHEMBL3937034	CHEMBL2147	PIM1	CHEMBL3634770	45.4*	0.364	2	hitpick
CHEMBL3937195	CHEMBL2835	JAK1	CHEMBL3667523	74.5	0.462	1	hitpick
CHEMBL3937204	CHEMBL2148	JAK3	CHEMBL1630766	88.3	0.522	1	hitpick
CHEMBL3937222	CHEMBL1741195	TMPRSS15	CHEMBL3672867	98.5	0.835	1	hitpick
CHEMBL3937222	CHEMBL209	PRSS1	CHEMBL3672867	97.9	0.835	2	hitpick
CHEMBL3937835	CHEMBL2148	JAK3	CHEMBL1630766	88.3	0.5	1	hitpick
CHEMBL3937835	CHEMBL2835	JAK1	CHEMBL1630766	86.5	0.5	2	hitpick
CHEMBL3937878	CHEMBL2835	JAK1	CHEMBL3667521	59.4	0.448	2	hitpick
CHEMBL3937898	CHEMBL2835	JAK1	CHEMBL3667523	74.5	0.48	1	hitpick
CHEMBL3937898	CHEMBL2971	JAK2	CHEMBL2178801	60.5	0.41	2	hitpick
CHEMBL3937927	CHEMBL2835	JAK1	CHEMBL3667521	74.5	0.451	1	hitpick
CHEMBL3937972	CHEMBL3650	FGFR1	SBSM37079	29.6	0.609	2	hitpick
CHEMBL3938031	CHEMBL2835	JAK1	CHEMBL3699528	52.3	0.308	1	hitpick
CHEMBL3938210	CHEMBL224	HTR2A	CHEMBL3289975	58	0.473	2	hitpick
CHEMBL3938210	CHEMBL214	HTR1A	CHEMBL3235740	50	0.467	3	hitpick
CHEMBL3938210	CHEMBL234	DRD3	CHEMBL78406	42	0.462	7	hitpick
CHEMBL3938583	CHEMBL5407	PIM3	CHEMBL3634761	38.2	0.374	1	hitpick
CHEMBL3938583	CHEMBL2147	PIM1	CHEMBL3634761	36.5	0.374	2	hitpick
CHEMBL3938660	CHEMBL2835	JAK1	CHEMBL3667521	74.5	0.462	1	hitpick
CHEMBL3938720	CHEMBL2835	JAK1	CHEMBL3667523	74.5	0.48	1	hitpick
CHEMBL3938720	CHEMBL2971	JAK2	CHEMBL2178801	60.5	0.42	2	hitpick
CHEMBL3939101	CHEMBL2147	PIM1	CHEMBL3634782	21.4	0.314	7	hitpick
CHEMBL3939394	CHEMBL2147	PIM1	CHEMBL3634782	21.4	0.38	7	hitpick
CHEMBL3939580	CHEMBL2148	JAK3	CHEMBL3672458	74.5	0.453	1	hitpick
CHEMBL3939580	CHEMBL2835	JAK1	CHEMBL3672458	57.9	0.453	2	hitpick
CHEMBL3939892	CHEMBL2835	JAK1	CHEMBL3667522	88.3	0.5	1	hitpick
CHEMBL3939892	CHEMBL2971	JAK2	CHEMBL2178801	60.5	0.446	3	hitpick
CHEMBL3940091	CHEMBL2147	PIM1	SBSM37349	53.8	0.843	1	hitpick
CHEMBL3940227	CHEMBL5407	PIM3	CHEMBL3634767	38.2	0.388	1	hitpick
CHEMBL3940227	CHEMBL2147	PIM1	CHEMBL3634767	36.5	0.388	2	hitpick
CHEMBL3940389	CHEMBL2147	PIM1	SBSM35870	98.5	0.8	1	hitpick
CHEMBL3940712	CHEMBL224	HTR2A	CHEMBL3289967	60.5	0.495	3	hitpick
CHEMBL3940744	CHEMBL5407	PIM3	CHEMBL3634760	8.4	0.283	1	hitpick
CHEMBL3940744	CHEMBL4523	PIM2	CHEMBL3634760	7.4*	0.283	2	hitpick
CHEMBL3940929	CHEMBL2835	JAK1	CHEMBL3667523	74.5	0.48	1	hitpick
CHEMBL3940929	CHEMBL2971	JAK2	CHEMBL2178801	60.5	0.42	2	hitpick
CHEMBL3941202	CHEMBL2835	JAK1	CHEMBL3699517	74.5	0.494	1	hitpick
CHEMBL3941202	CHEMBL2971	JAK2	CHEMBL3650683	36.9	0.4	3	hitpick
CHEMBL3941211	CHEMBL2148	JAK3	CHEMBL1630766	88.3	0.522	1	hitpick
CHEMBL3942104	CHEMBL2147	PIM1	CHEMBL3634771	50.0*	0.283	1	hitpick
CHEMBL3942104	CHEMBL5407	PIM3	CHEMBL3634771	0.0*	0.283	7	hitpick
CHEMBL3942446	CHEMBL5407	PIM3	CHEMBL3634767	38.2	0.395	1	hitpick
CHEMBL3942446	CHEMBL2147	PIM1	CHEMBL3634767	36.5	0.395	2	hitpick
CHEMBL3942542	CHEMBL2835	JAK1	CHEMBL3667521	74.5	0.42	1	hitpick
CHEMBL3942619	CHEMBL262	GSK3B	CHEMBL2177160	30.3	0.379	3	hitpick
CHEMBL3943096	CHEMBL1741195	TMPRSS15	CHEMBL3642954	97.4	0.722	1	hitpick
CHEMBL3943096	CHEMBL209	PRSS1	CHEMBL3642954	96.7	0.722	2	hitpick
CHEMBL3943705	CHEMBL4523	PIM2	CHEMBL3634783	30.3	0.319	3	hitpick
CHEMBL3943759	CHEMBL5407	PIM3	CHEMBL3634783	38.2	0.308	3	hitpick
CHEMBL3944136	CHEMBL2147	PIM1	SBSM37349	23.0*	0.25	3	hitpick
CHEMBL3945832	CHEMBL2973	ROCK2	CHEMBL480585	27.2*	0.348	2	hitpick
CHEMBL3946152	CHEMBL2147	PIM1	SBSM37349	42.9	0.724	1	hitpick
CHEMBL3946306	CHEMBL2147	PIM1	CHEMBL3634783	26.7	0.308	2	hitpick
CHEMBL3946306	CHEMBL5407	PIM3	CHEMBL3634783	26.3	0.308	3	hitpick
CHEMBL3946995	CHEMBL234	DRD3	CHEMBL78406	96.7	0.711	2	hitpick
CHEMBL3947292	CHEMBL2835	JAK1	CHEMBL3647845	74.5	0.452	1	hitpick
CHEMBL3947456	CHEMBL2835	JAK1	CHEMBL3667523	88.3	0.517	1	hitpick
CHEMBL3947456	CHEMBL2971	JAK2	CHEMBL2178801	60.5	0.442	3	hitpick
CHEMBL3947540	CHEMBL2835	JAK1	CHEMBL3702977	88.3	0.538	2	hitpick
CHEMBL3947770	CHEMBL2147	PIM1	CHEMBL3634769	40.6	0.471	1	hitpick
CHEMBL3947977	CHEMBL2835	JAK1	CHEMBL3667523	70.8*	0.465	1	hitpick
CHEMBL3947977	CHEMBL2971	JAK2	CHEMBL2178801	56.2	0.407	3	hitpick
CHEMBL3948039	CHEMBL2835	JAK1	CHEMBL3667525	52.3	0.393	1	hitpick
CHEMBL3948056	CHEMBL217	DRD2	CHEMBL3289967	95.4	0.602	2	hitpick
CHEMBL3948591	CHEMBL2835	JAK1	CHEMBL3667523	74.5	0.459	1	hitpick
CHEMBL3948713	CHEMBL233	OPRM1	CHEMBL3695667	97.4	0.768	1	hitpick
CHEMBL3948713	CHEMBL237	OPRK1	Cyclorphan,(-)	94.7	0.657	2	hitpick
CHEMBL3948854	CHEMBL4860	BCL2	CHEMBL3650489	74.5	0.497	2	hitpick
CHEMBL3949102	CHEMBL2147	PIM1	SBSM37060	7.6*	0.246	2	hitpick
CHEMBL3949136	CHEMBL2973	ROCK2	CHEMBL2332060	52.3	0.328	2	hitpick
CHEMBL3949136	CHEMBL3231	ROCK1	CHEMBL2332060	34.7*	0.328	3	hitpick
CHEMBL3949274	CHEMBL2147	PIM1	CHEMBL3634783	20	0.358	3	hitpick
CHEMBL3949310	CHEMBL2835	JAK1	CHEMBL3702904	98.5	0.821	1	hitpick
CHEMBL3949310	CHEMBL2971	JAK2	CHEMBL3650683	50.7	0.548	2	hitpick
CHEMBL3949394	CHEMBL2835	JAK1	CHEMBL3667521	59.4	0.422	2	hitpick
CHEMBL3950143	CHEMBL2971	JAK2	CHEMBL2178801	66.6*	0.336	2	hitpick
CHEMBL3950143	CHEMBL2835	JAK1	CHEMBL3667521	59.4	0.44	3	hitpick
CHEMBL3950269	CHEMBL5407	PIM3	CHEMBL3634783		0.292	1	hitpick
CHEMBL3950269	CHEMBL2147	PIM1	CHEMBL3634783	50.0*	0.292	2	hitpick
CHEMBL3950981	CHEMBL2835	JAK1	CHEMBL3667523	74.5	0.477	1	hitpick
CHEMBL3950981	CHEMBL2971	JAK2	CHEMBL2178801	60.5	0.407	2	hitpick
CHEMBL3951001	CHEMBL1741195	TMPRSS15	CHEMBL3642880	74.5	0.467	1	hitpick
CHEMBL3951001	CHEMBL209	PRSS1	CHEMBL3642880	57.9	0.467	2	hitpick
CHEMBL3951178	CHEMBL2835	JAK1	CHEMBL1630766	57.9	0.48	3	hitpick
CHEMBL3951198	CHEMBL1741195	TMPRSS15	CHEMBL3672890	95.4	0.667	1	hitpick
CHEMBL3951198	CHEMBL209	PRSS1	CHEMBL3672890	94.7	0.667	2	hitpick
CHEMBL3951741	CHEMBL5407	PIM3	CHEMBL3634783	38.2	0.315	1	hitpick
CHEMBL3951874	CHEMBL2971	JAK2	CHEMBL2178801	60.5	0.41	2	hitpick
CHEMBL3951874	CHEMBL2835	JAK1	CHEMBL3667523	57.9	0.469	3	hitpick
CHEMBL3951947	CHEMBL2835	JAK1	CHEMBL3667523	74.5	0.449	1	hitpick
CHEMBL3952022	CHEMBL2835	JAK1	CHEMBL3667519	70.8*	0.435	1	hitpick
CHEMBL3952022	CHEMBL2971	JAK2	CHEMBL2178801	56.2	0.435	3	hitpick
CHEMBL3952029	CHEMBL2835	JAK1	CHEMBL3667523	74.5	0.492	1	hitpick
CHEMBL3952029	CHEMBL2971	JAK2	CHEMBL2178801	60.5	0.42	2	hitpick
CHEMBL3952555	CHEMBL2148	JAK3	CHEMBL1630766	88.3	0.514	1	hitpick
CHEMBL3952845	CHEMBL2147	PIM1	CHEMBL3634758	21.4	0.302	3	hitpick
CHEMBL3953164	CHEMBL2147	PIM1	CHEMBL3393722	7.6*	0.293	1	hitpick
CHEMBL3953164	CHEMBL4523	PIM2	CHEMBL3393722	7.4*	0.293	2	hitpick
CHEMBL3953482	CHEMBL2147	PIM1	CHEMBL3634767	36.9	0.417	2	hitpick
CHEMBL3953482	CHEMBL5407	PIM3	CHEMBL3634767	28.5	0.417	3	hitpick
CHEMBL3953947	CHEMBL2835	JAK1	CHEMBL3667523	74.5	0.492	1	hitpick
CHEMBL3953947	CHEMBL2971	JAK2	CHEMBL2178801	60.5	0.42	2	hitpick
CHEMBL3954558	CHEMBL2148	JAK3	CHEMBL1630766	93.4	0.61	2	hitpick
CHEMBL3954782	CHEMBL237	OPRK1	CHEMBL3691854	97.4	0.708	1	hitpick
CHEMBL3954782	CHEMBL236	OPRD1	CHEMBL3691854	96.7	0.708	2	hitpick
CHEMBL3954782	CHEMBL233	OPRM1	CHEMBL3691854	94	0.708	3	hitpick
CHEMBL3955757	CHEMBL2148	JAK3	CHEMBL1630766	88.3	0.569	1	hitpick
CHEMBL3955880	CHEMBL2147	PIM1	SBSM37060	40.3	0.515	1	hitpick
CHEMBL3956075	CHEMBL2835	JAK1	CHEMBL3667523	88.3	0.508	1	hitpick
CHEMBL3956075	CHEMBL2971	JAK2	CHEMBL2178801	60.5	0.435	3	hitpick
CHEMBL3956152	CHEMBL2835	JAK1	CHEMBL3667525	52.3	0.383	1	hitpick
CHEMBL3956155	CHEMBL5407	PIM3	CHEMBL3634782	38.2	0.316	1	hitpick
CHEMBL3956155	CHEMBL2147	PIM1	CHEMBL3634782	36.5	0.316	2	hitpick
CHEMBL3956440	CHEMBL5407	PIM3	CHEMBL3634767	38.2	0.388	1	hitpick
CHEMBL3956440	CHEMBL2147	PIM1	CHEMBL3634767	36.5	0.388	2	hitpick
CHEMBL3956628	CHEMBL2835	JAK1	CHEMBL3667523	74.5	0.458	1	hitpick
CHEMBL3956628	CHEMBL2971	JAK2	CHEMBL2178801	60.5	0.4	2	hitpick
CHEMBL3956651	CHEMBL2835	JAK1	CHEMBL3667523	74.5	0.477	1	hitpick
CHEMBL3956651	CHEMBL2971	JAK2	CHEMBL2178801	60.5	0.407	2	hitpick
CHEMBL3956717	CHEMBL2147	PIM1	CHEMBL3634783	39.1*	0.319	3	hitpick
CHEMBL3956720	CHEMBL217	DRD2	CHEMBL3642691	85.8	0.628	1	hitpick
CHEMBL3957073	CHEMBL2147	PIM1	SBSM37060	40.3	0.543	2	hitpick
CHEMBL3957106	CHEMBL1741195	TMPRSS15	CHEMBL3642978	88.3	0.538	1	hitpick
CHEMBL3957106	CHEMBL209	PRSS1	CHEMBL3642978	86.5	0.538	2	hitpick
CHEMBL3957132	CHEMBL2835	JAK1	CHEMBL3667523	74.5	0.455	1	hitpick
CHEMBL3957195	CHEMBL2835	JAK1	CHEMBL3667523	74.5	0.477	1	hitpick
CHEMBL3957195	CHEMBL2971	JAK2	CHEMBL2178801	60.5	0.407	2	hitpick
CHEMBL3957231	CHEMBL2971	JAK2	CHEMBL2178801	74.5	0.455	1	hitpick
CHEMBL3957231	CHEMBL2835	JAK1	CHEMBL3639663	57.9	0.453	3	hitpick
CHEMBL3958691	CHEMBL2835	JAK1	CHEMBL3667523	74.5	0.459	1	hitpick
CHEMBL3958862	CHEMBL2147	PIM1	SBSM37349	42.9	0.74	3	hitpick
CHEMBL3959005	CHEMBL2835	JAK1	CHEMBL3699483	88.3	0.527	1	hitpick
CHEMBL3959091	CHEMBL2147	PIM1	CHEMBL3634767	27.2	0.314	2	hitpick
CHEMBL3959091	CHEMBL4523	PIM2	CHEMBL3634767	22.4	0.314	3	hitpick
CHEMBL3959266	CHEMBL2835	JAK1	CHEMBL3667523	74.5	0.458	1	hitpick
CHEMBL3959266	CHEMBL2971	JAK2	CHEMBL2178801	60.5	0.4	2	hitpick
CHEMBL3959358	CHEMBL2835	JAK1	CHEMBL1630766	78.4	0.514	1	hitpick
CHEMBL3959398	CHEMBL233	OPRM1	CHEMBL3326224	98.3	0.983	2	hitpick
CHEMBL3959433	CHEMBL2835	JAK1	CHEMBL3647845	74.5	0.452	1	hitpick
CHEMBL3959770	CHEMBL2835	JAK1	CHEMBL1630766	65.4	0.529	2	hitpick
CHEMBL3959924	CHEMBL2835	JAK1	CHEMBL3667521	74.5	0.455	1	hitpick
CHEMBL3960416	CHEMBL2148	JAK3	CHEMBL1630766	88.3	0.529	2	hitpick
CHEMBL3960785	CHEMBL217	DRD2	CHEMBL3642691	78	0.568	1	hitpick
CHEMBL3961393	CHEMBL2835	JAK1	CHEMBL3667523	57.9	0.452	2	hitpick
CHEMBL3961525	CHEMBL2147	PIM1	CHEMBL3634761	46.1	0.444	2	hitpick
CHEMBL3961525	CHEMBL5407	PIM3	CHEMBL3634761	43.5	0.444	3	hitpick
CHEMBL3961670	CHEMBL2835	JAK1	CHEMBL1630766	86.5	0.571	3	hitpick
CHEMBL3961692	CHEMBL5407	PIM3	CHEMBL3634767	27.2	0.319	2	hitpick
CHEMBL3961850	CHEMBL2148	JAK3	CHEMBL1630766	88.3	0.514	1	hitpick
CHEMBL3962064	CHEMBL2147	PIM1	SBSM37349	28.5	0.402	3	hitpick
CHEMBL3962342	CHEMBL2835	JAK1	CHEMBL3667523	74.5	0.476	1	hitpick
CHEMBL3962342	CHEMBL2971	JAK2	CHEMBL2178801	60.5	0.417	2	hitpick
CHEMBL3962386	CHEMBL2835	JAK1	CHEMBL3699528	74.5	0.464	1	hitpick
CHEMBL3962386	CHEMBL2971	JAK2	CHEMBL3650683	46.1	0.414	2	hitpick
CHEMBL3962448	CHEMBL2148	JAK3	CHEMBL1630766	74.5	0.474	1	hitpick
CHEMBL3962506	CHEMBL2835	JAK1	CHEMBL3702907	98.5	0.827	1	hitpick
CHEMBL3962506	CHEMBL2971	JAK2	CHEMBL3650683	50.7	0.529	2	hitpick
CHEMBL3963191	CHEMBL2835	JAK1	CHEMBL3667523	74.5	0.48	1	hitpick
CHEMBL3963191	CHEMBL2971	JAK2	CHEMBL2178801	60.5	0.41	2	hitpick
CHEMBL3963271	CHEMBL2835	JAK1	CHEMBL3667523	88.3	0.521	1	hitpick
CHEMBL3963271	CHEMBL2971	JAK2	CHEMBL2178801	60.5	0.446	3	hitpick
CHEMBL3963779	CHEMBL2971	JAK2	CHEMBL2178801	66.6*	0.321	2	hitpick
CHEMBL3963779	CHEMBL2835	JAK1	CHEMBL3667521	59.4	0.42	3	hitpick
CHEMBL3963946	CHEMBL2147	PIM1	CHEMBL3634758	27.2*	0.396	3	hitpick
CHEMBL3964279	CHEMBL2835	JAK1	CHEMBL3667521	57.9	0.462	2	hitpick
CHEMBL3964367	CHEMBL2147	PIM1	SBSM37060	7.6*	0.25	1	hitpick
CHEMBL3964598	CHEMBL237	OPRK1	CHEMBL376355	89.8	0.589	1	hitpick
CHEMBL3964598	CHEMBL233	OPRM1	CHEMBL376355	88.3	0.589	2	hitpick
CHEMBL3964801	CHEMBL2835	JAK1	CHEMBL3667523	74.5	0.477	1	hitpick
CHEMBL3964801	CHEMBL2971	JAK2	CHEMBL2178801	60.5	0.407	2	hitpick
CHEMBL3964990	CHEMBL2835	JAK1	CHEMBL3667523	74.5	0.476	1	hitpick
CHEMBL3964990	CHEMBL2971	JAK2	CHEMBL2178801	60.5	0.417	2	hitpick
CHEMBL3965069	CHEMBL1741195	TMPRSS15	CHEMBL3642964	88.3	0.51	1	hitpick
CHEMBL3965069	CHEMBL209	PRSS1	CHEMBL3642964	86.5	0.51	2	hitpick
CHEMBL3965297	CHEMBL2147	PIM1	CHEMBL3685738	74.5	0.42	1	hitpick
CHEMBL3965297	CHEMBL4523	PIM2	CHEMBL3685738	60.5	0.42	2	hitpick
CHEMBL3965713	CHEMBL2971	JAK2	CHEMBL1630789	58.8*	0.458	2	hitpick
CHEMBL3965713	CHEMBL2835	JAK1	CHEMBL1630766	57.9	0.474	3	hitpick
CHEMBL3965757	CHEMBL2147	PIM1	CHEMBL3685737	52.3	0.372	1	hitpick
CHEMBL3965809	CHEMBL2971	JAK2	CHEMBL2178265	60.5	0.434	2	hitpick
CHEMBL3965809	CHEMBL2835	JAK1	CHEMBL3667523	57.9	0.465	3	hitpick
CHEMBL3965946	CHEMBL2147	PIM1	CHEMBL3685747	74.5	0.481	3	hitpick
CHEMBL3966363	CHEMBL2147	PIM1	SBSM37060	40.3	0.598	3	hitpick
CHEMBL3966732	CHEMBL2147	PIM1	CHEMBL3685738	74.5	0.42	1	hitpick
CHEMBL3966732	CHEMBL4523	PIM2	CHEMBL3685738	60.5	0.42	2	hitpick
CHEMBL3966806	CHEMBL4282	AKT1	CHEMBL3127378	38.2	0.308	2	hitpick
CHEMBL3966830	CHEMBL233	OPRM1	CHEMBL3672571	95.4	0.687	1	hitpick
CHEMBL3966830	CHEMBL237	OPRK1	CHEMBL3672571	94.7	0.687	2	hitpick
CHEMBL3966842	CHEMBL217	DRD2	CHEMBL3289975	96.7	0.701	2	hitpick
CHEMBL3967830	CHEMBL2835	JAK1	CHEMBL3667523	74.5	0.473	1	hitpick
CHEMBL3967830	CHEMBL2971	JAK2	CHEMBL2178801	60.5	0.403	2	hitpick
CHEMBL3968206	CHEMBL2147	PIM1	CHEMBL3634761	52.3	0.374	1	hitpick
CHEMBL3968315	CHEMBL2835	JAK1	CHEMBL3667523	88.3	0.53	1	hitpick
CHEMBL3968315	CHEMBL2971	JAK2	CHEMBL2178801	60.5	0.455	3	hitpick
CHEMBL3968781	CHEMBL2835	JAK1	CHEMBL3667523	88.3	0.521	1	hitpick
CHEMBL3968781	CHEMBL2971	JAK2	CHEMBL2178801	60.5	0.446	3	hitpick
CHEMBL3968925	CHEMBL4005	PIK3CA	CHEMBL3577908	97.4	0.745	1	hitpick
CHEMBL3968925	CHEMBL3267	PIK3CG	CHEMBL1236962	94.5	0.722	3	hitpick
CHEMBL3969155	CHEMBL233	OPRM1	CHEMBL3691865	91.7	0.732	1	hitpick
CHEMBL3969155	CHEMBL237	OPRK1	CHEMBL3691865	89.6	0.732	3	hitpick
CHEMBL3969253	CHEMBL2835	JAK1	CHEMBL3667521	70.8*	0.433	2	hitpick
CHEMBL3969253	CHEMBL2971	JAK2	CHEMBL2178801	50.0*	0.347	3	hitpick
CHEMBL3970360	CHEMBL2835	JAK1	CHEMBL3667523	74.5	0.462	1	hitpick
CHEMBL3970779	CHEMBL2835	JAK1	CHEMBL3667523	74.5	0.484	1	hitpick
CHEMBL3970779	CHEMBL2971	JAK2	CHEMBL2178801	60.5	0.413	2	hitpick
CHEMBL3970981	CHEMBL2147	PIM1	CHEMBL3634771	46.1	0.411	2	hitpick
CHEMBL3970981	CHEMBL5407	PIM3	CHEMBL3634771	43.5	0.411	3	hitpick
CHEMBL3970998	CHEMBL2835	JAK1	CHEMBL3667521	57.9	0.423	2	hitpick
CHEMBL3971083	CHEMBL2835	JAK1	CHEMBL3667525	88.3	0.518	1	hitpick
CHEMBL3971083	CHEMBL2971	JAK2	CHEMBL2178801	60.5	0.476	3	hitpick
CHEMBL3971342	CHEMBL2147	PIM1	SBSM37060	7.6*	0.25	1	hitpick
CHEMBL3971538	CHEMBL1945	MTNR1A	CHEMBL3648353	95.4	0.651	1	hitpick
CHEMBL3971538	CHEMBL1946	MTNR1B	CHEMBL127596	57.9	0.403	2	hitpick
CHEMBL3971672	CHEMBL2835	JAK1	CHEMBL3667523	74.5	0.48	1	hitpick
CHEMBL3971672	CHEMBL2971	JAK2	CHEMBL2178801	60.5	0.41	2	hitpick
CHEMBL3971907	CHEMBL217	DRD2	CHEMBL3642753	88.3	0.565	1	hitpick
CHEMBL3972050	CHEMBL5407	PIM3	CHEMBL3634767	38.2	0.395	1	hitpick
CHEMBL3972050	CHEMBL2147	PIM1	CHEMBL3634767	36.5	0.395	2	hitpick
CHEMBL3972612	CHEMBL2835	JAK1	CHEMBL3667523	74.5	0.488	1	hitpick
CHEMBL3972612	CHEMBL2971	JAK2	CHEMBL2178801	60.5	0.418	2	hitpick
CHEMBL3972830	CHEMBL2835	JAK1	CHEMBL3667523	57.9	0.462	2	hitpick
CHEMBL3973487	CHEMBL214	HTR1A	CHEMBL3235740	59.8	0.557	3	hitpick
CHEMBL3973547	CHEMBL2835	JAK1	CHEMBL3667523	74.5	0.488	1	hitpick
CHEMBL3973547	CHEMBL2971	JAK2	CHEMBL2178801	60.5	0.417	2	hitpick
CHEMBL3974543	CHEMBL2147	PIM1	SBSM37060	40.3	0.544	1	hitpick
CHEMBL3974857	CHEMBL237	OPRK1	Diprenorphine	82.3	0.736	2	hitpick
CHEMBL3975046	CHEMBL2835	JAK1	CHEMBL3702953	98.5	0.811	1	hitpick
CHEMBL3975046	CHEMBL2971	JAK2	CHEMBL3650684	66.5	0.642	2	hitpick
CHEMBL3975198	CHEMBL5407	PIM3	CHEMBL3634783		0.292	1	hitpick
CHEMBL3975198	CHEMBL2147	PIM1	CHEMBL3634783	50.0*	0.292	2	hitpick
CHEMBL3975506	CHEMBL2835	JAK1	CHEMBL3667523	74.5	0.48	1	hitpick
CHEMBL3975506	CHEMBL2971	JAK2	CHEMBL2178801	60.5	0.41	2	hitpick
CHEMBL3975756	CHEMBL2147	PIM1	CHEMBL3634783	23.2	0.306	2	hitpick
CHEMBL3976282	CHEMBL217	DRD2	CHEMBL78406	97.4	0.711	1	hitpick
CHEMBL3976282	CHEMBL234	DRD3	CHEMBL78406	96.7	0.711	2	hitpick
CHEMBL3976307	CHEMBL2835	JAK1	CHEMBL3667523	74.5	0.427	1	hitpick
CHEMBL3976610	CHEMBL2835	JAK1	CHEMBL3667521	59.4	0.422	2	hitpick
CHEMBL3977158	CHEMBL3629	CSNK2A1	CHEMBL3699254	50.0*	0.299	2	hitpick
CHEMBL3977237	CHEMBL2971	JAK2	CHEMBL2178801	66.6*	0.365	2	hitpick
CHEMBL3977237	CHEMBL2835	JAK1	CHEMBL3667521	59.4	0.456	3	hitpick
CHEMBL3977509	CHEMBL2148	JAK3	CHEMBL1630766	88.3	0.522	2	hitpick
CHEMBL3979537	CHEMBL2835	JAK1	CHEMBL3667521	70.8*	0.431	1	hitpick
CHEMBL3979537	CHEMBL2971	JAK2	CHEMBL2178801	50.0*	0.347	3	hitpick
CHEMBL3980778	CHEMBL2148	JAK3	CHEMBL3593776	52.3	0.333	1	hitpick
CHEMBL3980778	CHEMBL2835	JAK1	CHEMBL3593776	34.7*	0.333	3	hitpick
CHEMBL3980864	CHEMBL237	OPRK1	CHEMBL3691860	97.4	0.738	1	hitpick
CHEMBL3980864	CHEMBL233	OPRM1	CHEMBL3691860	91	0.738	3	hitpick
CHEMBL3980959	CHEMBL2835	JAK1	CHEMBL3667521	45.4*	0.393	1	hitpick
CHEMBL3981057	CHEMBL1945	MTNR1A	CHEMBL3648351	95.4	0.636	1	hitpick
CHEMBL3981057	CHEMBL1946	MTNR1B	CHEMBL124577	34.7*	0.397	3	hitpick
CHEMBL3981144	CHEMBL2835	JAK1	CHEMBL3667523	74.5	0.451	1	hitpick
CHEMBL3981144	CHEMBL2971	JAK2	CHEMBL2178265	60.5	0.421	2	hitpick
CHEMBL3981187	CHEMBL2835	JAK1	CHEMBL3667523	74.5	0.462	1	hitpick
CHEMBL3981187	CHEMBL2971	JAK2	CHEMBL2178801	60.5	0.403	2	hitpick
CHEMBL3982255	CHEMBL2148	JAK3	CHEMBL1630766	74.5	0.474	1	hitpick
CHEMBL3982255	CHEMBL2971	JAK2	CHEMBL1630789	58.8*	0.443	2	hitpick
CHEMBL3982307	CHEMBL2148	JAK3	CHEMBL1630766	54.5	0.474	3	hitpick
CHEMBL3982408	CHEMBL2835	JAK1	CHEMBL3667523	74.5	0.469	1	hitpick
CHEMBL3982408	CHEMBL2971	JAK2	CHEMBL2178801	60.5	0.41	2	hitpick
CHEMBL3982418	CHEMBL2722	CYP11B2	CHEMBL446083	81.9	0.513	1	hitpick
CHEMBL3982418	CHEMBL1908	CYP11B1	CHEMBL446083	78	0.513	2	hitpick
CHEMBL3982486	CHEMBL224	HTR2A	CHEMBL3289975	84.6	0.512	2	hitpick
CHEMBL3983040	CHEMBL2835	JAK1	CHEMBL1630797	65.2*	0.453	3	hitpick
CHEMBL3983256	CHEMBL2835	JAK1	CHEMBL3667523	88.3	0.508	1	hitpick
CHEMBL3983256	CHEMBL2971	JAK2	CHEMBL2178801	60.5	0.435	3	hitpick
CHEMBL3983983	CHEMBL2835	JAK1	CHEMBL3667523	74.5	0.472	1	hitpick
CHEMBL3983983	CHEMBL2971	JAK2	CHEMBL2178801	60.5	0.413	2	hitpick
CHEMBL3984183	CHEMBL4523	PIM2	CHEMBL3634767	56.2	0.405	1	hitpick
CHEMBL3984183	CHEMBL2147	PIM1	CHEMBL3634767	46.1	0.405	2	hitpick
CHEMBL3984183	CHEMBL5407	PIM3	CHEMBL3634767	43.5	0.405	3	hitpick
CHEMBL3984282	CHEMBL5145	BRAF	CHEMBL1087906	27.2	0.3	3	hitpick
CHEMBL3984319	CHEMBL2835	JAK1	CHEMBL3667523	74.5	0.469	1	hitpick
CHEMBL3984319	CHEMBL2971	JAK2	CHEMBL2178801	60.5	0.4	2	hitpick
CHEMBL3984720	CHEMBL2835	JAK1	CHEMBL3667523	74.5	0.496	1	hitpick
CHEMBL3984720	CHEMBL2971	JAK2	CHEMBL2178801	60.5	0.424	2	hitpick
CHEMBL3984741	CHEMBL2835	JAK1	CHEMBL3667521	74.5	0.447	1	hitpick
CHEMBL3984741	CHEMBL2971	JAK2	CHEMBL2178801	50.0*	0.341	3	hitpick
CHEMBL3984764	CHEMBL2148	JAK3	CHEMBL1630766	88.3	0.507	1	hitpick
CHEMBL3984793	CHEMBL2148	JAK3	CHEMBL3652388	60.5	0.422	2	hitpick

## Sheet: PPB2-NB(ECfp4)
id	ChEMBL-ID	Rank	method
CHEMBL3883491	CHEMBL2326	4	ppb2_NB(ECfp4)
CHEMBL3883491	CHEMBL3729	10	ppb2_NB(ECfp4)
CHEMBL3884217	CHEMBL2326	1	ppb2_NB(ECfp4)
CHEMBL3884217	CHEMBL205	3	ppb2_NB(ECfp4)
CHEMBL3885230	CHEMBL205	2	ppb2_NB(ECfp4)
CHEMBL3885230	CHEMBL2326	4	ppb2_NB(ECfp4)
CHEMBL3885230	CHEMBL3729	10	ppb2_NB(ECfp4)
CHEMBL3889835	CHEMBL233	8	ppb2_NB(ECfp4)
CHEMBL3889936	CHEMBL280	1	ppb2_NB(ECfp4)
CHEMBL3889937	CHEMBL2971	10	ppb2_NB(ECfp4)
CHEMBL3890156	CHEMBL209	1	ppb2_NB(ECfp4)
CHEMBL3890156	CHEMBL1741195	2	ppb2_NB(ECfp4)
CHEMBL3890208	CHEMBL2148	2	ppb2_NB(ECfp4)
CHEMBL3890487	CHEMBL2971	9	ppb2_NB(ECfp4)
CHEMBL3890530	CHEMBL2147	2	ppb2_NB(ECfp4)
CHEMBL3890530	CHEMBL4523	3	ppb2_NB(ECfp4)
CHEMBL3890537	CHEMBL2971	6	ppb2_NB(ECfp4)
CHEMBL3890745	CHEMBL5407	1	ppb2_NB(ECfp4)
CHEMBL3890745	CHEMBL2147	2	ppb2_NB(ECfp4)
CHEMBL3890953	CHEMBL5407	8	ppb2_NB(ECfp4)
CHEMBL3890953	CHEMBL2147	9	ppb2_NB(ECfp4)
CHEMBL3890962	CHEMBL3629	1	ppb2_NB(ECfp4)
CHEMBL3891057	CHEMBL2971	4	ppb2_NB(ECfp4)
CHEMBL3891137	CHEMBL2971	8	ppb2_NB(ECfp4)
CHEMBL3891172	CHEMBL2835	1	ppb2_NB(ECfp4)
CHEMBL3891228	CHEMBL1741195	1	ppb2_NB(ECfp4)
CHEMBL3891228	CHEMBL209	2	ppb2_NB(ECfp4)
CHEMBL3891615	CHEMBL2971	3	ppb2_NB(ECfp4)
CHEMBL3891851	CHEMBL5407	1	ppb2_NB(ECfp4)
CHEMBL3891851	CHEMBL2147	4	ppb2_NB(ECfp4)
CHEMBL3892509	CHEMBL5407	1	ppb2_NB(ECfp4)
CHEMBL3892509	CHEMBL2147	5	ppb2_NB(ECfp4)
CHEMBL3892526	CHEMBL2971	7	ppb2_NB(ECfp4)
CHEMBL3892536	CHEMBL5407	2	ppb2_NB(ECfp4)
CHEMBL3892536	CHEMBL2147	6	ppb2_NB(ECfp4)
CHEMBL3892885	CHEMBL5407	1	ppb2_NB(ECfp4)
CHEMBL3892885	CHEMBL2147	4	ppb2_NB(ECfp4)
CHEMBL3893327	CHEMBL2148	1	ppb2_NB(ECfp4)
CHEMBL3893327	CHEMBL2971	4	ppb2_NB(ECfp4)
CHEMBL3893643	CHEMBL233	1	ppb2_NB(ECfp4)
CHEMBL3893643	CHEMBL237	3	ppb2_NB(ECfp4)
CHEMBL3894557	CHEMBL233	1	ppb2_NB(ECfp4)
CHEMBL3894571	CHEMBL5543	1	ppb2_NB(ECfp4)
CHEMBL3894571	CHEMBL2292	2	ppb2_NB(ECfp4)
CHEMBL3894688	CHEMBL2971	7	ppb2_NB(ECfp4)
CHEMBL3895094	CHEMBL5407	1	ppb2_NB(ECfp4)
CHEMBL3895094	CHEMBL2147	6	ppb2_NB(ECfp4)
CHEMBL3895531	CHEMBL5407	1	ppb2_NB(ECfp4)
CHEMBL3895531	CHEMBL2147	2	ppb2_NB(ECfp4)
CHEMBL3895540	CHEMBL217	1	ppb2_NB(ECfp4)
CHEMBL3895540	CHEMBL234	9	ppb2_NB(ECfp4)
CHEMBL3895925	CHEMBL2835	1	ppb2_NB(ECfp4)
CHEMBL3895925	CHEMBL2971	10	ppb2_NB(ECfp4)
CHEMBL3895998	CHEMBL262	10	ppb2_NB(ECfp4)
CHEMBL3896005	CHEMBL2971	7	ppb2_NB(ECfp4)
CHEMBL3896124	CHEMBL4523	9	ppb2_NB(ECfp4)
CHEMBL3896244	CHEMBL2147	2	ppb2_NB(ECfp4)
CHEMBL3896244	CHEMBL4523	3	ppb2_NB(ECfp4)
CHEMBL3896312	CHEMBL5407	1	ppb2_NB(ECfp4)
CHEMBL3896312	CHEMBL2147	2	ppb2_NB(ECfp4)
CHEMBL3896312	CHEMBL4523	5	ppb2_NB(ECfp4)
CHEMBL3896379	CHEMBL2971	7	ppb2_NB(ECfp4)
CHEMBL3896662	CHEMBL2971	10	ppb2_NB(ECfp4)
CHEMBL3896782	CHEMBL2147	9	ppb2_NB(ECfp4)
CHEMBL3896791	CHEMBL209	1	ppb2_NB(ECfp4)
CHEMBL3896791	CHEMBL1741195	2	ppb2_NB(ECfp4)
CHEMBL3896877	CHEMBL233	2	ppb2_NB(ECfp4)
CHEMBL3896877	CHEMBL237	3	ppb2_NB(ECfp4)
CHEMBL3896937	CHEMBL224	1	ppb2_NB(ECfp4)
CHEMBL3896937	CHEMBL217	2	ppb2_NB(ECfp4)
CHEMBL3897068	CHEMBL237	2	ppb2_NB(ECfp4)
CHEMBL3897068	CHEMBL233	4	ppb2_NB(ECfp4)
CHEMBL3897108	CHEMBL1741195	1	ppb2_NB(ECfp4)
CHEMBL3897108	CHEMBL209	2	ppb2_NB(ECfp4)
CHEMBL3897112	CHEMBL2971	8	ppb2_NB(ECfp4)
CHEMBL3897323	CHEMBL2147	2	ppb2_NB(ECfp4)
CHEMBL3897323	CHEMBL4523	3	ppb2_NB(ECfp4)
CHEMBL3897417	CHEMBL2148	1	ppb2_NB(ECfp4)
CHEMBL3897912	CHEMBL5407	2	ppb2_NB(ECfp4)
CHEMBL3897912	CHEMBL2147	5	ppb2_NB(ECfp4)
CHEMBL3897967	CHEMBL233	1	ppb2_NB(ECfp4)
CHEMBL3897967	CHEMBL237	3	ppb2_NB(ECfp4)
CHEMBL3898231	CHEMBL2971	6	ppb2_NB(ECfp4)
CHEMBL3898989	CHEMBL5407	3	ppb2_NB(ECfp4)
CHEMBL3898989	CHEMBL2147	9	ppb2_NB(ECfp4)
CHEMBL3899109	CHEMBL2971	6	ppb2_NB(ECfp4)
CHEMBL3899109	CHEMBL2835	7	ppb2_NB(ECfp4)
CHEMBL3899281	CHEMBL2835	1	ppb2_NB(ECfp4)
CHEMBL3899281	CHEMBL2971	4	ppb2_NB(ECfp4)
CHEMBL3899672	CHEMBL2148	1	ppb2_NB(ECfp4)
CHEMBL3899672	CHEMBL2835	2	ppb2_NB(ECfp4)
CHEMBL3899672	CHEMBL2971	5	ppb2_NB(ECfp4)
CHEMBL3899762	CHEMBL2971	8	ppb2_NB(ECfp4)
CHEMBL3900004	CHEMBL2971	9	ppb2_NB(ECfp4)
CHEMBL3900248	CHEMBL209	1	ppb2_NB(ECfp4)
CHEMBL3900248	CHEMBL1741195	2	ppb2_NB(ECfp4)
CHEMBL3900258	CHEMBL5407	3	ppb2_NB(ECfp4)
CHEMBL3900258	CHEMBL2147	5	ppb2_NB(ECfp4)
CHEMBL3900425	CHEMBL2147	3	ppb2_NB(ECfp4)
CHEMBL3900425	CHEMBL4523	4	ppb2_NB(ECfp4)
CHEMBL3900425	CHEMBL5407	10	ppb2_NB(ECfp4)
CHEMBL3900752	CHEMBL217	1	ppb2_NB(ECfp4)
CHEMBL3900752	CHEMBL224	2	ppb2_NB(ECfp4)
CHEMBL3900795	CHEMBL2147	2	ppb2_NB(ECfp4)
CHEMBL3900795	CHEMBL4523	3	ppb2_NB(ECfp4)
CHEMBL3901124	CHEMBL2148	1	ppb2_NB(ECfp4)
CHEMBL3901124	CHEMBL2835	2	ppb2_NB(ECfp4)
CHEMBL3901134	CHEMBL2971	3	ppb2_NB(ECfp4)
CHEMBL3901481	CHEMBL5407	1	ppb2_NB(ECfp4)
CHEMBL3901481	CHEMBL2147	2	ppb2_NB(ECfp4)
CHEMBL3901497	CHEMBL2971	8	ppb2_NB(ECfp4)
CHEMBL3902417	CHEMBL5407	1	ppb2_NB(ECfp4)
CHEMBL3902417	CHEMBL2147	5	ppb2_NB(ECfp4)
CHEMBL3902542	CHEMBL2148	1	ppb2_NB(ECfp4)
CHEMBL3902542	CHEMBL2971	5	ppb2_NB(ECfp4)
CHEMBL3902579	CHEMBL2835	4	ppb2_NB(ECfp4)
CHEMBL3902579	CHEMBL2971	6	ppb2_NB(ECfp4)
CHEMBL3903272	CHEMBL4625	1	ppb2_NB(ECfp4)
CHEMBL3903272	CHEMBL4860	2	ppb2_NB(ECfp4)
CHEMBL3903274	CHEMBL5145	9	ppb2_NB(ECfp4)
CHEMBL3903286	CHEMBL2148	1	ppb2_NB(ECfp4)
CHEMBL3903286	CHEMBL2971	5	ppb2_NB(ECfp4)
CHEMBL3903560	CHEMBL224	4	ppb2_NB(ECfp4)
CHEMBL3903560	CHEMBL234	7	ppb2_NB(ECfp4)
CHEMBL3903686	CHEMBL2147	1	ppb2_NB(ECfp4)
CHEMBL3903686	CHEMBL4523	6	ppb2_NB(ECfp4)
CHEMBL3903720	CHEMBL2971	9	ppb2_NB(ECfp4)
CHEMBL3903777	CHEMBL209	1	ppb2_NB(ECfp4)
CHEMBL3903777	CHEMBL1741195	2	ppb2_NB(ECfp4)
CHEMBL3904282	CHEMBL2147	9	ppb2_NB(ECfp4)
CHEMBL3904335	CHEMBL2971	5	ppb2_NB(ECfp4)
CHEMBL3904982	CHEMBL2971	10	ppb2_NB(ECfp4)
CHEMBL3905150	CHEMBL2148	1	ppb2_NB(ECfp4)
CHEMBL3905150	CHEMBL2835	10	ppb2_NB(ECfp4)
CHEMBL3905194	CHEMBL2147	2	ppb2_NB(ECfp4)
CHEMBL3905194	CHEMBL4523	3	ppb2_NB(ECfp4)
CHEMBL3905247	CHEMBL217	1	ppb2_NB(ECfp4)
CHEMBL3905247	CHEMBL234	4	ppb2_NB(ECfp4)
CHEMBL3905247	CHEMBL224	5	ppb2_NB(ECfp4)
CHEMBL3905788	CHEMBL2971	4	ppb2_NB(ECfp4)
CHEMBL3905788	CHEMBL2835	6	ppb2_NB(ECfp4)
CHEMBL3906087	CHEMBL2971	10	ppb2_NB(ECfp4)
CHEMBL3906357	CHEMBL4523	5	ppb2_NB(ECfp4)
CHEMBL3906421	CHEMBL5407	1	ppb2_NB(ECfp4)
CHEMBL3906421	CHEMBL2147	2	ppb2_NB(ECfp4)
CHEMBL3906798	CHEMBL5407	1	ppb2_NB(ECfp4)
CHEMBL3906798	CHEMBL2147	2	ppb2_NB(ECfp4)
CHEMBL3906798	CHEMBL4523	6	ppb2_NB(ECfp4)
CHEMBL3906885	CHEMBL2148	1	ppb2_NB(ECfp4)
CHEMBL3906885	CHEMBL2971	4	ppb2_NB(ECfp4)
CHEMBL3906961	CHEMBL2971	1	ppb2_NB(ECfp4)
CHEMBL3907010	CHEMBL3105	1	ppb2_NB(ECfp4)
CHEMBL3907320	CHEMBL2147	2	ppb2_NB(ECfp4)
CHEMBL3907320	CHEMBL5407	4	ppb2_NB(ECfp4)
CHEMBL3907536	CHEMBL1741195	1	ppb2_NB(ECfp4)
CHEMBL3907536	CHEMBL209	2	ppb2_NB(ECfp4)
CHEMBL3907732	CHEMBL2147	1	ppb2_NB(ECfp4)
CHEMBL3908233	CHEMBL2971	6	ppb2_NB(ECfp4)
CHEMBL3908328	CHEMBL2971	4	ppb2_NB(ECfp4)
CHEMBL3908409	CHEMBL2971	5	ppb2_NB(ECfp4)
CHEMBL3909091	CHEMBL2971	2	ppb2_NB(ECfp4)
CHEMBL3909092	CHEMBL2835	2	ppb2_NB(ECfp4)
CHEMBL3909092	CHEMBL2971	4	ppb2_NB(ECfp4)
CHEMBL3909280	CHEMBL5407	1	ppb2_NB(ECfp4)
CHEMBL3909280	CHEMBL4523	2	ppb2_NB(ECfp4)
CHEMBL3909280	CHEMBL2147	3	ppb2_NB(ECfp4)
CHEMBL3909510	CHEMBL2971	2	ppb2_NB(ECfp4)
CHEMBL3909785	CHEMBL4523	2	ppb2_NB(ECfp4)
CHEMBL3909785	CHEMBL2147	3	ppb2_NB(ECfp4)
CHEMBL3909947	CHEMBL2147	4	ppb2_NB(ECfp4)
CHEMBL3909947	CHEMBL5407	5	ppb2_NB(ECfp4)
CHEMBL3910228	CHEMBL4822	1	ppb2_NB(ECfp4)
CHEMBL3910228	CHEMBL2525	2	ppb2_NB(ECfp4)
CHEMBL3911166	CHEMBL2971	6	ppb2_NB(ECfp4)
CHEMBL3911942	CHEMBL2971	7	ppb2_NB(ECfp4)
CHEMBL3913446	CHEMBL2147	9	ppb2_NB(ECfp4)
CHEMBL3913540	CHEMBL2147	2	ppb2_NB(ECfp4)
CHEMBL3913540	CHEMBL4523	3	ppb2_NB(ECfp4)
CHEMBL3913691	CHEMBL224	2	ppb2_NB(ECfp4)
CHEMBL3913691	CHEMBL234	6	ppb2_NB(ECfp4)
CHEMBL3913842	CHEMBL2971	3	ppb2_NB(ECfp4)
CHEMBL3914162	CHEMBL2971	4	ppb2_NB(ECfp4)
CHEMBL3914162	CHEMBL2835	10	ppb2_NB(ECfp4)
CHEMBL3914221	CHEMBL2971	8	ppb2_NB(ECfp4)
CHEMBL3914377	CHEMBL2971	6	ppb2_NB(ECfp4)
CHEMBL3914438	CHEMBL2148	1	ppb2_NB(ECfp4)
CHEMBL3914438	CHEMBL2971	3	ppb2_NB(ECfp4)
CHEMBL3914438	CHEMBL2835	5	ppb2_NB(ECfp4)
CHEMBL3914475	CHEMBL2148	1	ppb2_NB(ECfp4)
CHEMBL3914629	CHEMBL209	1	ppb2_NB(ECfp4)
CHEMBL3914629	CHEMBL1741195	2	ppb2_NB(ECfp4)
CHEMBL3914639	CHEMBL5407	1	ppb2_NB(ECfp4)
CHEMBL3914639	CHEMBL2147	3	ppb2_NB(ECfp4)
CHEMBL3914639	CHEMBL4523	8	ppb2_NB(ECfp4)
CHEMBL3915323	CHEMBL5407	1	ppb2_NB(ECfp4)
CHEMBL3915323	CHEMBL2147	5	ppb2_NB(ECfp4)
CHEMBL3915913	CHEMBL5407	2	ppb2_NB(ECfp4)
CHEMBL3915913	CHEMBL2147	3	ppb2_NB(ECfp4)
CHEMBL3915972	CHEMBL2835	7	ppb2_NB(ECfp4)
CHEMBL3915972	CHEMBL2971	9	ppb2_NB(ECfp4)
CHEMBL3916092	CHEMBL3629	1	ppb2_NB(ECfp4)
CHEMBL3916122	CHEMBL233	1	ppb2_NB(ECfp4)
CHEMBL3916122	CHEMBL237	3	ppb2_NB(ECfp4)
CHEMBL3916604	CHEMBL209	1	ppb2_NB(ECfp4)
CHEMBL3916604	CHEMBL1741195	2	ppb2_NB(ECfp4)
CHEMBL3916637	CHEMBL2971	9	ppb2_NB(ECfp4)
CHEMBL3916902	CHEMBL5407	1	ppb2_NB(ECfp4)
CHEMBL3916902	CHEMBL2147	4	ppb2_NB(ECfp4)
CHEMBL3916925	CHEMBL2971	9	ppb2_NB(ECfp4)
CHEMBL3916961	CHEMBL1908	1	ppb2_NB(ECfp4)
CHEMBL3916961	CHEMBL2722	2	ppb2_NB(ECfp4)
CHEMBL3917077	CHEMBL5407	1	ppb2_NB(ECfp4)
CHEMBL3917077	CHEMBL2147	7	ppb2_NB(ECfp4)
CHEMBL3917906	CHEMBL2148	1	ppb2_NB(ECfp4)
CHEMBL3917906	CHEMBL2835	3	ppb2_NB(ECfp4)
CHEMBL3917906	CHEMBL2971	5	ppb2_NB(ECfp4)
CHEMBL3918076	CHEMBL2147	2	ppb2_NB(ECfp4)
CHEMBL3918076	CHEMBL4523	3	ppb2_NB(ECfp4)
CHEMBL3918273	CHEMBL2147	5	ppb2_NB(ECfp4)
CHEMBL3918538	CHEMBL2971	6	ppb2_NB(ECfp4)
CHEMBL3918755	CHEMBL217	1	ppb2_NB(ECfp4)
CHEMBL3918755	CHEMBL224	2	ppb2_NB(ECfp4)
CHEMBL3918755	CHEMBL234	8	ppb2_NB(ECfp4)
CHEMBL3919646	CHEMBL4523	2	ppb2_NB(ECfp4)
CHEMBL3919646	CHEMBL2147	3	ppb2_NB(ECfp4)
CHEMBL3919799	CHEMBL2148	1	ppb2_NB(ECfp4)
CHEMBL3919799	CHEMBL2971	5	ppb2_NB(ECfp4)
CHEMBL3919848	CHEMBL1741195	1	ppb2_NB(ECfp4)
CHEMBL3919848	CHEMBL209	2	ppb2_NB(ECfp4)
CHEMBL3920142	CHEMBL2971	5	ppb2_NB(ECfp4)
CHEMBL3920252	CHEMBL217	1	ppb2_NB(ECfp4)
CHEMBL3920252	CHEMBL224	4	ppb2_NB(ECfp4)
CHEMBL3920252	CHEMBL234	5	ppb2_NB(ECfp4)
CHEMBL3920292	CHEMBL2835	5	ppb2_NB(ECfp4)
CHEMBL3920292	CHEMBL2971	7	ppb2_NB(ECfp4)
CHEMBL3920418	CHEMBL2835	1	ppb2_NB(ECfp4)
CHEMBL3920418	CHEMBL2971	3	ppb2_NB(ECfp4)
CHEMBL3920484	CHEMBL2148	1	ppb2_NB(ECfp4)
CHEMBL3920484	CHEMBL2835	4	ppb2_NB(ECfp4)
CHEMBL3920484	CHEMBL2971	5	ppb2_NB(ECfp4)
CHEMBL3920581	CHEMBL2148	1	ppb2_NB(ECfp4)
CHEMBL3920581	CHEMBL2971	5	ppb2_NB(ECfp4)
CHEMBL3920600	CHEMBL4523	9	ppb2_NB(ECfp4)
CHEMBL3920627	CHEMBL1741195	1	ppb2_NB(ECfp4)
CHEMBL3920627	CHEMBL209	2	ppb2_NB(ECfp4)
CHEMBL3920681	CHEMBL2148	2	ppb2_NB(ECfp4)
CHEMBL3920824	CHEMBL2971	4	ppb2_NB(ECfp4)
CHEMBL3921320	CHEMBL2148	1	ppb2_NB(ECfp4)
CHEMBL3921881	CHEMBL2971	1	ppb2_NB(ECfp4)
CHEMBL3921976	CHEMBL233	3	ppb2_NB(ECfp4)
CHEMBL3922069	CHEMBL2835	1	ppb2_NB(ECfp4)
CHEMBL3922782	CHEMBL2971	8	ppb2_NB(ECfp4)
CHEMBL3922831	CHEMBL2971	5	ppb2_NB(ECfp4)
CHEMBL3923240	CHEMBL224	5	ppb2_NB(ECfp4)
CHEMBL3923240	CHEMBL214	9	ppb2_NB(ECfp4)
CHEMBL3924226	CHEMBL2971	5	ppb2_NB(ECfp4)
CHEMBL3924451	CHEMBL2971	8	ppb2_NB(ECfp4)
CHEMBL3924903	CHEMBL5407	1	ppb2_NB(ECfp4)
CHEMBL3924903	CHEMBL2147	2	ppb2_NB(ECfp4)
CHEMBL3924903	CHEMBL4523	5	ppb2_NB(ECfp4)
CHEMBL3925403	CHEMBL5407	2	ppb2_NB(ECfp4)
CHEMBL3925403	CHEMBL2147	6	ppb2_NB(ECfp4)
CHEMBL3925605	CHEMBL2148	1	ppb2_NB(ECfp4)
CHEMBL3925605	CHEMBL2971	3	ppb2_NB(ECfp4)
CHEMBL3925919	CHEMBL2971	5	ppb2_NB(ECfp4)
CHEMBL3926007	CHEMBL5407	2	ppb2_NB(ECfp4)
CHEMBL3926007	CHEMBL2147	5	ppb2_NB(ECfp4)
CHEMBL3926007	CHEMBL4523	10	ppb2_NB(ECfp4)
CHEMBL3926009	CHEMBL2971	2	ppb2_NB(ECfp4)
CHEMBL3926059	CHEMBL2148	1	ppb2_NB(ECfp4)
CHEMBL3926059	CHEMBL2971	7	ppb2_NB(ECfp4)
CHEMBL3926930	CHEMBL2148	1	ppb2_NB(ECfp4)
CHEMBL3926930	CHEMBL2971	3	ppb2_NB(ECfp4)
CHEMBL3927136	CHEMBL233	1	ppb2_NB(ECfp4)
CHEMBL3927136	CHEMBL237	3	ppb2_NB(ECfp4)
CHEMBL3927952	CHEMBL2147	1	ppb2_NB(ECfp4)
CHEMBL3927952	CHEMBL5407	5	ppb2_NB(ECfp4)
CHEMBL3928129	CHEMBL2835	3	ppb2_NB(ECfp4)
CHEMBL3928129	CHEMBL2971	4	ppb2_NB(ECfp4)
CHEMBL3928249	CHEMBL2971	8	ppb2_NB(ECfp4)
CHEMBL3928595	CHEMBL2147	1	ppb2_NB(ECfp4)
CHEMBL3928595	CHEMBL4523	6	ppb2_NB(ECfp4)
CHEMBL3929011	CHEMBL2147	2	ppb2_NB(ECfp4)
CHEMBL3929011	CHEMBL5407	3	ppb2_NB(ECfp4)
CHEMBL3929168	CHEMBL217	1	ppb2_NB(ECfp4)
CHEMBL3929168	CHEMBL224	6	ppb2_NB(ECfp4)
CHEMBL3929168	CHEMBL234	8	ppb2_NB(ECfp4)
CHEMBL3929264	CHEMBL5407	2	ppb2_NB(ECfp4)
CHEMBL3929264	CHEMBL2147	3	ppb2_NB(ECfp4)
CHEMBL3929534	CHEMBL1741195	1	ppb2_NB(ECfp4)
CHEMBL3929534	CHEMBL209	2	ppb2_NB(ECfp4)
CHEMBL3929734	CHEMBL2971	6	ppb2_NB(ECfp4)
CHEMBL3930290	CHEMBL2148	1	ppb2_NB(ECfp4)
CHEMBL3930290	CHEMBL2971	5	ppb2_NB(ECfp4)
CHEMBL3930305	CHEMBL2835	3	ppb2_NB(ECfp4)
CHEMBL3930305	CHEMBL2971	4	ppb2_NB(ECfp4)
CHEMBL3930515	CHEMBL1908	1	ppb2_NB(ECfp4)
CHEMBL3930515	CHEMBL2722	2	ppb2_NB(ECfp4)
CHEMBL3930620	CHEMBL203	3	ppb2_NB(ECfp4)
CHEMBL3930620	CHEMBL325	4	ppb2_NB(ECfp4)
CHEMBL3930712	CHEMBL2148	1	ppb2_NB(ECfp4)
CHEMBL3931274	CHEMBL5407	2	ppb2_NB(ECfp4)
CHEMBL3931278	CHEMBL2971	8	ppb2_NB(ECfp4)
CHEMBL3931279	CHEMBL5407	2	ppb2_NB(ECfp4)
CHEMBL3931279	CHEMBL2147	9	ppb2_NB(ECfp4)
CHEMBL3931819	CHEMBL2971	8	ppb2_NB(ECfp4)
CHEMBL3932186	CHEMBL224	3	ppb2_NB(ECfp4)
CHEMBL3932186	CHEMBL234	9	ppb2_NB(ECfp4)
CHEMBL3932460	CHEMBL4523	2	ppb2_NB(ECfp4)
CHEMBL3932460	CHEMBL2147	3	ppb2_NB(ECfp4)
CHEMBL3932623	CHEMBL2971	7	ppb2_NB(ECfp4)
CHEMBL3932881	CHEMBL2971	3	ppb2_NB(ECfp4)
CHEMBL3933868	CHEMBL5407	1	ppb2_NB(ECfp4)
CHEMBL3933868	CHEMBL2147	5	ppb2_NB(ECfp4)
CHEMBL3934383	CHEMBL5407	7	ppb2_NB(ECfp4)
CHEMBL3934709	CHEMBL2971	2	ppb2_NB(ECfp4)
CHEMBL3934942	CHEMBL2148	1	ppb2_NB(ECfp4)
CHEMBL3934942	CHEMBL2971	4	ppb2_NB(ECfp4)
CHEMBL3934963	CHEMBL2971	9	ppb2_NB(ECfp4)
CHEMBL3935096	CHEMBL5407	1	ppb2_NB(ECfp4)
CHEMBL3935096	CHEMBL2147	2	ppb2_NB(ECfp4)
CHEMBL3935096	CHEMBL4523	4	ppb2_NB(ECfp4)
CHEMBL3936320	CHEMBL2147	2	ppb2_NB(ECfp4)
CHEMBL3936320	CHEMBL4523	3	ppb2_NB(ECfp4)
CHEMBL3936992	CHEMBL2147	2	ppb2_NB(ECfp4)
CHEMBL3936992	CHEMBL4523	3	ppb2_NB(ECfp4)
CHEMBL3937034	CHEMBL5407	1	ppb2_NB(ECfp4)
CHEMBL3937034	CHEMBL2147	3	ppb2_NB(ECfp4)
CHEMBL3937195	CHEMBL2971	5	ppb2_NB(ECfp4)
CHEMBL3937204	CHEMBL2148	1	ppb2_NB(ECfp4)
CHEMBL3937204	CHEMBL2971	4	ppb2_NB(ECfp4)
CHEMBL3937222	CHEMBL209	1	ppb2_NB(ECfp4)
CHEMBL3937222	CHEMBL1741195	2	ppb2_NB(ECfp4)
CHEMBL3937835	CHEMBL2148	1	ppb2_NB(ECfp4)
CHEMBL3937835	CHEMBL2835	2	ppb2_NB(ECfp4)
CHEMBL3937835	CHEMBL2971	5	ppb2_NB(ECfp4)
CHEMBL3937878	CHEMBL2971	5	ppb2_NB(ECfp4)
CHEMBL3937898	CHEMBL2971	9	ppb2_NB(ECfp4)
CHEMBL3937972	CHEMBL2742	4	ppb2_NB(ECfp4)
CHEMBL3938210	CHEMBL217	1	ppb2_NB(ECfp4)
CHEMBL3938210	CHEMBL234	4	ppb2_NB(ECfp4)
CHEMBL3938210	CHEMBL224	5	ppb2_NB(ECfp4)
CHEMBL3938210	CHEMBL214	9	ppb2_NB(ECfp4)
CHEMBL3938660	CHEMBL2971	6	ppb2_NB(ECfp4)
CHEMBL3938720	CHEMBL2971	2	ppb2_NB(ECfp4)
CHEMBL3939101	CHEMBL5407	1	ppb2_NB(ECfp4)
CHEMBL3939101	CHEMBL2147	2	ppb2_NB(ECfp4)
CHEMBL3939394	CHEMBL5407	1	ppb2_NB(ECfp4)
CHEMBL3939394	CHEMBL2147	3	ppb2_NB(ECfp4)
CHEMBL3939580	CHEMBL2148	1	ppb2_NB(ECfp4)
CHEMBL3939580	CHEMBL2835	4	ppb2_NB(ECfp4)
CHEMBL3939892	CHEMBL2971	9	ppb2_NB(ECfp4)
CHEMBL3940227	CHEMBL5407	1	ppb2_NB(ECfp4)
CHEMBL3940227	CHEMBL2147	3	ppb2_NB(ECfp4)
CHEMBL3940712	CHEMBL224	5	ppb2_NB(ECfp4)
CHEMBL3940712	CHEMBL234	7	ppb2_NB(ECfp4)
CHEMBL3940744	CHEMBL5407	1	ppb2_NB(ECfp4)
CHEMBL3940744	CHEMBL2147	2	ppb2_NB(ECfp4)
CHEMBL3941202	CHEMBL2835	1	ppb2_NB(ECfp4)
CHEMBL3941202	CHEMBL2971	3	ppb2_NB(ECfp4)
CHEMBL3941211	CHEMBL2148	1	ppb2_NB(ECfp4)
CHEMBL3941211	CHEMBL2971	3	ppb2_NB(ECfp4)
CHEMBL3942104	CHEMBL5407	1	ppb2_NB(ECfp4)
CHEMBL3942104	CHEMBL2147	3	ppb2_NB(ECfp4)
CHEMBL3942446	CHEMBL5407	1	ppb2_NB(ECfp4)
CHEMBL3942446	CHEMBL2147	3	ppb2_NB(ECfp4)
CHEMBL3942619	CHEMBL262	5	ppb2_NB(ECfp4)
CHEMBL3942721	CHEMBL5145	8	ppb2_NB(ECfp4)
CHEMBL3943096	CHEMBL209	1	ppb2_NB(ECfp4)
CHEMBL3943096	CHEMBL1741195	2	ppb2_NB(ECfp4)
CHEMBL3943572	CHEMBL2835	3	ppb2_NB(ECfp4)
CHEMBL3943572	CHEMBL2971	7	ppb2_NB(ECfp4)
CHEMBL3943705	CHEMBL5407	1	ppb2_NB(ECfp4)
CHEMBL3943705	CHEMBL2147	3	ppb2_NB(ECfp4)
CHEMBL3943705	CHEMBL4523	5	ppb2_NB(ECfp4)
CHEMBL3943759	CHEMBL5407	1	ppb2_NB(ECfp4)
CHEMBL3943759	CHEMBL2147	3	ppb2_NB(ECfp4)
CHEMBL3944062	CHEMBL5407	1	ppb2_NB(ECfp4)
CHEMBL3944062	CHEMBL2147	3	ppb2_NB(ECfp4)
CHEMBL3944062	CHEMBL4523	4	ppb2_NB(ECfp4)
CHEMBL3945832	CHEMBL2973	2	ppb2_NB(ECfp4)
CHEMBL3945832	CHEMBL3231	3	ppb2_NB(ECfp4)
CHEMBL3945908	CHEMBL2835	5	ppb2_NB(ECfp4)
CHEMBL3945908	CHEMBL2971	6	ppb2_NB(ECfp4)
CHEMBL3946306	CHEMBL5407	1	ppb2_NB(ECfp4)
CHEMBL3946306	CHEMBL2147	5	ppb2_NB(ECfp4)
CHEMBL3946970	CHEMBL5407	1	ppb2_NB(ECfp4)
CHEMBL3946970	CHEMBL2147	2	ppb2_NB(ECfp4)
CHEMBL3946970	CHEMBL4523	6	ppb2_NB(ECfp4)
CHEMBL3946995	CHEMBL224	4	ppb2_NB(ECfp4)
CHEMBL3946995	CHEMBL234	7	ppb2_NB(ECfp4)
CHEMBL3947292	CHEMBL2835	1	ppb2_NB(ECfp4)
CHEMBL3947292	CHEMBL2971	4	ppb2_NB(ECfp4)
CHEMBL3947484	CHEMBL5407	1	ppb2_NB(ECfp4)
CHEMBL3947484	CHEMBL2147	2	ppb2_NB(ECfp4)
CHEMBL3947540	CHEMBL2835	1	ppb2_NB(ECfp4)
CHEMBL3947770	CHEMBL5407	2	ppb2_NB(ECfp4)
CHEMBL3947770	CHEMBL2147	8	ppb2_NB(ECfp4)
CHEMBL3948039	CHEMBL2971	3	ppb2_NB(ECfp4)
CHEMBL3948056	CHEMBL217	1	ppb2_NB(ECfp4)
CHEMBL3948056	CHEMBL224	4	ppb2_NB(ECfp4)
CHEMBL3948056	CHEMBL234	8	ppb2_NB(ECfp4)
CHEMBL3948713	CHEMBL233	1	ppb2_NB(ECfp4)
CHEMBL3948713	CHEMBL237	3	ppb2_NB(ECfp4)
CHEMBL3949136	CHEMBL2973	1	ppb2_NB(ECfp4)
CHEMBL3949274	CHEMBL5407	4	ppb2_NB(ECfp4)
CHEMBL3949274	CHEMBL2147	7	ppb2_NB(ECfp4)
CHEMBL3949310	CHEMBL2835	1	ppb2_NB(ECfp4)
CHEMBL3949310	CHEMBL2971	9	ppb2_NB(ECfp4)
CHEMBL3949394	CHEMBL2971	10	ppb2_NB(ECfp4)
CHEMBL3950269	CHEMBL5407	1	ppb2_NB(ECfp4)
CHEMBL3950269	CHEMBL2147	2	ppb2_NB(ECfp4)
CHEMBL3951001	CHEMBL209	1	ppb2_NB(ECfp4)
CHEMBL3951001	CHEMBL1741195	2	ppb2_NB(ECfp4)
CHEMBL3951088	CHEMBL5407	1	ppb2_NB(ECfp4)
CHEMBL3951088	CHEMBL2147	5	ppb2_NB(ECfp4)
CHEMBL3951178	CHEMBL2971	6	ppb2_NB(ECfp4)
CHEMBL3951198	CHEMBL1741195	1	ppb2_NB(ECfp4)
CHEMBL3951198	CHEMBL209	2	ppb2_NB(ECfp4)
CHEMBL3951623	CHEMBL2148	2	ppb2_NB(ECfp4)
CHEMBL3951623	CHEMBL2971	5	ppb2_NB(ECfp4)
CHEMBL3951874	CHEMBL2971	4	ppb2_NB(ECfp4)
CHEMBL3951947	CHEMBL2971	8	ppb2_NB(ECfp4)
CHEMBL3952022	CHEMBL2971	1	ppb2_NB(ECfp4)
CHEMBL3952029	CHEMBL2971	10	ppb2_NB(ECfp4)
CHEMBL3952360	CHEMBL5407	5	ppb2_NB(ECfp4)
CHEMBL3952360	CHEMBL2147	7	ppb2_NB(ECfp4)
CHEMBL3952555	CHEMBL2148	1	ppb2_NB(ECfp4)
CHEMBL3952555	CHEMBL2971	9	ppb2_NB(ECfp4)
CHEMBL3952845	CHEMBL5407	1	ppb2_NB(ECfp4)
CHEMBL3952845	CHEMBL2147	2	ppb2_NB(ECfp4)
CHEMBL3953164	CHEMBL5407	1	ppb2_NB(ECfp4)
CHEMBL3953164	CHEMBL2147	3	ppb2_NB(ECfp4)
CHEMBL3953164	CHEMBL4523	10	ppb2_NB(ECfp4)
CHEMBL3953482	CHEMBL5407	1	ppb2_NB(ECfp4)
CHEMBL3953482	CHEMBL2147	7	ppb2_NB(ECfp4)
CHEMBL3954558	CHEMBL2148	1	ppb2_NB(ECfp4)
CHEMBL3954558	CHEMBL2971	4	ppb2_NB(ECfp4)
CHEMBL3954782	CHEMBL233	1	ppb2_NB(ECfp4)
CHEMBL3954782	CHEMBL236	2	ppb2_NB(ECfp4)
CHEMBL3954782	CHEMBL237	3	ppb2_NB(ECfp4)
CHEMBL3955604	CHEMBL5407	4	ppb2_NB(ECfp4)
CHEMBL3955604	CHEMBL2147	8	ppb2_NB(ECfp4)
CHEMBL3955757	CHEMBL2148	1	ppb2_NB(ECfp4)
CHEMBL3955757	CHEMBL2971	6	ppb2_NB(ECfp4)
CHEMBL3956075	CHEMBL2971	9	ppb2_NB(ECfp4)
CHEMBL3956152	CHEMBL2971	5	ppb2_NB(ECfp4)
CHEMBL3956155	CHEMBL5407	1	ppb2_NB(ECfp4)
CHEMBL3956155	CHEMBL2147	2	ppb2_NB(ECfp4)
CHEMBL3956440	CHEMBL2147	1	ppb2_NB(ECfp4)
CHEMBL3956440	CHEMBL5407	2	ppb2_NB(ECfp4)
CHEMBL3956529	CHEMBL2835	2	ppb2_NB(ECfp4)
CHEMBL3956529	CHEMBL2971	6	ppb2_NB(ECfp4)
CHEMBL3956628	CHEMBL2971	9	ppb2_NB(ECfp4)
CHEMBL3956717	CHEMBL2147	2	ppb2_NB(ECfp4)
CHEMBL3956717	CHEMBL5407	3	ppb2_NB(ECfp4)
CHEMBL3956720	CHEMBL217	1	ppb2_NB(ECfp4)
CHEMBL3956720	CHEMBL224	4	ppb2_NB(ECfp4)
CHEMBL3956720	CHEMBL234	8	ppb2_NB(ECfp4)
CHEMBL3956720	CHEMBL214	9	ppb2_NB(ECfp4)
CHEMBL3956882	CHEMBL2148	3	ppb2_NB(ECfp4)
CHEMBL3957073	CHEMBL4523	9	ppb2_NB(ECfp4)
CHEMBL3957106	CHEMBL1741195	1	ppb2_NB(ECfp4)
CHEMBL3957106	CHEMBL209	2	ppb2_NB(ECfp4)
CHEMBL3957132	CHEMBL2971	8	ppb2_NB(ECfp4)
CHEMBL3957195	CHEMBL2971	2	ppb2_NB(ECfp4)
CHEMBL3957231	CHEMBL2971	2	ppb2_NB(ECfp4)
CHEMBL3957954	CHEMBL4523	3	ppb2_NB(ECfp4)
CHEMBL3957954	CHEMBL2147	5	ppb2_NB(ECfp4)
CHEMBL3957997	CHEMBL5407	1	ppb2_NB(ECfp4)
CHEMBL3957997	CHEMBL2147	5	ppb2_NB(ECfp4)
CHEMBL3958253	CHEMBL5407	1	ppb2_NB(ECfp4)
CHEMBL3958253	CHEMBL2147	3	ppb2_NB(ECfp4)
CHEMBL3958307	CHEMBL2147	1	ppb2_NB(ECfp4)
CHEMBL3958307	CHEMBL4523	2	ppb2_NB(ECfp4)
CHEMBL3958691	CHEMBL2971	10	ppb2_NB(ECfp4)
CHEMBL3958785	CHEMBL5407	2	ppb2_NB(ECfp4)
CHEMBL3958785	CHEMBL2147	6	ppb2_NB(ECfp4)
CHEMBL3958969	CHEMBL280	1	ppb2_NB(ECfp4)
CHEMBL3958969	CHEMBL333	6	ppb2_NB(ECfp4)
CHEMBL3959005	CHEMBL2835	2	ppb2_NB(ECfp4)
CHEMBL3959091	CHEMBL5407	5	ppb2_NB(ECfp4)
CHEMBL3959091	CHEMBL2147	8	ppb2_NB(ECfp4)
CHEMBL3959358	CHEMBL2835	3	ppb2_NB(ECfp4)
CHEMBL3959358	CHEMBL2971	4	ppb2_NB(ECfp4)
CHEMBL3959398	CHEMBL233	2	ppb2_NB(ECfp4)
CHEMBL3959433	CHEMBL2835	1	ppb2_NB(ECfp4)
CHEMBL3959433	CHEMBL2971	4	ppb2_NB(ECfp4)
CHEMBL3959581	CHEMBL5145	10	ppb2_NB(ECfp4)
CHEMBL3959770	CHEMBL2835	6	ppb2_NB(ECfp4)
CHEMBL3959770	CHEMBL2971	8	ppb2_NB(ECfp4)
CHEMBL3959909	CHEMBL2835	3	ppb2_NB(ECfp4)
CHEMBL3959909	CHEMBL2971	4	ppb2_NB(ECfp4)
CHEMBL3959924	CHEMBL2971	7	ppb2_NB(ECfp4)
CHEMBL3960213	CHEMBL2148	1	ppb2_NB(ECfp4)
CHEMBL3960213	CHEMBL2971	4	ppb2_NB(ECfp4)
CHEMBL3960416	CHEMBL2148	1	ppb2_NB(ECfp4)
CHEMBL3960416	CHEMBL2971	4	ppb2_NB(ECfp4)
CHEMBL3960554	CHEMBL5407	2	ppb2_NB(ECfp4)
CHEMBL3960554	CHEMBL4523	3	ppb2_NB(ECfp4)
CHEMBL3960554	CHEMBL2147	5	ppb2_NB(ECfp4)
CHEMBL3960785	CHEMBL217	1	ppb2_NB(ECfp4)
CHEMBL3960785	CHEMBL224	5	ppb2_NB(ECfp4)
CHEMBL3960785	CHEMBL234	7	ppb2_NB(ECfp4)
CHEMBL3961360	CHEMBL5407	1	ppb2_NB(ECfp4)
CHEMBL3961360	CHEMBL2147	3	ppb2_NB(ECfp4)
CHEMBL3961525	CHEMBL5407	1	ppb2_NB(ECfp4)
CHEMBL3961525	CHEMBL2147	3	ppb2_NB(ECfp4)
CHEMBL3961670	CHEMBL2971	4	ppb2_NB(ECfp4)
CHEMBL3961670	CHEMBL2835	5	ppb2_NB(ECfp4)
CHEMBL3961850	CHEMBL2148	1	ppb2_NB(ECfp4)
CHEMBL3961850	CHEMBL2971	5	ppb2_NB(ECfp4)
CHEMBL3962064	CHEMBL2147	2	ppb2_NB(ECfp4)
CHEMBL3962342	CHEMBL2971	7	ppb2_NB(ECfp4)
CHEMBL3962386	CHEMBL2835	1	ppb2_NB(ECfp4)
CHEMBL3962386	CHEMBL2971	4	ppb2_NB(ECfp4)
CHEMBL3962448	CHEMBL2148	1	ppb2_NB(ECfp4)
CHEMBL3962448	CHEMBL2971	5	ppb2_NB(ECfp4)
CHEMBL3962506	CHEMBL2835	1	ppb2_NB(ECfp4)
CHEMBL3962506	CHEMBL2971	10	ppb2_NB(ECfp4)
CHEMBL3962525	CHEMBL224	6	ppb2_NB(ECfp4)
CHEMBL3962525	CHEMBL234	7	ppb2_NB(ECfp4)
CHEMBL3963191	CHEMBL2835	5	ppb2_NB(ECfp4)
CHEMBL3963271	CHEMBL2971	6	ppb2_NB(ECfp4)
CHEMBL3963605	CHEMBL262	8	ppb2_NB(ECfp4)
CHEMBL3963946	CHEMBL5407	1	ppb2_NB(ECfp4)
CHEMBL3963946	CHEMBL2147	2	ppb2_NB(ECfp4)
CHEMBL3964598	CHEMBL233	2	ppb2_NB(ECfp4)
CHEMBL3964598	CHEMBL237	3	ppb2_NB(ECfp4)
CHEMBL3964801	CHEMBL2971	7	ppb2_NB(ECfp4)
CHEMBL3964990	CHEMBL2971	5	ppb2_NB(ECfp4)
CHEMBL3965069	CHEMBL1741195	1	ppb2_NB(ECfp4)
CHEMBL3965069	CHEMBL209	2	ppb2_NB(ECfp4)
CHEMBL3965297	CHEMBL2147	2	ppb2_NB(ECfp4)
CHEMBL3965297	CHEMBL4523	3	ppb2_NB(ECfp4)
CHEMBL3965713	CHEMBL2835	2	ppb2_NB(ECfp4)
CHEMBL3965713	CHEMBL2971	5	ppb2_NB(ECfp4)
CHEMBL3965741	CHEMBL5407	1	ppb2_NB(ECfp4)
CHEMBL3965741	CHEMBL2147	2	ppb2_NB(ECfp4)
CHEMBL3965757	CHEMBL2147	2	ppb2_NB(ECfp4)
CHEMBL3965757	CHEMBL4523	3	ppb2_NB(ECfp4)
CHEMBL3965809	CHEMBL2971	2	ppb2_NB(ECfp4)
CHEMBL3965946	CHEMBL2147	2	ppb2_NB(ECfp4)
CHEMBL3965946	CHEMBL4523	3	ppb2_NB(ECfp4)
CHEMBL3966363	CHEMBL2147	1	ppb2_NB(ECfp4)
CHEMBL3966363	CHEMBL4523	6	ppb2_NB(ECfp4)
CHEMBL3966696	CHEMBL5407	1	ppb2_NB(ECfp4)
CHEMBL3966696	CHEMBL2147	2	ppb2_NB(ECfp4)
CHEMBL3966732	CHEMBL2147	2	ppb2_NB(ECfp4)
CHEMBL3966732	CHEMBL4523	3	ppb2_NB(ECfp4)
CHEMBL3966806	CHEMBL4282	4	ppb2_NB(ECfp4)
CHEMBL3966830	CHEMBL233	1	ppb2_NB(ECfp4)
CHEMBL3966830	CHEMBL237	3	ppb2_NB(ECfp4)
CHEMBL3966842	CHEMBL217	1	ppb2_NB(ECfp4)
CHEMBL3966842	CHEMBL224	3	ppb2_NB(ECfp4)
CHEMBL3966842	CHEMBL234	10	ppb2_NB(ECfp4)
CHEMBL3967830	CHEMBL2835	7	ppb2_NB(ECfp4)
CHEMBL3967830	CHEMBL2971	8	ppb2_NB(ECfp4)
CHEMBL3967893	CHEMBL5145	5	ppb2_NB(ECfp4)
CHEMBL3968206	CHEMBL5407	1	ppb2_NB(ECfp4)
CHEMBL3968206	CHEMBL2147	2	ppb2_NB(ECfp4)
CHEMBL3968315	CHEMBL2971	5	ppb2_NB(ECfp4)
CHEMBL3968781	CHEMBL2971	10	ppb2_NB(ECfp4)
CHEMBL3968925	CHEMBL3267	2	ppb2_NB(ECfp4)
CHEMBL3968925	CHEMBL4005	3	ppb2_NB(ECfp4)
CHEMBL3969155	CHEMBL233	1	ppb2_NB(ECfp4)
CHEMBL3969155	CHEMBL237	3	ppb2_NB(ECfp4)
CHEMBL3969253	CHEMBL2971	6	ppb2_NB(ECfp4)
CHEMBL3970360	CHEMBL2835	5	ppb2_NB(ECfp4)
CHEMBL3970360	CHEMBL2971	9	ppb2_NB(ECfp4)
CHEMBL3970779	CHEMBL2971	8	ppb2_NB(ECfp4)
CHEMBL3970953	CHEMBL5407	1	ppb2_NB(ECfp4)
CHEMBL3970953	CHEMBL2147	3	ppb2_NB(ECfp4)
CHEMBL3970953	CHEMBL4523	6	ppb2_NB(ECfp4)
CHEMBL3970981	CHEMBL5407	2	ppb2_NB(ECfp4)
CHEMBL3970981	CHEMBL2147	3	ppb2_NB(ECfp4)
CHEMBL3971907	CHEMBL217	1	ppb2_NB(ECfp4)
CHEMBL3971907	CHEMBL224	2	ppb2_NB(ECfp4)
CHEMBL3971907	CHEMBL234	8	ppb2_NB(ECfp4)
CHEMBL3972050	CHEMBL5407	1	ppb2_NB(ECfp4)
CHEMBL3972050	CHEMBL2147	4	ppb2_NB(ECfp4)
CHEMBL3972453	CHEMBL5407	1	ppb2_NB(ECfp4)
CHEMBL3972453	CHEMBL2147	6	ppb2_NB(ECfp4)
CHEMBL3972830	CHEMBL2971	6	ppb2_NB(ECfp4)
CHEMBL3973487	CHEMBL234	5	ppb2_NB(ECfp4)
CHEMBL3973487	CHEMBL214	9	ppb2_NB(ECfp4)
CHEMBL3973544	CHEMBL5407	1	ppb2_NB(ECfp4)
CHEMBL3973544	CHEMBL2147	3	ppb2_NB(ECfp4)
CHEMBL3973547	CHEMBL2971	7	ppb2_NB(ECfp4)
CHEMBL3973848	CHEMBL2148	1	ppb2_NB(ECfp4)
CHEMBL3973848	CHEMBL2971	7	ppb2_NB(ECfp4)
CHEMBL3974857	CHEMBL233	1	ppb2_NB(ECfp4)
CHEMBL3974857	CHEMBL237	3	ppb2_NB(ECfp4)
CHEMBL3975046	CHEMBL2835	1	ppb2_NB(ECfp4)
CHEMBL3975198	CHEMBL5407	1	ppb2_NB(ECfp4)
CHEMBL3975198	CHEMBL2147	2	ppb2_NB(ECfp4)
CHEMBL3975764	CHEMBL5407	1	ppb2_NB(ECfp4)
CHEMBL3975764	CHEMBL2147	3	ppb2_NB(ECfp4)
CHEMBL3975787	CHEMBL5407	2	ppb2_NB(ECfp4)
CHEMBL3975787	CHEMBL2147	5	ppb2_NB(ECfp4)
CHEMBL3976267	CHEMBL5407	1	ppb2_NB(ECfp4)
CHEMBL3976267	CHEMBL2147	2	ppb2_NB(ECfp4)
CHEMBL3976282	CHEMBL217	1	ppb2_NB(ECfp4)
CHEMBL3976282	CHEMBL234	4	ppb2_NB(ECfp4)
CHEMBL3976282	CHEMBL224	5	ppb2_NB(ECfp4)
CHEMBL3977158	CHEMBL3629	2	ppb2_NB(ECfp4)
CHEMBL3977237	CHEMBL2971	2	ppb2_NB(ECfp4)
CHEMBL3977452	CHEMBL2148	1	ppb2_NB(ECfp4)
CHEMBL3977452	CHEMBL2971	5	ppb2_NB(ECfp4)
CHEMBL3977509	CHEMBL2148	1	ppb2_NB(ECfp4)
CHEMBL3977509	CHEMBL2971	4	ppb2_NB(ECfp4)
CHEMBL3979182	CHEMBL2147	4	ppb2_NB(ECfp4)
CHEMBL3979537	CHEMBL2971	10	ppb2_NB(ECfp4)
CHEMBL3980040	CHEMBL5407	1	ppb2_NB(ECfp4)
CHEMBL3980040	CHEMBL2147	4	ppb2_NB(ECfp4)
CHEMBL3980778	CHEMBL2148	1	ppb2_NB(ECfp4)
CHEMBL3980778	CHEMBL2835	5	ppb2_NB(ECfp4)
CHEMBL3980864	CHEMBL233	1	ppb2_NB(ECfp4)
CHEMBL3980864	CHEMBL237	3	ppb2_NB(ECfp4)
CHEMBL3981144	CHEMBL2971	5	ppb2_NB(ECfp4)
CHEMBL3981187	CHEMBL2971	7	ppb2_NB(ECfp4)
CHEMBL3982255	CHEMBL2148	1	ppb2_NB(ECfp4)
CHEMBL3982255	CHEMBL2971	5	ppb2_NB(ECfp4)
CHEMBL3982307	CHEMBL2148	1	ppb2_NB(ECfp4)
CHEMBL3982307	CHEMBL2971	5	ppb2_NB(ECfp4)
CHEMBL3982408	CHEMBL2971	2	ppb2_NB(ECfp4)
CHEMBL3982418	CHEMBL2722	1	ppb2_NB(ECfp4)
CHEMBL3982418	CHEMBL1908	2	ppb2_NB(ECfp4)
CHEMBL3982486	CHEMBL217	1	ppb2_NB(ECfp4)
CHEMBL3982486	CHEMBL224	5	ppb2_NB(ECfp4)
CHEMBL3982486	CHEMBL234	7	ppb2_NB(ECfp4)
CHEMBL3982486	CHEMBL214	9	ppb2_NB(ECfp4)
CHEMBL3982497	CHEMBL3920	10	ppb2_NB(ECfp4)
CHEMBL3982539	CHEMBL5407	1	ppb2_NB(ECfp4)
CHEMBL3982539	CHEMBL2147	2	ppb2_NB(ECfp4)
CHEMBL3983040	CHEMBL2835	3	ppb2_NB(ECfp4)
CHEMBL3983040	CHEMBL2971	5	ppb2_NB(ECfp4)
CHEMBL3983256	CHEMBL2971	5	ppb2_NB(ECfp4)
CHEMBL3983351	CHEMBL5407	5	ppb2_NB(ECfp4)
CHEMBL3983983	CHEMBL2971	6	ppb2_NB(ECfp4)
CHEMBL3984183	CHEMBL5407	5	ppb2_NB(ECfp4)
CHEMBL3984183	CHEMBL2147	6	ppb2_NB(ECfp4)
CHEMBL3984183	CHEMBL4523	7	ppb2_NB(ECfp4)
CHEMBL3984764	CHEMBL2148	1	ppb2_NB(ECfp4)
CHEMBL3984764	CHEMBL2971	4	ppb2_NB(ECfp4)
CHEMBL3984793	CHEMBL2148	1	ppb2_NB(ECfp4)
CHEMBL3984961	CHEMBL2147	7	ppb2_NB(ECfp4)

## Sheet: NN(ECfp4)+ NB(ECfp4)
id	ChEMBL-ID	Rank	method
CHEMBL3218576	CHEMBL4005	4	ppb2_NN(ECfp4) + NB(ECfp4)
CHEMBL3883491	CHEMBL2326	6	ppb2_NN(ECfp4) + NB(ECfp4)
CHEMBL3884217	CHEMBL205	2	ppb2_NN(ECfp4) + NB(ECfp4)
CHEMBL3884217	CHEMBL2326	5	ppb2_NN(ECfp4) + NB(ECfp4)
CHEMBL3885230	CHEMBL205	1	ppb2_NN(ECfp4) + NB(ECfp4)
CHEMBL3885230	CHEMBL2326	6	ppb2_NN(ECfp4) + NB(ECfp4)
CHEMBL3889835	CHEMBL233	1	ppb2_NN(ECfp4) + NB(ECfp4)
CHEMBL3889835	CHEMBL2014	3	ppb2_NN(ECfp4) + NB(ECfp4)
CHEMBL3889936	CHEMBL280	1	ppb2_NN(ECfp4) + NB(ECfp4)
CHEMBL3889937	CHEMBL2835	2	ppb2_NN(ECfp4) + NB(ECfp4)
CHEMBL3889937	CHEMBL2971	4	ppb2_NN(ECfp4) + NB(ECfp4)
CHEMBL3890156	CHEMBL209	1	ppb2_NN(ECfp4) + NB(ECfp4)
CHEMBL3890156	CHEMBL1741195	2	ppb2_NN(ECfp4) + NB(ECfp4)
CHEMBL3890208	CHEMBL2971	1	ppb2_NN(ECfp4) + NB(ECfp4)
CHEMBL3890487	CHEMBL2835	2	ppb2_NN(ECfp4) + NB(ECfp4)
CHEMBL3890487	CHEMBL2971	3	ppb2_NN(ECfp4) + NB(ECfp4)
CHEMBL3890530	CHEMBL4523	2	ppb2_NN(ECfp4) + NB(ECfp4)
CHEMBL3890530	CHEMBL2147	3	ppb2_NN(ECfp4) + NB(ECfp4)
CHEMBL3890537	CHEMBL2835	2	ppb2_NN(ECfp4) + NB(ECfp4)
CHEMBL3890537	CHEMBL2971	4	ppb2_NN(ECfp4) + NB(ECfp4)
CHEMBL3890745	CHEMBL2147	3	ppb2_NN(ECfp4) + NB(ECfp4)
CHEMBL3890745	CHEMBL5407	7	ppb2_NN(ECfp4) + NB(ECfp4)
CHEMBL3890953	CHEMBL2147	1	ppb2_NN(ECfp4) + NB(ECfp4)
CHEMBL3890953	CHEMBL5407	4	ppb2_NN(ECfp4) + NB(ECfp4)
CHEMBL3890962	CHEMBL3629	1	ppb2_NN(ECfp4) + NB(ECfp4)
CHEMBL3891057	CHEMBL2835	2	ppb2_NN(ECfp4) + NB(ECfp4)
CHEMBL3891057	CHEMBL2971	3	ppb2_NN(ECfp4) + NB(ECfp4)
CHEMBL3891137	CHEMBL2835	2	ppb2_NN(ECfp4) + NB(ECfp4)
CHEMBL3891137	CHEMBL2971	3	ppb2_NN(ECfp4) + NB(ECfp4)
CHEMBL3891172	CHEMBL2835	1	ppb2_NN(ECfp4) + NB(ECfp4)
CHEMBL3891172	CHEMBL2971	3	ppb2_NN(ECfp4) + NB(ECfp4)
CHEMBL3891228	CHEMBL209	1	ppb2_NN(ECfp4) + NB(ECfp4)
CHEMBL3891228	CHEMBL1741195	2	ppb2_NN(ECfp4) + NB(ECfp4)
CHEMBL3891615	CHEMBL2835	2	ppb2_NN(ECfp4) + NB(ECfp4)
CHEMBL3891615	CHEMBL2971	3	ppb2_NN(ECfp4) + NB(ECfp4)
CHEMBL3891851	CHEMBL5407	2	ppb2_NN(ECfp4) + NB(ECfp4)
CHEMBL3891851	CHEMBL2147	3	ppb2_NN(ECfp4) + NB(ECfp4)
CHEMBL3891851	CHEMBL4523	4	ppb2_NN(ECfp4) + NB(ECfp4)
CHEMBL3892509	CHEMBL2147	1	ppb2_NN(ECfp4) + NB(ECfp4)
CHEMBL3892509	CHEMBL5407	3	ppb2_NN(ECfp4) + NB(ECfp4)
CHEMBL3892526	CHEMBL2835	3	ppb2_NN(ECfp4) + NB(ECfp4)
CHEMBL3892526	CHEMBL2971	4	ppb2_NN(ECfp4) + NB(ECfp4)
CHEMBL3892536	CHEMBL2147	1	ppb2_NN(ECfp4) + NB(ECfp4)
CHEMBL3892536	CHEMBL5407	4	ppb2_NN(ECfp4) + NB(ECfp4)
CHEMBL3892885	CHEMBL5407	2	ppb2_NN(ECfp4) + NB(ECfp4)
CHEMBL3892885	CHEMBL4523	4	ppb2_NN(ECfp4) + NB(ECfp4)
CHEMBL3892885	CHEMBL2147	5	ppb2_NN(ECfp4) + NB(ECfp4)
CHEMBL3893327	CHEMBL2148	1	ppb2_NN(ECfp4) + NB(ECfp4)
CHEMBL3893327	CHEMBL2971	5	ppb2_NN(ECfp4) + NB(ECfp4)
CHEMBL3893449	CHEMBL2835	2	ppb2_NN(ECfp4) + NB(ECfp4)
CHEMBL3893449	CHEMBL2971	4	ppb2_NN(ECfp4) + NB(ECfp4)
CHEMBL3893643	CHEMBL237	2	ppb2_NN(ECfp4) + NB(ECfp4)
CHEMBL3893643	CHEMBL233	3	ppb2_NN(ECfp4) + NB(ECfp4)
CHEMBL3893713	CHEMBL2835	4	ppb2_NN(ECfp4) + NB(ECfp4)
CHEMBL3893713	CHEMBL2971	9	ppb2_NN(ECfp4) + NB(ECfp4)
CHEMBL3894557	CHEMBL233	2	ppb2_NN(ECfp4) + NB(ECfp4)
CHEMBL3894571	CHEMBL2292	1	ppb2_NN(ECfp4) + NB(ECfp4)
CHEMBL3894571	CHEMBL5543	2	ppb2_NN(ECfp4) + NB(ECfp4)
CHEMBL3894688	CHEMBL2835	2	ppb2_NN(ECfp4) + NB(ECfp4)
CHEMBL3894688	CHEMBL2971	3	ppb2_NN(ECfp4) + NB(ECfp4)
CHEMBL3895094	CHEMBL2147	4	ppb2_NN(ECfp4) + NB(ECfp4)
CHEMBL3895094	CHEMBL5407	10	ppb2_NN(ECfp4) + NB(ECfp4)
CHEMBL3895531	CHEMBL2147	2	ppb2_NN(ECfp4) + NB(ECfp4)
CHEMBL3895531	CHEMBL5407	5	ppb2_NN(ECfp4) + NB(ECfp4)
CHEMBL3895540	CHEMBL217	5	ppb2_NN(ECfp4) + NB(ECfp4)
CHEMBL3895925	CHEMBL2835	1	ppb2_NN(ECfp4) + NB(ECfp4)
CHEMBL3895925	CHEMBL2971	2	ppb2_NN(ECfp4) + NB(ECfp4)
CHEMBL3895998	CHEMBL262	8	ppb2_NN(ECfp4) + NB(ECfp4)
CHEMBL3896005	CHEMBL2971	4	ppb2_NN(ECfp4) + NB(ECfp4)
CHEMBL3896005	CHEMBL2835	6	ppb2_NN(ECfp4) + NB(ECfp4)
CHEMBL3896141	CHEMBL2835	2	ppb2_NN(ECfp4) + NB(ECfp4)
CHEMBL3896141	CHEMBL2971	4	ppb2_NN(ECfp4) + NB(ECfp4)
CHEMBL3896244	CHEMBL4523	2	ppb2_NN(ECfp4) + NB(ECfp4)
CHEMBL3896244	CHEMBL2147	3	ppb2_NN(ECfp4) + NB(ECfp4)
CHEMBL3896312	CHEMBL5407	1	ppb2_NN(ECfp4) + NB(ECfp4)
CHEMBL3896312	CHEMBL2147	2	ppb2_NN(ECfp4) + NB(ECfp4)
CHEMBL3896312	CHEMBL4523	3	ppb2_NN(ECfp4) + NB(ECfp4)
CHEMBL3896379	CHEMBL2835	1	ppb2_NN(ECfp4) + NB(ECfp4)
CHEMBL3896379	CHEMBL2971	3	ppb2_NN(ECfp4) + NB(ECfp4)
CHEMBL3896662	CHEMBL2835	2	ppb2_NN(ECfp4) + NB(ECfp4)
CHEMBL3896662	CHEMBL2971	4	ppb2_NN(ECfp4) + NB(ECfp4)
CHEMBL3896759	CHEMBL2835	2	ppb2_NN(ECfp4) + NB(ECfp4)
CHEMBL3896759	CHEMBL2971	3	ppb2_NN(ECfp4) + NB(ECfp4)
CHEMBL3896782	CHEMBL2147	5	ppb2_NN(ECfp4) + NB(ECfp4)
CHEMBL3896791	CHEMBL209	1	ppb2_NN(ECfp4) + NB(ECfp4)
CHEMBL3896791	CHEMBL1741195	2	ppb2_NN(ECfp4) + NB(ECfp4)
CHEMBL3896877	CHEMBL233	1	ppb2_NN(ECfp4) + NB(ECfp4)
CHEMBL3896877	CHEMBL237	3	ppb2_NN(ECfp4) + NB(ECfp4)
CHEMBL3896937	CHEMBL224	1	ppb2_NN(ECfp4) + NB(ECfp4)
CHEMBL3896937	CHEMBL217	3	ppb2_NN(ECfp4) + NB(ECfp4)
CHEMBL3896937	CHEMBL234	10	ppb2_NN(ECfp4) + NB(ECfp4)
CHEMBL3897068	CHEMBL237	3	ppb2_NN(ECfp4) + NB(ECfp4)
CHEMBL3897068	CHEMBL233	4	ppb2_NN(ECfp4) + NB(ECfp4)
CHEMBL3897108	CHEMBL209	1	ppb2_NN(ECfp4) + NB(ECfp4)
CHEMBL3897108	CHEMBL1741195	2	ppb2_NN(ECfp4) + NB(ECfp4)
CHEMBL3897112	CHEMBL2835	2	ppb2_NN(ECfp4) + NB(ECfp4)
CHEMBL3897323	CHEMBL4523	2	ppb2_NN(ECfp4) + NB(ECfp4)
CHEMBL3897323	CHEMBL2147	3	ppb2_NN(ECfp4) + NB(ECfp4)
CHEMBL3897417	CHEMBL2148	1	ppb2_NN(ECfp4) + NB(ECfp4)
CHEMBL3897417	CHEMBL2971	2	ppb2_NN(ECfp4) + NB(ECfp4)
CHEMBL3897417	CHEMBL2835	7	ppb2_NN(ECfp4) + NB(ECfp4)
CHEMBL3897606	CHEMBL2147	8	ppb2_NN(ECfp4) + NB(ECfp4)
CHEMBL3897912	CHEMBL2147	2	ppb2_NN(ECfp4) + NB(ECfp4)
CHEMBL3897912	CHEMBL5407	4	ppb2_NN(ECfp4) + NB(ECfp4)
CHEMBL3897912	CHEMBL4523	5	ppb2_NN(ECfp4) + NB(ECfp4)
CHEMBL3897967	CHEMBL237	1	ppb2_NN(ECfp4) + NB(ECfp4)
CHEMBL3897967	CHEMBL233	3	ppb2_NN(ECfp4) + NB(ECfp4)
CHEMBL3897993	CHEMBL2835	2	ppb2_NN(ECfp4) + NB(ECfp4)
CHEMBL3897993	CHEMBL2971	6	ppb2_NN(ECfp4) + NB(ECfp4)
CHEMBL3898231	CHEMBL2835	2	ppb2_NN(ECfp4) + NB(ECfp4)
CHEMBL3898231	CHEMBL2971	3	ppb2_NN(ECfp4) + NB(ECfp4)
CHEMBL3898989	CHEMBL5407	5	ppb2_NN(ECfp4) + NB(ECfp4)
CHEMBL3898989	CHEMBL2147	8	ppb2_NN(ECfp4) + NB(ECfp4)
CHEMBL3898989	CHEMBL4523	9	ppb2_NN(ECfp4) + NB(ECfp4)
CHEMBL3899109	CHEMBL2835	2	ppb2_NN(ECfp4) + NB(ECfp4)
CHEMBL3899109	CHEMBL2971	4	ppb2_NN(ECfp4) + NB(ECfp4)
CHEMBL3899281	CHEMBL2835	1	ppb2_NN(ECfp4) + NB(ECfp4)
CHEMBL3899281	CHEMBL2971	3	ppb2_NN(ECfp4) + NB(ECfp4)
CHEMBL3899672	CHEMBL2148	1	ppb2_NN(ECfp4) + NB(ECfp4)
CHEMBL3899672	CHEMBL2835	5	ppb2_NN(ECfp4) + NB(ECfp4)
CHEMBL3899672	CHEMBL2971	6	ppb2_NN(ECfp4) + NB(ECfp4)
CHEMBL3899762	CHEMBL2835	2	ppb2_NN(ECfp4) + NB(ECfp4)
CHEMBL3899762	CHEMBL2971	4	ppb2_NN(ECfp4) + NB(ECfp4)
CHEMBL3900004	CHEMBL2835	2	ppb2_NN(ECfp4) + NB(ECfp4)
CHEMBL3900004	CHEMBL2971	5	ppb2_NN(ECfp4) + NB(ECfp4)
CHEMBL3900248	CHEMBL209	1	ppb2_NN(ECfp4) + NB(ECfp4)
CHEMBL3900248	CHEMBL1741195	2	ppb2_NN(ECfp4) + NB(ECfp4)
CHEMBL3900425	CHEMBL2147	4	ppb2_NN(ECfp4) + NB(ECfp4)
CHEMBL3900425	CHEMBL4523	6	ppb2_NN(ECfp4) + NB(ECfp4)
CHEMBL3900752	CHEMBL224	2	ppb2_NN(ECfp4) + NB(ECfp4)
CHEMBL3900752	CHEMBL217	3	ppb2_NN(ECfp4) + NB(ECfp4)
CHEMBL3900795	CHEMBL4523	2	ppb2_NN(ECfp4) + NB(ECfp4)
CHEMBL3900795	CHEMBL2147	3	ppb2_NN(ECfp4) + NB(ECfp4)
CHEMBL3901124	CHEMBL2148	1	ppb2_NN(ECfp4) + NB(ECfp4)
CHEMBL3901124	CHEMBL2835	2	ppb2_NN(ECfp4) + NB(ECfp4)
CHEMBL3901124	CHEMBL2971	5	ppb2_NN(ECfp4) + NB(ECfp4)
CHEMBL3901134	CHEMBL2835	3	ppb2_NN(ECfp4) + NB(ECfp4)
CHEMBL3901481	CHEMBL2147	4	ppb2_NN(ECfp4) + NB(ECfp4)
CHEMBL3901481	CHEMBL5407	8	ppb2_NN(ECfp4) + NB(ECfp4)
CHEMBL3901497	CHEMBL2971	1	ppb2_NN(ECfp4) + NB(ECfp4)
CHEMBL3901497	CHEMBL2835	8	ppb2_NN(ECfp4) + NB(ECfp4)
CHEMBL3902417	CHEMBL2147	1	ppb2_NN(ECfp4) + NB(ECfp4)
CHEMBL3902417	CHEMBL5407	2	ppb2_NN(ECfp4) + NB(ECfp4)
CHEMBL3902542	CHEMBL2148	1	ppb2_NN(ECfp4) + NB(ECfp4)
CHEMBL3902542	CHEMBL2971	5	ppb2_NN(ECfp4) + NB(ECfp4)
CHEMBL3902579	CHEMBL2971	5	ppb2_NN(ECfp4) + NB(ECfp4)
CHEMBL3902579	CHEMBL2835	6	ppb2_NN(ECfp4) + NB(ECfp4)
CHEMBL3903218	CHEMBL2835	2	ppb2_NN(ECfp4) + NB(ECfp4)
CHEMBL3903218	CHEMBL2971	5	ppb2_NN(ECfp4) + NB(ECfp4)
CHEMBL3903272	CHEMBL4625	1	ppb2_NN(ECfp4) + NB(ECfp4)
CHEMBL3903272	CHEMBL4860	2	ppb2_NN(ECfp4) + NB(ECfp4)
CHEMBL3903286	CHEMBL2971	8	ppb2_NN(ECfp4) + NB(ECfp4)
CHEMBL3903560	CHEMBL224	2	ppb2_NN(ECfp4) + NB(ECfp4)
CHEMBL3903560	CHEMBL234	7	ppb2_NN(ECfp4) + NB(ECfp4)
CHEMBL3903686	CHEMBL2147	1	ppb2_NN(ECfp4) + NB(ECfp4)
CHEMBL3903686	CHEMBL4523	2	ppb2_NN(ECfp4) + NB(ECfp4)
CHEMBL3903720	CHEMBL2835	2	ppb2_NN(ECfp4) + NB(ECfp4)
CHEMBL3903720	CHEMBL2971	3	ppb2_NN(ECfp4) + NB(ECfp4)
CHEMBL3903777	CHEMBL1741195	1	ppb2_NN(ECfp4) + NB(ECfp4)
CHEMBL3903777	CHEMBL209	2	ppb2_NN(ECfp4) + NB(ECfp4)
CHEMBL3903837	CHEMBL2147	4	ppb2_NN(ECfp4) + NB(ECfp4)
CHEMBL3903837	CHEMBL4523	6	ppb2_NN(ECfp4) + NB(ECfp4)
CHEMBL3904282	CHEMBL2147	5	ppb2_NN(ECfp4) + NB(ECfp4)
CHEMBL3904282	CHEMBL4523	6	ppb2_NN(ECfp4) + NB(ECfp4)
CHEMBL3904335	CHEMBL2835	6	ppb2_NN(ECfp4) + NB(ECfp4)
CHEMBL3904335	CHEMBL2971	7	ppb2_NN(ECfp4) + NB(ECfp4)
CHEMBL3904982	CHEMBL2835	2	ppb2_NN(ECfp4) + NB(ECfp4)
CHEMBL3904982	CHEMBL2971	4	ppb2_NN(ECfp4) + NB(ECfp4)
CHEMBL3905144	CHEMBL2147	4	ppb2_NN(ECfp4) + NB(ECfp4)
CHEMBL3905144	CHEMBL4523	7	ppb2_NN(ECfp4) + NB(ECfp4)
CHEMBL3905150	CHEMBL2835	1	ppb2_NN(ECfp4) + NB(ECfp4)
CHEMBL3905150	CHEMBL2148	2	ppb2_NN(ECfp4) + NB(ECfp4)
CHEMBL3905194	CHEMBL4523	2	ppb2_NN(ECfp4) + NB(ECfp4)
CHEMBL3905194	CHEMBL2147	3	ppb2_NN(ECfp4) + NB(ECfp4)
CHEMBL3905247	CHEMBL217	2	ppb2_NN(ECfp4) + NB(ECfp4)
CHEMBL3905247	CHEMBL224	3	ppb2_NN(ECfp4) + NB(ECfp4)
CHEMBL3905247	CHEMBL234	5	ppb2_NN(ECfp4) + NB(ECfp4)
CHEMBL3905788	CHEMBL2835	2	ppb2_NN(ECfp4) + NB(ECfp4)
CHEMBL3905788	CHEMBL2971	3	ppb2_NN(ECfp4) + NB(ECfp4)
CHEMBL3906087	CHEMBL2835	2	ppb2_NN(ECfp4) + NB(ECfp4)
CHEMBL3906087	CHEMBL2971	3	ppb2_NN(ECfp4) + NB(ECfp4)
CHEMBL3906168	CHEMBL2835	2	ppb2_NN(ECfp4) + NB(ECfp4)
CHEMBL3906168	CHEMBL2971	3	ppb2_NN(ECfp4) + NB(ECfp4)
CHEMBL3906357	CHEMBL2147	2	ppb2_NN(ECfp4) + NB(ECfp4)
CHEMBL3906357	CHEMBL4523	4	ppb2_NN(ECfp4) + NB(ECfp4)
CHEMBL3906421	CHEMBL2147	2	ppb2_NN(ECfp4) + NB(ECfp4)
CHEMBL3906421	CHEMBL5407	8	ppb2_NN(ECfp4) + NB(ECfp4)
CHEMBL3906798	CHEMBL5407	1	ppb2_NN(ECfp4) + NB(ECfp4)
CHEMBL3906798	CHEMBL4523	2	ppb2_NN(ECfp4) + NB(ECfp4)
CHEMBL3906798	CHEMBL2147	3	ppb2_NN(ECfp4) + NB(ECfp4)
CHEMBL3906885	CHEMBL2148	1	ppb2_NN(ECfp4) + NB(ECfp4)
CHEMBL3906885	CHEMBL2971	7	ppb2_NN(ECfp4) + NB(ECfp4)
CHEMBL3906961	CHEMBL2971	3	ppb2_NN(ECfp4) + NB(ECfp4)
CHEMBL3906961	CHEMBL2835	5	ppb2_NN(ECfp4) + NB(ECfp4)
CHEMBL3907010	CHEMBL3105	1	ppb2_NN(ECfp4) + NB(ECfp4)
CHEMBL3907320	CHEMBL2147	2	ppb2_NN(ECfp4) + NB(ECfp4)
CHEMBL3907320	CHEMBL5407	10	ppb2_NN(ECfp4) + NB(ECfp4)
CHEMBL3907536	CHEMBL209	1	ppb2_NN(ECfp4) + NB(ECfp4)
CHEMBL3907536	CHEMBL1741195	2	ppb2_NN(ECfp4) + NB(ECfp4)
CHEMBL3907732	CHEMBL2147	1	ppb2_NN(ECfp4) + NB(ECfp4)
CHEMBL3908233	CHEMBL2835	2	ppb2_NN(ECfp4) + NB(ECfp4)
CHEMBL3908233	CHEMBL2971	3	ppb2_NN(ECfp4) + NB(ECfp4)
CHEMBL3908328	CHEMBL2971	2	ppb2_NN(ECfp4) + NB(ECfp4)
CHEMBL3908328	CHEMBL2835	3	ppb2_NN(ECfp4) + NB(ECfp4)
CHEMBL3908409	CHEMBL2835	2	ppb2_NN(ECfp4) + NB(ECfp4)
CHEMBL3908409	CHEMBL2971	3	ppb2_NN(ECfp4) + NB(ECfp4)
CHEMBL3909091	CHEMBL2971	2	ppb2_NN(ECfp4) + NB(ECfp4)
CHEMBL3909091	CHEMBL2835	3	ppb2_NN(ECfp4) + NB(ECfp4)
CHEMBL3909092	CHEMBL2835	5	ppb2_NN(ECfp4) + NB(ECfp4)
CHEMBL3909092	CHEMBL2971	9	ppb2_NN(ECfp4) + NB(ECfp4)
CHEMBL3909280	CHEMBL2147	4	ppb2_NN(ECfp4) + NB(ECfp4)
CHEMBL3909280	CHEMBL4523	6	ppb2_NN(ECfp4) + NB(ECfp4)
CHEMBL3909280	CHEMBL5407	7	ppb2_NN(ECfp4) + NB(ECfp4)
CHEMBL3909510	CHEMBL2835	2	ppb2_NN(ECfp4) + NB(ECfp4)
CHEMBL3909510	CHEMBL2971	3	ppb2_NN(ECfp4) + NB(ECfp4)
CHEMBL3909519	CHEMBL2835	2	ppb2_NN(ECfp4) + NB(ECfp4)
CHEMBL3909519	CHEMBL2971	3	ppb2_NN(ECfp4) + NB(ECfp4)
CHEMBL3909568	CHEMBL2835	2	ppb2_NN(ECfp4) + NB(ECfp4)
CHEMBL3909568	CHEMBL2971	8	ppb2_NN(ECfp4) + NB(ECfp4)
CHEMBL3909947	CHEMBL2147	3	ppb2_NN(ECfp4) + NB(ECfp4)
CHEMBL3910228	CHEMBL4822	1	ppb2_NN(ECfp4) + NB(ECfp4)
CHEMBL3910228	CHEMBL2525	2	ppb2_NN(ECfp4) + NB(ECfp4)
CHEMBL3911037	CHEMBL1945	1	ppb2_NN(ECfp4) + NB(ECfp4)
CHEMBL3911037	CHEMBL1946	4	ppb2_NN(ECfp4) + NB(ECfp4)
CHEMBL3911166	CHEMBL2835	2	ppb2_NN(ECfp4) + NB(ECfp4)
CHEMBL3911166	CHEMBL2971	3	ppb2_NN(ECfp4) + NB(ECfp4)
CHEMBL3911942	CHEMBL2835	2	ppb2_NN(ECfp4) + NB(ECfp4)
CHEMBL3911942	CHEMBL2971	3	ppb2_NN(ECfp4) + NB(ECfp4)
CHEMBL3912892	CHEMBL2835	2	ppb2_NN(ECfp4) + NB(ECfp4)
CHEMBL3912892	CHEMBL2971	7	ppb2_NN(ECfp4) + NB(ECfp4)
CHEMBL3912919	CHEMBL2835	2	ppb2_NN(ECfp4) + NB(ECfp4)
CHEMBL3912919	CHEMBL2971	3	ppb2_NN(ECfp4) + NB(ECfp4)
CHEMBL3913540	CHEMBL4523	2	ppb2_NN(ECfp4) + NB(ECfp4)
CHEMBL3913540	CHEMBL2147	3	ppb2_NN(ECfp4) + NB(ECfp4)
CHEMBL3913691	CHEMBL224	3	ppb2_NN(ECfp4) + NB(ECfp4)
CHEMBL3913691	CHEMBL234	9	ppb2_NN(ECfp4) + NB(ECfp4)
CHEMBL3913842	CHEMBL2835	2	ppb2_NN(ECfp4) + NB(ECfp4)
CHEMBL3913842	CHEMBL2971	3	ppb2_NN(ECfp4) + NB(ECfp4)
CHEMBL3914162	CHEMBL2835	2	ppb2_NN(ECfp4) + NB(ECfp4)
CHEMBL3914162	CHEMBL2971	3	ppb2_NN(ECfp4) + NB(ECfp4)
CHEMBL3914221	CHEMBL2835	3	ppb2_NN(ECfp4) + NB(ECfp4)
CHEMBL3914221	CHEMBL2971	4	ppb2_NN(ECfp4) + NB(ECfp4)
CHEMBL3914377	CHEMBL2835	2	ppb2_NN(ECfp4) + NB(ECfp4)
CHEMBL3914377	CHEMBL2971	3	ppb2_NN(ECfp4) + NB(ECfp4)
CHEMBL3914438	CHEMBL2148	1	ppb2_NN(ECfp4) + NB(ECfp4)
CHEMBL3914438	CHEMBL2971	2	ppb2_NN(ECfp4) + NB(ECfp4)
CHEMBL3914475	CHEMBL2148	1	ppb2_NN(ECfp4) + NB(ECfp4)
CHEMBL3914475	CHEMBL2835	9	ppb2_NN(ECfp4) + NB(ECfp4)
CHEMBL3914541	CHEMBL2835	2	ppb2_NN(ECfp4) + NB(ECfp4)
CHEMBL3914541	CHEMBL2971	8	ppb2_NN(ECfp4) + NB(ECfp4)
CHEMBL3914623	CHEMBL2835	3	ppb2_NN(ECfp4) + NB(ECfp4)
CHEMBL3914623	CHEMBL2971	4	ppb2_NN(ECfp4) + NB(ECfp4)
CHEMBL3914629	CHEMBL209	1	ppb2_NN(ECfp4) + NB(ECfp4)
CHEMBL3914629	CHEMBL1741195	2	ppb2_NN(ECfp4) + NB(ECfp4)
CHEMBL3914639	CHEMBL5407	2	ppb2_NN(ECfp4) + NB(ECfp4)
CHEMBL3914639	CHEMBL4523	3	ppb2_NN(ECfp4) + NB(ECfp4)
CHEMBL3914639	CHEMBL2147	4	ppb2_NN(ECfp4) + NB(ECfp4)
CHEMBL3915323	CHEMBL2147	9	ppb2_NN(ECfp4) + NB(ECfp4)
CHEMBL3915560	CHEMBL2835	3	ppb2_NN(ECfp4) + NB(ECfp4)
CHEMBL3915560	CHEMBL2971	4	ppb2_NN(ECfp4) + NB(ECfp4)
CHEMBL3915865	CHEMBL2835	3	ppb2_NN(ECfp4) + NB(ECfp4)
CHEMBL3915865	CHEMBL2971	4	ppb2_NN(ECfp4) + NB(ECfp4)
CHEMBL3915913	CHEMBL2147	1	ppb2_NN(ECfp4) + NB(ECfp4)
CHEMBL3915913	CHEMBL5407	5	ppb2_NN(ECfp4) + NB(ECfp4)
CHEMBL3915926	CHEMBL2835	2	ppb2_NN(ECfp4) + NB(ECfp4)
CHEMBL3915926	CHEMBL2971	4	ppb2_NN(ECfp4) + NB(ECfp4)
CHEMBL3915972	CHEMBL2835	2	ppb2_NN(ECfp4) + NB(ECfp4)
CHEMBL3915972	CHEMBL2971	5	ppb2_NN(ECfp4) + NB(ECfp4)
CHEMBL3916092	CHEMBL3629	3	ppb2_NN(ECfp4) + NB(ECfp4)
CHEMBL3916122	CHEMBL237	2	ppb2_NN(ECfp4) + NB(ECfp4)
CHEMBL3916122	CHEMBL233	3	ppb2_NN(ECfp4) + NB(ECfp4)
CHEMBL3916604	CHEMBL209	1	ppb2_NN(ECfp4) + NB(ECfp4)
CHEMBL3916604	CHEMBL1741195	2	ppb2_NN(ECfp4) + NB(ECfp4)
CHEMBL3916637	CHEMBL2835	2	ppb2_NN(ECfp4) + NB(ECfp4)
CHEMBL3916637	CHEMBL2971	3	ppb2_NN(ECfp4) + NB(ECfp4)
CHEMBL3916902	CHEMBL2147	1	ppb2_NN(ECfp4) + NB(ECfp4)
CHEMBL3916902	CHEMBL5407	9	ppb2_NN(ECfp4) + NB(ECfp4)
CHEMBL3916925	CHEMBL2835	2	ppb2_NN(ECfp4) + NB(ECfp4)
CHEMBL3916925	CHEMBL2971	3	ppb2_NN(ECfp4) + NB(ECfp4)
CHEMBL3916961	CHEMBL2722	2	ppb2_NN(ECfp4) + NB(ECfp4)
CHEMBL3916961	CHEMBL1908	3	ppb2_NN(ECfp4) + NB(ECfp4)
CHEMBL3917077	CHEMBL2147	1	ppb2_NN(ECfp4) + NB(ECfp4)
CHEMBL3917077	CHEMBL5407	5	ppb2_NN(ECfp4) + NB(ECfp4)
CHEMBL3917854	CHEMBL2835	1	ppb2_NN(ECfp4) + NB(ECfp4)
CHEMBL3917854	CHEMBL2971	7	ppb2_NN(ECfp4) + NB(ECfp4)
CHEMBL3917906	CHEMBL2148	2	ppb2_NN(ECfp4) + NB(ECfp4)
CHEMBL3917906	CHEMBL2835	6	ppb2_NN(ECfp4) + NB(ECfp4)
CHEMBL3917906	CHEMBL2971	10	ppb2_NN(ECfp4) + NB(ECfp4)
CHEMBL3918076	CHEMBL4523	2	ppb2_NN(ECfp4) + NB(ECfp4)
CHEMBL3918076	CHEMBL2147	3	ppb2_NN(ECfp4) + NB(ECfp4)
CHEMBL3918538	CHEMBL2835	2	ppb2_NN(ECfp4) + NB(ECfp4)
CHEMBL3918538	CHEMBL2971	5	ppb2_NN(ECfp4) + NB(ECfp4)
CHEMBL3918755	CHEMBL224	2	ppb2_NN(ECfp4) + NB(ECfp4)
CHEMBL3918755	CHEMBL217	3	ppb2_NN(ECfp4) + NB(ECfp4)
CHEMBL3919101	CHEMBL2971	1	ppb2_NN(ECfp4) + NB(ECfp4)
CHEMBL3919646	CHEMBL4523	2	ppb2_NN(ECfp4) + NB(ECfp4)
CHEMBL3919646	CHEMBL2147	3	ppb2_NN(ECfp4) + NB(ECfp4)
CHEMBL3919799	CHEMBL2148	1	ppb2_NN(ECfp4) + NB(ECfp4)
CHEMBL3919848	CHEMBL209	1	ppb2_NN(ECfp4) + NB(ECfp4)
CHEMBL3919848	CHEMBL1741195	2	ppb2_NN(ECfp4) + NB(ECfp4)
CHEMBL3920142	CHEMBL2835	2	ppb2_NN(ECfp4) + NB(ECfp4)
CHEMBL3920142	CHEMBL2971	3	ppb2_NN(ECfp4) + NB(ECfp4)
CHEMBL3920252	CHEMBL217	2	ppb2_NN(ECfp4) + NB(ECfp4)
CHEMBL3920252	CHEMBL224	3	ppb2_NN(ECfp4) + NB(ECfp4)
CHEMBL3920292	CHEMBL2835	2	ppb2_NN(ECfp4) + NB(ECfp4)
CHEMBL3920292	CHEMBL2971	3	ppb2_NN(ECfp4) + NB(ECfp4)
CHEMBL3920418	CHEMBL2835	1	ppb2_NN(ECfp4) + NB(ECfp4)
CHEMBL3920418	CHEMBL2971	3	ppb2_NN(ECfp4) + NB(ECfp4)
CHEMBL3920484	CHEMBL2148	1	ppb2_NN(ECfp4) + NB(ECfp4)
CHEMBL3920581	CHEMBL2148	1	ppb2_NN(ECfp4) + NB(ECfp4)
CHEMBL3920627	CHEMBL1741195	1	ppb2_NN(ECfp4) + NB(ECfp4)
CHEMBL3920627	CHEMBL209	2	ppb2_NN(ECfp4) + NB(ECfp4)
CHEMBL3920681	CHEMBL2148	1	ppb2_NN(ECfp4) + NB(ECfp4)
CHEMBL3920681	CHEMBL2835	3	ppb2_NN(ECfp4) + NB(ECfp4)
CHEMBL3920824	CHEMBL2835	2	ppb2_NN(ECfp4) + NB(ECfp4)
CHEMBL3920824	CHEMBL2971	3	ppb2_NN(ECfp4) + NB(ECfp4)
CHEMBL3921320	CHEMBL2148	1	ppb2_NN(ECfp4) + NB(ECfp4)
CHEMBL3921546	CHEMBL2835	2	ppb2_NN(ECfp4) + NB(ECfp4)
CHEMBL3921546	CHEMBL2971	3	ppb2_NN(ECfp4) + NB(ECfp4)
CHEMBL3921881	CHEMBL2835	1	ppb2_NN(ECfp4) + NB(ECfp4)
CHEMBL3921881	CHEMBL2971	3	ppb2_NN(ECfp4) + NB(ECfp4)
CHEMBL3921976	CHEMBL233	1	ppb2_NN(ECfp4) + NB(ECfp4)
CHEMBL3921976	CHEMBL2014	2	ppb2_NN(ECfp4) + NB(ECfp4)
CHEMBL3922782	CHEMBL2835	2	ppb2_NN(ECfp4) + NB(ECfp4)
CHEMBL3922782	CHEMBL2971	3	ppb2_NN(ECfp4) + NB(ECfp4)
CHEMBL3922831	CHEMBL2835	2	ppb2_NN(ECfp4) + NB(ECfp4)
CHEMBL3922831	CHEMBL2971	4	ppb2_NN(ECfp4) + NB(ECfp4)
CHEMBL3923240	CHEMBL224	2	ppb2_NN(ECfp4) + NB(ECfp4)
CHEMBL3924226	CHEMBL2835	2	ppb2_NN(ECfp4) + NB(ECfp4)
CHEMBL3924226	CHEMBL2971	4	ppb2_NN(ECfp4) + NB(ECfp4)
CHEMBL3924451	CHEMBL2971	2	ppb2_NN(ECfp4) + NB(ECfp4)
CHEMBL3924451	CHEMBL2835	3	ppb2_NN(ECfp4) + NB(ECfp4)
CHEMBL3924903	CHEMBL5407	2	ppb2_NN(ECfp4) + NB(ECfp4)
CHEMBL3924903	CHEMBL4523	3	ppb2_NN(ECfp4) + NB(ECfp4)
CHEMBL3924903	CHEMBL2147	4	ppb2_NN(ECfp4) + NB(ECfp4)
CHEMBL3925403	CHEMBL2147	5	ppb2_NN(ECfp4) + NB(ECfp4)
CHEMBL3925605	CHEMBL2148	1	ppb2_NN(ECfp4) + NB(ECfp4)
CHEMBL3925919	CHEMBL2835	2	ppb2_NN(ECfp4) + NB(ECfp4)
CHEMBL3925919	CHEMBL2971	4	ppb2_NN(ECfp4) + NB(ECfp4)
CHEMBL3925958	CHEMBL2835	3	ppb2_NN(ECfp4) + NB(ECfp4)
CHEMBL3925958	CHEMBL2971	5	ppb2_NN(ECfp4) + NB(ECfp4)
CHEMBL3926007	CHEMBL2147	2	ppb2_NN(ECfp4) + NB(ECfp4)
CHEMBL3926007	CHEMBL4523	3	ppb2_NN(ECfp4) + NB(ECfp4)
CHEMBL3926009	CHEMBL2835	2	ppb2_NN(ECfp4) + NB(ECfp4)
CHEMBL3926009	CHEMBL2971	3	ppb2_NN(ECfp4) + NB(ECfp4)
CHEMBL3926059	CHEMBL2148	1	ppb2_NN(ECfp4) + NB(ECfp4)
CHEMBL3926308	CHEMBL2835	2	ppb2_NN(ECfp4) + NB(ECfp4)
CHEMBL3926308	CHEMBL2971	4	ppb2_NN(ECfp4) + NB(ECfp4)
CHEMBL3926930	CHEMBL2148	1	ppb2_NN(ECfp4) + NB(ECfp4)
CHEMBL3926930	CHEMBL2971	5	ppb2_NN(ECfp4) + NB(ECfp4)
CHEMBL3927136	CHEMBL237	1	ppb2_NN(ECfp4) + NB(ECfp4)
CHEMBL3927136	CHEMBL233	4	ppb2_NN(ECfp4) + NB(ECfp4)
CHEMBL3927952	CHEMBL5407	5	ppb2_NN(ECfp4) + NB(ECfp4)
CHEMBL3928129	CHEMBL2835	4	ppb2_NN(ECfp4) + NB(ECfp4)
CHEMBL3928249	CHEMBL2835	4	ppb2_NN(ECfp4) + NB(ECfp4)
CHEMBL3928249	CHEMBL2971	5	ppb2_NN(ECfp4) + NB(ECfp4)
CHEMBL3928595	CHEMBL2147	1	ppb2_NN(ECfp4) + NB(ECfp4)
CHEMBL3928595	CHEMBL4523	3	ppb2_NN(ECfp4) + NB(ECfp4)
CHEMBL3929011	CHEMBL5407	1	ppb2_NN(ECfp4) + NB(ECfp4)
CHEMBL3929011	CHEMBL4523	2	ppb2_NN(ECfp4) + NB(ECfp4)
CHEMBL3929011	CHEMBL2147	3	ppb2_NN(ECfp4) + NB(ECfp4)
CHEMBL3929168	CHEMBL217	2	ppb2_NN(ECfp4) + NB(ECfp4)
CHEMBL3929168	CHEMBL224	4	ppb2_NN(ECfp4) + NB(ECfp4)
CHEMBL3929264	CHEMBL2147	2	ppb2_NN(ECfp4) + NB(ECfp4)
CHEMBL3929534	CHEMBL209	1	ppb2_NN(ECfp4) + NB(ECfp4)
CHEMBL3929534	CHEMBL1741195	2	ppb2_NN(ECfp4) + NB(ECfp4)
CHEMBL3929573	CHEMBL2835	2	ppb2_NN(ECfp4) + NB(ECfp4)
CHEMBL3929573	CHEMBL2971	4	ppb2_NN(ECfp4) + NB(ECfp4)
CHEMBL3929734	CHEMBL2835	1	ppb2_NN(ECfp4) + NB(ECfp4)
CHEMBL3929734	CHEMBL2971	3	ppb2_NN(ECfp4) + NB(ECfp4)
CHEMBL3930290	CHEMBL2148	1	ppb2_NN(ECfp4) + NB(ECfp4)
CHEMBL3930305	CHEMBL2835	5	ppb2_NN(ECfp4) + NB(ECfp4)
CHEMBL3930515	CHEMBL2722	1	ppb2_NN(ECfp4) + NB(ECfp4)
CHEMBL3930515	CHEMBL1908	2	ppb2_NN(ECfp4) + NB(ECfp4)
CHEMBL3930620	CHEMBL325	1	ppb2_NN(ECfp4) + NB(ECfp4)
CHEMBL3930712	CHEMBL2148	1	ppb2_NN(ECfp4) + NB(ECfp4)
CHEMBL3930712	CHEMBL2835	5	ppb2_NN(ECfp4) + NB(ECfp4)
CHEMBL3931274	CHEMBL2147	5	ppb2_NN(ECfp4) + NB(ECfp4)
CHEMBL3931278	CHEMBL2835	2	ppb2_NN(ECfp4) + NB(ECfp4)
CHEMBL3931278	CHEMBL2971	4	ppb2_NN(ECfp4) + NB(ECfp4)
CHEMBL3931279	CHEMBL2147	1	ppb2_NN(ECfp4) + NB(ECfp4)
CHEMBL3931279	CHEMBL5407	4	ppb2_NN(ECfp4) + NB(ECfp4)
CHEMBL3931819	CHEMBL2835	2	ppb2_NN(ECfp4) + NB(ECfp4)
CHEMBL3931819	CHEMBL2971	3	ppb2_NN(ECfp4) + NB(ECfp4)
CHEMBL3932460	CHEMBL4523	1	ppb2_NN(ECfp4) + NB(ECfp4)
CHEMBL3932460	CHEMBL2147	3	ppb2_NN(ECfp4) + NB(ECfp4)
CHEMBL3932623	CHEMBL2835	2	ppb2_NN(ECfp4) + NB(ECfp4)
CHEMBL3932623	CHEMBL2971	3	ppb2_NN(ECfp4) + NB(ECfp4)
CHEMBL3932881	CHEMBL2835	2	ppb2_NN(ECfp4) + NB(ECfp4)
CHEMBL3932881	CHEMBL2971	4	ppb2_NN(ECfp4) + NB(ECfp4)
CHEMBL3933766	CHEMBL2835	1	ppb2_NN(ECfp4) + NB(ECfp4)
CHEMBL3933766	CHEMBL2971	4	ppb2_NN(ECfp4) + NB(ECfp4)
CHEMBL3933868	CHEMBL2147	1	ppb2_NN(ECfp4) + NB(ECfp4)
CHEMBL3933868	CHEMBL5407	2	ppb2_NN(ECfp4) + NB(ECfp4)
CHEMBL3934335	CHEMBL2835	3	ppb2_NN(ECfp4) + NB(ECfp4)
CHEMBL3934383	CHEMBL2147	4	ppb2_NN(ECfp4) + NB(ECfp4)
CHEMBL3934709	CHEMBL2835	2	ppb2_NN(ECfp4) + NB(ECfp4)
CHEMBL3934709	CHEMBL2971	3	ppb2_NN(ECfp4) + NB(ECfp4)
CHEMBL3934942	CHEMBL2148	1	ppb2_NN(ECfp4) + NB(ECfp4)
CHEMBL3934963	CHEMBL2835	3	ppb2_NN(ECfp4) + NB(ECfp4)
CHEMBL3935018	CHEMBL5407	1	ppb2_NN(ECfp4) + NB(ECfp4)
CHEMBL3935018	CHEMBL2147	3	ppb2_NN(ECfp4) + NB(ECfp4)
CHEMBL3935018	CHEMBL4523	4	ppb2_NN(ECfp4) + NB(ECfp4)
CHEMBL3935096	CHEMBL5407	1	ppb2_NN(ECfp4) + NB(ECfp4)
CHEMBL3935096	CHEMBL4523	2	ppb2_NN(ECfp4) + NB(ECfp4)
CHEMBL3935096	CHEMBL2147	3	ppb2_NN(ECfp4) + NB(ECfp4)
CHEMBL3935396	CHEMBL2835	2	ppb2_NN(ECfp4) + NB(ECfp4)
CHEMBL3935396	CHEMBL2971	4	ppb2_NN(ECfp4) + NB(ECfp4)
CHEMBL3936320	CHEMBL4523	2	ppb2_NN(ECfp4) + NB(ECfp4)
CHEMBL3936320	CHEMBL2147	3	ppb2_NN(ECfp4) + NB(ECfp4)
CHEMBL3936541	CHEMBL2835	3	ppb2_NN(ECfp4) + NB(ECfp4)
CHEMBL3936990	CHEMBL4282	4	ppb2_NN(ECfp4) + NB(ECfp4)
CHEMBL3936992	CHEMBL2147	1	ppb2_NN(ECfp4) + NB(ECfp4)
CHEMBL3936992	CHEMBL4523	2	ppb2_NN(ECfp4) + NB(ECfp4)
CHEMBL3937034	CHEMBL2147	1	ppb2_NN(ECfp4) + NB(ECfp4)
CHEMBL3937195	CHEMBL2835	2	ppb2_NN(ECfp4) + NB(ECfp4)
CHEMBL3937195	CHEMBL2971	3	ppb2_NN(ECfp4) + NB(ECfp4)
CHEMBL3937204	CHEMBL2148	1	ppb2_NN(ECfp4) + NB(ECfp4)
CHEMBL3937204	CHEMBL2971	5	ppb2_NN(ECfp4) + NB(ECfp4)
CHEMBL3937222	CHEMBL209	1	ppb2_NN(ECfp4) + NB(ECfp4)
CHEMBL3937222	CHEMBL1741195	2	ppb2_NN(ECfp4) + NB(ECfp4)
CHEMBL3937835	CHEMBL2148	1	ppb2_NN(ECfp4) + NB(ECfp4)
CHEMBL3937878	CHEMBL2971	2	ppb2_NN(ECfp4) + NB(ECfp4)
CHEMBL3937878	CHEMBL2835	3	ppb2_NN(ECfp4) + NB(ECfp4)
CHEMBL3937898	CHEMBL2835	2	ppb2_NN(ECfp4) + NB(ECfp4)
CHEMBL3937898	CHEMBL2971	5	ppb2_NN(ECfp4) + NB(ECfp4)
CHEMBL3937927	CHEMBL2835	2	ppb2_NN(ECfp4) + NB(ECfp4)
CHEMBL3937927	CHEMBL2971	4	ppb2_NN(ECfp4) + NB(ECfp4)
CHEMBL3938210	CHEMBL217	2	ppb2_NN(ECfp4) + NB(ECfp4)
CHEMBL3938210	CHEMBL224	3	ppb2_NN(ECfp4) + NB(ECfp4)
CHEMBL3938583	CHEMBL2147	3	ppb2_NN(ECfp4) + NB(ECfp4)
CHEMBL3938660	CHEMBL2835	2	ppb2_NN(ECfp4) + NB(ECfp4)
CHEMBL3938660	CHEMBL2971	3	ppb2_NN(ECfp4) + NB(ECfp4)
CHEMBL3938720	CHEMBL2835	2	ppb2_NN(ECfp4) + NB(ECfp4)
CHEMBL3938720	CHEMBL2971	3	ppb2_NN(ECfp4) + NB(ECfp4)
CHEMBL3939101	CHEMBL2147	3	ppb2_NN(ECfp4) + NB(ECfp4)
CHEMBL3939101	CHEMBL5407	4	ppb2_NN(ECfp4) + NB(ECfp4)
CHEMBL3939394	CHEMBL2147	2	ppb2_NN(ECfp4) + NB(ECfp4)
CHEMBL3939394	CHEMBL5407	4	ppb2_NN(ECfp4) + NB(ECfp4)
CHEMBL3939580	CHEMBL2835	1	ppb2_NN(ECfp4) + NB(ECfp4)
CHEMBL3939580	CHEMBL2148	2	ppb2_NN(ECfp4) + NB(ECfp4)
CHEMBL3939892	CHEMBL2835	2	ppb2_NN(ECfp4) + NB(ECfp4)
CHEMBL3939892	CHEMBL2971	3	ppb2_NN(ECfp4) + NB(ECfp4)
CHEMBL3940227	CHEMBL2147	1	ppb2_NN(ECfp4) + NB(ECfp4)
CHEMBL3940712	CHEMBL224	3	ppb2_NN(ECfp4) + NB(ECfp4)
CHEMBL3940744	CHEMBL5407	2	ppb2_NN(ECfp4) + NB(ECfp4)
CHEMBL3940744	CHEMBL4523	3	ppb2_NN(ECfp4) + NB(ECfp4)
CHEMBL3940744	CHEMBL2147	4	ppb2_NN(ECfp4) + NB(ECfp4)
CHEMBL3940929	CHEMBL2835	2	ppb2_NN(ECfp4) + NB(ECfp4)
CHEMBL3940929	CHEMBL2971	5	ppb2_NN(ECfp4) + NB(ECfp4)
CHEMBL3941202	CHEMBL2835	1	ppb2_NN(ECfp4) + NB(ECfp4)
CHEMBL3941202	CHEMBL2971	2	ppb2_NN(ECfp4) + NB(ECfp4)
CHEMBL3941211	CHEMBL2148	1	ppb2_NN(ECfp4) + NB(ECfp4)
CHEMBL3942446	CHEMBL2147	1	ppb2_NN(ECfp4) + NB(ECfp4)
CHEMBL3942542	CHEMBL2835	5	ppb2_NN(ECfp4) + NB(ECfp4)
CHEMBL3942619	CHEMBL262	2	ppb2_NN(ECfp4) + NB(ECfp4)
CHEMBL3943096	CHEMBL1741195	1	ppb2_NN(ECfp4) + NB(ECfp4)
CHEMBL3943096	CHEMBL209	2	ppb2_NN(ECfp4) + NB(ECfp4)
CHEMBL3943705	CHEMBL2147	1	ppb2_NN(ECfp4) + NB(ECfp4)
CHEMBL3943705	CHEMBL4523	2	ppb2_NN(ECfp4) + NB(ECfp4)
CHEMBL3943705	CHEMBL5407	4	ppb2_NN(ECfp4) + NB(ECfp4)
CHEMBL3943759	CHEMBL5407	1	ppb2_NN(ECfp4) + NB(ECfp4)
CHEMBL3943759	CHEMBL2147	2	ppb2_NN(ECfp4) + NB(ECfp4)
CHEMBL3944062	CHEMBL2147	1	ppb2_NN(ECfp4) + NB(ECfp4)
CHEMBL3944062	CHEMBL5407	2	ppb2_NN(ECfp4) + NB(ECfp4)
CHEMBL3944062	CHEMBL4523	4	ppb2_NN(ECfp4) + NB(ECfp4)
CHEMBL3945832	CHEMBL3231	2	ppb2_NN(ECfp4) + NB(ECfp4)
CHEMBL3945832	CHEMBL2973	4	ppb2_NN(ECfp4) + NB(ECfp4)
CHEMBL3946306	CHEMBL2147	1	ppb2_NN(ECfp4) + NB(ECfp4)
CHEMBL3946970	CHEMBL2147	1	ppb2_NN(ECfp4) + NB(ECfp4)
CHEMBL3946970	CHEMBL4523	3	ppb2_NN(ECfp4) + NB(ECfp4)
CHEMBL3947292	CHEMBL2835	1	ppb2_NN(ECfp4) + NB(ECfp4)
CHEMBL3947292	CHEMBL2971	3	ppb2_NN(ECfp4) + NB(ECfp4)
CHEMBL3947309	CHEMBL2147	1	ppb2_NN(ECfp4) + NB(ECfp4)
CHEMBL3947456	CHEMBL2835	2	ppb2_NN(ECfp4) + NB(ECfp4)
CHEMBL3947456	CHEMBL2971	3	ppb2_NN(ECfp4) + NB(ECfp4)
CHEMBL3947484	CHEMBL2147	2	ppb2_NN(ECfp4) + NB(ECfp4)
CHEMBL3947770	CHEMBL2147	2	ppb2_NN(ECfp4) + NB(ECfp4)
CHEMBL3947977	CHEMBL2835	2	ppb2_NN(ECfp4) + NB(ECfp4)
CHEMBL3948039	CHEMBL2971	2	ppb2_NN(ECfp4) + NB(ECfp4)
CHEMBL3948039	CHEMBL2835	3	ppb2_NN(ECfp4) + NB(ECfp4)
CHEMBL3948056	CHEMBL224	2	ppb2_NN(ECfp4) + NB(ECfp4)
CHEMBL3948056	CHEMBL217	3	ppb2_NN(ECfp4) + NB(ECfp4)
CHEMBL3948591	CHEMBL2835	2	ppb2_NN(ECfp4) + NB(ECfp4)
CHEMBL3948713	CHEMBL233	1	ppb2_NN(ECfp4) + NB(ECfp4)
CHEMBL3948713	CHEMBL237	3	ppb2_NN(ECfp4) + NB(ECfp4)
CHEMBL3949310	CHEMBL2835	1	ppb2_NN(ECfp4) + NB(ECfp4)
CHEMBL3950143	CHEMBL2835	3	ppb2_NN(ECfp4) + NB(ECfp4)
CHEMBL3950269	CHEMBL5407	1	ppb2_NN(ECfp4) + NB(ECfp4)
CHEMBL3950981	CHEMBL2835	2	ppb2_NN(ECfp4) + NB(ECfp4)
CHEMBL3950981	CHEMBL2971	3	ppb2_NN(ECfp4) + NB(ECfp4)
CHEMBL3951001	CHEMBL209	1	ppb2_NN(ECfp4) + NB(ECfp4)
CHEMBL3951001	CHEMBL1741195	2	ppb2_NN(ECfp4) + NB(ECfp4)
CHEMBL3951088	CHEMBL2147	1	ppb2_NN(ECfp4) + NB(ECfp4)
CHEMBL3951198	CHEMBL1741195	1	ppb2_NN(ECfp4) + NB(ECfp4)
CHEMBL3951198	CHEMBL209	2	ppb2_NN(ECfp4) + NB(ECfp4)
CHEMBL3951741	CHEMBL2147	1	ppb2_NN(ECfp4) + NB(ECfp4)
CHEMBL3951741	CHEMBL5407	3	ppb2_NN(ECfp4) + NB(ECfp4)
CHEMBL3951874	CHEMBL2835	2	ppb2_NN(ECfp4) + NB(ECfp4)
CHEMBL3951874	CHEMBL2971	3	ppb2_NN(ECfp4) + NB(ECfp4)
CHEMBL3951947	CHEMBL2835	2	ppb2_NN(ECfp4) + NB(ECfp4)
CHEMBL3952022	CHEMBL2971	2	ppb2_NN(ECfp4) + NB(ECfp4)
CHEMBL3952022	CHEMBL2835	3	ppb2_NN(ECfp4) + NB(ECfp4)
CHEMBL3952029	CHEMBL2835	2	ppb2_NN(ECfp4) + NB(ECfp4)
CHEMBL3952360	CHEMBL2147	3	ppb2_NN(ECfp4) + NB(ECfp4)
CHEMBL3952555	CHEMBL2148	1	ppb2_NN(ECfp4) + NB(ECfp4)
CHEMBL3952845	CHEMBL5407	1	ppb2_NN(ECfp4) + NB(ECfp4)
CHEMBL3952845	CHEMBL2147	3	ppb2_NN(ECfp4) + NB(ECfp4)
CHEMBL3953164	CHEMBL5407	1	ppb2_NN(ECfp4) + NB(ECfp4)
CHEMBL3953164	CHEMBL4523	3	ppb2_NN(ECfp4) + NB(ECfp4)
CHEMBL3953482	CHEMBL2147	1	ppb2_NN(ECfp4) + NB(ECfp4)
CHEMBL3953947	CHEMBL2835	2	ppb2_NN(ECfp4) + NB(ECfp4)
CHEMBL3954558	CHEMBL2148	1	ppb2_NN(ECfp4) + NB(ECfp4)
CHEMBL3954782	CHEMBL237	1	ppb2_NN(ECfp4) + NB(ECfp4)
CHEMBL3956075	CHEMBL2835	2	ppb2_NN(ECfp4) + NB(ECfp4)
CHEMBL3956075	CHEMBL2971	3	ppb2_NN(ECfp4) + NB(ECfp4)
CHEMBL3956152	CHEMBL2835	2	ppb2_NN(ECfp4) + NB(ECfp4)
CHEMBL3956152	CHEMBL2971	3	ppb2_NN(ECfp4) + NB(ECfp4)
CHEMBL3956440	CHEMBL2147	3	ppb2_NN(ECfp4) + NB(ECfp4)
CHEMBL3956529	CHEMBL2835	2	ppb2_NN(ECfp4) + NB(ECfp4)
CHEMBL3956628	CHEMBL2835	3	ppb2_NN(ECfp4) + NB(ECfp4)
CHEMBL3956651	CHEMBL2835	2	ppb2_NN(ECfp4) + NB(ECfp4)
CHEMBL3956651	CHEMBL2971	3	ppb2_NN(ECfp4) + NB(ECfp4)
CHEMBL3956717	CHEMBL2147	2	ppb2_NN(ECfp4) + NB(ECfp4)
CHEMBL3956720	CHEMBL217	2	ppb2_NN(ECfp4) + NB(ECfp4)
CHEMBL3956720	CHEMBL224	3	ppb2_NN(ECfp4) + NB(ECfp4)
CHEMBL3956882	CHEMBL2971	3	ppb2_NN(ECfp4) + NB(ECfp4)
CHEMBL3957106	CHEMBL209	1	ppb2_NN(ECfp4) + NB(ECfp4)
CHEMBL3957106	CHEMBL1741195	2	ppb2_NN(ECfp4) + NB(ECfp4)
CHEMBL3957132	CHEMBL2835	3	ppb2_NN(ECfp4) + NB(ECfp4)
CHEMBL3957195	CHEMBL2835	2	ppb2_NN(ECfp4) + NB(ECfp4)
CHEMBL3957231	CHEMBL2835	2	ppb2_NN(ECfp4) + NB(ECfp4)
CHEMBL3957231	CHEMBL2971	3	ppb2_NN(ECfp4) + NB(ECfp4)
CHEMBL3957954	CHEMBL2147	2	ppb2_NN(ECfp4) + NB(ECfp4)
CHEMBL3957997	CHEMBL2147	1	ppb2_NN(ECfp4) + NB(ECfp4)
CHEMBL3958253	CHEMBL5407	1	ppb2_NN(ECfp4) + NB(ECfp4)
CHEMBL3958307	CHEMBL2147	1	ppb2_NN(ECfp4) + NB(ECfp4)
CHEMBL3958307	CHEMBL4523	2	ppb2_NN(ECfp4) + NB(ECfp4)
CHEMBL3958691	CHEMBL2835	3	ppb2_NN(ECfp4) + NB(ECfp4)
CHEMBL3958785	CHEMBL2147	1	ppb2_NN(ECfp4) + NB(ECfp4)
CHEMBL3958785	CHEMBL5407	2	ppb2_NN(ECfp4) + NB(ECfp4)
CHEMBL3958969	CHEMBL280	1	ppb2_NN(ECfp4) + NB(ECfp4)
CHEMBL3958969	CHEMBL333	3	ppb2_NN(ECfp4) + NB(ECfp4)
CHEMBL3959266	CHEMBL2835	2	ppb2_NN(ECfp4) + NB(ECfp4)
CHEMBL3959266	CHEMBL2971	3	ppb2_NN(ECfp4) + NB(ECfp4)
CHEMBL3959398	CHEMBL233	2	ppb2_NN(ECfp4) + NB(ECfp4)
CHEMBL3959433	CHEMBL2835	1	ppb2_NN(ECfp4) + NB(ECfp4)
CHEMBL3959433	CHEMBL2971	3	ppb2_NN(ECfp4) + NB(ECfp4)
CHEMBL3959924	CHEMBL2835	2	ppb2_NN(ECfp4) + NB(ECfp4)
CHEMBL3960213	CHEMBL2148	1	ppb2_NN(ECfp4) + NB(ECfp4)
CHEMBL3960416	CHEMBL2148	1	ppb2_NN(ECfp4) + NB(ECfp4)
CHEMBL3960554	CHEMBL5407	1	ppb2_NN(ECfp4) + NB(ECfp4)
CHEMBL3960554	CHEMBL2147	2	ppb2_NN(ECfp4) + NB(ECfp4)
CHEMBL3960554	CHEMBL4523	3	ppb2_NN(ECfp4) + NB(ECfp4)
CHEMBL3960785	CHEMBL224	2	ppb2_NN(ECfp4) + NB(ECfp4)
CHEMBL3960785	CHEMBL217	3	ppb2_NN(ECfp4) + NB(ECfp4)
CHEMBL3961360	CHEMBL2147	1	ppb2_NN(ECfp4) + NB(ECfp4)
CHEMBL3961360	CHEMBL5407	3	ppb2_NN(ECfp4) + NB(ECfp4)
CHEMBL3961393	CHEMBL2835	2	ppb2_NN(ECfp4) + NB(ECfp4)
CHEMBL3961525	CHEMBL2147	1	ppb2_NN(ECfp4) + NB(ECfp4)
CHEMBL3961692	CHEMBL2147	1	ppb2_NN(ECfp4) + NB(ECfp4)
CHEMBL3961692	CHEMBL4523	2	ppb2_NN(ECfp4) + NB(ECfp4)
CHEMBL3961692	CHEMBL5407	3	ppb2_NN(ECfp4) + NB(ECfp4)
CHEMBL3961850	CHEMBL2148	1	ppb2_NN(ECfp4) + NB(ECfp4)
CHEMBL3962342	CHEMBL2971	2	ppb2_NN(ECfp4) + NB(ECfp4)
CHEMBL3962342	CHEMBL2835	3	ppb2_NN(ECfp4) + NB(ECfp4)
CHEMBL3962386	CHEMBL2835	1	ppb2_NN(ECfp4) + NB(ECfp4)
CHEMBL3962386	CHEMBL2971	2	ppb2_NN(ECfp4) + NB(ECfp4)
CHEMBL3962448	CHEMBL2148	1	ppb2_NN(ECfp4) + NB(ECfp4)
CHEMBL3962506	CHEMBL2835	1	ppb2_NN(ECfp4) + NB(ECfp4)
CHEMBL3962525	CHEMBL224	2	ppb2_NN(ECfp4) + NB(ECfp4)
CHEMBL3963191	CHEMBL2835	2	ppb2_NN(ECfp4) + NB(ECfp4)
CHEMBL3963191	CHEMBL2971	3	ppb2_NN(ECfp4) + NB(ECfp4)
CHEMBL3963271	CHEMBL2835	2	ppb2_NN(ECfp4) + NB(ECfp4)
CHEMBL3963271	CHEMBL2971	3	ppb2_NN(ECfp4) + NB(ECfp4)
CHEMBL3963779	CHEMBL2835	2	ppb2_NN(ECfp4) + NB(ECfp4)
CHEMBL3963946	CHEMBL5407	1	ppb2_NN(ECfp4) + NB(ECfp4)
CHEMBL3963946	CHEMBL2147	3	ppb2_NN(ECfp4) + NB(ECfp4)
CHEMBL3964279	CHEMBL2835	2	ppb2_NN(ECfp4) + NB(ECfp4)
CHEMBL3964598	CHEMBL233	1	ppb2_NN(ECfp4) + NB(ECfp4)
CHEMBL3964598	CHEMBL237	3	ppb2_NN(ECfp4) + NB(ECfp4)
CHEMBL3964801	CHEMBL2835	2	ppb2_NN(ECfp4) + NB(ECfp4)
CHEMBL3964990	CHEMBL2835	2	ppb2_NN(ECfp4) + NB(ECfp4)
CHEMBL3965069	CHEMBL209	1	ppb2_NN(ECfp4) + NB(ECfp4)
CHEMBL3965069	CHEMBL1741195	2	ppb2_NN(ECfp4) + NB(ECfp4)
CHEMBL3965297	CHEMBL4523	2	ppb2_NN(ECfp4) + NB(ECfp4)
CHEMBL3965297	CHEMBL2147	3	ppb2_NN(ECfp4) + NB(ECfp4)
CHEMBL3965741	CHEMBL2147	2	ppb2_NN(ECfp4) + NB(ECfp4)
CHEMBL3965757	CHEMBL4523	2	ppb2_NN(ECfp4) + NB(ECfp4)
CHEMBL3965757	CHEMBL2147	3	ppb2_NN(ECfp4) + NB(ECfp4)
CHEMBL3965809	CHEMBL2835	2	ppb2_NN(ECfp4) + NB(ECfp4)
CHEMBL3965809	CHEMBL2971	3	ppb2_NN(ECfp4) + NB(ECfp4)
CHEMBL3965946	CHEMBL4523	2	ppb2_NN(ECfp4) + NB(ECfp4)
CHEMBL3965946	CHEMBL2147	3	ppb2_NN(ECfp4) + NB(ECfp4)
CHEMBL3966363	CHEMBL2147	1	ppb2_NN(ECfp4) + NB(ECfp4)
CHEMBL3966363	CHEMBL4523	3	ppb2_NN(ECfp4) + NB(ECfp4)
CHEMBL3966696	CHEMBL5407	1	ppb2_NN(ECfp4) + NB(ECfp4)
CHEMBL3966732	CHEMBL4523	2	ppb2_NN(ECfp4) + NB(ECfp4)
CHEMBL3966732	CHEMBL2147	3	ppb2_NN(ECfp4) + NB(ECfp4)
CHEMBL3966830	CHEMBL233	1	ppb2_NN(ECfp4) + NB(ECfp4)
CHEMBL3966830	CHEMBL237	2	ppb2_NN(ECfp4) + NB(ECfp4)
CHEMBL3966842	CHEMBL217	2	ppb2_NN(ECfp4) + NB(ECfp4)
CHEMBL3966842	CHEMBL224	3	ppb2_NN(ECfp4) + NB(ECfp4)
CHEMBL3967830	CHEMBL2835	2	ppb2_NN(ECfp4) + NB(ECfp4)
CHEMBL3967830	CHEMBL2971	3	ppb2_NN(ECfp4) + NB(ECfp4)
CHEMBL3968206	CHEMBL2147	2	ppb2_NN(ECfp4) + NB(ECfp4)
CHEMBL3968315	CHEMBL2835	2	ppb2_NN(ECfp4) + NB(ECfp4)
CHEMBL3968315	CHEMBL2971	3	ppb2_NN(ECfp4) + NB(ECfp4)
CHEMBL3968781	CHEMBL2835	2	ppb2_NN(ECfp4) + NB(ECfp4)
CHEMBL3968925	CHEMBL4005	1	ppb2_NN(ECfp4) + NB(ECfp4)
CHEMBL3968925	CHEMBL3267	3	ppb2_NN(ECfp4) + NB(ECfp4)
CHEMBL3969155	CHEMBL237	1	ppb2_NN(ECfp4) + NB(ECfp4)
CHEMBL3969253	CHEMBL2971	1	ppb2_NN(ECfp4) + NB(ECfp4)
CHEMBL3970360	CHEMBL2835	2	ppb2_NN(ECfp4) + NB(ECfp4)
CHEMBL3970779	CHEMBL2835	2	ppb2_NN(ECfp4) + NB(ECfp4)
CHEMBL3970953	CHEMBL5407	1	ppb2_NN(ECfp4) + NB(ECfp4)
CHEMBL3970953	CHEMBL2147	2	ppb2_NN(ECfp4) + NB(ECfp4)
CHEMBL3970953	CHEMBL4523	3	ppb2_NN(ECfp4) + NB(ECfp4)
CHEMBL3970981	CHEMBL2147	1	ppb2_NN(ECfp4) + NB(ECfp4)
CHEMBL3971083	CHEMBL2835	2	ppb2_NN(ECfp4) + NB(ECfp4)
CHEMBL3971083	CHEMBL2971	3	ppb2_NN(ECfp4) + NB(ECfp4)
CHEMBL3971538	CHEMBL1945	1	ppb2_NN(ECfp4) + NB(ECfp4)
CHEMBL3971672	CHEMBL2835	2	ppb2_NN(ECfp4) + NB(ECfp4)
CHEMBL3971672	CHEMBL2971	3	ppb2_NN(ECfp4) + NB(ECfp4)
CHEMBL3971907	CHEMBL224	2	ppb2_NN(ECfp4) + NB(ECfp4)
CHEMBL3971907	CHEMBL217	3	ppb2_NN(ECfp4) + NB(ECfp4)
CHEMBL3972050	CHEMBL2147	2	ppb2_NN(ECfp4) + NB(ECfp4)
CHEMBL3972453	CHEMBL2147	1	ppb2_NN(ECfp4) + NB(ECfp4)
CHEMBL3972612	CHEMBL2835	2	ppb2_NN(ECfp4) + NB(ECfp4)
CHEMBL3972830	CHEMBL2835	3	ppb2_NN(ECfp4) + NB(ECfp4)
CHEMBL3973544	CHEMBL5407	3	ppb2_NN(ECfp4) + NB(ECfp4)
CHEMBL3973547	CHEMBL2835	2	ppb2_NN(ECfp4) + NB(ECfp4)
CHEMBL3973547	CHEMBL2971	3	ppb2_NN(ECfp4) + NB(ECfp4)
CHEMBL3973848	CHEMBL2148	1	ppb2_NN(ECfp4) + NB(ECfp4)
CHEMBL3974857	CHEMBL237	2	ppb2_NN(ECfp4) + NB(ECfp4)
CHEMBL3975046	CHEMBL2835	1	ppb2_NN(ECfp4) + NB(ECfp4)
CHEMBL3975046	CHEMBL2971	3	ppb2_NN(ECfp4) + NB(ECfp4)
CHEMBL3975198	CHEMBL5407	1	ppb2_NN(ECfp4) + NB(ECfp4)
CHEMBL3975506	CHEMBL2835	2	ppb2_NN(ECfp4) + NB(ECfp4)
CHEMBL3975756	CHEMBL2147	1	ppb2_NN(ECfp4) + NB(ECfp4)
CHEMBL3975756	CHEMBL5407	3	ppb2_NN(ECfp4) + NB(ECfp4)
CHEMBL3975764	CHEMBL2147	1	ppb2_NN(ECfp4) + NB(ECfp4)
CHEMBL3975764	CHEMBL5407	3	ppb2_NN(ECfp4) + NB(ECfp4)
CHEMBL3975787	CHEMBL2147	2	ppb2_NN(ECfp4) + NB(ECfp4)
CHEMBL3976267	CHEMBL5407	1	ppb2_NN(ECfp4) + NB(ECfp4)
CHEMBL3976267	CHEMBL4523	2	ppb2_NN(ECfp4) + NB(ECfp4)
CHEMBL3976282	CHEMBL217	2	ppb2_NN(ECfp4) + NB(ECfp4)
CHEMBL3976282	CHEMBL224	3	ppb2_NN(ECfp4) + NB(ECfp4)
CHEMBL3976307	CHEMBL2835	3	ppb2_NN(ECfp4) + NB(ECfp4)
CHEMBL3977158	CHEMBL3629	1	ppb2_NN(ECfp4) + NB(ECfp4)
CHEMBL3977237	CHEMBL2835	1	ppb2_NN(ECfp4) + NB(ECfp4)
CHEMBL3977452	CHEMBL2148	1	ppb2_NN(ECfp4) + NB(ECfp4)
CHEMBL3977509	CHEMBL2148	1	ppb2_NN(ECfp4) + NB(ECfp4)
CHEMBL3980040	CHEMBL2147	1	ppb2_NN(ECfp4) + NB(ECfp4)
CHEMBL3980778	CHEMBL2835	1	ppb2_NN(ECfp4) + NB(ECfp4)
CHEMBL3980778	CHEMBL2148	2	ppb2_NN(ECfp4) + NB(ECfp4)
CHEMBL3980864	CHEMBL237	1	ppb2_NN(ECfp4) + NB(ECfp4)
CHEMBL3980864	CHEMBL233	3	ppb2_NN(ECfp4) + NB(ECfp4)
CHEMBL3981057	CHEMBL1945	1	ppb2_NN(ECfp4) + NB(ECfp4)
CHEMBL3981144	CHEMBL2835	2	ppb2_NN(ECfp4) + NB(ECfp4)
CHEMBL3981144	CHEMBL2971	3	ppb2_NN(ECfp4) + NB(ECfp4)
CHEMBL3981187	CHEMBL2835	2	ppb2_NN(ECfp4) + NB(ECfp4)
CHEMBL3981187	CHEMBL2971	3	ppb2_NN(ECfp4) + NB(ECfp4)
CHEMBL3982255	CHEMBL2148	1	ppb2_NN(ECfp4) + NB(ECfp4)
CHEMBL3982307	CHEMBL2148	1	ppb2_NN(ECfp4) + NB(ECfp4)
CHEMBL3982408	CHEMBL2835	2	ppb2_NN(ECfp4) + NB(ECfp4)
CHEMBL3982408	CHEMBL2971	3	ppb2_NN(ECfp4) + NB(ECfp4)
CHEMBL3982418	CHEMBL2722	2	ppb2_NN(ECfp4) + NB(ECfp4)
CHEMBL3982418	CHEMBL1908	3	ppb2_NN(ECfp4) + NB(ECfp4)
CHEMBL3982486	CHEMBL224	2	ppb2_NN(ECfp4) + NB(ECfp4)
CHEMBL3982486	CHEMBL217	3	ppb2_NN(ECfp4) + NB(ECfp4)
CHEMBL3982539	CHEMBL5407	1	ppb2_NN(ECfp4) + NB(ECfp4)
CHEMBL3982539	CHEMBL2147	2	ppb2_NN(ECfp4) + NB(ECfp4)
CHEMBL3983040	CHEMBL2971	3	ppb2_NN(ECfp4) + NB(ECfp4)
CHEMBL3983256	CHEMBL2971	2	ppb2_NN(ECfp4) + NB(ECfp4)
CHEMBL3983256	CHEMBL2835	3	ppb2_NN(ECfp4) + NB(ECfp4)
CHEMBL3983351	CHEMBL2147	2	ppb2_NN(ECfp4) + NB(ECfp4)
CHEMBL3983983	CHEMBL2835	2	ppb2_NN(ECfp4) + NB(ECfp4)
CHEMBL3983983	CHEMBL2971	3	ppb2_NN(ECfp4) + NB(ECfp4)
CHEMBL3984183	CHEMBL2147	2	ppb2_NN(ECfp4) + NB(ECfp4)
CHEMBL3984183	CHEMBL4523	3	ppb2_NN(ECfp4) + NB(ECfp4)
CHEMBL3984319	CHEMBL2835	2	ppb2_NN(ECfp4) + NB(ECfp4)
CHEMBL3984720	CHEMBL2835	2	ppb2_NN(ECfp4) + NB(ECfp4)
CHEMBL3984720	CHEMBL2971	3	ppb2_NN(ECfp4) + NB(ECfp4)
CHEMBL3984741	CHEMBL2835	2	ppb2_NN(ECfp4) + NB(ECfp4)
CHEMBL3984764	CHEMBL2148	1	ppb2_NN(ECfp4) + NB(ECfp4)
CHEMBL3984793	CHEMBL2148	1	ppb2_NN(ECfp4) + NB(ECfp4)

## Sheet: NN(ECfp4)
id	ChEMBL-ID	Rank	method
CHEMBL3218576	CHEMBL3130	2	ppb2_NN(ECfp4)
CHEMBL3218576	CHEMBL4005	5	ppb2_NN(ECfp4)
CHEMBL3883491	CHEMBL2326	4	ppb2_NN(ECfp4)
CHEMBL3884217	CHEMBL205	3	ppb2_NN(ECfp4)
CHEMBL3884217	CHEMBL2326	6	ppb2_NN(ECfp4)
CHEMBL3885230	CHEMBL205	4	ppb2_NN(ECfp4)
CHEMBL3889835	CHEMBL2014	1	ppb2_NN(ECfp4)
CHEMBL3889835	CHEMBL233	2	ppb2_NN(ECfp4)
CHEMBL3889936	CHEMBL280	1	ppb2_NN(ECfp4)
CHEMBL3889936	CHEMBL4270	3	ppb2_NN(ECfp4)
CHEMBL3889937	CHEMBL2835	2	ppb2_NN(ECfp4)
CHEMBL3889937	CHEMBL2971	3	ppb2_NN(ECfp4)
CHEMBL3890156	CHEMBL1741195	1	ppb2_NN(ECfp4)
CHEMBL3890156	CHEMBL209	2	ppb2_NN(ECfp4)
CHEMBL3890208	CHEMBL2148	1	ppb2_NN(ECfp4)
CHEMBL3891851	CHEMBL2147	7	ppb2_NN(ECfp4)
CHEMBL3892885	CHEMBL2147	7	ppb2_NN(ECfp4)
CHEMBL3893643	CHEMBL233	4	ppb2_NN(ECfp4)
CHEMBL3893713	CHEMBL2971	7	ppb2_NN(ECfp4)
CHEMBL3896312	CHEMBL5407	4	ppb2_NN(ECfp4)
CHEMBL3896759	CHEMBL2835	2	ppb2_NN(ECfp4)
CHEMBL3896759	CHEMBL2971	3	ppb2_NN(ECfp4)
CHEMBL3896791	CHEMBL1741195	1	ppb2_NN(ECfp4)
CHEMBL3896791	CHEMBL209	2	ppb2_NN(ECfp4)
CHEMBL3896877	CHEMBL237	6	ppb2_NN(ECfp4)
CHEMBL3896937	CHEMBL217	2	ppb2_NN(ECfp4)
CHEMBL3896937	CHEMBL224	3	ppb2_NN(ECfp4)
CHEMBL3896937	CHEMBL234	6	ppb2_NN(ECfp4)
CHEMBL3897068	CHEMBL237	3	ppb2_NN(ECfp4)
CHEMBL3897068	CHEMBL233	6	ppb2_NN(ECfp4)
CHEMBL3897108	CHEMBL1741195	1	ppb2_NN(ECfp4)
CHEMBL3897108	CHEMBL209	2	ppb2_NN(ECfp4)
CHEMBL3897112	CHEMBL2835	2	ppb2_NN(ECfp4)
CHEMBL3897112	CHEMBL2971	3	ppb2_NN(ECfp4)
CHEMBL3897323	CHEMBL2147	1	ppb2_NN(ECfp4)
CHEMBL3897323	CHEMBL4523	2	ppb2_NN(ECfp4)
CHEMBL3897912	CHEMBL2147	7	ppb2_NN(ECfp4)
CHEMBL3897967	CHEMBL233	1	ppb2_NN(ECfp4)
CHEMBL3897967	CHEMBL237	2	ppb2_NN(ECfp4)
CHEMBL3897993	CHEMBL2835	2	ppb2_NN(ECfp4)
CHEMBL3897993	CHEMBL2971	3	ppb2_NN(ECfp4)
CHEMBL3898231	CHEMBL2835	2	ppb2_NN(ECfp4)
CHEMBL3898231	CHEMBL2971	3	ppb2_NN(ECfp4)
CHEMBL3898989	CHEMBL2147	1	ppb2_NN(ECfp4)
CHEMBL3898989	CHEMBL4523	2	ppb2_NN(ECfp4)
CHEMBL3898989	CHEMBL5407	3	ppb2_NN(ECfp4)
CHEMBL3899109	CHEMBL2835	2	ppb2_NN(ECfp4)
CHEMBL3899109	CHEMBL2971	3	ppb2_NN(ECfp4)
CHEMBL3899281	CHEMBL2835	1	ppb2_NN(ECfp4)
CHEMBL3899672	CHEMBL2148	2	ppb2_NN(ECfp4)
CHEMBL3899672	CHEMBL2835	3	ppb2_NN(ECfp4)
CHEMBL3899672	CHEMBL2971	5	ppb2_NN(ECfp4)
CHEMBL3899762	CHEMBL2835	2	ppb2_NN(ECfp4)
CHEMBL3899762	CHEMBL2971	3	ppb2_NN(ECfp4)
CHEMBL3900004	CHEMBL2835	2	ppb2_NN(ECfp4)
CHEMBL3900004	CHEMBL2971	3	ppb2_NN(ECfp4)
CHEMBL3900248	CHEMBL1741195	1	ppb2_NN(ECfp4)
CHEMBL3900248	CHEMBL209	2	ppb2_NN(ECfp4)
CHEMBL3900258	CHEMBL2147	1	ppb2_NN(ECfp4)
CHEMBL3900258	CHEMBL5407	3	ppb2_NN(ECfp4)
CHEMBL3900425	CHEMBL2147	1	ppb2_NN(ECfp4)
CHEMBL3900425	CHEMBL4523	2	ppb2_NN(ECfp4)
CHEMBL3900425	CHEMBL5407	3	ppb2_NN(ECfp4)
CHEMBL3900752	CHEMBL217	3	ppb2_NN(ECfp4)
CHEMBL3900752	CHEMBL224	5	ppb2_NN(ECfp4)
CHEMBL3900795	CHEMBL2147	1	ppb2_NN(ECfp4)
CHEMBL3900795	CHEMBL4523	2	ppb2_NN(ECfp4)
CHEMBL3901124	CHEMBL2148	1	ppb2_NN(ECfp4)
CHEMBL3901124	CHEMBL2835	2	ppb2_NN(ECfp4)
CHEMBL3901124	CHEMBL2971	3	ppb2_NN(ECfp4)
CHEMBL3901134	CHEMBL2835	2	ppb2_NN(ECfp4)
CHEMBL3901134	CHEMBL2971	3	ppb2_NN(ECfp4)
CHEMBL3901481	CHEMBL2147	1	ppb2_NN(ECfp4)
CHEMBL3901481	CHEMBL5407	3	ppb2_NN(ECfp4)
CHEMBL3901497	CHEMBL2835	2	ppb2_NN(ECfp4)
CHEMBL3901497	CHEMBL2971	3	ppb2_NN(ECfp4)
CHEMBL3902417	CHEMBL2147	2	ppb2_NN(ECfp4)
CHEMBL3902417	CHEMBL5407	4	ppb2_NN(ECfp4)
CHEMBL3902542	CHEMBL2148	2	ppb2_NN(ECfp4)
CHEMBL3902542	CHEMBL2971	6	ppb2_NN(ECfp4)
CHEMBL3902579	CHEMBL2835	3	ppb2_NN(ECfp4)
CHEMBL3902579	CHEMBL2971	7	ppb2_NN(ECfp4)
CHEMBL3903218	CHEMBL2835	3	ppb2_NN(ECfp4)
CHEMBL3903218	CHEMBL2971	6	ppb2_NN(ECfp4)
CHEMBL3903272	CHEMBL4625	1	ppb2_NN(ECfp4)
CHEMBL3903272	CHEMBL4860	2	ppb2_NN(ECfp4)
CHEMBL3903274	CHEMBL5145	1	ppb2_NN(ECfp4)
CHEMBL3903286	CHEMBL2148	3	ppb2_NN(ECfp4)
CHEMBL3903286	CHEMBL2971	5	ppb2_NN(ECfp4)
CHEMBL3903560	CHEMBL234	2	ppb2_NN(ECfp4)
CHEMBL3903686	CHEMBL2147	2	ppb2_NN(ECfp4)
CHEMBL3903720	CHEMBL2835	2	ppb2_NN(ECfp4)
CHEMBL3903720	CHEMBL2971	3	ppb2_NN(ECfp4)
CHEMBL3903777	CHEMBL1741195	1	ppb2_NN(ECfp4)
CHEMBL3903777	CHEMBL209	2	ppb2_NN(ECfp4)
CHEMBL3903837	CHEMBL2147	1	ppb2_NN(ECfp4)
CHEMBL3903837	CHEMBL4523	2	ppb2_NN(ECfp4)
CHEMBL3904335	CHEMBL2835	4	ppb2_NN(ECfp4)
CHEMBL3904982	CHEMBL2835	2	ppb2_NN(ECfp4)
CHEMBL3904982	CHEMBL2971	3	ppb2_NN(ECfp4)
CHEMBL3905144	CHEMBL2147	1	ppb2_NN(ECfp4)
CHEMBL3905144	CHEMBL4523	2	ppb2_NN(ECfp4)
CHEMBL3905150	CHEMBL2148	1	ppb2_NN(ECfp4)
CHEMBL3905150	CHEMBL2835	2	ppb2_NN(ECfp4)
CHEMBL3905194	CHEMBL2147	1	ppb2_NN(ECfp4)
CHEMBL3905194	CHEMBL4523	2	ppb2_NN(ECfp4)
CHEMBL3905247	CHEMBL217	1	ppb2_NN(ECfp4)
CHEMBL3905247	CHEMBL234	2	ppb2_NN(ECfp4)
CHEMBL3905788	CHEMBL2835	2	ppb2_NN(ECfp4)
CHEMBL3905788	CHEMBL2971	3	ppb2_NN(ECfp4)
CHEMBL3906087	CHEMBL2835	2	ppb2_NN(ECfp4)
CHEMBL3906087	CHEMBL2971	3	ppb2_NN(ECfp4)
CHEMBL3906168	CHEMBL2835	2	ppb2_NN(ECfp4)
CHEMBL3906168	CHEMBL2971	3	ppb2_NN(ECfp4)
CHEMBL3906421	CHEMBL2147	1	ppb2_NN(ECfp4)
CHEMBL3906421	CHEMBL5407	3	ppb2_NN(ECfp4)
CHEMBL3906798	CHEMBL2147	3	ppb2_NN(ECfp4)
CHEMBL3906798	CHEMBL4523	4	ppb2_NN(ECfp4)
CHEMBL3906798	CHEMBL5407	5	ppb2_NN(ECfp4)
CHEMBL3906885	CHEMBL2148	3	ppb2_NN(ECfp4)
CHEMBL3906885	CHEMBL2971	5	ppb2_NN(ECfp4)
CHEMBL3906961	CHEMBL2835	2	ppb2_NN(ECfp4)
CHEMBL3906961	CHEMBL2971	3	ppb2_NN(ECfp4)
CHEMBL3907010	CHEMBL3105	1	ppb2_NN(ECfp4)
CHEMBL3907010	CHEMBL5366	2	ppb2_NN(ECfp4)
CHEMBL3907320	CHEMBL2147	1	ppb2_NN(ECfp4)
CHEMBL3907320	CHEMBL5407	3	ppb2_NN(ECfp4)
CHEMBL3907536	CHEMBL1741195	1	ppb2_NN(ECfp4)
CHEMBL3907536	CHEMBL209	2	ppb2_NN(ECfp4)
CHEMBL3908233	CHEMBL2835	2	ppb2_NN(ECfp4)
CHEMBL3908233	CHEMBL2971	3	ppb2_NN(ECfp4)
CHEMBL3908328	CHEMBL2835	2	ppb2_NN(ECfp4)
CHEMBL3908328	CHEMBL2971	3	ppb2_NN(ECfp4)
CHEMBL3908409	CHEMBL2835	2	ppb2_NN(ECfp4)
CHEMBL3908409	CHEMBL2971	3	ppb2_NN(ECfp4)
CHEMBL3909091	CHEMBL2835	2	ppb2_NN(ECfp4)
CHEMBL3909091	CHEMBL2971	3	ppb2_NN(ECfp4)
CHEMBL3909092	CHEMBL2835	3	ppb2_NN(ECfp4)
CHEMBL3909092	CHEMBL2971	5	ppb2_NN(ECfp4)
CHEMBL3909280	CHEMBL2147	1	ppb2_NN(ECfp4)
CHEMBL3909280	CHEMBL4523	2	ppb2_NN(ECfp4)
CHEMBL3909280	CHEMBL5407	3	ppb2_NN(ECfp4)
CHEMBL3909510	CHEMBL2835	2	ppb2_NN(ECfp4)
CHEMBL3909510	CHEMBL2971	3	ppb2_NN(ECfp4)
CHEMBL3909519	CHEMBL2835	2	ppb2_NN(ECfp4)
CHEMBL3909519	CHEMBL2971	3	ppb2_NN(ECfp4)
CHEMBL3909568	CHEMBL2835	2	ppb2_NN(ECfp4)
CHEMBL3909568	CHEMBL2971	4	ppb2_NN(ECfp4)
CHEMBL3909947	CHEMBL2147	1	ppb2_NN(ECfp4)
CHEMBL3909947	CHEMBL5407	3	ppb2_NN(ECfp4)
CHEMBL3910228	CHEMBL2525	1	ppb2_NN(ECfp4)
CHEMBL3910228	CHEMBL4822	2	ppb2_NN(ECfp4)
CHEMBL3911037	CHEMBL1945	1	ppb2_NN(ECfp4)
CHEMBL3911037	CHEMBL1946	2	ppb2_NN(ECfp4)
CHEMBL3911166	CHEMBL2835	2	ppb2_NN(ECfp4)
CHEMBL3911166	CHEMBL2971	3	ppb2_NN(ECfp4)
CHEMBL3911942	CHEMBL2835	2	ppb2_NN(ECfp4)
CHEMBL3911942	CHEMBL2971	3	ppb2_NN(ECfp4)
CHEMBL3912892	CHEMBL2835	2	ppb2_NN(ECfp4)
CHEMBL3912892	CHEMBL2971	3	ppb2_NN(ECfp4)
CHEMBL3912919	CHEMBL2835	2	ppb2_NN(ECfp4)
CHEMBL3912919	CHEMBL2971	3	ppb2_NN(ECfp4)
CHEMBL3913446	CHEMBL2147	4	ppb2_NN(ECfp4)
CHEMBL3913446	CHEMBL4523	5	ppb2_NN(ECfp4)
CHEMBL3913540	CHEMBL2147	1	ppb2_NN(ECfp4)
CHEMBL3913540	CHEMBL4523	2	ppb2_NN(ECfp4)
CHEMBL3913691	CHEMBL224	5	ppb2_NN(ECfp4)
CHEMBL3913691	CHEMBL234	8	ppb2_NN(ECfp4)
CHEMBL3913842	CHEMBL2835	2	ppb2_NN(ECfp4)
CHEMBL3913842	CHEMBL2971	3	ppb2_NN(ECfp4)
CHEMBL3914162	CHEMBL2835	2	ppb2_NN(ECfp4)
CHEMBL3914162	CHEMBL2971	3	ppb2_NN(ECfp4)
CHEMBL3914221	CHEMBL2835	2	ppb2_NN(ECfp4)
CHEMBL3914221	CHEMBL2971	3	ppb2_NN(ECfp4)
CHEMBL3914377	CHEMBL2835	2	ppb2_NN(ECfp4)
CHEMBL3914377	CHEMBL2971	3	ppb2_NN(ECfp4)
CHEMBL3914438	CHEMBL2148	5	ppb2_NN(ECfp4)
CHEMBL3914438	CHEMBL2835	7	ppb2_NN(ECfp4)
CHEMBL3914438	CHEMBL2971	10	ppb2_NN(ECfp4)
CHEMBL3914475	CHEMBL2148	1	ppb2_NN(ECfp4)
CHEMBL3914475	CHEMBL2835	2	ppb2_NN(ECfp4)
CHEMBL3914541	CHEMBL2835	2	ppb2_NN(ECfp4)
CHEMBL3914541	CHEMBL2971	3	ppb2_NN(ECfp4)
CHEMBL3914623	CHEMBL2835	2	ppb2_NN(ECfp4)
CHEMBL3914639	CHEMBL2147	8	ppb2_NN(ECfp4)
CHEMBL3914639	CHEMBL4523	9	ppb2_NN(ECfp4)
CHEMBL3914639	CHEMBL5407	10	ppb2_NN(ECfp4)
CHEMBL3915323	CHEMBL5407	5	ppb2_NN(ECfp4)
CHEMBL3917854	CHEMBL2971	7	ppb2_NN(ECfp4)
CHEMBL3917906	CHEMBL2971	10	ppb2_NN(ECfp4)
CHEMBL3918755	CHEMBL217	4	ppb2_NN(ECfp4)
CHEMBL3918755	CHEMBL224	6	ppb2_NN(ECfp4)
CHEMBL3919799	CHEMBL2971	6	ppb2_NN(ECfp4)
CHEMBL3920252	CHEMBL224	6	ppb2_NN(ECfp4)
CHEMBL3920418	CHEMBL2971	10	ppb2_NN(ECfp4)
CHEMBL3920484	CHEMBL2148	6	ppb2_NN(ECfp4)
CHEMBL3920484	CHEMBL2835	7	ppb2_NN(ECfp4)
CHEMBL3920581	CHEMBL2971	8	ppb2_NN(ECfp4)
CHEMBL3921320	CHEMBL2971	5	ppb2_NN(ECfp4)
CHEMBL3923240	CHEMBL214	6	ppb2_NN(ECfp4)
CHEMBL3923240	CHEMBL224	7	ppb2_NN(ECfp4)
CHEMBL3926009	CHEMBL2835	2	ppb2_NN(ECfp4)
CHEMBL3926009	CHEMBL2971	3	ppb2_NN(ECfp4)
CHEMBL3926059	CHEMBL2148	2	ppb2_NN(ECfp4)
CHEMBL3926059	CHEMBL2971	8	ppb2_NN(ECfp4)
CHEMBL3926308	CHEMBL2835	2	ppb2_NN(ECfp4)
CHEMBL3926308	CHEMBL2971	3	ppb2_NN(ECfp4)
CHEMBL3926930	CHEMBL2148	2	ppb2_NN(ECfp4)
CHEMBL3926930	CHEMBL2971	5	ppb2_NN(ECfp4)
CHEMBL3927136	CHEMBL237	1	ppb2_NN(ECfp4)
CHEMBL3927136	CHEMBL233	2	ppb2_NN(ECfp4)
CHEMBL3927952	CHEMBL2147	1	ppb2_NN(ECfp4)
CHEMBL3927952	CHEMBL4523	2	ppb2_NN(ECfp4)
CHEMBL3927952	CHEMBL5407	3	ppb2_NN(ECfp4)
CHEMBL3928129	CHEMBL2835	1	ppb2_NN(ECfp4)
CHEMBL3928249	CHEMBL2835	2	ppb2_NN(ECfp4)
CHEMBL3928249	CHEMBL2971	3	ppb2_NN(ECfp4)
CHEMBL3929011	CHEMBL2147	1	ppb2_NN(ECfp4)
CHEMBL3929011	CHEMBL4523	2	ppb2_NN(ECfp4)
CHEMBL3929011	CHEMBL5407	3	ppb2_NN(ECfp4)
CHEMBL3929168	CHEMBL217	1	ppb2_NN(ECfp4)
CHEMBL3929168	CHEMBL234	2	ppb2_NN(ECfp4)
CHEMBL3929168	CHEMBL224	5	ppb2_NN(ECfp4)
CHEMBL3929264	CHEMBL2147	1	ppb2_NN(ECfp4)
CHEMBL3929264	CHEMBL5407	3	ppb2_NN(ECfp4)
CHEMBL3929534	CHEMBL1741195	1	ppb2_NN(ECfp4)
CHEMBL3929534	CHEMBL209	2	ppb2_NN(ECfp4)
CHEMBL3929573	CHEMBL2835	2	ppb2_NN(ECfp4)
CHEMBL3929573	CHEMBL2971	3	ppb2_NN(ECfp4)
CHEMBL3929734	CHEMBL2835	2	ppb2_NN(ECfp4)
CHEMBL3929734	CHEMBL2971	3	ppb2_NN(ECfp4)
CHEMBL3930290	CHEMBL2148	2	ppb2_NN(ECfp4)
CHEMBL3930290	CHEMBL2971	5	ppb2_NN(ECfp4)
CHEMBL3930305	CHEMBL2835	1	ppb2_NN(ECfp4)
CHEMBL3930305	CHEMBL2971	8	ppb2_NN(ECfp4)
CHEMBL3930515	CHEMBL1908	1	ppb2_NN(ECfp4)
CHEMBL3930515	CHEMBL2722	2	ppb2_NN(ECfp4)
CHEMBL3930620	CHEMBL325	3	ppb2_NN(ECfp4)
CHEMBL3930620	CHEMBL203	7	ppb2_NN(ECfp4)
CHEMBL3930712	CHEMBL2148	1	ppb2_NN(ECfp4)
CHEMBL3930712	CHEMBL2835	2	ppb2_NN(ECfp4)
CHEMBL3931150	CHEMBL2835	4	ppb2_NN(ECfp4)
CHEMBL3931274	CHEMBL2147	1	ppb2_NN(ECfp4)
CHEMBL3931274	CHEMBL5407	3	ppb2_NN(ECfp4)
CHEMBL3931278	CHEMBL2835	2	ppb2_NN(ECfp4)
CHEMBL3931278	CHEMBL2971	3	ppb2_NN(ECfp4)
CHEMBL3931279	CHEMBL2147	1	ppb2_NN(ECfp4)
CHEMBL3931279	CHEMBL5407	3	ppb2_NN(ECfp4)
CHEMBL3931819	CHEMBL2835	2	ppb2_NN(ECfp4)
CHEMBL3931819	CHEMBL2971	3	ppb2_NN(ECfp4)
CHEMBL3932186	CHEMBL224	3	ppb2_NN(ECfp4)
CHEMBL3932460	CHEMBL2147	1	ppb2_NN(ECfp4)
CHEMBL3932460	CHEMBL4523	2	ppb2_NN(ECfp4)
CHEMBL3932623	CHEMBL2835	2	ppb2_NN(ECfp4)
CHEMBL3932623	CHEMBL2971	3	ppb2_NN(ECfp4)
CHEMBL3932881	CHEMBL2835	2	ppb2_NN(ECfp4)
CHEMBL3932881	CHEMBL2971	3	ppb2_NN(ECfp4)
CHEMBL3933766	CHEMBL2835	2	ppb2_NN(ECfp4)
CHEMBL3933766	CHEMBL2971	3	ppb2_NN(ECfp4)
CHEMBL3933868	CHEMBL2147	1	ppb2_NN(ECfp4)
CHEMBL3933868	CHEMBL5407	3	ppb2_NN(ECfp4)
CHEMBL3934335	CHEMBL2835	2	ppb2_NN(ECfp4)
CHEMBL3934335	CHEMBL2971	6	ppb2_NN(ECfp4)
CHEMBL3934383	CHEMBL2147	1	ppb2_NN(ECfp4)
CHEMBL3934383	CHEMBL4523	2	ppb2_NN(ECfp4)
CHEMBL3934383	CHEMBL5407	3	ppb2_NN(ECfp4)
CHEMBL3934709	CHEMBL2835	2	ppb2_NN(ECfp4)
CHEMBL3934709	CHEMBL2971	3	ppb2_NN(ECfp4)
CHEMBL3934942	CHEMBL2148	2	ppb2_NN(ECfp4)
CHEMBL3934963	CHEMBL2835	2	ppb2_NN(ECfp4)
CHEMBL3934963	CHEMBL2971	5	ppb2_NN(ECfp4)
CHEMBL3935018	CHEMBL2147	7	ppb2_NN(ECfp4)
CHEMBL3935018	CHEMBL4523	8	ppb2_NN(ECfp4)
CHEMBL3935018	CHEMBL5407	9	ppb2_NN(ECfp4)
CHEMBL3935096	CHEMBL2147	2	ppb2_NN(ECfp4)
CHEMBL3935096	CHEMBL4523	3	ppb2_NN(ECfp4)
CHEMBL3935096	CHEMBL5407	4	ppb2_NN(ECfp4)
CHEMBL3935178	CHEMBL2835	1	ppb2_NN(ECfp4)
CHEMBL3935396	CHEMBL2835	2	ppb2_NN(ECfp4)
CHEMBL3935396	CHEMBL2971	3	ppb2_NN(ECfp4)
CHEMBL3936320	CHEMBL2147	1	ppb2_NN(ECfp4)
CHEMBL3936320	CHEMBL4523	2	ppb2_NN(ECfp4)
CHEMBL3936541	CHEMBL2835	2	ppb2_NN(ECfp4)
CHEMBL3936541	CHEMBL2971	4	ppb2_NN(ECfp4)
CHEMBL3936992	CHEMBL2147	1	ppb2_NN(ECfp4)
CHEMBL3936992	CHEMBL4523	2	ppb2_NN(ECfp4)
CHEMBL3937034	CHEMBL2147	1	ppb2_NN(ECfp4)
CHEMBL3937034	CHEMBL5407	3	ppb2_NN(ECfp4)
CHEMBL3937195	CHEMBL2835	2	ppb2_NN(ECfp4)
CHEMBL3937195	CHEMBL2971	3	ppb2_NN(ECfp4)
CHEMBL3937204	CHEMBL2148	2	ppb2_NN(ECfp4)
CHEMBL3937204	CHEMBL2971	5	ppb2_NN(ECfp4)
CHEMBL3937222	CHEMBL1741195	1	ppb2_NN(ECfp4)
CHEMBL3937222	CHEMBL209	2	ppb2_NN(ECfp4)
CHEMBL3937835	CHEMBL2148	2	ppb2_NN(ECfp4)
CHEMBL3937835	CHEMBL2835	3	ppb2_NN(ECfp4)
CHEMBL3937835	CHEMBL2971	5	ppb2_NN(ECfp4)
CHEMBL3937878	CHEMBL2835	2	ppb2_NN(ECfp4)
CHEMBL3937878	CHEMBL2971	3	ppb2_NN(ECfp4)
CHEMBL3937898	CHEMBL2835	2	ppb2_NN(ECfp4)
CHEMBL3937898	CHEMBL2971	3	ppb2_NN(ECfp4)
CHEMBL3937927	CHEMBL2835	2	ppb2_NN(ECfp4)
CHEMBL3937927	CHEMBL2971	4	ppb2_NN(ECfp4)
CHEMBL3938031	CHEMBL2835	1	ppb2_NN(ECfp4)
CHEMBL3938210	CHEMBL217	1	ppb2_NN(ECfp4)
CHEMBL3938210	CHEMBL234	2	ppb2_NN(ECfp4)
CHEMBL3938210	CHEMBL214	6	ppb2_NN(ECfp4)
CHEMBL3938210	CHEMBL224	7	ppb2_NN(ECfp4)
CHEMBL3938660	CHEMBL2835	2	ppb2_NN(ECfp4)
CHEMBL3938660	CHEMBL2971	4	ppb2_NN(ECfp4)
CHEMBL3938720	CHEMBL2835	2	ppb2_NN(ECfp4)
CHEMBL3938720	CHEMBL2971	3	ppb2_NN(ECfp4)
CHEMBL3939101	CHEMBL2147	1	ppb2_NN(ECfp4)
CHEMBL3939101	CHEMBL5407	3	ppb2_NN(ECfp4)
CHEMBL3939394	CHEMBL2147	1	ppb2_NN(ECfp4)
CHEMBL3939394	CHEMBL5407	3	ppb2_NN(ECfp4)
CHEMBL3939580	CHEMBL2148	1	ppb2_NN(ECfp4)
CHEMBL3939580	CHEMBL2835	2	ppb2_NN(ECfp4)
CHEMBL3939892	CHEMBL2835	2	ppb2_NN(ECfp4)
CHEMBL3939892	CHEMBL2971	3	ppb2_NN(ECfp4)
CHEMBL3940227	CHEMBL2147	1	ppb2_NN(ECfp4)
CHEMBL3940227	CHEMBL5407	3	ppb2_NN(ECfp4)
CHEMBL3940389	CHEMBL2147	4	ppb2_NN(ECfp4)
CHEMBL3940389	CHEMBL4523	5	ppb2_NN(ECfp4)
CHEMBL3940712	CHEMBL224	7	ppb2_NN(ECfp4)
CHEMBL3940712	CHEMBL234	10	ppb2_NN(ECfp4)
CHEMBL3940744	CHEMBL2147	7	ppb2_NN(ECfp4)
CHEMBL3940744	CHEMBL4523	8	ppb2_NN(ECfp4)
CHEMBL3940744	CHEMBL5407	9	ppb2_NN(ECfp4)
CHEMBL3940929	CHEMBL2835	2	ppb2_NN(ECfp4)
CHEMBL3940929	CHEMBL2971	3	ppb2_NN(ECfp4)
CHEMBL3941202	CHEMBL2835	1	ppb2_NN(ECfp4)
CHEMBL3941211	CHEMBL2148	3	ppb2_NN(ECfp4)
CHEMBL3941211	CHEMBL2971	8	ppb2_NN(ECfp4)
CHEMBL3942104	CHEMBL2147	1	ppb2_NN(ECfp4)
CHEMBL3942104	CHEMBL5407	3	ppb2_NN(ECfp4)
CHEMBL3942446	CHEMBL2147	1	ppb2_NN(ECfp4)
CHEMBL3942446	CHEMBL5407	3	ppb2_NN(ECfp4)
CHEMBL3942542	CHEMBL2835	2	ppb2_NN(ECfp4)
CHEMBL3942542	CHEMBL2971	5	ppb2_NN(ECfp4)
CHEMBL3942619	CHEMBL262	4	ppb2_NN(ECfp4)
CHEMBL3942721	CHEMBL5145	2	ppb2_NN(ECfp4)
CHEMBL3943096	CHEMBL1741195	1	ppb2_NN(ECfp4)
CHEMBL3943096	CHEMBL209	2	ppb2_NN(ECfp4)
CHEMBL3943572	CHEMBL2835	4	ppb2_NN(ECfp4)
CHEMBL3943572	CHEMBL2971	5	ppb2_NN(ECfp4)
CHEMBL3943705	CHEMBL2147	1	ppb2_NN(ECfp4)
CHEMBL3943705	CHEMBL4523	2	ppb2_NN(ECfp4)
CHEMBL3943705	CHEMBL5407	3	ppb2_NN(ECfp4)
CHEMBL3943759	CHEMBL2147	1	ppb2_NN(ECfp4)
CHEMBL3943759	CHEMBL5407	3	ppb2_NN(ECfp4)
CHEMBL3944062	CHEMBL2147	1	ppb2_NN(ECfp4)
CHEMBL3944062	CHEMBL4523	2	ppb2_NN(ECfp4)
CHEMBL3944062	CHEMBL5407	3	ppb2_NN(ECfp4)
CHEMBL3945832	CHEMBL2973	2	ppb2_NN(ECfp4)
CHEMBL3945832	CHEMBL3231	3	ppb2_NN(ECfp4)
CHEMBL3945908	CHEMBL2835	4	ppb2_NN(ECfp4)
CHEMBL3946306	CHEMBL2147	1	ppb2_NN(ECfp4)
CHEMBL3946306	CHEMBL5407	3	ppb2_NN(ECfp4)
CHEMBL3946970	CHEMBL2147	1	ppb2_NN(ECfp4)
CHEMBL3946970	CHEMBL4523	2	ppb2_NN(ECfp4)
CHEMBL3946970	CHEMBL5407	3	ppb2_NN(ECfp4)
CHEMBL3946995	CHEMBL234	2	ppb2_NN(ECfp4)
CHEMBL3946995	CHEMBL224	4	ppb2_NN(ECfp4)
CHEMBL3947213	CHEMBL2147	6	ppb2_NN(ECfp4)
CHEMBL3947292	CHEMBL2835	1	ppb2_NN(ECfp4)
CHEMBL3947309	CHEMBL2147	1	ppb2_NN(ECfp4)
CHEMBL3947309	CHEMBL5407	3	ppb2_NN(ECfp4)
CHEMBL3947456	CHEMBL2835	2	ppb2_NN(ECfp4)
CHEMBL3947456	CHEMBL2971	3	ppb2_NN(ECfp4)
CHEMBL3947484	CHEMBL2147	1	ppb2_NN(ECfp4)
CHEMBL3947484	CHEMBL5407	3	ppb2_NN(ECfp4)
CHEMBL3947540	CHEMBL2835	1	ppb2_NN(ECfp4)
CHEMBL3947770	CHEMBL2147	1	ppb2_NN(ECfp4)
CHEMBL3947770	CHEMBL5407	3	ppb2_NN(ECfp4)
CHEMBL3947977	CHEMBL2835	2	ppb2_NN(ECfp4)
CHEMBL3947977	CHEMBL2971	3	ppb2_NN(ECfp4)
CHEMBL3948039	CHEMBL2835	2	ppb2_NN(ECfp4)
CHEMBL3948039	CHEMBL2971	3	ppb2_NN(ECfp4)
CHEMBL3948056	CHEMBL217	1	ppb2_NN(ECfp4)
CHEMBL3948056	CHEMBL224	2	ppb2_NN(ECfp4)
CHEMBL3948056	CHEMBL234	5	ppb2_NN(ECfp4)
CHEMBL3948591	CHEMBL2835	2	ppb2_NN(ECfp4)
CHEMBL3948591	CHEMBL2971	3	ppb2_NN(ECfp4)
CHEMBL3948713	CHEMBL233	1	ppb2_NN(ECfp4)
CHEMBL3948713	CHEMBL237	3	ppb2_NN(ECfp4)
CHEMBL3949136	CHEMBL2973	1	ppb2_NN(ECfp4)
CHEMBL3949136	CHEMBL3231	2	ppb2_NN(ECfp4)
CHEMBL3949274	CHEMBL2147	1	ppb2_NN(ECfp4)
CHEMBL3949274	CHEMBL4523	2	ppb2_NN(ECfp4)
CHEMBL3949274	CHEMBL5407	3	ppb2_NN(ECfp4)
CHEMBL3949310	CHEMBL2835	1	ppb2_NN(ECfp4)
CHEMBL3949394	CHEMBL2835	2	ppb2_NN(ECfp4)
CHEMBL3949394	CHEMBL2971	7	ppb2_NN(ECfp4)
CHEMBL3950143	CHEMBL2835	2	ppb2_NN(ECfp4)
CHEMBL3950143	CHEMBL2971	6	ppb2_NN(ECfp4)
CHEMBL3950269	CHEMBL2147	1	ppb2_NN(ECfp4)
CHEMBL3950269	CHEMBL5407	3	ppb2_NN(ECfp4)
CHEMBL3950981	CHEMBL2835	2	ppb2_NN(ECfp4)
CHEMBL3950981	CHEMBL2971	3	ppb2_NN(ECfp4)
CHEMBL3951001	CHEMBL1741195	1	ppb2_NN(ECfp4)
CHEMBL3951001	CHEMBL209	2	ppb2_NN(ECfp4)
CHEMBL3951088	CHEMBL2147	1	ppb2_NN(ECfp4)
CHEMBL3951088	CHEMBL5407	3	ppb2_NN(ECfp4)
CHEMBL3951178	CHEMBL2835	4	ppb2_NN(ECfp4)
CHEMBL3951178	CHEMBL2971	10	ppb2_NN(ECfp4)
CHEMBL3951198	CHEMBL1741195	1	ppb2_NN(ECfp4)
CHEMBL3951198	CHEMBL209	2	ppb2_NN(ECfp4)
CHEMBL3951741	CHEMBL2147	1	ppb2_NN(ECfp4)
CHEMBL3951741	CHEMBL5407	3	ppb2_NN(ECfp4)
CHEMBL3951874	CHEMBL2835	2	ppb2_NN(ECfp4)
CHEMBL3951874	CHEMBL2971	3	ppb2_NN(ECfp4)
CHEMBL3951947	CHEMBL2835	2	ppb2_NN(ECfp4)
CHEMBL3951947	CHEMBL2971	3	ppb2_NN(ECfp4)
CHEMBL3952022	CHEMBL2835	2	ppb2_NN(ECfp4)
CHEMBL3952022	CHEMBL2971	3	ppb2_NN(ECfp4)
CHEMBL3952029	CHEMBL2835	2	ppb2_NN(ECfp4)
CHEMBL3952029	CHEMBL2971	3	ppb2_NN(ECfp4)
CHEMBL3952360	CHEMBL2147	1	ppb2_NN(ECfp4)
CHEMBL3952360	CHEMBL5407	3	ppb2_NN(ECfp4)
CHEMBL3952555	CHEMBL2148	2	ppb2_NN(ECfp4)
CHEMBL3952555	CHEMBL2971	8	ppb2_NN(ECfp4)
CHEMBL3952845	CHEMBL2147	1	ppb2_NN(ECfp4)
CHEMBL3952845	CHEMBL5407	3	ppb2_NN(ECfp4)
CHEMBL3953164	CHEMBL2147	1	ppb2_NN(ECfp4)
CHEMBL3953164	CHEMBL4523	2	ppb2_NN(ECfp4)
CHEMBL3953164	CHEMBL5407	3	ppb2_NN(ECfp4)
CHEMBL3953482	CHEMBL2147	1	ppb2_NN(ECfp4)
CHEMBL3953482	CHEMBL5407	3	ppb2_NN(ECfp4)
CHEMBL3953947	CHEMBL2835	2	ppb2_NN(ECfp4)
CHEMBL3953947	CHEMBL2971	3	ppb2_NN(ECfp4)
CHEMBL3954558	CHEMBL2148	2	ppb2_NN(ECfp4)
CHEMBL3954558	CHEMBL2971	4	ppb2_NN(ECfp4)
CHEMBL3954782	CHEMBL233	1	ppb2_NN(ECfp4)
CHEMBL3954782	CHEMBL236	2	ppb2_NN(ECfp4)
CHEMBL3954782	CHEMBL237	3	ppb2_NN(ECfp4)
CHEMBL3955604	CHEMBL2147	1	ppb2_NN(ECfp4)
CHEMBL3955604	CHEMBL5407	3	ppb2_NN(ECfp4)
CHEMBL3955757	CHEMBL2148	2	ppb2_NN(ECfp4)
CHEMBL3956075	CHEMBL2835	2	ppb2_NN(ECfp4)
CHEMBL3956075	CHEMBL2971	3	ppb2_NN(ECfp4)
CHEMBL3956152	CHEMBL2835	2	ppb2_NN(ECfp4)
CHEMBL3956152	CHEMBL2971	3	ppb2_NN(ECfp4)
CHEMBL3956155	CHEMBL2147	1	ppb2_NN(ECfp4)
CHEMBL3956155	CHEMBL5407	3	ppb2_NN(ECfp4)
CHEMBL3956440	CHEMBL2147	1	ppb2_NN(ECfp4)
CHEMBL3956440	CHEMBL5407	3	ppb2_NN(ECfp4)
CHEMBL3956529	CHEMBL2835	3	ppb2_NN(ECfp4)
CHEMBL3956529	CHEMBL2971	4	ppb2_NN(ECfp4)
CHEMBL3956628	CHEMBL2835	2	ppb2_NN(ECfp4)
CHEMBL3956628	CHEMBL2971	3	ppb2_NN(ECfp4)
CHEMBL3956651	CHEMBL2835	2	ppb2_NN(ECfp4)
CHEMBL3956651	CHEMBL2971	3	ppb2_NN(ECfp4)
CHEMBL3956717	CHEMBL2147	1	ppb2_NN(ECfp4)
CHEMBL3956717	CHEMBL5407	3	ppb2_NN(ECfp4)
CHEMBL3956720	CHEMBL217	1	ppb2_NN(ECfp4)
CHEMBL3956720	CHEMBL234	2	ppb2_NN(ECfp4)
CHEMBL3956720	CHEMBL214	4	ppb2_NN(ECfp4)
CHEMBL3956720	CHEMBL224	5	ppb2_NN(ECfp4)
CHEMBL3956882	CHEMBL2148	2	ppb2_NN(ECfp4)
CHEMBL3956882	CHEMBL2971	4	ppb2_NN(ECfp4)
CHEMBL3957073	CHEMBL2147	9	ppb2_NN(ECfp4)
CHEMBL3957073	CHEMBL4523	10	ppb2_NN(ECfp4)
CHEMBL3957106	CHEMBL1741195	1	ppb2_NN(ECfp4)
CHEMBL3957106	CHEMBL209	2	ppb2_NN(ECfp4)
CHEMBL3957132	CHEMBL2835	2	ppb2_NN(ECfp4)
CHEMBL3957132	CHEMBL2971	3	ppb2_NN(ECfp4)
CHEMBL3957195	CHEMBL2835	2	ppb2_NN(ECfp4)
CHEMBL3957195	CHEMBL2971	3	ppb2_NN(ECfp4)
CHEMBL3957231	CHEMBL2835	2	ppb2_NN(ECfp4)
CHEMBL3957231	CHEMBL2971	3	ppb2_NN(ECfp4)
CHEMBL3957997	CHEMBL2147	1	ppb2_NN(ECfp4)
CHEMBL3957997	CHEMBL5407	3	ppb2_NN(ECfp4)
CHEMBL3958253	CHEMBL2147	2	ppb2_NN(ECfp4)
CHEMBL3958253	CHEMBL5407	4	ppb2_NN(ECfp4)
CHEMBL3958307	CHEMBL2147	5	ppb2_NN(ECfp4)
CHEMBL3958691	CHEMBL2835	2	ppb2_NN(ECfp4)
CHEMBL3958691	CHEMBL2971	3	ppb2_NN(ECfp4)
CHEMBL3958785	CHEMBL2147	1	ppb2_NN(ECfp4)
CHEMBL3958785	CHEMBL5407	3	ppb2_NN(ECfp4)
CHEMBL3958969	CHEMBL280	1	ppb2_NN(ECfp4)
CHEMBL3958969	CHEMBL333	2	ppb2_NN(ECfp4)
CHEMBL3959005	CHEMBL2835	1	ppb2_NN(ECfp4)
CHEMBL3959091	CHEMBL2147	2	ppb2_NN(ECfp4)
CHEMBL3959091	CHEMBL4523	3	ppb2_NN(ECfp4)
CHEMBL3959091	CHEMBL5407	4	ppb2_NN(ECfp4)
CHEMBL3959266	CHEMBL2835	2	ppb2_NN(ECfp4)
CHEMBL3959266	CHEMBL2971	3	ppb2_NN(ECfp4)
CHEMBL3959358	CHEMBL2971	8	ppb2_NN(ECfp4)
CHEMBL3959398	CHEMBL233	2	ppb2_NN(ECfp4)
CHEMBL3959433	CHEMBL2835	1	ppb2_NN(ECfp4)
CHEMBL3959581	CHEMBL5145	1	ppb2_NN(ECfp4)
CHEMBL3959770	CHEMBL2835	3	ppb2_NN(ECfp4)
CHEMBL3959770	CHEMBL2971	10	ppb2_NN(ECfp4)
CHEMBL3959909	CHEMBL2835	4	ppb2_NN(ECfp4)
CHEMBL3959909	CHEMBL2971	5	ppb2_NN(ECfp4)
CHEMBL3959924	CHEMBL2835	2	ppb2_NN(ECfp4)
CHEMBL3959924	CHEMBL2971	3	ppb2_NN(ECfp4)
CHEMBL3960213	CHEMBL2148	1	ppb2_NN(ECfp4)
CHEMBL3960213	CHEMBL2971	3	ppb2_NN(ECfp4)
CHEMBL3960416	CHEMBL2148	2	ppb2_NN(ECfp4)
CHEMBL3960554	CHEMBL2147	1	ppb2_NN(ECfp4)
CHEMBL3960554	CHEMBL4523	2	ppb2_NN(ECfp4)
CHEMBL3960554	CHEMBL5407	3	ppb2_NN(ECfp4)
CHEMBL3960785	CHEMBL217	4	ppb2_NN(ECfp4)
CHEMBL3960785	CHEMBL224	5	ppb2_NN(ECfp4)
CHEMBL3961393	CHEMBL2835	2	ppb2_NN(ECfp4)
CHEMBL3961393	CHEMBL2971	3	ppb2_NN(ECfp4)
CHEMBL3961525	CHEMBL2147	1	ppb2_NN(ECfp4)
CHEMBL3961525	CHEMBL5407	3	ppb2_NN(ECfp4)
CHEMBL3961670	CHEMBL2835	3	ppb2_NN(ECfp4)
CHEMBL3961692	CHEMBL2147	2	ppb2_NN(ECfp4)
CHEMBL3961692	CHEMBL4523	3	ppb2_NN(ECfp4)
CHEMBL3961850	CHEMBL2148	2	ppb2_NN(ECfp4)
CHEMBL3962342	CHEMBL2835	2	ppb2_NN(ECfp4)
CHEMBL3962342	CHEMBL2971	3	ppb2_NN(ECfp4)
CHEMBL3962386	CHEMBL2835	1	ppb2_NN(ECfp4)
CHEMBL3962386	CHEMBL2971	3	ppb2_NN(ECfp4)
CHEMBL3962448	CHEMBL2148	2	ppb2_NN(ECfp4)
CHEMBL3962506	CHEMBL2835	1	ppb2_NN(ECfp4)
CHEMBL3962525	CHEMBL224	2	ppb2_NN(ECfp4)
CHEMBL3963191	CHEMBL2835	2	ppb2_NN(ECfp4)
CHEMBL3963191	CHEMBL2971	3	ppb2_NN(ECfp4)
CHEMBL3963271	CHEMBL2835	2	ppb2_NN(ECfp4)
CHEMBL3963271	CHEMBL2971	3	ppb2_NN(ECfp4)
CHEMBL3963779	CHEMBL2835	2	ppb2_NN(ECfp4)
CHEMBL3963946	CHEMBL2147	1	ppb2_NN(ECfp4)
CHEMBL3963946	CHEMBL5407	3	ppb2_NN(ECfp4)
CHEMBL3964279	CHEMBL2835	2	ppb2_NN(ECfp4)
CHEMBL3964598	CHEMBL233	1	ppb2_NN(ECfp4)
CHEMBL3964598	CHEMBL237	2	ppb2_NN(ECfp4)
CHEMBL3964801	CHEMBL2835	2	ppb2_NN(ECfp4)
CHEMBL3964801	CHEMBL2971	3	ppb2_NN(ECfp4)
CHEMBL3964990	CHEMBL2835	2	ppb2_NN(ECfp4)
CHEMBL3964990	CHEMBL2971	3	ppb2_NN(ECfp4)
CHEMBL3965069	CHEMBL1741195	1	ppb2_NN(ECfp4)
CHEMBL3965069	CHEMBL209	2	ppb2_NN(ECfp4)
CHEMBL3965297	CHEMBL2147	1	ppb2_NN(ECfp4)
CHEMBL3965297	CHEMBL4523	2	ppb2_NN(ECfp4)
CHEMBL3965448	CHEMBL2835	3	ppb2_NN(ECfp4)
CHEMBL3965713	CHEMBL2835	1	ppb2_NN(ECfp4)
CHEMBL3965741	CHEMBL2147	1	ppb2_NN(ECfp4)
CHEMBL3965741	CHEMBL5407	3	ppb2_NN(ECfp4)
CHEMBL3965757	CHEMBL2147	1	ppb2_NN(ECfp4)
CHEMBL3965757	CHEMBL4523	2	ppb2_NN(ECfp4)
CHEMBL3965809	CHEMBL2835	2	ppb2_NN(ECfp4)
CHEMBL3965809	CHEMBL2971	3	ppb2_NN(ECfp4)
CHEMBL3965946	CHEMBL2147	1	ppb2_NN(ECfp4)
CHEMBL3965946	CHEMBL4523	2	ppb2_NN(ECfp4)
CHEMBL3966696	CHEMBL2147	1	ppb2_NN(ECfp4)
CHEMBL3966696	CHEMBL5407	3	ppb2_NN(ECfp4)
CHEMBL3966732	CHEMBL2147	1	ppb2_NN(ECfp4)
CHEMBL3966732	CHEMBL4523	2	ppb2_NN(ECfp4)
CHEMBL3966830	CHEMBL233	1	ppb2_NN(ECfp4)
CHEMBL3966830	CHEMBL237	2	ppb2_NN(ECfp4)
CHEMBL3966842	CHEMBL217	1	ppb2_NN(ECfp4)
CHEMBL3966842	CHEMBL224	2	ppb2_NN(ECfp4)
CHEMBL3967830	CHEMBL2835	2	ppb2_NN(ECfp4)
CHEMBL3967830	CHEMBL2971	3	ppb2_NN(ECfp4)
CHEMBL3967893	CHEMBL5145	9	ppb2_NN(ECfp4)
CHEMBL3968206	CHEMBL2147	1	ppb2_NN(ECfp4)
CHEMBL3968206	CHEMBL5407	3	ppb2_NN(ECfp4)
CHEMBL3968315	CHEMBL2835	2	ppb2_NN(ECfp4)
CHEMBL3968315	CHEMBL2971	3	ppb2_NN(ECfp4)
CHEMBL3968781	CHEMBL2835	2	ppb2_NN(ECfp4)
CHEMBL3968781	CHEMBL2971	3	ppb2_NN(ECfp4)
CHEMBL3968925	CHEMBL4005	2	ppb2_NN(ECfp4)
CHEMBL3968925	CHEMBL3267	3	ppb2_NN(ECfp4)
CHEMBL3969155	CHEMBL233	1	ppb2_NN(ECfp4)
CHEMBL3969155	CHEMBL237	3	ppb2_NN(ECfp4)
CHEMBL3969253	CHEMBL2835	2	ppb2_NN(ECfp4)
CHEMBL3970360	CHEMBL2835	2	ppb2_NN(ECfp4)
CHEMBL3970360	CHEMBL2971	3	ppb2_NN(ECfp4)
CHEMBL3970779	CHEMBL2835	2	ppb2_NN(ECfp4)
CHEMBL3970779	CHEMBL2971	3	ppb2_NN(ECfp4)
CHEMBL3970953	CHEMBL2147	1	ppb2_NN(ECfp4)
CHEMBL3970953	CHEMBL4523	2	ppb2_NN(ECfp4)
CHEMBL3970953	CHEMBL5407	3	ppb2_NN(ECfp4)
CHEMBL3970981	CHEMBL2147	1	ppb2_NN(ECfp4)
CHEMBL3970981	CHEMBL5407	3	ppb2_NN(ECfp4)
CHEMBL3970998	CHEMBL2835	2	ppb2_NN(ECfp4)
CHEMBL3971083	CHEMBL2835	2	ppb2_NN(ECfp4)
CHEMBL3971083	CHEMBL2971	3	ppb2_NN(ECfp4)
CHEMBL3971538	CHEMBL1945	1	ppb2_NN(ECfp4)
CHEMBL3971672	CHEMBL2835	2	ppb2_NN(ECfp4)
CHEMBL3971672	CHEMBL2971	3	ppb2_NN(ECfp4)
CHEMBL3971907	CHEMBL234	8	ppb2_NN(ECfp4)
CHEMBL3972050	CHEMBL2147	1	ppb2_NN(ECfp4)
CHEMBL3972050	CHEMBL5407	3	ppb2_NN(ECfp4)
CHEMBL3972612	CHEMBL2835	2	ppb2_NN(ECfp4)
CHEMBL3972612	CHEMBL2971	3	ppb2_NN(ECfp4)
CHEMBL3972830	CHEMBL2835	2	ppb2_NN(ECfp4)
CHEMBL3972830	CHEMBL2971	3	ppb2_NN(ECfp4)
CHEMBL3973487	CHEMBL234	2	ppb2_NN(ECfp4)
CHEMBL3973544	CHEMBL2147	2	ppb2_NN(ECfp4)
CHEMBL3973547	CHEMBL2835	2	ppb2_NN(ECfp4)
CHEMBL3973547	CHEMBL2971	3	ppb2_NN(ECfp4)
CHEMBL3973848	CHEMBL2148	3	ppb2_NN(ECfp4)
CHEMBL3974857	CHEMBL233	2	ppb2_NN(ECfp4)
CHEMBL3974857	CHEMBL237	3	ppb2_NN(ECfp4)
CHEMBL3975046	CHEMBL2835	1	ppb2_NN(ECfp4)
CHEMBL3975198	CHEMBL2147	1	ppb2_NN(ECfp4)
CHEMBL3975198	CHEMBL5407	3	ppb2_NN(ECfp4)
CHEMBL3975506	CHEMBL2835	2	ppb2_NN(ECfp4)
CHEMBL3975506	CHEMBL2971	3	ppb2_NN(ECfp4)
CHEMBL3975756	CHEMBL2147	1	ppb2_NN(ECfp4)
CHEMBL3975756	CHEMBL5407	3	ppb2_NN(ECfp4)
CHEMBL3975764	CHEMBL2147	1	ppb2_NN(ECfp4)
CHEMBL3975764	CHEMBL5407	3	ppb2_NN(ECfp4)
CHEMBL3975787	CHEMBL2147	1	ppb2_NN(ECfp4)
CHEMBL3975787	CHEMBL5407	3	ppb2_NN(ECfp4)
CHEMBL3976267	CHEMBL2147	1	ppb2_NN(ECfp4)
CHEMBL3976267	CHEMBL4523	2	ppb2_NN(ECfp4)
CHEMBL3976267	CHEMBL5407	3	ppb2_NN(ECfp4)
CHEMBL3976282	CHEMBL217	1	ppb2_NN(ECfp4)
CHEMBL3976282	CHEMBL234	2	ppb2_NN(ECfp4)
CHEMBL3976282	CHEMBL224	7	ppb2_NN(ECfp4)
CHEMBL3976307	CHEMBL2835	2	ppb2_NN(ECfp4)
CHEMBL3976307	CHEMBL2971	3	ppb2_NN(ECfp4)
CHEMBL3976610	CHEMBL2835	2	ppb2_NN(ECfp4)
CHEMBL3977158	CHEMBL3629	1	ppb2_NN(ECfp4)
CHEMBL3977237	CHEMBL2835	2	ppb2_NN(ECfp4)
CHEMBL3977237	CHEMBL2971	3	ppb2_NN(ECfp4)
CHEMBL3977452	CHEMBL2148	2	ppb2_NN(ECfp4)
CHEMBL3977452	CHEMBL2971	9	ppb2_NN(ECfp4)
CHEMBL3977509	CHEMBL2148	2	ppb2_NN(ECfp4)
CHEMBL3979537	CHEMBL2835	2	ppb2_NN(ECfp4)
CHEMBL3979537	CHEMBL2971	3	ppb2_NN(ECfp4)
CHEMBL3980040	CHEMBL2147	1	ppb2_NN(ECfp4)
CHEMBL3980040	CHEMBL5407	3	ppb2_NN(ECfp4)
CHEMBL3980778	CHEMBL2148	1	ppb2_NN(ECfp4)
CHEMBL3980778	CHEMBL2835	2	ppb2_NN(ECfp4)
CHEMBL3980864	CHEMBL233	1	ppb2_NN(ECfp4)
CHEMBL3980864	CHEMBL237	2	ppb2_NN(ECfp4)
CHEMBL3980959	CHEMBL2835	2	ppb2_NN(ECfp4)
CHEMBL3981057	CHEMBL1945	1	ppb2_NN(ECfp4)
CHEMBL3981057	CHEMBL1946	2	ppb2_NN(ECfp4)
CHEMBL3981144	CHEMBL2835	2	ppb2_NN(ECfp4)
CHEMBL3981144	CHEMBL2971	3	ppb2_NN(ECfp4)
CHEMBL3981187	CHEMBL2835	2	ppb2_NN(ECfp4)
CHEMBL3981187	CHEMBL2971	3	ppb2_NN(ECfp4)
CHEMBL3982255	CHEMBL2148	3	ppb2_NN(ECfp4)
CHEMBL3982255	CHEMBL2971	7	ppb2_NN(ECfp4)
CHEMBL3982307	CHEMBL2148	2	ppb2_NN(ECfp4)
CHEMBL3982408	CHEMBL2835	2	ppb2_NN(ECfp4)
CHEMBL3982408	CHEMBL2971	3	ppb2_NN(ECfp4)
CHEMBL3982418	CHEMBL1908	1	ppb2_NN(ECfp4)
CHEMBL3982418	CHEMBL2722	3	ppb2_NN(ECfp4)
CHEMBL3982486	CHEMBL217	3	ppb2_NN(ECfp4)
CHEMBL3982486	CHEMBL214	6	ppb2_NN(ECfp4)
CHEMBL3982486	CHEMBL224	7	ppb2_NN(ECfp4)
CHEMBL3982497	CHEMBL3920	7	ppb2_NN(ECfp4)
CHEMBL3982539	CHEMBL2147	1	ppb2_NN(ECfp4)
CHEMBL3982539	CHEMBL4523	2	ppb2_NN(ECfp4)
CHEMBL3982539	CHEMBL5407	3	ppb2_NN(ECfp4)
CHEMBL3983009	CHEMBL3920	2	ppb2_NN(ECfp4)
CHEMBL3983040	CHEMBL2835	2	ppb2_NN(ECfp4)
CHEMBL3983256	CHEMBL2835	2	ppb2_NN(ECfp4)
CHEMBL3983256	CHEMBL2971	3	ppb2_NN(ECfp4)
CHEMBL3983351	CHEMBL2147	1	ppb2_NN(ECfp4)
CHEMBL3983351	CHEMBL5407	3	ppb2_NN(ECfp4)
CHEMBL3983983	CHEMBL2835	2	ppb2_NN(ECfp4)
CHEMBL3983983	CHEMBL2971	3	ppb2_NN(ECfp4)
CHEMBL3984183	CHEMBL2147	1	ppb2_NN(ECfp4)
CHEMBL3984183	CHEMBL4523	2	ppb2_NN(ECfp4)
CHEMBL3984183	CHEMBL5407	3	ppb2_NN(ECfp4)
CHEMBL3984282	CHEMBL5145	1	ppb2_NN(ECfp4)
CHEMBL3984319	CHEMBL2835	2	ppb2_NN(ECfp4)
CHEMBL3984319	CHEMBL2971	3	ppb2_NN(ECfp4)
CHEMBL3984720	CHEMBL2835	2	ppb2_NN(ECfp4)
CHEMBL3984720	CHEMBL2971	3	ppb2_NN(ECfp4)
CHEMBL3984741	CHEMBL2835	2	ppb2_NN(ECfp4)
CHEMBL3984741	CHEMBL2971	3	ppb2_NN(ECfp4)
CHEMBL3984764	CHEMBL2148	2	ppb2_NN(ECfp4)
CHEMBL3984793	CHEMBL2148	2	ppb2_NN(ECfp4)

## Sheet: NN(MQN)+ NB(ECfp4)
id	ChEMBL-ID	Rank	method
CHEMBL3884217	CHEMBL205	2	ppb2_NN(MQN) + NB(ECfp4)
CHEMBL3885230	CHEMBL205	3	ppb2_NN(MQN) + NB(ECfp4)
CHEMBL3889835	CHEMBL233	1	ppb2_NN(MQN) + NB(ECfp4)
CHEMBL3889835	CHEMBL2014	7	ppb2_NN(MQN) + NB(ECfp4)
CHEMBL3889936	CHEMBL280	2	ppb2_NN(MQN) + NB(ECfp4)
CHEMBL3890156	CHEMBL209	1	ppb2_NN(MQN) + NB(ECfp4)
CHEMBL3890156	CHEMBL1741195	2	ppb2_NN(MQN) + NB(ECfp4)
CHEMBL3890208	CHEMBL2148	8	ppb2_NN(MQN) + NB(ECfp4)
CHEMBL3890530	CHEMBL2147	2	ppb2_NN(MQN) + NB(ECfp4)
CHEMBL3890530	CHEMBL4523	3	ppb2_NN(MQN) + NB(ECfp4)
CHEMBL3890745	CHEMBL5407	1	ppb2_NN(MQN) + NB(ECfp4)
CHEMBL3890745	CHEMBL2147	3	ppb2_NN(MQN) + NB(ECfp4)
CHEMBL3890953	CHEMBL5407	1	ppb2_NN(MQN) + NB(ECfp4)
CHEMBL3890953	CHEMBL2147	3	ppb2_NN(MQN) + NB(ECfp4)
CHEMBL3890962	CHEMBL3629	1	ppb2_NN(MQN) + NB(ECfp4)
CHEMBL3891057	CHEMBL2835	2	ppb2_NN(MQN) + NB(ECfp4)
CHEMBL3891137	CHEMBL2835	2	ppb2_NN(MQN) + NB(ECfp4)
CHEMBL3891172	CHEMBL2835	1	ppb2_NN(MQN) + NB(ECfp4)
CHEMBL3891228	CHEMBL209	1	ppb2_NN(MQN) + NB(ECfp4)
CHEMBL3891228	CHEMBL1741195	2	ppb2_NN(MQN) + NB(ECfp4)
CHEMBL3891851	CHEMBL5407	1	ppb2_NN(MQN) + NB(ECfp4)
CHEMBL3891851	CHEMBL2147	2	ppb2_NN(MQN) + NB(ECfp4)
CHEMBL3891851	CHEMBL4523	3	ppb2_NN(MQN) + NB(ECfp4)
CHEMBL3892509	CHEMBL5407	1	ppb2_NN(MQN) + NB(ECfp4)
CHEMBL3892509	CHEMBL2147	3	ppb2_NN(MQN) + NB(ECfp4)
CHEMBL3892536	CHEMBL5407	1	ppb2_NN(MQN) + NB(ECfp4)
CHEMBL3892536	CHEMBL2147	3	ppb2_NN(MQN) + NB(ECfp4)
CHEMBL3892885	CHEMBL5407	1	ppb2_NN(MQN) + NB(ECfp4)
CHEMBL3892885	CHEMBL4523	2	ppb2_NN(MQN) + NB(ECfp4)
CHEMBL3892885	CHEMBL2147	3	ppb2_NN(MQN) + NB(ECfp4)
CHEMBL3893327	CHEMBL2148	1	ppb2_NN(MQN) + NB(ECfp4)
CHEMBL3893327	CHEMBL2971	3	ppb2_NN(MQN) + NB(ECfp4)
CHEMBL3893449	CHEMBL2835	2	ppb2_NN(MQN) + NB(ECfp4)
CHEMBL3893643	CHEMBL237	1	ppb2_NN(MQN) + NB(ECfp4)
CHEMBL3893643	CHEMBL233	3	ppb2_NN(MQN) + NB(ECfp4)
CHEMBL3894557	CHEMBL233	1	ppb2_NN(MQN) + NB(ECfp4)
CHEMBL3894571	CHEMBL2292	1	ppb2_NN(MQN) + NB(ECfp4)
CHEMBL3894571	CHEMBL5543	2	ppb2_NN(MQN) + NB(ECfp4)
CHEMBL3894688	CHEMBL2835	6	ppb2_NN(MQN) + NB(ECfp4)
CHEMBL3895094	CHEMBL5407	1	ppb2_NN(MQN) + NB(ECfp4)
CHEMBL3895094	CHEMBL2147	3	ppb2_NN(MQN) + NB(ECfp4)
CHEMBL3895272	CHEMBL2835	1	ppb2_NN(MQN) + NB(ECfp4)
CHEMBL3895272	CHEMBL2971	4	ppb2_NN(MQN) + NB(ECfp4)
CHEMBL3895531	CHEMBL5407	1	ppb2_NN(MQN) + NB(ECfp4)
CHEMBL3895531	CHEMBL2147	4	ppb2_NN(MQN) + NB(ECfp4)
CHEMBL3895540	CHEMBL217	1	ppb2_NN(MQN) + NB(ECfp4)
CHEMBL3895925	CHEMBL2835	1	ppb2_NN(MQN) + NB(ECfp4)
CHEMBL3895998	CHEMBL262	4	ppb2_NN(MQN) + NB(ECfp4)
CHEMBL3896124	CHEMBL2147	6	ppb2_NN(MQN) + NB(ECfp4)
CHEMBL3896124	CHEMBL4523	7	ppb2_NN(MQN) + NB(ECfp4)
CHEMBL3896244	CHEMBL2147	1	ppb2_NN(MQN) + NB(ECfp4)
CHEMBL3896244	CHEMBL4523	3	ppb2_NN(MQN) + NB(ECfp4)
CHEMBL3896312	CHEMBL5407	1	ppb2_NN(MQN) + NB(ECfp4)
CHEMBL3896312	CHEMBL4523	2	ppb2_NN(MQN) + NB(ECfp4)
CHEMBL3896312	CHEMBL2147	3	ppb2_NN(MQN) + NB(ECfp4)
CHEMBL3896379	CHEMBL2835	1	ppb2_NN(MQN) + NB(ECfp4)
CHEMBL3896759	CHEMBL2835	8	ppb2_NN(MQN) + NB(ECfp4)
CHEMBL3896782	CHEMBL2147	4	ppb2_NN(MQN) + NB(ECfp4)
CHEMBL3896791	CHEMBL209	1	ppb2_NN(MQN) + NB(ECfp4)
CHEMBL3896791	CHEMBL1741195	2	ppb2_NN(MQN) + NB(ECfp4)
CHEMBL3896877	CHEMBL233	1	ppb2_NN(MQN) + NB(ECfp4)
CHEMBL3896877	CHEMBL237	2	ppb2_NN(MQN) + NB(ECfp4)
CHEMBL3896937	CHEMBL217	1	ppb2_NN(MQN) + NB(ECfp4)
CHEMBL3896937	CHEMBL224	2	ppb2_NN(MQN) + NB(ECfp4)
CHEMBL3896937	CHEMBL234	6	ppb2_NN(MQN) + NB(ECfp4)
CHEMBL3897068	CHEMBL237	1	ppb2_NN(MQN) + NB(ECfp4)
CHEMBL3897068	CHEMBL233	2	ppb2_NN(MQN) + NB(ECfp4)
CHEMBL3897108	CHEMBL209	1	ppb2_NN(MQN) + NB(ECfp4)
CHEMBL3897108	CHEMBL1741195	2	ppb2_NN(MQN) + NB(ECfp4)
CHEMBL3897112	CHEMBL2835	2	ppb2_NN(MQN) + NB(ECfp4)
CHEMBL3897112	CHEMBL2971	5	ppb2_NN(MQN) + NB(ECfp4)
CHEMBL3897323	CHEMBL2147	2	ppb2_NN(MQN) + NB(ECfp4)
CHEMBL3897323	CHEMBL4523	3	ppb2_NN(MQN) + NB(ECfp4)
CHEMBL3897417	CHEMBL2148	5	ppb2_NN(MQN) + NB(ECfp4)
CHEMBL3897912	CHEMBL5407	1	ppb2_NN(MQN) + NB(ECfp4)
CHEMBL3897912	CHEMBL4523	2	ppb2_NN(MQN) + NB(ECfp4)
CHEMBL3897912	CHEMBL2147	3	ppb2_NN(MQN) + NB(ECfp4)
CHEMBL3897967	CHEMBL237	1	ppb2_NN(MQN) + NB(ECfp4)
CHEMBL3897967	CHEMBL233	2	ppb2_NN(MQN) + NB(ECfp4)
CHEMBL3897993	CHEMBL2835	4	ppb2_NN(MQN) + NB(ECfp4)
CHEMBL3898989	CHEMBL5407	1	ppb2_NN(MQN) + NB(ECfp4)
CHEMBL3898989	CHEMBL4523	2	ppb2_NN(MQN) + NB(ECfp4)
CHEMBL3898989	CHEMBL2147	3	ppb2_NN(MQN) + NB(ECfp4)
CHEMBL3899109	CHEMBL2835	2	ppb2_NN(MQN) + NB(ECfp4)
CHEMBL3899281	CHEMBL2835	1	ppb2_NN(MQN) + NB(ECfp4)
CHEMBL3899672	CHEMBL2148	1	ppb2_NN(MQN) + NB(ECfp4)
CHEMBL3899672	CHEMBL2971	3	ppb2_NN(MQN) + NB(ECfp4)
CHEMBL3899672	CHEMBL2835	4	ppb2_NN(MQN) + NB(ECfp4)
CHEMBL3899762	CHEMBL2835	2	ppb2_NN(MQN) + NB(ECfp4)
CHEMBL3900248	CHEMBL209	1	ppb2_NN(MQN) + NB(ECfp4)
CHEMBL3900248	CHEMBL1741195	2	ppb2_NN(MQN) + NB(ECfp4)
CHEMBL3900258	CHEMBL5407	1	ppb2_NN(MQN) + NB(ECfp4)
CHEMBL3900258	CHEMBL2147	4	ppb2_NN(MQN) + NB(ECfp4)
CHEMBL3900425	CHEMBL2147	1	ppb2_NN(MQN) + NB(ECfp4)
CHEMBL3900425	CHEMBL4523	2	ppb2_NN(MQN) + NB(ECfp4)
CHEMBL3900425	CHEMBL5407	3	ppb2_NN(MQN) + NB(ECfp4)
CHEMBL3900752	CHEMBL217	1	ppb2_NN(MQN) + NB(ECfp4)
CHEMBL3900752	CHEMBL224	2	ppb2_NN(MQN) + NB(ECfp4)
CHEMBL3900795	CHEMBL2147	2	ppb2_NN(MQN) + NB(ECfp4)
CHEMBL3900795	CHEMBL4523	3	ppb2_NN(MQN) + NB(ECfp4)
CHEMBL3901124	CHEMBL2148	1	ppb2_NN(MQN) + NB(ECfp4)
CHEMBL3901124	CHEMBL2835	2	ppb2_NN(MQN) + NB(ECfp4)
CHEMBL3901124	CHEMBL2971	3	ppb2_NN(MQN) + NB(ECfp4)
CHEMBL3901134	CHEMBL2971	2	ppb2_NN(MQN) + NB(ECfp4)
CHEMBL3901134	CHEMBL2835	4	ppb2_NN(MQN) + NB(ECfp4)
CHEMBL3901481	CHEMBL5407	1	ppb2_NN(MQN) + NB(ECfp4)
CHEMBL3901481	CHEMBL2147	2	ppb2_NN(MQN) + NB(ECfp4)
CHEMBL3902417	CHEMBL5407	1	ppb2_NN(MQN) + NB(ECfp4)
CHEMBL3902417	CHEMBL2147	2	ppb2_NN(MQN) + NB(ECfp4)
CHEMBL3902542	CHEMBL2148	1	ppb2_NN(MQN) + NB(ECfp4)
CHEMBL3902542	CHEMBL2971	5	ppb2_NN(MQN) + NB(ECfp4)
CHEMBL3902579	CHEMBL2835	1	ppb2_NN(MQN) + NB(ECfp4)
CHEMBL3902579	CHEMBL2971	5	ppb2_NN(MQN) + NB(ECfp4)
CHEMBL3903218	CHEMBL2835	2	ppb2_NN(MQN) + NB(ECfp4)
CHEMBL3903272	CHEMBL4625	1	ppb2_NN(MQN) + NB(ECfp4)
CHEMBL3903272	CHEMBL4860	2	ppb2_NN(MQN) + NB(ECfp4)
CHEMBL3903274	CHEMBL5145	5	ppb2_NN(MQN) + NB(ECfp4)
CHEMBL3903286	CHEMBL2971	1	ppb2_NN(MQN) + NB(ECfp4)
CHEMBL3903286	CHEMBL2148	3	ppb2_NN(MQN) + NB(ECfp4)
CHEMBL3903560	CHEMBL224	2	ppb2_NN(MQN) + NB(ECfp4)
CHEMBL3903560	CHEMBL234	4	ppb2_NN(MQN) + NB(ECfp4)
CHEMBL3903686	CHEMBL4523	6	ppb2_NN(MQN) + NB(ECfp4)
CHEMBL3903686	CHEMBL2147	9	ppb2_NN(MQN) + NB(ECfp4)
CHEMBL3903777	CHEMBL1741195	1	ppb2_NN(MQN) + NB(ECfp4)
CHEMBL3903777	CHEMBL209	2	ppb2_NN(MQN) + NB(ECfp4)
CHEMBL3903837	CHEMBL2147	1	ppb2_NN(MQN) + NB(ECfp4)
CHEMBL3903837	CHEMBL4523	2	ppb2_NN(MQN) + NB(ECfp4)
CHEMBL3904282	CHEMBL2147	2	ppb2_NN(MQN) + NB(ECfp4)
CHEMBL3904282	CHEMBL4523	3	ppb2_NN(MQN) + NB(ECfp4)
CHEMBL3904982	CHEMBL2835	5	ppb2_NN(MQN) + NB(ECfp4)
CHEMBL3905144	CHEMBL2147	1	ppb2_NN(MQN) + NB(ECfp4)
CHEMBL3905144	CHEMBL4523	3	ppb2_NN(MQN) + NB(ECfp4)
CHEMBL3905150	CHEMBL2835	1	ppb2_NN(MQN) + NB(ECfp4)
CHEMBL3905150	CHEMBL2148	2	ppb2_NN(MQN) + NB(ECfp4)
CHEMBL3905194	CHEMBL2147	2	ppb2_NN(MQN) + NB(ECfp4)
CHEMBL3905194	CHEMBL4523	3	ppb2_NN(MQN) + NB(ECfp4)
CHEMBL3905247	CHEMBL217	1	ppb2_NN(MQN) + NB(ECfp4)
CHEMBL3905247	CHEMBL224	2	ppb2_NN(MQN) + NB(ECfp4)
CHEMBL3905247	CHEMBL234	3	ppb2_NN(MQN) + NB(ECfp4)
CHEMBL3905788	CHEMBL2835	4	ppb2_NN(MQN) + NB(ECfp4)
CHEMBL3906357	CHEMBL2147	4	ppb2_NN(MQN) + NB(ECfp4)
CHEMBL3906357	CHEMBL4523	6	ppb2_NN(MQN) + NB(ECfp4)
CHEMBL3906421	CHEMBL5407	1	ppb2_NN(MQN) + NB(ECfp4)
CHEMBL3906421	CHEMBL2147	3	ppb2_NN(MQN) + NB(ECfp4)
CHEMBL3906798	CHEMBL5407	1	ppb2_NN(MQN) + NB(ECfp4)
CHEMBL3906798	CHEMBL4523	2	ppb2_NN(MQN) + NB(ECfp4)
CHEMBL3906798	CHEMBL2147	3	ppb2_NN(MQN) + NB(ECfp4)
CHEMBL3906885	CHEMBL2148	1	ppb2_NN(MQN) + NB(ECfp4)
CHEMBL3906885	CHEMBL2971	3	ppb2_NN(MQN) + NB(ECfp4)
CHEMBL3907010	CHEMBL3105	1	ppb2_NN(MQN) + NB(ECfp4)
CHEMBL3907320	CHEMBL2147	1	ppb2_NN(MQN) + NB(ECfp4)
CHEMBL3907320	CHEMBL5407	2	ppb2_NN(MQN) + NB(ECfp4)
CHEMBL3907536	CHEMBL209	1	ppb2_NN(MQN) + NB(ECfp4)
CHEMBL3907536	CHEMBL1741195	2	ppb2_NN(MQN) + NB(ECfp4)
CHEMBL3907732	CHEMBL2147	1	ppb2_NN(MQN) + NB(ECfp4)
CHEMBL3907732	CHEMBL4523	2	ppb2_NN(MQN) + NB(ECfp4)
CHEMBL3908233	CHEMBL2835	1	ppb2_NN(MQN) + NB(ECfp4)
CHEMBL3908328	CHEMBL2971	9	ppb2_NN(MQN) + NB(ECfp4)
CHEMBL3909091	CHEMBL2835	1	ppb2_NN(MQN) + NB(ECfp4)
CHEMBL3909091	CHEMBL2971	6	ppb2_NN(MQN) + NB(ECfp4)
CHEMBL3909092	CHEMBL2835	2	ppb2_NN(MQN) + NB(ECfp4)
CHEMBL3909092	CHEMBL2971	4	ppb2_NN(MQN) + NB(ECfp4)
CHEMBL3909280	CHEMBL5407	1	ppb2_NN(MQN) + NB(ECfp4)
CHEMBL3909280	CHEMBL4523	2	ppb2_NN(MQN) + NB(ECfp4)
CHEMBL3909280	CHEMBL2147	3	ppb2_NN(MQN) + NB(ECfp4)
CHEMBL3909568	CHEMBL2835	7	ppb2_NN(MQN) + NB(ECfp4)
CHEMBL3909785	CHEMBL2147	9	ppb2_NN(MQN) + NB(ECfp4)
CHEMBL3909947	CHEMBL5407	1	ppb2_NN(MQN) + NB(ECfp4)
CHEMBL3909947	CHEMBL2147	2	ppb2_NN(MQN) + NB(ECfp4)
CHEMBL3910228	CHEMBL4822	1	ppb2_NN(MQN) + NB(ECfp4)
CHEMBL3910228	CHEMBL2525	2	ppb2_NN(MQN) + NB(ECfp4)
CHEMBL3911037	CHEMBL1945	1	ppb2_NN(MQN) + NB(ECfp4)
CHEMBL3911037	CHEMBL1946	2	ppb2_NN(MQN) + NB(ECfp4)
CHEMBL3911942	CHEMBL2835	1	ppb2_NN(MQN) + NB(ECfp4)
CHEMBL3912892	CHEMBL2971	8	ppb2_NN(MQN) + NB(ECfp4)
CHEMBL3912919	CHEMBL2835	4	ppb2_NN(MQN) + NB(ECfp4)
CHEMBL3913540	CHEMBL2147	2	ppb2_NN(MQN) + NB(ECfp4)
CHEMBL3913540	CHEMBL4523	3	ppb2_NN(MQN) + NB(ECfp4)
CHEMBL3913691	CHEMBL224	3	ppb2_NN(MQN) + NB(ECfp4)
CHEMBL3913691	CHEMBL234	4	ppb2_NN(MQN) + NB(ECfp4)
CHEMBL3914162	CHEMBL2835	3	ppb2_NN(MQN) + NB(ECfp4)
CHEMBL3914221	CHEMBL2835	4	ppb2_NN(MQN) + NB(ECfp4)
CHEMBL3914438	CHEMBL2148	4	ppb2_NN(MQN) + NB(ECfp4)
CHEMBL3914475	CHEMBL2148	1	ppb2_NN(MQN) + NB(ECfp4)
CHEMBL3914475	CHEMBL2835	2	ppb2_NN(MQN) + NB(ECfp4)
CHEMBL3914629	CHEMBL209	1	ppb2_NN(MQN) + NB(ECfp4)
CHEMBL3914629	CHEMBL1741195	2	ppb2_NN(MQN) + NB(ECfp4)
CHEMBL3914639	CHEMBL5407	1	ppb2_NN(MQN) + NB(ECfp4)
CHEMBL3914639	CHEMBL4523	2	ppb2_NN(MQN) + NB(ECfp4)
CHEMBL3914639	CHEMBL2147	3	ppb2_NN(MQN) + NB(ECfp4)
CHEMBL3915323	CHEMBL5407	1	ppb2_NN(MQN) + NB(ECfp4)
CHEMBL3915323	CHEMBL2147	7	ppb2_NN(MQN) + NB(ECfp4)
CHEMBL3915865	CHEMBL2835	1	ppb2_NN(MQN) + NB(ECfp4)
CHEMBL3915913	CHEMBL5407	1	ppb2_NN(MQN) + NB(ECfp4)
CHEMBL3915913	CHEMBL2147	3	ppb2_NN(MQN) + NB(ECfp4)
CHEMBL3915972	CHEMBL2835	1	ppb2_NN(MQN) + NB(ECfp4)
CHEMBL3916092	CHEMBL3629	1	ppb2_NN(MQN) + NB(ECfp4)
CHEMBL3916122	CHEMBL237	1	ppb2_NN(MQN) + NB(ECfp4)
CHEMBL3916122	CHEMBL233	3	ppb2_NN(MQN) + NB(ECfp4)
CHEMBL3916604	CHEMBL209	1	ppb2_NN(MQN) + NB(ECfp4)
CHEMBL3916604	CHEMBL1741195	2	ppb2_NN(MQN) + NB(ECfp4)
CHEMBL3916902	CHEMBL5407	1	ppb2_NN(MQN) + NB(ECfp4)
CHEMBL3916902	CHEMBL2147	2	ppb2_NN(MQN) + NB(ECfp4)
CHEMBL3916925	CHEMBL2835	2	ppb2_NN(MQN) + NB(ECfp4)
CHEMBL3916961	CHEMBL1908	1	ppb2_NN(MQN) + NB(ECfp4)
CHEMBL3916961	CHEMBL2722	2	ppb2_NN(MQN) + NB(ECfp4)
CHEMBL3917077	CHEMBL5407	1	ppb2_NN(MQN) + NB(ECfp4)
CHEMBL3917077	CHEMBL2147	2	ppb2_NN(MQN) + NB(ECfp4)
CHEMBL3917854	CHEMBL2835	2	ppb2_NN(MQN) + NB(ECfp4)
CHEMBL3917906	CHEMBL2148	1	ppb2_NN(MQN) + NB(ECfp4)
CHEMBL3917906	CHEMBL2835	2	ppb2_NN(MQN) + NB(ECfp4)
CHEMBL3917906	CHEMBL2971	3	ppb2_NN(MQN) + NB(ECfp4)
CHEMBL3918076	CHEMBL2147	2	ppb2_NN(MQN) + NB(ECfp4)
CHEMBL3918076	CHEMBL4523	3	ppb2_NN(MQN) + NB(ECfp4)
CHEMBL3918273	CHEMBL4523	3	ppb2_NN(MQN) + NB(ECfp4)
CHEMBL3918755	CHEMBL217	1	ppb2_NN(MQN) + NB(ECfp4)
CHEMBL3918755	CHEMBL224	2	ppb2_NN(MQN) + NB(ECfp4)
CHEMBL3918755	CHEMBL234	6	ppb2_NN(MQN) + NB(ECfp4)
CHEMBL3919205	CHEMBL5145	5	ppb2_NN(MQN) + NB(ECfp4)
CHEMBL3919646	CHEMBL2147	2	ppb2_NN(MQN) + NB(ECfp4)
CHEMBL3919646	CHEMBL4523	3	ppb2_NN(MQN) + NB(ECfp4)
CHEMBL3919799	CHEMBL2148	1	ppb2_NN(MQN) + NB(ECfp4)
CHEMBL3919799	CHEMBL2971	5	ppb2_NN(MQN) + NB(ECfp4)
CHEMBL3919848	CHEMBL1741195	1	ppb2_NN(MQN) + NB(ECfp4)
CHEMBL3919848	CHEMBL209	2	ppb2_NN(MQN) + NB(ECfp4)
CHEMBL3920142	CHEMBL2835	1	ppb2_NN(MQN) + NB(ECfp4)
CHEMBL3920142	CHEMBL2971	6	ppb2_NN(MQN) + NB(ECfp4)
CHEMBL3920252	CHEMBL217	1	ppb2_NN(MQN) + NB(ECfp4)
CHEMBL3920252	CHEMBL224	2	ppb2_NN(MQN) + NB(ECfp4)
CHEMBL3920252	CHEMBL234	6	ppb2_NN(MQN) + NB(ECfp4)
CHEMBL3920292	CHEMBL2835	2	ppb2_NN(MQN) + NB(ECfp4)
CHEMBL3920418	CHEMBL2835	1	ppb2_NN(MQN) + NB(ECfp4)
CHEMBL3920484	CHEMBL2148	1	ppb2_NN(MQN) + NB(ECfp4)
CHEMBL3920484	CHEMBL2971	3	ppb2_NN(MQN) + NB(ECfp4)
CHEMBL3920484	CHEMBL2835	4	ppb2_NN(MQN) + NB(ECfp4)
CHEMBL3920581	CHEMBL2148	1	ppb2_NN(MQN) + NB(ECfp4)
CHEMBL3920581	CHEMBL2971	3	ppb2_NN(MQN) + NB(ECfp4)
CHEMBL3920600	CHEMBL2147	1	ppb2_NN(MQN) + NB(ECfp4)
CHEMBL3920600	CHEMBL4523	4	ppb2_NN(MQN) + NB(ECfp4)
CHEMBL3920627	CHEMBL209	1	ppb2_NN(MQN) + NB(ECfp4)
CHEMBL3920627	CHEMBL1741195	2	ppb2_NN(MQN) + NB(ECfp4)
CHEMBL3920681	CHEMBL2148	1	ppb2_NN(MQN) + NB(ECfp4)
CHEMBL3920681	CHEMBL2835	6	ppb2_NN(MQN) + NB(ECfp4)
CHEMBL3920824	CHEMBL2835	2	ppb2_NN(MQN) + NB(ECfp4)
CHEMBL3921320	CHEMBL2148	1	ppb2_NN(MQN) + NB(ECfp4)
CHEMBL3921320	CHEMBL2971	8	ppb2_NN(MQN) + NB(ECfp4)
CHEMBL3921976	CHEMBL2014	1	ppb2_NN(MQN) + NB(ECfp4)
CHEMBL3921976	CHEMBL233	2	ppb2_NN(MQN) + NB(ECfp4)
CHEMBL3922069	CHEMBL2835	1	ppb2_NN(MQN) + NB(ECfp4)
CHEMBL3922831	CHEMBL2835	3	ppb2_NN(MQN) + NB(ECfp4)
CHEMBL3923240	CHEMBL224	2	ppb2_NN(MQN) + NB(ECfp4)
CHEMBL3923240	CHEMBL214	9	ppb2_NN(MQN) + NB(ECfp4)
CHEMBL3924226	CHEMBL2835	2	ppb2_NN(MQN) + NB(ECfp4)
CHEMBL3924451	CHEMBL2835	2	ppb2_NN(MQN) + NB(ECfp4)
CHEMBL3924451	CHEMBL2971	5	ppb2_NN(MQN) + NB(ECfp4)
CHEMBL3924903	CHEMBL5407	1	ppb2_NN(MQN) + NB(ECfp4)
CHEMBL3924903	CHEMBL4523	2	ppb2_NN(MQN) + NB(ECfp4)
CHEMBL3924903	CHEMBL2147	3	ppb2_NN(MQN) + NB(ECfp4)
CHEMBL3925605	CHEMBL2148	1	ppb2_NN(MQN) + NB(ECfp4)
CHEMBL3925605	CHEMBL2971	3	ppb2_NN(MQN) + NB(ECfp4)
CHEMBL3925919	CHEMBL2835	2	ppb2_NN(MQN) + NB(ECfp4)
CHEMBL3926007	CHEMBL5407	1	ppb2_NN(MQN) + NB(ECfp4)
CHEMBL3926007	CHEMBL4523	2	ppb2_NN(MQN) + NB(ECfp4)
CHEMBL3926007	CHEMBL2147	3	ppb2_NN(MQN) + NB(ECfp4)
CHEMBL3926009	CHEMBL2835	2	ppb2_NN(MQN) + NB(ECfp4)
CHEMBL3926009	CHEMBL2971	9	ppb2_NN(MQN) + NB(ECfp4)
CHEMBL3926059	CHEMBL2148	1	ppb2_NN(MQN) + NB(ECfp4)
CHEMBL3926059	CHEMBL2971	2	ppb2_NN(MQN) + NB(ECfp4)
CHEMBL3926930	CHEMBL2148	1	ppb2_NN(MQN) + NB(ECfp4)
CHEMBL3926930	CHEMBL2971	2	ppb2_NN(MQN) + NB(ECfp4)
CHEMBL3927136	CHEMBL237	1	ppb2_NN(MQN) + NB(ECfp4)
CHEMBL3927136	CHEMBL233	2	ppb2_NN(MQN) + NB(ECfp4)
CHEMBL3927952	CHEMBL5407	1	ppb2_NN(MQN) + NB(ECfp4)
CHEMBL3927952	CHEMBL4523	2	ppb2_NN(MQN) + NB(ECfp4)
CHEMBL3927952	CHEMBL2147	3	ppb2_NN(MQN) + NB(ECfp4)
CHEMBL3928129	CHEMBL2835	2	ppb2_NN(MQN) + NB(ECfp4)
CHEMBL3928249	CHEMBL2835	5	ppb2_NN(MQN) + NB(ECfp4)
CHEMBL3928595	CHEMBL2147	2	ppb2_NN(MQN) + NB(ECfp4)
CHEMBL3929011	CHEMBL5407	1	ppb2_NN(MQN) + NB(ECfp4)
CHEMBL3929011	CHEMBL4523	2	ppb2_NN(MQN) + NB(ECfp4)
CHEMBL3929011	CHEMBL2147	3	ppb2_NN(MQN) + NB(ECfp4)
CHEMBL3929168	CHEMBL217	1	ppb2_NN(MQN) + NB(ECfp4)
CHEMBL3929168	CHEMBL224	2	ppb2_NN(MQN) + NB(ECfp4)
CHEMBL3929168	CHEMBL234	3	ppb2_NN(MQN) + NB(ECfp4)
CHEMBL3929264	CHEMBL5407	1	ppb2_NN(MQN) + NB(ECfp4)
CHEMBL3929264	CHEMBL2147	2	ppb2_NN(MQN) + NB(ECfp4)
CHEMBL3929534	CHEMBL209	1	ppb2_NN(MQN) + NB(ECfp4)
CHEMBL3929534	CHEMBL1741195	2	ppb2_NN(MQN) + NB(ECfp4)
CHEMBL3929573	CHEMBL2835	2	ppb2_NN(MQN) + NB(ECfp4)
CHEMBL3930290	CHEMBL2148	1	ppb2_NN(MQN) + NB(ECfp4)
CHEMBL3930290	CHEMBL2971	2	ppb2_NN(MQN) + NB(ECfp4)
CHEMBL3930305	CHEMBL2835	2	ppb2_NN(MQN) + NB(ECfp4)
CHEMBL3930305	CHEMBL2971	6	ppb2_NN(MQN) + NB(ECfp4)
CHEMBL3930515	CHEMBL2722	1	ppb2_NN(MQN) + NB(ECfp4)
CHEMBL3930515	CHEMBL1908	2	ppb2_NN(MQN) + NB(ECfp4)
CHEMBL3930620	CHEMBL325	1	ppb2_NN(MQN) + NB(ECfp4)
CHEMBL3930620	CHEMBL203	4	ppb2_NN(MQN) + NB(ECfp4)
CHEMBL3930712	CHEMBL2148	1	ppb2_NN(MQN) + NB(ECfp4)
CHEMBL3931150	CHEMBL2835	2	ppb2_NN(MQN) + NB(ECfp4)
CHEMBL3931274	CHEMBL5407	1	ppb2_NN(MQN) + NB(ECfp4)
CHEMBL3931274	CHEMBL2147	4	ppb2_NN(MQN) + NB(ECfp4)
CHEMBL3931278	CHEMBL2835	1	ppb2_NN(MQN) + NB(ECfp4)
CHEMBL3931279	CHEMBL5407	1	ppb2_NN(MQN) + NB(ECfp4)
CHEMBL3931279	CHEMBL2147	3	ppb2_NN(MQN) + NB(ECfp4)
CHEMBL3932186	CHEMBL224	2	ppb2_NN(MQN) + NB(ECfp4)
CHEMBL3932186	CHEMBL234	9	ppb2_NN(MQN) + NB(ECfp4)
CHEMBL3932460	CHEMBL2147	2	ppb2_NN(MQN) + NB(ECfp4)
CHEMBL3932460	CHEMBL4523	3	ppb2_NN(MQN) + NB(ECfp4)
CHEMBL3932881	CHEMBL2835	8	ppb2_NN(MQN) + NB(ECfp4)
CHEMBL3933766	CHEMBL2835	10	ppb2_NN(MQN) + NB(ECfp4)
CHEMBL3933868	CHEMBL5407	1	ppb2_NN(MQN) + NB(ECfp4)
CHEMBL3933868	CHEMBL2147	2	ppb2_NN(MQN) + NB(ECfp4)
CHEMBL3934335	CHEMBL2835	2	ppb2_NN(MQN) + NB(ECfp4)
CHEMBL3934383	CHEMBL5407	1	ppb2_NN(MQN) + NB(ECfp4)
CHEMBL3934383	CHEMBL2147	2	ppb2_NN(MQN) + NB(ECfp4)
CHEMBL3934383	CHEMBL4523	3	ppb2_NN(MQN) + NB(ECfp4)
CHEMBL3934709	CHEMBL2835	1	ppb2_NN(MQN) + NB(ECfp4)
CHEMBL3934709	CHEMBL2971	8	ppb2_NN(MQN) + NB(ECfp4)
CHEMBL3934942	CHEMBL2148	1	ppb2_NN(MQN) + NB(ECfp4)
CHEMBL3934942	CHEMBL2971	2	ppb2_NN(MQN) + NB(ECfp4)
CHEMBL3934963	CHEMBL2835	2	ppb2_NN(MQN) + NB(ECfp4)
CHEMBL3935018	CHEMBL5407	1	ppb2_NN(MQN) + NB(ECfp4)
CHEMBL3935018	CHEMBL4523	2	ppb2_NN(MQN) + NB(ECfp4)
CHEMBL3935018	CHEMBL2147	3	ppb2_NN(MQN) + NB(ECfp4)
CHEMBL3935096	CHEMBL5407	1	ppb2_NN(MQN) + NB(ECfp4)
CHEMBL3935096	CHEMBL4523	2	ppb2_NN(MQN) + NB(ECfp4)
CHEMBL3935096	CHEMBL2147	3	ppb2_NN(MQN) + NB(ECfp4)
CHEMBL3935178	CHEMBL2835	1	ppb2_NN(MQN) + NB(ECfp4)
CHEMBL3935396	CHEMBL2835	2	ppb2_NN(MQN) + NB(ECfp4)
CHEMBL3936320	CHEMBL2147	1	ppb2_NN(MQN) + NB(ECfp4)
CHEMBL3936320	CHEMBL4523	3	ppb2_NN(MQN) + NB(ECfp4)
CHEMBL3936541	CHEMBL2835	3	ppb2_NN(MQN) + NB(ECfp4)
CHEMBL3936990	CHEMBL4282	8	ppb2_NN(MQN) + NB(ECfp4)
CHEMBL3936992	CHEMBL2147	1	ppb2_NN(MQN) + NB(ECfp4)
CHEMBL3936992	CHEMBL4523	2	ppb2_NN(MQN) + NB(ECfp4)
CHEMBL3937034	CHEMBL2147	1	ppb2_NN(MQN) + NB(ECfp4)
CHEMBL3937034	CHEMBL5407	2	ppb2_NN(MQN) + NB(ECfp4)
CHEMBL3937204	CHEMBL2148	1	ppb2_NN(MQN) + NB(ECfp4)
CHEMBL3937204	CHEMBL2971	3	ppb2_NN(MQN) + NB(ECfp4)
CHEMBL3937222	CHEMBL209	1	ppb2_NN(MQN) + NB(ECfp4)
CHEMBL3937222	CHEMBL1741195	2	ppb2_NN(MQN) + NB(ECfp4)
CHEMBL3937835	CHEMBL2148	1	ppb2_NN(MQN) + NB(ECfp4)
CHEMBL3937835	CHEMBL2971	3	ppb2_NN(MQN) + NB(ECfp4)
CHEMBL3937835	CHEMBL2835	5	ppb2_NN(MQN) + NB(ECfp4)
CHEMBL3937878	CHEMBL2835	7	ppb2_NN(MQN) + NB(ECfp4)
CHEMBL3937878	CHEMBL2971	9	ppb2_NN(MQN) + NB(ECfp4)
CHEMBL3937927	CHEMBL2835	3	ppb2_NN(MQN) + NB(ECfp4)
CHEMBL3937927	CHEMBL2971	8	ppb2_NN(MQN) + NB(ECfp4)
CHEMBL3937972	CHEMBL2742	3	ppb2_NN(MQN) + NB(ECfp4)
CHEMBL3938031	CHEMBL2835	1	ppb2_NN(MQN) + NB(ECfp4)
CHEMBL3938210	CHEMBL217	1	ppb2_NN(MQN) + NB(ECfp4)
CHEMBL3938210	CHEMBL224	2	ppb2_NN(MQN) + NB(ECfp4)
CHEMBL3938210	CHEMBL214	5	ppb2_NN(MQN) + NB(ECfp4)
CHEMBL3938210	CHEMBL234	6	ppb2_NN(MQN) + NB(ECfp4)
CHEMBL3938583	CHEMBL5407	1	ppb2_NN(MQN) + NB(ECfp4)
CHEMBL3938583	CHEMBL2147	2	ppb2_NN(MQN) + NB(ECfp4)
CHEMBL3938660	CHEMBL2835	3	ppb2_NN(MQN) + NB(ECfp4)
CHEMBL3938720	CHEMBL2835	10	ppb2_NN(MQN) + NB(ECfp4)
CHEMBL3939101	CHEMBL5407	1	ppb2_NN(MQN) + NB(ECfp4)
CHEMBL3939101	CHEMBL2147	3	ppb2_NN(MQN) + NB(ECfp4)
CHEMBL3939394	CHEMBL5407	1	ppb2_NN(MQN) + NB(ECfp4)
CHEMBL3939394	CHEMBL2147	3	ppb2_NN(MQN) + NB(ECfp4)
CHEMBL3939580	CHEMBL2148	1	ppb2_NN(MQN) + NB(ECfp4)
CHEMBL3939580	CHEMBL2835	2	ppb2_NN(MQN) + NB(ECfp4)
CHEMBL3940227	CHEMBL5407	1	ppb2_NN(MQN) + NB(ECfp4)
CHEMBL3940227	CHEMBL2147	3	ppb2_NN(MQN) + NB(ECfp4)
CHEMBL3940712	CHEMBL224	2	ppb2_NN(MQN) + NB(ECfp4)
CHEMBL3940712	CHEMBL234	6	ppb2_NN(MQN) + NB(ECfp4)
CHEMBL3940744	CHEMBL5407	1	ppb2_NN(MQN) + NB(ECfp4)
CHEMBL3940744	CHEMBL4523	2	ppb2_NN(MQN) + NB(ECfp4)
CHEMBL3940744	CHEMBL2147	3	ppb2_NN(MQN) + NB(ECfp4)
CHEMBL3941202	CHEMBL2835	1	ppb2_NN(MQN) + NB(ECfp4)
CHEMBL3941202	CHEMBL2971	2	ppb2_NN(MQN) + NB(ECfp4)
CHEMBL3941211	CHEMBL2148	1	ppb2_NN(MQN) + NB(ECfp4)
CHEMBL3942104	CHEMBL5407	10	ppb2_NN(MQN) + NB(ECfp4)
CHEMBL3942446	CHEMBL5407	1	ppb2_NN(MQN) + NB(ECfp4)
CHEMBL3942446	CHEMBL2147	2	ppb2_NN(MQN) + NB(ECfp4)
CHEMBL3942619	CHEMBL262	1	ppb2_NN(MQN) + NB(ECfp4)
CHEMBL3942721	CHEMBL5145	6	ppb2_NN(MQN) + NB(ECfp4)
CHEMBL3942763	CHEMBL3650	9	ppb2_NN(MQN) + NB(ECfp4)
CHEMBL3943096	CHEMBL1741195	1	ppb2_NN(MQN) + NB(ECfp4)
CHEMBL3943096	CHEMBL209	2	ppb2_NN(MQN) + NB(ECfp4)
CHEMBL3943572	CHEMBL2971	2	ppb2_NN(MQN) + NB(ECfp4)
CHEMBL3943572	CHEMBL2835	3	ppb2_NN(MQN) + NB(ECfp4)
CHEMBL3943705	CHEMBL5407	1	ppb2_NN(MQN) + NB(ECfp4)
CHEMBL3943705	CHEMBL4523	2	ppb2_NN(MQN) + NB(ECfp4)
CHEMBL3943705	CHEMBL2147	3	ppb2_NN(MQN) + NB(ECfp4)
CHEMBL3943759	CHEMBL5407	1	ppb2_NN(MQN) + NB(ECfp4)
CHEMBL3943759	CHEMBL2147	3	ppb2_NN(MQN) + NB(ECfp4)
CHEMBL3944062	CHEMBL5407	1	ppb2_NN(MQN) + NB(ECfp4)
CHEMBL3944062	CHEMBL4523	2	ppb2_NN(MQN) + NB(ECfp4)
CHEMBL3944062	CHEMBL2147	3	ppb2_NN(MQN) + NB(ECfp4)
CHEMBL3945832	CHEMBL2973	1	ppb2_NN(MQN) + NB(ECfp4)
CHEMBL3945832	CHEMBL3231	9	ppb2_NN(MQN) + NB(ECfp4)
CHEMBL3945908	CHEMBL2835	1	ppb2_NN(MQN) + NB(ECfp4)
CHEMBL3946306	CHEMBL5407	1	ppb2_NN(MQN) + NB(ECfp4)
CHEMBL3946306	CHEMBL2147	2	ppb2_NN(MQN) + NB(ECfp4)
CHEMBL3946970	CHEMBL5407	1	ppb2_NN(MQN) + NB(ECfp4)
CHEMBL3946970	CHEMBL4523	2	ppb2_NN(MQN) + NB(ECfp4)
CHEMBL3946970	CHEMBL2147	3	ppb2_NN(MQN) + NB(ECfp4)
CHEMBL3946995	CHEMBL224	2	ppb2_NN(MQN) + NB(ECfp4)
CHEMBL3946995	CHEMBL234	3	ppb2_NN(MQN) + NB(ECfp4)
CHEMBL3947213	CHEMBL2147	8	ppb2_NN(MQN) + NB(ECfp4)
CHEMBL3947292	CHEMBL2835	1	ppb2_NN(MQN) + NB(ECfp4)
CHEMBL3947309	CHEMBL5407	1	ppb2_NN(MQN) + NB(ECfp4)
CHEMBL3947309	CHEMBL2147	3	ppb2_NN(MQN) + NB(ECfp4)
CHEMBL3947456	CHEMBL2835	2	ppb2_NN(MQN) + NB(ECfp4)
CHEMBL3947456	CHEMBL2971	5	ppb2_NN(MQN) + NB(ECfp4)
CHEMBL3947484	CHEMBL5407	1	ppb2_NN(MQN) + NB(ECfp4)
CHEMBL3947484	CHEMBL2147	2	ppb2_NN(MQN) + NB(ECfp4)
CHEMBL3947540	CHEMBL2835	1	ppb2_NN(MQN) + NB(ECfp4)
CHEMBL3947770	CHEMBL5407	1	ppb2_NN(MQN) + NB(ECfp4)
CHEMBL3947770	CHEMBL2147	3	ppb2_NN(MQN) + NB(ECfp4)
CHEMBL3947977	CHEMBL2835	8	ppb2_NN(MQN) + NB(ECfp4)
CHEMBL3948056	CHEMBL217	1	ppb2_NN(MQN) + NB(ECfp4)
CHEMBL3948056	CHEMBL224	2	ppb2_NN(MQN) + NB(ECfp4)
CHEMBL3948056	CHEMBL234	5	ppb2_NN(MQN) + NB(ECfp4)
CHEMBL3948591	CHEMBL2835	3	ppb2_NN(MQN) + NB(ECfp4)
CHEMBL3948713	CHEMBL233	1	ppb2_NN(MQN) + NB(ECfp4)
CHEMBL3948713	CHEMBL237	3	ppb2_NN(MQN) + NB(ECfp4)
CHEMBL3949136	CHEMBL2973	1	ppb2_NN(MQN) + NB(ECfp4)
CHEMBL3949136	CHEMBL3231	2	ppb2_NN(MQN) + NB(ECfp4)
CHEMBL3949274	CHEMBL5407	1	ppb2_NN(MQN) + NB(ECfp4)
CHEMBL3949274	CHEMBL4523	2	ppb2_NN(MQN) + NB(ECfp4)
CHEMBL3949274	CHEMBL2147	3	ppb2_NN(MQN) + NB(ECfp4)
CHEMBL3949310	CHEMBL2835	1	ppb2_NN(MQN) + NB(ECfp4)
CHEMBL3949310	CHEMBL2971	9	ppb2_NN(MQN) + NB(ECfp4)
CHEMBL3950269	CHEMBL5407	1	ppb2_NN(MQN) + NB(ECfp4)
CHEMBL3950269	CHEMBL2147	3	ppb2_NN(MQN) + NB(ECfp4)
CHEMBL3950981	CHEMBL2835	2	ppb2_NN(MQN) + NB(ECfp4)
CHEMBL3951001	CHEMBL209	1	ppb2_NN(MQN) + NB(ECfp4)
CHEMBL3951001	CHEMBL1741195	2	ppb2_NN(MQN) + NB(ECfp4)
CHEMBL3951088	CHEMBL5407	2	ppb2_NN(MQN) + NB(ECfp4)
CHEMBL3951088	CHEMBL2147	3	ppb2_NN(MQN) + NB(ECfp4)
CHEMBL3951178	CHEMBL2971	3	ppb2_NN(MQN) + NB(ECfp4)
CHEMBL3951198	CHEMBL209	1	ppb2_NN(MQN) + NB(ECfp4)
CHEMBL3951198	CHEMBL1741195	2	ppb2_NN(MQN) + NB(ECfp4)
CHEMBL3951623	CHEMBL2148	1	ppb2_NN(MQN) + NB(ECfp4)
CHEMBL3951741	CHEMBL5407	1	ppb2_NN(MQN) + NB(ECfp4)
CHEMBL3951741	CHEMBL2147	3	ppb2_NN(MQN) + NB(ECfp4)
CHEMBL3952022	CHEMBL2835	2	ppb2_NN(MQN) + NB(ECfp4)
CHEMBL3952022	CHEMBL2971	7	ppb2_NN(MQN) + NB(ECfp4)
CHEMBL3952360	CHEMBL5407	1	ppb2_NN(MQN) + NB(ECfp4)
CHEMBL3952360	CHEMBL2147	2	ppb2_NN(MQN) + NB(ECfp4)
CHEMBL3952555	CHEMBL2148	1	ppb2_NN(MQN) + NB(ECfp4)
CHEMBL3952555	CHEMBL2971	4	ppb2_NN(MQN) + NB(ECfp4)
CHEMBL3952845	CHEMBL5407	1	ppb2_NN(MQN) + NB(ECfp4)
CHEMBL3952845	CHEMBL2147	2	ppb2_NN(MQN) + NB(ECfp4)
CHEMBL3953164	CHEMBL5407	1	ppb2_NN(MQN) + NB(ECfp4)
CHEMBL3953164	CHEMBL4523	2	ppb2_NN(MQN) + NB(ECfp4)
CHEMBL3953164	CHEMBL2147	3	ppb2_NN(MQN) + NB(ECfp4)
CHEMBL3953482	CHEMBL5407	1	ppb2_NN(MQN) + NB(ECfp4)
CHEMBL3953482	CHEMBL2147	2	ppb2_NN(MQN) + NB(ECfp4)
CHEMBL3954558	CHEMBL2148	2	ppb2_NN(MQN) + NB(ECfp4)
CHEMBL3954558	CHEMBL2971	3	ppb2_NN(MQN) + NB(ECfp4)
CHEMBL3954782	CHEMBL237	1	ppb2_NN(MQN) + NB(ECfp4)
CHEMBL3954782	CHEMBL233	2	ppb2_NN(MQN) + NB(ECfp4)
CHEMBL3954782	CHEMBL236	3	ppb2_NN(MQN) + NB(ECfp4)
CHEMBL3955604	CHEMBL5407	1	ppb2_NN(MQN) + NB(ECfp4)
CHEMBL3955604	CHEMBL2147	2	ppb2_NN(MQN) + NB(ECfp4)
CHEMBL3955743	CHEMBL5145	3	ppb2_NN(MQN) + NB(ECfp4)
CHEMBL3955757	CHEMBL2971	1	ppb2_NN(MQN) + NB(ECfp4)
CHEMBL3955757	CHEMBL2148	3	ppb2_NN(MQN) + NB(ECfp4)
CHEMBL3956075	CHEMBL2835	2	ppb2_NN(MQN) + NB(ECfp4)
CHEMBL3956155	CHEMBL5407	1	ppb2_NN(MQN) + NB(ECfp4)
CHEMBL3956155	CHEMBL2147	3	ppb2_NN(MQN) + NB(ECfp4)
CHEMBL3956529	CHEMBL2835	2	ppb2_NN(MQN) + NB(ECfp4)
CHEMBL3956529	CHEMBL2971	3	ppb2_NN(MQN) + NB(ECfp4)
CHEMBL3956717	CHEMBL2147	1	ppb2_NN(MQN) + NB(ECfp4)
CHEMBL3956717	CHEMBL5407	3	ppb2_NN(MQN) + NB(ECfp4)
CHEMBL3956720	CHEMBL217	1	ppb2_NN(MQN) + NB(ECfp4)
CHEMBL3956720	CHEMBL224	2	ppb2_NN(MQN) + NB(ECfp4)
CHEMBL3956720	CHEMBL234	3	ppb2_NN(MQN) + NB(ECfp4)
CHEMBL3956720	CHEMBL214	9	ppb2_NN(MQN) + NB(ECfp4)
CHEMBL3957073	CHEMBL4523	2	ppb2_NN(MQN) + NB(ECfp4)
CHEMBL3957073	CHEMBL2147	3	ppb2_NN(MQN) + NB(ECfp4)
CHEMBL3957106	CHEMBL209	1	ppb2_NN(MQN) + NB(ECfp4)
CHEMBL3957106	CHEMBL1741195	2	ppb2_NN(MQN) + NB(ECfp4)
CHEMBL3957132	CHEMBL2835	6	ppb2_NN(MQN) + NB(ECfp4)
CHEMBL3957195	CHEMBL2835	6	ppb2_NN(MQN) + NB(ECfp4)
CHEMBL3957231	CHEMBL2835	2	ppb2_NN(MQN) + NB(ECfp4)
CHEMBL3957231	CHEMBL2971	3	ppb2_NN(MQN) + NB(ECfp4)
CHEMBL3957954	CHEMBL2147	2	ppb2_NN(MQN) + NB(ECfp4)
CHEMBL3957954	CHEMBL4523	3	ppb2_NN(MQN) + NB(ECfp4)
CHEMBL3957997	CHEMBL5407	1	ppb2_NN(MQN) + NB(ECfp4)
CHEMBL3957997	CHEMBL2147	2	ppb2_NN(MQN) + NB(ECfp4)
CHEMBL3958253	CHEMBL5407	1	ppb2_NN(MQN) + NB(ECfp4)
CHEMBL3958253	CHEMBL2147	6	ppb2_NN(MQN) + NB(ECfp4)
CHEMBL3958307	CHEMBL2147	1	ppb2_NN(MQN) + NB(ECfp4)
CHEMBL3958307	CHEMBL4523	2	ppb2_NN(MQN) + NB(ECfp4)
CHEMBL3958785	CHEMBL5407	1	ppb2_NN(MQN) + NB(ECfp4)
CHEMBL3958785	CHEMBL2147	3	ppb2_NN(MQN) + NB(ECfp4)
CHEMBL3958969	CHEMBL280	1	ppb2_NN(MQN) + NB(ECfp4)
CHEMBL3958969	CHEMBL333	2	ppb2_NN(MQN) + NB(ECfp4)
CHEMBL3959005	CHEMBL2835	1	ppb2_NN(MQN) + NB(ECfp4)
CHEMBL3959091	CHEMBL5407	1	ppb2_NN(MQN) + NB(ECfp4)
CHEMBL3959091	CHEMBL2147	2	ppb2_NN(MQN) + NB(ECfp4)
CHEMBL3959091	CHEMBL4523	3	ppb2_NN(MQN) + NB(ECfp4)
CHEMBL3959358	CHEMBL2835	2	ppb2_NN(MQN) + NB(ECfp4)
CHEMBL3959358	CHEMBL2971	8	ppb2_NN(MQN) + NB(ECfp4)
CHEMBL3959398	CHEMBL233	2	ppb2_NN(MQN) + NB(ECfp4)
CHEMBL3959433	CHEMBL2835	1	ppb2_NN(MQN) + NB(ECfp4)
CHEMBL3959581	CHEMBL5145	5	ppb2_NN(MQN) + NB(ECfp4)
CHEMBL3959770	CHEMBL2971	3	ppb2_NN(MQN) + NB(ECfp4)
CHEMBL3959770	CHEMBL2835	4	ppb2_NN(MQN) + NB(ECfp4)
CHEMBL3959909	CHEMBL2835	2	ppb2_NN(MQN) + NB(ECfp4)
CHEMBL3959909	CHEMBL2971	3	ppb2_NN(MQN) + NB(ECfp4)
CHEMBL3959924	CHEMBL2835	3	ppb2_NN(MQN) + NB(ECfp4)
CHEMBL3960213	CHEMBL2148	1	ppb2_NN(MQN) + NB(ECfp4)
CHEMBL3960213	CHEMBL2971	5	ppb2_NN(MQN) + NB(ECfp4)
CHEMBL3960416	CHEMBL2148	1	ppb2_NN(MQN) + NB(ECfp4)
CHEMBL3960416	CHEMBL2971	3	ppb2_NN(MQN) + NB(ECfp4)
CHEMBL3960554	CHEMBL5407	1	ppb2_NN(MQN) + NB(ECfp4)
CHEMBL3960554	CHEMBL4523	2	ppb2_NN(MQN) + NB(ECfp4)
CHEMBL3960554	CHEMBL2147	3	ppb2_NN(MQN) + NB(ECfp4)
CHEMBL3960785	CHEMBL217	1	ppb2_NN(MQN) + NB(ECfp4)
CHEMBL3960785	CHEMBL224	3	ppb2_NN(MQN) + NB(ECfp4)
CHEMBL3960785	CHEMBL234	4	ppb2_NN(MQN) + NB(ECfp4)
CHEMBL3961360	CHEMBL2147	1	ppb2_NN(MQN) + NB(ECfp4)
CHEMBL3961360	CHEMBL5407	3	ppb2_NN(MQN) + NB(ECfp4)
CHEMBL3961525	CHEMBL5407	1	ppb2_NN(MQN) + NB(ECfp4)
CHEMBL3961525	CHEMBL2147	3	ppb2_NN(MQN) + NB(ECfp4)
CHEMBL3961670	CHEMBL2971	2	ppb2_NN(MQN) + NB(ECfp4)
CHEMBL3961670	CHEMBL2835	3	ppb2_NN(MQN) + NB(ECfp4)
CHEMBL3961692	CHEMBL5407	1	ppb2_NN(MQN) + NB(ECfp4)
CHEMBL3961692	CHEMBL4523	2	ppb2_NN(MQN) + NB(ECfp4)
CHEMBL3961692	CHEMBL2147	3	ppb2_NN(MQN) + NB(ECfp4)
CHEMBL3961850	CHEMBL2148	1	ppb2_NN(MQN) + NB(ECfp4)
CHEMBL3961850	CHEMBL2971	2	ppb2_NN(MQN) + NB(ECfp4)
CHEMBL3962064	CHEMBL2147	1	ppb2_NN(MQN) + NB(ECfp4)
CHEMBL3962064	CHEMBL4523	2	ppb2_NN(MQN) + NB(ECfp4)
CHEMBL3962342	CHEMBL2835	1	ppb2_NN(MQN) + NB(ECfp4)
CHEMBL3962342	CHEMBL2971	4	ppb2_NN(MQN) + NB(ECfp4)
CHEMBL3962386	CHEMBL2835	1	ppb2_NN(MQN) + NB(ECfp4)
CHEMBL3962448	CHEMBL2148	2	ppb2_NN(MQN) + NB(ECfp4)
CHEMBL3962448	CHEMBL2971	3	ppb2_NN(MQN) + NB(ECfp4)
CHEMBL3962506	CHEMBL2835	1	ppb2_NN(MQN) + NB(ECfp4)
CHEMBL3962506	CHEMBL2971	9	ppb2_NN(MQN) + NB(ECfp4)
CHEMBL3962525	CHEMBL224	2	ppb2_NN(MQN) + NB(ECfp4)
CHEMBL3962525	CHEMBL234	4	ppb2_NN(MQN) + NB(ECfp4)
CHEMBL3963191	CHEMBL2835	2	ppb2_NN(MQN) + NB(ECfp4)
CHEMBL3963271	CHEMBL2835	1	ppb2_NN(MQN) + NB(ECfp4)
CHEMBL3963605	CHEMBL262	4	ppb2_NN(MQN) + NB(ECfp4)
CHEMBL3963946	CHEMBL5407	1	ppb2_NN(MQN) + NB(ECfp4)
CHEMBL3963946	CHEMBL2147	3	ppb2_NN(MQN) + NB(ECfp4)
CHEMBL3964598	CHEMBL233	2	ppb2_NN(MQN) + NB(ECfp4)
CHEMBL3964598	CHEMBL237	3	ppb2_NN(MQN) + NB(ECfp4)
CHEMBL3964801	CHEMBL2835	4	ppb2_NN(MQN) + NB(ECfp4)
CHEMBL3965069	CHEMBL1741195	1	ppb2_NN(MQN) + NB(ECfp4)
CHEMBL3965069	CHEMBL209	2	ppb2_NN(MQN) + NB(ECfp4)
CHEMBL3965297	CHEMBL2147	1	ppb2_NN(MQN) + NB(ECfp4)
CHEMBL3965297	CHEMBL4523	3	ppb2_NN(MQN) + NB(ECfp4)
CHEMBL3965713	CHEMBL2835	1	ppb2_NN(MQN) + NB(ECfp4)
CHEMBL3965713	CHEMBL2971	3	ppb2_NN(MQN) + NB(ECfp4)
CHEMBL3965741	CHEMBL5407	1	ppb2_NN(MQN) + NB(ECfp4)
CHEMBL3965741	CHEMBL2147	2	ppb2_NN(MQN) + NB(ECfp4)
CHEMBL3965757	CHEMBL2147	2	ppb2_NN(MQN) + NB(ECfp4)
CHEMBL3965757	CHEMBL4523	3	ppb2_NN(MQN) + NB(ECfp4)
CHEMBL3965946	CHEMBL2147	2	ppb2_NN(MQN) + NB(ECfp4)
CHEMBL3965946	CHEMBL4523	3	ppb2_NN(MQN) + NB(ECfp4)
CHEMBL3966363	CHEMBL2147	2	ppb2_NN(MQN) + NB(ECfp4)
CHEMBL3966696	CHEMBL5407	1	ppb2_NN(MQN) + NB(ECfp4)
CHEMBL3966696	CHEMBL2147	3	ppb2_NN(MQN) + NB(ECfp4)
CHEMBL3966732	CHEMBL2147	1	ppb2_NN(MQN) + NB(ECfp4)
CHEMBL3966732	CHEMBL4523	3	ppb2_NN(MQN) + NB(ECfp4)
CHEMBL3966806	CHEMBL4282	5	ppb2_NN(MQN) + NB(ECfp4)
CHEMBL3966830	CHEMBL233	1	ppb2_NN(MQN) + NB(ECfp4)
CHEMBL3966830	CHEMBL237	2	ppb2_NN(MQN) + NB(ECfp4)
CHEMBL3966842	CHEMBL217	1	ppb2_NN(MQN) + NB(ECfp4)
CHEMBL3966842	CHEMBL224	2	ppb2_NN(MQN) + NB(ECfp4)
CHEMBL3966842	CHEMBL234	7	ppb2_NN(MQN) + NB(ECfp4)
CHEMBL3967830	CHEMBL2835	6	ppb2_NN(MQN) + NB(ECfp4)
CHEMBL3967893	CHEMBL5145	1	ppb2_NN(MQN) + NB(ECfp4)
CHEMBL3968206	CHEMBL5407	1	ppb2_NN(MQN) + NB(ECfp4)
CHEMBL3968206	CHEMBL2147	3	ppb2_NN(MQN) + NB(ECfp4)
CHEMBL3968315	CHEMBL2835	2	ppb2_NN(MQN) + NB(ECfp4)
CHEMBL3968781	CHEMBL2835	1	ppb2_NN(MQN) + NB(ECfp4)
CHEMBL3968781	CHEMBL2971	8	ppb2_NN(MQN) + NB(ECfp4)
CHEMBL3968925	CHEMBL4005	1	ppb2_NN(MQN) + NB(ECfp4)
CHEMBL3968925	CHEMBL3267	3	ppb2_NN(MQN) + NB(ECfp4)
CHEMBL3969155	CHEMBL237	1	ppb2_NN(MQN) + NB(ECfp4)
CHEMBL3969155	CHEMBL233	2	ppb2_NN(MQN) + NB(ECfp4)
CHEMBL3969253	CHEMBL2971	8	ppb2_NN(MQN) + NB(ECfp4)
CHEMBL3970360	CHEMBL2835	7	ppb2_NN(MQN) + NB(ECfp4)
CHEMBL3970953	CHEMBL5407	1	ppb2_NN(MQN) + NB(ECfp4)
CHEMBL3970953	CHEMBL4523	2	ppb2_NN(MQN) + NB(ECfp4)
CHEMBL3970953	CHEMBL2147	3	ppb2_NN(MQN) + NB(ECfp4)
CHEMBL3970981	CHEMBL5407	1	ppb2_NN(MQN) + NB(ECfp4)
CHEMBL3970981	CHEMBL2147	3	ppb2_NN(MQN) + NB(ECfp4)
CHEMBL3971083	CHEMBL2835	1	ppb2_NN(MQN) + NB(ECfp4)
CHEMBL3971083	CHEMBL2971	6	ppb2_NN(MQN) + NB(ECfp4)
CHEMBL3971538	CHEMBL1945	1	ppb2_NN(MQN) + NB(ECfp4)
CHEMBL3971907	CHEMBL217	1	ppb2_NN(MQN) + NB(ECfp4)
CHEMBL3971907	CHEMBL224	2	ppb2_NN(MQN) + NB(ECfp4)
CHEMBL3971907	CHEMBL234	5	ppb2_NN(MQN) + NB(ECfp4)
CHEMBL3972050	CHEMBL5407	1	ppb2_NN(MQN) + NB(ECfp4)
CHEMBL3972050	CHEMBL2147	2	ppb2_NN(MQN) + NB(ECfp4)
CHEMBL3972453	CHEMBL2147	2	ppb2_NN(MQN) + NB(ECfp4)
CHEMBL3972830	CHEMBL2835	3	ppb2_NN(MQN) + NB(ECfp4)
CHEMBL3973487	CHEMBL234	2	ppb2_NN(MQN) + NB(ECfp4)
CHEMBL3973487	CHEMBL214	7	ppb2_NN(MQN) + NB(ECfp4)
CHEMBL3973544	CHEMBL5407	1	ppb2_NN(MQN) + NB(ECfp4)
CHEMBL3973547	CHEMBL2835	4	ppb2_NN(MQN) + NB(ECfp4)
CHEMBL3973848	CHEMBL2148	2	ppb2_NN(MQN) + NB(ECfp4)
CHEMBL3973848	CHEMBL2971	10	ppb2_NN(MQN) + NB(ECfp4)
CHEMBL3974543	CHEMBL2147	7	ppb2_NN(MQN) + NB(ECfp4)
CHEMBL3974543	CHEMBL4523	8	ppb2_NN(MQN) + NB(ECfp4)
CHEMBL3974857	CHEMBL237	1	ppb2_NN(MQN) + NB(ECfp4)
CHEMBL3974857	CHEMBL233	4	ppb2_NN(MQN) + NB(ECfp4)
CHEMBL3975046	CHEMBL2835	1	ppb2_NN(MQN) + NB(ECfp4)
CHEMBL3975198	CHEMBL5407	1	ppb2_NN(MQN) + NB(ECfp4)
CHEMBL3975198	CHEMBL2147	3	ppb2_NN(MQN) + NB(ECfp4)
CHEMBL3975506	CHEMBL2835	3	ppb2_NN(MQN) + NB(ECfp4)
CHEMBL3975756	CHEMBL5407	1	ppb2_NN(MQN) + NB(ECfp4)
CHEMBL3975756	CHEMBL2147	3	ppb2_NN(MQN) + NB(ECfp4)
CHEMBL3975764	CHEMBL5407	1	ppb2_NN(MQN) + NB(ECfp4)
CHEMBL3975764	CHEMBL2147	3	ppb2_NN(MQN) + NB(ECfp4)
CHEMBL3975787	CHEMBL2147	2	ppb2_NN(MQN) + NB(ECfp4)
CHEMBL3975787	CHEMBL5407	3	ppb2_NN(MQN) + NB(ECfp4)
CHEMBL3976267	CHEMBL5407	1	ppb2_NN(MQN) + NB(ECfp4)
CHEMBL3976267	CHEMBL4523	2	ppb2_NN(MQN) + NB(ECfp4)
CHEMBL3976267	CHEMBL2147	3	ppb2_NN(MQN) + NB(ECfp4)
CHEMBL3976282	CHEMBL217	1	ppb2_NN(MQN) + NB(ECfp4)
CHEMBL3976282	CHEMBL234	2	ppb2_NN(MQN) + NB(ECfp4)
CHEMBL3976282	CHEMBL224	3	ppb2_NN(MQN) + NB(ECfp4)
CHEMBL3977158	CHEMBL3629	1	ppb2_NN(MQN) + NB(ECfp4)
CHEMBL3977237	CHEMBL2971	2	ppb2_NN(MQN) + NB(ECfp4)
CHEMBL3977237	CHEMBL2835	3	ppb2_NN(MQN) + NB(ECfp4)
CHEMBL3977452	CHEMBL2148	2	ppb2_NN(MQN) + NB(ECfp4)
CHEMBL3977509	CHEMBL2148	1	ppb2_NN(MQN) + NB(ECfp4)
CHEMBL3977509	CHEMBL2971	2	ppb2_NN(MQN) + NB(ECfp4)
CHEMBL3979182	CHEMBL2147	1	ppb2_NN(MQN) + NB(ECfp4)
CHEMBL3980040	CHEMBL2147	2	ppb2_NN(MQN) + NB(ECfp4)
CHEMBL3980040	CHEMBL5407	3	ppb2_NN(MQN) + NB(ECfp4)
CHEMBL3980778	CHEMBL2835	1	ppb2_NN(MQN) + NB(ECfp4)
CHEMBL3980778	CHEMBL2148	2	ppb2_NN(MQN) + NB(ECfp4)
CHEMBL3980864	CHEMBL237	1	ppb2_NN(MQN) + NB(ECfp4)
CHEMBL3980864	CHEMBL233	2	ppb2_NN(MQN) + NB(ECfp4)
CHEMBL3981057	CHEMBL1945	1	ppb2_NN(MQN) + NB(ECfp4)
CHEMBL3981057	CHEMBL1946	6	ppb2_NN(MQN) + NB(ECfp4)
CHEMBL3982255	CHEMBL2148	2	ppb2_NN(MQN) + NB(ECfp4)
CHEMBL3982255	CHEMBL2971	3	ppb2_NN(MQN) + NB(ECfp4)
CHEMBL3982307	CHEMBL2148	1	ppb2_NN(MQN) + NB(ECfp4)
CHEMBL3982307	CHEMBL2971	3	ppb2_NN(MQN) + NB(ECfp4)
CHEMBL3982408	CHEMBL2835	3	ppb2_NN(MQN) + NB(ECfp4)
CHEMBL3982418	CHEMBL2722	1	ppb2_NN(MQN) + NB(ECfp4)
CHEMBL3982418	CHEMBL1908	2	ppb2_NN(MQN) + NB(ECfp4)
CHEMBL3982486	CHEMBL217	1	ppb2_NN(MQN) + NB(ECfp4)
CHEMBL3982486	CHEMBL224	2	ppb2_NN(MQN) + NB(ECfp4)
CHEMBL3982486	CHEMBL234	5	ppb2_NN(MQN) + NB(ECfp4)
CHEMBL3982486	CHEMBL214	9	ppb2_NN(MQN) + NB(ECfp4)
CHEMBL3982539	CHEMBL5407	1	ppb2_NN(MQN) + NB(ECfp4)
CHEMBL3982539	CHEMBL4523	2	ppb2_NN(MQN) + NB(ECfp4)
CHEMBL3982539	CHEMBL2147	3	ppb2_NN(MQN) + NB(ECfp4)
CHEMBL3983040	CHEMBL2835	3	ppb2_NN(MQN) + NB(ECfp4)
CHEMBL3983256	CHEMBL2835	1	ppb2_NN(MQN) + NB(ECfp4)
CHEMBL3983351	CHEMBL5407	1	ppb2_NN(MQN) + NB(ECfp4)
CHEMBL3983351	CHEMBL2147	2	ppb2_NN(MQN) + NB(ECfp4)
CHEMBL3983983	CHEMBL2835	2	ppb2_NN(MQN) + NB(ECfp4)
CHEMBL3983983	CHEMBL2971	8	ppb2_NN(MQN) + NB(ECfp4)
CHEMBL3984183	CHEMBL5407	2	ppb2_NN(MQN) + NB(ECfp4)
CHEMBL3984183	CHEMBL4523	3	ppb2_NN(MQN) + NB(ECfp4)
CHEMBL3984183	CHEMBL2147	4	ppb2_NN(MQN) + NB(ECfp4)
CHEMBL3984282	CHEMBL5145	4	ppb2_NN(MQN) + NB(ECfp4)
CHEMBL3984741	CHEMBL2835	4	ppb2_NN(MQN) + NB(ECfp4)
CHEMBL3984764	CHEMBL2148	1	ppb2_NN(MQN) + NB(ECfp4)
CHEMBL3984764	CHEMBL2971	2	ppb2_NN(MQN) + NB(ECfp4)
CHEMBL3984793	CHEMBL2148	1	ppb2_NN(MQN) + NB(ECfp4)
CHEMBL3984961	CHEMBL2147	2	ppb2_NN(MQN) + NB(ECfp4)

## Sheet: NN(MQN)
id	ChEMBL-ID	Rank	method
CHEMBL3218576	CHEMBL4005	2	ppb2_NN(MQN)
CHEMBL3884217	CHEMBL205	6	ppb2_NN(MQN)
CHEMBL3889835	CHEMBL233	4	ppb2_NN(MQN)
CHEMBL3889936	CHEMBL280	6	ppb2_NN(MQN)
CHEMBL3890156	CHEMBL1741195	1	ppb2_NN(MQN)
CHEMBL3890156	CHEMBL209	2	ppb2_NN(MQN)
CHEMBL3890530	CHEMBL4523	1	ppb2_NN(MQN)
CHEMBL3890953	CHEMBL2147	1	ppb2_NN(MQN)
CHEMBL3890953	CHEMBL5407	3	ppb2_NN(MQN)
CHEMBL3890962	CHEMBL3629	1	ppb2_NN(MQN)
CHEMBL3891137	CHEMBL2835	8	ppb2_NN(MQN)
CHEMBL3891172	CHEMBL2835	1	ppb2_NN(MQN)
CHEMBL3891228	CHEMBL1741195	1	ppb2_NN(MQN)
CHEMBL3891228	CHEMBL209	2	ppb2_NN(MQN)
CHEMBL3891851	CHEMBL2147	6	ppb2_NN(MQN)
CHEMBL3891851	CHEMBL4523	7	ppb2_NN(MQN)
CHEMBL3891851	CHEMBL5407	8	ppb2_NN(MQN)
CHEMBL3892509	CHEMBL2147	1	ppb2_NN(MQN)
CHEMBL3892509	CHEMBL5407	3	ppb2_NN(MQN)
CHEMBL3892526	CHEMBL2835	2	ppb2_NN(MQN)
CHEMBL3892536	CHEMBL2147	1	ppb2_NN(MQN)
CHEMBL3892536	CHEMBL5407	3	ppb2_NN(MQN)
CHEMBL3893327	CHEMBL2148	1	ppb2_NN(MQN)
CHEMBL3893643	CHEMBL237	1	ppb2_NN(MQN)
CHEMBL3893643	CHEMBL233	3	ppb2_NN(MQN)
CHEMBL3894557	CHEMBL233	2	ppb2_NN(MQN)
CHEMBL3894571	CHEMBL2292	1	ppb2_NN(MQN)
CHEMBL3894571	CHEMBL5543	2	ppb2_NN(MQN)
CHEMBL3895094	CHEMBL2147	1	ppb2_NN(MQN)
CHEMBL3895094	CHEMBL5407	3	ppb2_NN(MQN)
CHEMBL3895531	CHEMBL2147	3	ppb2_NN(MQN)
CHEMBL3895531	CHEMBL5407	5	ppb2_NN(MQN)
CHEMBL3895925	CHEMBL2835	1	ppb2_NN(MQN)
CHEMBL3896244	CHEMBL2147	1	ppb2_NN(MQN)
CHEMBL3896244	CHEMBL4523	2	ppb2_NN(MQN)
CHEMBL3896379	CHEMBL2971	2	ppb2_NN(MQN)
CHEMBL3896791	CHEMBL1741195	1	ppb2_NN(MQN)
CHEMBL3896791	CHEMBL209	2	ppb2_NN(MQN)
CHEMBL3896877	CHEMBL233	1	ppb2_NN(MQN)
CHEMBL3896877	CHEMBL237	2	ppb2_NN(MQN)
CHEMBL3897068	CHEMBL237	2	ppb2_NN(MQN)
CHEMBL3897068	CHEMBL233	3	ppb2_NN(MQN)
CHEMBL3897323	CHEMBL2147	1	ppb2_NN(MQN)
CHEMBL3897323	CHEMBL4523	2	ppb2_NN(MQN)
CHEMBL3897417	CHEMBL2971	9	ppb2_NN(MQN)
CHEMBL3897967	CHEMBL233	1	ppb2_NN(MQN)
CHEMBL3897967	CHEMBL237	2	ppb2_NN(MQN)
CHEMBL3899281	CHEMBL2835	1	ppb2_NN(MQN)
CHEMBL3899672	CHEMBL2148	10	ppb2_NN(MQN)
CHEMBL3899762	CHEMBL2835	5	ppb2_NN(MQN)
CHEMBL3900248	CHEMBL1741195	1	ppb2_NN(MQN)
CHEMBL3900248	CHEMBL209	2	ppb2_NN(MQN)
CHEMBL3900258	CHEMBL2147	6	ppb2_NN(MQN)
CHEMBL3900258	CHEMBL5407	8	ppb2_NN(MQN)
CHEMBL3900752	CHEMBL217	1	ppb2_NN(MQN)
CHEMBL3900795	CHEMBL2147	1	ppb2_NN(MQN)
CHEMBL3900795	CHEMBL4523	2	ppb2_NN(MQN)
CHEMBL3901124	CHEMBL2148	1	ppb2_NN(MQN)
CHEMBL3901124	CHEMBL2835	10	ppb2_NN(MQN)
CHEMBL3901134	CHEMBL2835	5	ppb2_NN(MQN)
CHEMBL3902417	CHEMBL2147	1	ppb2_NN(MQN)
CHEMBL3902417	CHEMBL5407	3	ppb2_NN(MQN)
CHEMBL3902542	CHEMBL2148	7	ppb2_NN(MQN)
CHEMBL3902579	CHEMBL2835	2	ppb2_NN(MQN)
CHEMBL3903218	CHEMBL2971	3	ppb2_NN(MQN)
CHEMBL3903272	CHEMBL4625	5	ppb2_NN(MQN)
CHEMBL3903272	CHEMBL4860	6	ppb2_NN(MQN)
CHEMBL3903560	CHEMBL234	7	ppb2_NN(MQN)
CHEMBL3903560	CHEMBL224	8	ppb2_NN(MQN)
CHEMBL3903777	CHEMBL1741195	1	ppb2_NN(MQN)
CHEMBL3903777	CHEMBL209	2	ppb2_NN(MQN)
CHEMBL3905194	CHEMBL2147	1	ppb2_NN(MQN)
CHEMBL3905194	CHEMBL4523	2	ppb2_NN(MQN)
CHEMBL3905247	CHEMBL217	2	ppb2_NN(MQN)
CHEMBL3905247	CHEMBL224	3	ppb2_NN(MQN)
CHEMBL3905247	CHEMBL234	9	ppb2_NN(MQN)
CHEMBL3906798	CHEMBL4523	1	ppb2_NN(MQN)
CHEMBL3906798	CHEMBL5407	2	ppb2_NN(MQN)
CHEMBL3906798	CHEMBL2147	3	ppb2_NN(MQN)
CHEMBL3906885	CHEMBL2148	1	ppb2_NN(MQN)
CHEMBL3906885	CHEMBL2971	2	ppb2_NN(MQN)
CHEMBL3907320	CHEMBL2147	1	ppb2_NN(MQN)
CHEMBL3907320	CHEMBL5407	10	ppb2_NN(MQN)
CHEMBL3907536	CHEMBL1741195	1	ppb2_NN(MQN)
CHEMBL3907536	CHEMBL209	2	ppb2_NN(MQN)
CHEMBL3909092	CHEMBL2971	5	ppb2_NN(MQN)
CHEMBL3909568	CHEMBL2835	2	ppb2_NN(MQN)
CHEMBL3909947	CHEMBL2147	1	ppb2_NN(MQN)
CHEMBL3909947	CHEMBL5407	3	ppb2_NN(MQN)
CHEMBL3911037	CHEMBL1945	1	ppb2_NN(MQN)
CHEMBL3911037	CHEMBL1946	2	ppb2_NN(MQN)
CHEMBL3913540	CHEMBL4523	1	ppb2_NN(MQN)
CHEMBL3913691	CHEMBL224	2	ppb2_NN(MQN)
CHEMBL3913691	CHEMBL234	3	ppb2_NN(MQN)
CHEMBL3914475	CHEMBL2148	1	ppb2_NN(MQN)
CHEMBL3914629	CHEMBL1741195	1	ppb2_NN(MQN)
CHEMBL3914629	CHEMBL209	2	ppb2_NN(MQN)
CHEMBL3915323	CHEMBL2147	1	ppb2_NN(MQN)
CHEMBL3915323	CHEMBL5407	3	ppb2_NN(MQN)
CHEMBL3915913	CHEMBL2147	1	ppb2_NN(MQN)
CHEMBL3915913	CHEMBL5407	3	ppb2_NN(MQN)
CHEMBL3916092	CHEMBL3629	1	ppb2_NN(MQN)
CHEMBL3916122	CHEMBL233	2	ppb2_NN(MQN)
CHEMBL3916122	CHEMBL237	4	ppb2_NN(MQN)
CHEMBL3916604	CHEMBL1741195	1	ppb2_NN(MQN)
CHEMBL3916604	CHEMBL209	2	ppb2_NN(MQN)
CHEMBL3916902	CHEMBL2147	3	ppb2_NN(MQN)
CHEMBL3916902	CHEMBL5407	5	ppb2_NN(MQN)
CHEMBL3916961	CHEMBL1908	7	ppb2_NN(MQN)
CHEMBL3916961	CHEMBL2722	9	ppb2_NN(MQN)
CHEMBL3917077	CHEMBL2147	9	ppb2_NN(MQN)
CHEMBL3917854	CHEMBL2971	5	ppb2_NN(MQN)
CHEMBL3917906	CHEMBL2835	1	ppb2_NN(MQN)
CHEMBL3917906	CHEMBL2148	2	ppb2_NN(MQN)
CHEMBL3917906	CHEMBL2971	7	ppb2_NN(MQN)
CHEMBL3918076	CHEMBL2147	3	ppb2_NN(MQN)
CHEMBL3918076	CHEMBL4523	4	ppb2_NN(MQN)
CHEMBL3918755	CHEMBL217	2	ppb2_NN(MQN)
CHEMBL3918755	CHEMBL234	3	ppb2_NN(MQN)
CHEMBL3919646	CHEMBL2147	1	ppb2_NN(MQN)
CHEMBL3919646	CHEMBL4523	2	ppb2_NN(MQN)
CHEMBL3919799	CHEMBL2148	3	ppb2_NN(MQN)
CHEMBL3919848	CHEMBL1741195	1	ppb2_NN(MQN)
CHEMBL3919848	CHEMBL209	2	ppb2_NN(MQN)
CHEMBL3920142	CHEMBL2835	8	ppb2_NN(MQN)
CHEMBL3920252	CHEMBL217	1	ppb2_NN(MQN)
CHEMBL3920252	CHEMBL224	5	ppb2_NN(MQN)
CHEMBL3920252	CHEMBL234	7	ppb2_NN(MQN)
CHEMBL3920292	CHEMBL2835	7	ppb2_NN(MQN)
CHEMBL3920418	CHEMBL2835	1	ppb2_NN(MQN)
CHEMBL3920484	CHEMBL2148	8	ppb2_NN(MQN)
CHEMBL3920484	CHEMBL2971	9	ppb2_NN(MQN)
CHEMBL3920627	CHEMBL1741195	1	ppb2_NN(MQN)
CHEMBL3920627	CHEMBL209	2	ppb2_NN(MQN)
CHEMBL3920681	CHEMBL2148	1	ppb2_NN(MQN)
CHEMBL3920824	CHEMBL2835	8	ppb2_NN(MQN)
CHEMBL3921976	CHEMBL2014	1	ppb2_NN(MQN)
CHEMBL3921976	CHEMBL233	3	ppb2_NN(MQN)
CHEMBL3923240	CHEMBL214	9	ppb2_NN(MQN)
CHEMBL3923240	CHEMBL224	10	ppb2_NN(MQN)
CHEMBL3925605	CHEMBL2148	7	ppb2_NN(MQN)
CHEMBL3925919	CHEMBL2835	8	ppb2_NN(MQN)
CHEMBL3925958	CHEMBL2835	4	ppb2_NN(MQN)
CHEMBL3926007	CHEMBL2147	1	ppb2_NN(MQN)
CHEMBL3926007	CHEMBL4523	2	ppb2_NN(MQN)
CHEMBL3926007	CHEMBL5407	3	ppb2_NN(MQN)
CHEMBL3926059	CHEMBL2148	1	ppb2_NN(MQN)
CHEMBL3926930	CHEMBL2148	1	ppb2_NN(MQN)
CHEMBL3926930	CHEMBL2971	2	ppb2_NN(MQN)
CHEMBL3927136	CHEMBL237	1	ppb2_NN(MQN)
CHEMBL3927136	CHEMBL233	4	ppb2_NN(MQN)
CHEMBL3927952	CHEMBL2147	9	ppb2_NN(MQN)
CHEMBL3927952	CHEMBL4523	10	ppb2_NN(MQN)
CHEMBL3929011	CHEMBL2147	1	ppb2_NN(MQN)
CHEMBL3929011	CHEMBL4523	2	ppb2_NN(MQN)
CHEMBL3929011	CHEMBL5407	3	ppb2_NN(MQN)
CHEMBL3929168	CHEMBL217	1	ppb2_NN(MQN)
CHEMBL3929168	CHEMBL224	2	ppb2_NN(MQN)
CHEMBL3929168	CHEMBL234	4	ppb2_NN(MQN)
CHEMBL3929264	CHEMBL2147	1	ppb2_NN(MQN)
CHEMBL3929264	CHEMBL5407	3	ppb2_NN(MQN)
CHEMBL3929573	CHEMBL2835	10	ppb2_NN(MQN)
CHEMBL3930290	CHEMBL2148	3	ppb2_NN(MQN)
CHEMBL3930290	CHEMBL2971	4	ppb2_NN(MQN)
CHEMBL3930305	CHEMBL2835	1	ppb2_NN(MQN)
CHEMBL3930620	CHEMBL203	3	ppb2_NN(MQN)
CHEMBL3930712	CHEMBL2148	1	ppb2_NN(MQN)
CHEMBL3931150	CHEMBL2835	1	ppb2_NN(MQN)
CHEMBL3931279	CHEMBL2147	1	ppb2_NN(MQN)
CHEMBL3931279	CHEMBL5407	3	ppb2_NN(MQN)
CHEMBL3932460	CHEMBL4523	2	ppb2_NN(MQN)
CHEMBL3934709	CHEMBL2835	2	ppb2_NN(MQN)
CHEMBL3935018	CHEMBL2147	7	ppb2_NN(MQN)
CHEMBL3935018	CHEMBL4523	8	ppb2_NN(MQN)
CHEMBL3935018	CHEMBL5407	9	ppb2_NN(MQN)
CHEMBL3935096	CHEMBL2147	1	ppb2_NN(MQN)
CHEMBL3935096	CHEMBL4523	2	ppb2_NN(MQN)
CHEMBL3935096	CHEMBL5407	3	ppb2_NN(MQN)
CHEMBL3935178	CHEMBL2835	1	ppb2_NN(MQN)
CHEMBL3936320	CHEMBL2147	3	ppb2_NN(MQN)
CHEMBL3936320	CHEMBL4523	4	ppb2_NN(MQN)
CHEMBL3936541	CHEMBL2835	2	ppb2_NN(MQN)
CHEMBL3937034	CHEMBL2147	1	ppb2_NN(MQN)
CHEMBL3937034	CHEMBL5407	3	ppb2_NN(MQN)
CHEMBL3937204	CHEMBL2148	1	ppb2_NN(MQN)
CHEMBL3937204	CHEMBL2971	2	ppb2_NN(MQN)
CHEMBL3937222	CHEMBL1741195	1	ppb2_NN(MQN)
CHEMBL3937222	CHEMBL209	2	ppb2_NN(MQN)
CHEMBL3937835	CHEMBL2148	1	ppb2_NN(MQN)
CHEMBL3937878	CHEMBL2971	9	ppb2_NN(MQN)
CHEMBL3938031	CHEMBL2835	4	ppb2_NN(MQN)
CHEMBL3938583	CHEMBL2147	1	ppb2_NN(MQN)
CHEMBL3938583	CHEMBL5407	3	ppb2_NN(MQN)
CHEMBL3938660	CHEMBL2835	7	ppb2_NN(MQN)
CHEMBL3939394	CHEMBL2147	3	ppb2_NN(MQN)
CHEMBL3939394	CHEMBL5407	5	ppb2_NN(MQN)
CHEMBL3939580	CHEMBL2148	1	ppb2_NN(MQN)
CHEMBL3939580	CHEMBL2835	2	ppb2_NN(MQN)
CHEMBL3940389	CHEMBL2147	4	ppb2_NN(MQN)
CHEMBL3940389	CHEMBL4523	5	ppb2_NN(MQN)
CHEMBL3940712	CHEMBL234	4	ppb2_NN(MQN)
CHEMBL3941202	CHEMBL2835	1	ppb2_NN(MQN)
CHEMBL3941211	CHEMBL2148	3	ppb2_NN(MQN)
CHEMBL3942446	CHEMBL2147	4	ppb2_NN(MQN)
CHEMBL3942446	CHEMBL5407	6	ppb2_NN(MQN)
CHEMBL3943096	CHEMBL1741195	1	ppb2_NN(MQN)
CHEMBL3943096	CHEMBL209	2	ppb2_NN(MQN)
CHEMBL3943759	CHEMBL2147	4	ppb2_NN(MQN)
CHEMBL3943759	CHEMBL5407	6	ppb2_NN(MQN)
CHEMBL3944062	CHEMBL2147	1	ppb2_NN(MQN)
CHEMBL3944062	CHEMBL4523	2	ppb2_NN(MQN)
CHEMBL3944062	CHEMBL5407	3	ppb2_NN(MQN)
CHEMBL3945832	CHEMBL2973	5	ppb2_NN(MQN)
CHEMBL3945832	CHEMBL3231	6	ppb2_NN(MQN)
CHEMBL3946306	CHEMBL2147	1	ppb2_NN(MQN)
CHEMBL3946306	CHEMBL5407	3	ppb2_NN(MQN)
CHEMBL3946970	CHEMBL2147	8	ppb2_NN(MQN)
CHEMBL3946970	CHEMBL4523	9	ppb2_NN(MQN)
CHEMBL3946970	CHEMBL5407	10	ppb2_NN(MQN)
CHEMBL3947292	CHEMBL2835	1	ppb2_NN(MQN)
CHEMBL3947309	CHEMBL2147	5	ppb2_NN(MQN)
CHEMBL3947309	CHEMBL5407	7	ppb2_NN(MQN)
CHEMBL3947540	CHEMBL2835	1	ppb2_NN(MQN)
CHEMBL3947770	CHEMBL2147	1	ppb2_NN(MQN)
CHEMBL3947770	CHEMBL5407	3	ppb2_NN(MQN)
CHEMBL3948056	CHEMBL217	1	ppb2_NN(MQN)
CHEMBL3948056	CHEMBL224	4	ppb2_NN(MQN)
CHEMBL3948713	CHEMBL233	3	ppb2_NN(MQN)
CHEMBL3948713	CHEMBL237	4	ppb2_NN(MQN)
CHEMBL3949274	CHEMBL2147	5	ppb2_NN(MQN)
CHEMBL3949274	CHEMBL4523	6	ppb2_NN(MQN)
CHEMBL3949274	CHEMBL5407	7	ppb2_NN(MQN)
CHEMBL3949310	CHEMBL2835	1	ppb2_NN(MQN)
CHEMBL3949394	CHEMBL2835	9	ppb2_NN(MQN)
CHEMBL3950143	CHEMBL2835	8	ppb2_NN(MQN)
CHEMBL3950269	CHEMBL2147	6	ppb2_NN(MQN)
CHEMBL3950269	CHEMBL5407	8	ppb2_NN(MQN)
CHEMBL3950981	CHEMBL2835	8	ppb2_NN(MQN)
CHEMBL3951001	CHEMBL1741195	1	ppb2_NN(MQN)
CHEMBL3951001	CHEMBL209	2	ppb2_NN(MQN)
CHEMBL3951088	CHEMBL2147	9	ppb2_NN(MQN)
CHEMBL3951198	CHEMBL1741195	1	ppb2_NN(MQN)
CHEMBL3951198	CHEMBL209	2	ppb2_NN(MQN)
CHEMBL3951786	CHEMBL2742	5	ppb2_NN(MQN)
CHEMBL3951786	CHEMBL3650	6	ppb2_NN(MQN)
CHEMBL3952022	CHEMBL2971	3	ppb2_NN(MQN)
CHEMBL3952022	CHEMBL2835	9	ppb2_NN(MQN)
CHEMBL3952360	CHEMBL2147	2	ppb2_NN(MQN)
CHEMBL3952360	CHEMBL5407	4	ppb2_NN(MQN)
CHEMBL3953164	CHEMBL2147	6	ppb2_NN(MQN)
CHEMBL3953164	CHEMBL4523	7	ppb2_NN(MQN)
CHEMBL3953164	CHEMBL5407	8	ppb2_NN(MQN)
CHEMBL3953482	CHEMBL2147	3	ppb2_NN(MQN)
CHEMBL3953482	CHEMBL5407	5	ppb2_NN(MQN)
CHEMBL3954782	CHEMBL233	1	ppb2_NN(MQN)
CHEMBL3954782	CHEMBL236	2	ppb2_NN(MQN)
CHEMBL3954782	CHEMBL237	3	ppb2_NN(MQN)
CHEMBL3955880	CHEMBL2147	8	ppb2_NN(MQN)
CHEMBL3955880	CHEMBL4523	10	ppb2_NN(MQN)
CHEMBL3956155	CHEMBL2147	8	ppb2_NN(MQN)
CHEMBL3956155	CHEMBL5407	10	ppb2_NN(MQN)
CHEMBL3956720	CHEMBL217	1	ppb2_NN(MQN)
CHEMBL3956720	CHEMBL234	4	ppb2_NN(MQN)
CHEMBL3956720	CHEMBL214	5	ppb2_NN(MQN)
CHEMBL3957997	CHEMBL2147	7	ppb2_NN(MQN)
CHEMBL3957997	CHEMBL5407	9	ppb2_NN(MQN)
CHEMBL3958253	CHEMBL2147	1	ppb2_NN(MQN)
CHEMBL3958253	CHEMBL5407	3	ppb2_NN(MQN)
CHEMBL3958785	CHEMBL2147	2	ppb2_NN(MQN)
CHEMBL3958785	CHEMBL5407	4	ppb2_NN(MQN)
CHEMBL3958969	CHEMBL280	3	ppb2_NN(MQN)
CHEMBL3958969	CHEMBL333	6	ppb2_NN(MQN)
CHEMBL3959005	CHEMBL2835	1	ppb2_NN(MQN)
CHEMBL3959091	CHEMBL2147	1	ppb2_NN(MQN)
CHEMBL3959091	CHEMBL4523	2	ppb2_NN(MQN)
CHEMBL3959091	CHEMBL5407	3	ppb2_NN(MQN)
CHEMBL3959398	CHEMBL233	2	ppb2_NN(MQN)
CHEMBL3959433	CHEMBL2835	1	ppb2_NN(MQN)
CHEMBL3960416	CHEMBL2148	3	ppb2_NN(MQN)
CHEMBL3960554	CHEMBL2147	1	ppb2_NN(MQN)
CHEMBL3960554	CHEMBL4523	2	ppb2_NN(MQN)
CHEMBL3960554	CHEMBL5407	3	ppb2_NN(MQN)
CHEMBL3960785	CHEMBL217	1	ppb2_NN(MQN)
CHEMBL3960785	CHEMBL224	4	ppb2_NN(MQN)
CHEMBL3960785	CHEMBL234	5	ppb2_NN(MQN)
CHEMBL3961525	CHEMBL2147	1	ppb2_NN(MQN)
CHEMBL3961525	CHEMBL5407	3	ppb2_NN(MQN)
CHEMBL3961670	CHEMBL2971	9	ppb2_NN(MQN)
CHEMBL3961692	CHEMBL2147	1	ppb2_NN(MQN)
CHEMBL3961692	CHEMBL4523	2	ppb2_NN(MQN)
CHEMBL3961692	CHEMBL5407	3	ppb2_NN(MQN)
CHEMBL3961850	CHEMBL2148	1	ppb2_NN(MQN)
CHEMBL3962386	CHEMBL2835	1	ppb2_NN(MQN)
CHEMBL3962506	CHEMBL2835	1	ppb2_NN(MQN)
CHEMBL3962525	CHEMBL234	4	ppb2_NN(MQN)
CHEMBL3962525	CHEMBL224	6	ppb2_NN(MQN)
CHEMBL3963946	CHEMBL2147	2	ppb2_NN(MQN)
CHEMBL3963946	CHEMBL5407	4	ppb2_NN(MQN)
CHEMBL3964598	CHEMBL233	1	ppb2_NN(MQN)
CHEMBL3964598	CHEMBL237	2	ppb2_NN(MQN)
CHEMBL3965297	CHEMBL2147	1	ppb2_NN(MQN)
CHEMBL3965297	CHEMBL4523	2	ppb2_NN(MQN)
CHEMBL3965448	CHEMBL2835	1	ppb2_NN(MQN)
CHEMBL3965713	CHEMBL2835	6	ppb2_NN(MQN)
CHEMBL3965713	CHEMBL2971	7	ppb2_NN(MQN)
CHEMBL3965757	CHEMBL2147	1	ppb2_NN(MQN)
CHEMBL3965757	CHEMBL4523	2	ppb2_NN(MQN)
CHEMBL3965946	CHEMBL2147	1	ppb2_NN(MQN)
CHEMBL3965946	CHEMBL4523	2	ppb2_NN(MQN)
CHEMBL3966696	CHEMBL2147	1	ppb2_NN(MQN)
CHEMBL3966696	CHEMBL5407	3	ppb2_NN(MQN)
CHEMBL3966732	CHEMBL2147	1	ppb2_NN(MQN)
CHEMBL3966732	CHEMBL4523	2	ppb2_NN(MQN)
CHEMBL3966830	CHEMBL233	1	ppb2_NN(MQN)
CHEMBL3966830	CHEMBL237	2	ppb2_NN(MQN)
CHEMBL3966842	CHEMBL217	3	ppb2_NN(MQN)
CHEMBL3966842	CHEMBL224	4	ppb2_NN(MQN)
CHEMBL3968206	CHEMBL2147	1	ppb2_NN(MQN)
CHEMBL3968206	CHEMBL5407	3	ppb2_NN(MQN)
CHEMBL3969155	CHEMBL233	1	ppb2_NN(MQN)
CHEMBL3969155	CHEMBL237	3	ppb2_NN(MQN)
CHEMBL3970953	CHEMBL2147	1	ppb2_NN(MQN)
CHEMBL3970953	CHEMBL4523	2	ppb2_NN(MQN)
CHEMBL3970953	CHEMBL5407	3	ppb2_NN(MQN)
CHEMBL3970981	CHEMBL2147	1	ppb2_NN(MQN)
CHEMBL3970981	CHEMBL5407	3	ppb2_NN(MQN)
CHEMBL3971083	CHEMBL2835	2	ppb2_NN(MQN)
CHEMBL3971538	CHEMBL1945	1	ppb2_NN(MQN)
CHEMBL3971538	CHEMBL1946	2	ppb2_NN(MQN)
CHEMBL3971907	CHEMBL217	2	ppb2_NN(MQN)
CHEMBL3971907	CHEMBL224	5	ppb2_NN(MQN)
CHEMBL3971907	CHEMBL234	8	ppb2_NN(MQN)
CHEMBL3973487	CHEMBL234	7	ppb2_NN(MQN)
CHEMBL3973544	CHEMBL2147	2	ppb2_NN(MQN)
CHEMBL3973544	CHEMBL5407	4	ppb2_NN(MQN)
CHEMBL3973848	CHEMBL2971	4	ppb2_NN(MQN)
CHEMBL3973848	CHEMBL2148	5	ppb2_NN(MQN)
CHEMBL3974857	CHEMBL237	1	ppb2_NN(MQN)
CHEMBL3974857	CHEMBL233	4	ppb2_NN(MQN)
CHEMBL3975046	CHEMBL2835	1	ppb2_NN(MQN)
CHEMBL3975198	CHEMBL2147	6	ppb2_NN(MQN)
CHEMBL3975198	CHEMBL5407	8	ppb2_NN(MQN)
CHEMBL3975787	CHEMBL2147	1	ppb2_NN(MQN)
CHEMBL3975787	CHEMBL5407	3	ppb2_NN(MQN)
CHEMBL3976267	CHEMBL2147	9	ppb2_NN(MQN)
CHEMBL3976267	CHEMBL4523	10	ppb2_NN(MQN)
CHEMBL3976282	CHEMBL217	7	ppb2_NN(MQN)
CHEMBL3977158	CHEMBL3629	1	ppb2_NN(MQN)
CHEMBL3977237	CHEMBL2835	5	ppb2_NN(MQN)
CHEMBL3977509	CHEMBL2148	1	ppb2_NN(MQN)
CHEMBL3980864	CHEMBL233	1	ppb2_NN(MQN)
CHEMBL3980864	CHEMBL237	2	ppb2_NN(MQN)
CHEMBL3981057	CHEMBL1945	1	ppb2_NN(MQN)
CHEMBL3981057	CHEMBL1946	2	ppb2_NN(MQN)
CHEMBL3982255	CHEMBL2148	1	ppb2_NN(MQN)
CHEMBL3982486	CHEMBL217	1	ppb2_NN(MQN)
CHEMBL3982486	CHEMBL234	5	ppb2_NN(MQN)
CHEMBL3982486	CHEMBL214	9	ppb2_NN(MQN)
CHEMBL3982486	CHEMBL224	10	ppb2_NN(MQN)
CHEMBL3982539	CHEMBL2147	9	ppb2_NN(MQN)
CHEMBL3982539	CHEMBL4523	10	ppb2_NN(MQN)
CHEMBL3983040	CHEMBL2835	5	ppb2_NN(MQN)
CHEMBL3983040	CHEMBL2971	6	ppb2_NN(MQN)
CHEMBL3983983	CHEMBL2835	3	ppb2_NN(MQN)
CHEMBL3984183	CHEMBL2147	1	ppb2_NN(MQN)
CHEMBL3984183	CHEMBL4523	2	ppb2_NN(MQN)
CHEMBL3984183	CHEMBL5407	3	ppb2_NN(MQN)
CHEMBL3984793	CHEMBL2971	4	ppb2_NN(MQN)

## Sheet: NN(Xfp)+NB(ECfp4)
id	ChEMBL-ID	Rank	method
CHEMBL3218576	CHEMBL4005	10	ppb2_NN(Xfp) + NB(ECfp4)
CHEMBL3883491	CHEMBL2326	7	ppb2_NN(Xfp) + NB(ECfp4)
CHEMBL3884217	CHEMBL205	3	ppb2_NN(Xfp) + NB(ECfp4)
CHEMBL3885230	CHEMBL205	3	ppb2_NN(Xfp) + NB(ECfp4)
CHEMBL3889835	CHEMBL233	3	ppb2_NN(Xfp) + NB(ECfp4)
CHEMBL3889835	CHEMBL2014	7	ppb2_NN(Xfp) + NB(ECfp4)
CHEMBL3889936	CHEMBL280	1	ppb2_NN(Xfp) + NB(ECfp4)
CHEMBL3889937	CHEMBL2835	2	ppb2_NN(Xfp) + NB(ECfp4)
CHEMBL3889937	CHEMBL2971	3	ppb2_NN(Xfp) + NB(ECfp4)
CHEMBL3890156	CHEMBL209	1	ppb2_NN(Xfp) + NB(ECfp4)
CHEMBL3890156	CHEMBL1741195	2	ppb2_NN(Xfp) + NB(ECfp4)
CHEMBL3890487	CHEMBL2835	1	ppb2_NN(Xfp) + NB(ECfp4)
CHEMBL3890530	CHEMBL4523	2	ppb2_NN(Xfp) + NB(ECfp4)
CHEMBL3890530	CHEMBL2147	3	ppb2_NN(Xfp) + NB(ECfp4)
CHEMBL3890745	CHEMBL5407	1	ppb2_NN(Xfp) + NB(ECfp4)
CHEMBL3890745	CHEMBL2147	3	ppb2_NN(Xfp) + NB(ECfp4)
CHEMBL3890953	CHEMBL5407	1	ppb2_NN(Xfp) + NB(ECfp4)
CHEMBL3890953	CHEMBL2147	3	ppb2_NN(Xfp) + NB(ECfp4)
CHEMBL3890962	CHEMBL3629	1	ppb2_NN(Xfp) + NB(ECfp4)
CHEMBL3891057	CHEMBL2835	5	ppb2_NN(Xfp) + NB(ECfp4)
CHEMBL3891137	CHEMBL2835	1	ppb2_NN(Xfp) + NB(ECfp4)
CHEMBL3891137	CHEMBL2971	7	ppb2_NN(Xfp) + NB(ECfp4)
CHEMBL3891172	CHEMBL2835	1	ppb2_NN(Xfp) + NB(ECfp4)
CHEMBL3891228	CHEMBL209	1	ppb2_NN(Xfp) + NB(ECfp4)
CHEMBL3891228	CHEMBL1741195	2	ppb2_NN(Xfp) + NB(ECfp4)
CHEMBL3891615	CHEMBL2835	1	ppb2_NN(Xfp) + NB(ECfp4)
CHEMBL3891615	CHEMBL2971	4	ppb2_NN(Xfp) + NB(ECfp4)
CHEMBL3891851	CHEMBL5407	2	ppb2_NN(Xfp) + NB(ECfp4)
CHEMBL3891851	CHEMBL4523	6	ppb2_NN(Xfp) + NB(ECfp4)
CHEMBL3891851	CHEMBL2147	8	ppb2_NN(Xfp) + NB(ECfp4)
CHEMBL3892509	CHEMBL5407	1	ppb2_NN(Xfp) + NB(ECfp4)
CHEMBL3892509	CHEMBL2147	3	ppb2_NN(Xfp) + NB(ECfp4)
CHEMBL3892526	CHEMBL2835	2	ppb2_NN(Xfp) + NB(ECfp4)
CHEMBL3892526	CHEMBL2971	3	ppb2_NN(Xfp) + NB(ECfp4)
CHEMBL3892536	CHEMBL5407	1	ppb2_NN(Xfp) + NB(ECfp4)
CHEMBL3892536	CHEMBL2147	3	ppb2_NN(Xfp) + NB(ECfp4)
CHEMBL3892885	CHEMBL5407	1	ppb2_NN(Xfp) + NB(ECfp4)
CHEMBL3892885	CHEMBL4523	2	ppb2_NN(Xfp) + NB(ECfp4)
CHEMBL3892885	CHEMBL2147	4	ppb2_NN(Xfp) + NB(ECfp4)
CHEMBL3893327	CHEMBL2148	1	ppb2_NN(Xfp) + NB(ECfp4)
CHEMBL3893327	CHEMBL2971	4	ppb2_NN(Xfp) + NB(ECfp4)
CHEMBL3893643	CHEMBL237	1	ppb2_NN(Xfp) + NB(ECfp4)
CHEMBL3893643	CHEMBL233	3	ppb2_NN(Xfp) + NB(ECfp4)
CHEMBL3893713	CHEMBL2835	2	ppb2_NN(Xfp) + NB(ECfp4)
CHEMBL3893713	CHEMBL2971	4	ppb2_NN(Xfp) + NB(ECfp4)
CHEMBL3894557	CHEMBL233	2	ppb2_NN(Xfp) + NB(ECfp4)
CHEMBL3894571	CHEMBL5543	1	ppb2_NN(Xfp) + NB(ECfp4)
CHEMBL3894571	CHEMBL2292	2	ppb2_NN(Xfp) + NB(ECfp4)
CHEMBL3894688	CHEMBL2971	1	ppb2_NN(Xfp) + NB(ECfp4)
CHEMBL3895094	CHEMBL5407	1	ppb2_NN(Xfp) + NB(ECfp4)
CHEMBL3895094	CHEMBL2147	2	ppb2_NN(Xfp) + NB(ECfp4)
CHEMBL3895124	CHEMBL2147	4	ppb2_NN(Xfp) + NB(ECfp4)
CHEMBL3895272	CHEMBL2835	1	ppb2_NN(Xfp) + NB(ECfp4)
CHEMBL3895531	CHEMBL5407	1	ppb2_NN(Xfp) + NB(ECfp4)
CHEMBL3895531	CHEMBL2147	3	ppb2_NN(Xfp) + NB(ECfp4)
CHEMBL3895540	CHEMBL217	2	ppb2_NN(Xfp) + NB(ECfp4)
CHEMBL3895540	CHEMBL234	7	ppb2_NN(Xfp) + NB(ECfp4)
CHEMBL3895925	CHEMBL2835	1	ppb2_NN(Xfp) + NB(ECfp4)
CHEMBL3896005	CHEMBL2835	2	ppb2_NN(Xfp) + NB(ECfp4)
CHEMBL3896005	CHEMBL2971	5	ppb2_NN(Xfp) + NB(ECfp4)
CHEMBL3896141	CHEMBL2835	5	ppb2_NN(Xfp) + NB(ECfp4)
CHEMBL3896244	CHEMBL2147	1	ppb2_NN(Xfp) + NB(ECfp4)
CHEMBL3896244	CHEMBL4523	3	ppb2_NN(Xfp) + NB(ECfp4)
CHEMBL3896312	CHEMBL5407	2	ppb2_NN(Xfp) + NB(ECfp4)
CHEMBL3896312	CHEMBL4523	3	ppb2_NN(Xfp) + NB(ECfp4)
CHEMBL3896312	CHEMBL2147	4	ppb2_NN(Xfp) + NB(ECfp4)
CHEMBL3896379	CHEMBL2835	1	ppb2_NN(Xfp) + NB(ECfp4)
CHEMBL3896379	CHEMBL2971	4	ppb2_NN(Xfp) + NB(ECfp4)
CHEMBL3896662	CHEMBL2835	2	ppb2_NN(Xfp) + NB(ECfp4)
CHEMBL3896759	CHEMBL2835	2	ppb2_NN(Xfp) + NB(ECfp4)
CHEMBL3896759	CHEMBL2971	3	ppb2_NN(Xfp) + NB(ECfp4)
CHEMBL3896782	CHEMBL2147	3	ppb2_NN(Xfp) + NB(ECfp4)
CHEMBL3896782	CHEMBL4523	7	ppb2_NN(Xfp) + NB(ECfp4)
CHEMBL3896791	CHEMBL209	1	ppb2_NN(Xfp) + NB(ECfp4)
CHEMBL3896791	CHEMBL1741195	2	ppb2_NN(Xfp) + NB(ECfp4)
CHEMBL3896877	CHEMBL233	1	ppb2_NN(Xfp) + NB(ECfp4)
CHEMBL3896877	CHEMBL237	2	ppb2_NN(Xfp) + NB(ECfp4)
CHEMBL3896937	CHEMBL217	2	ppb2_NN(Xfp) + NB(ECfp4)
CHEMBL3897068	CHEMBL237	1	ppb2_NN(Xfp) + NB(ECfp4)
CHEMBL3897108	CHEMBL1741195	1	ppb2_NN(Xfp) + NB(ECfp4)
CHEMBL3897108	CHEMBL209	2	ppb2_NN(Xfp) + NB(ECfp4)
CHEMBL3897112	CHEMBL2835	2	ppb2_NN(Xfp) + NB(ECfp4)
CHEMBL3897112	CHEMBL2971	3	ppb2_NN(Xfp) + NB(ECfp4)
CHEMBL3897323	CHEMBL4523	2	ppb2_NN(Xfp) + NB(ECfp4)
CHEMBL3897323	CHEMBL2147	3	ppb2_NN(Xfp) + NB(ECfp4)
CHEMBL3897417	CHEMBL2148	1	ppb2_NN(Xfp) + NB(ECfp4)
CHEMBL3897417	CHEMBL2835	8	ppb2_NN(Xfp) + NB(ECfp4)
CHEMBL3897912	CHEMBL5407	1	ppb2_NN(Xfp) + NB(ECfp4)
CHEMBL3897912	CHEMBL4523	3	ppb2_NN(Xfp) + NB(ECfp4)
CHEMBL3897912	CHEMBL2147	9	ppb2_NN(Xfp) + NB(ECfp4)
CHEMBL3897967	CHEMBL237	1	ppb2_NN(Xfp) + NB(ECfp4)
CHEMBL3897967	CHEMBL233	2	ppb2_NN(Xfp) + NB(ECfp4)
CHEMBL3897993	CHEMBL2835	2	ppb2_NN(Xfp) + NB(ECfp4)
CHEMBL3898231	CHEMBL2835	2	ppb2_NN(Xfp) + NB(ECfp4)
CHEMBL3898989	CHEMBL5407	2	ppb2_NN(Xfp) + NB(ECfp4)
CHEMBL3898989	CHEMBL2147	6	ppb2_NN(Xfp) + NB(ECfp4)
CHEMBL3899109	CHEMBL2835	1	ppb2_NN(Xfp) + NB(ECfp4)
CHEMBL3899109	CHEMBL2971	3	ppb2_NN(Xfp) + NB(ECfp4)
CHEMBL3899281	CHEMBL2835	1	ppb2_NN(Xfp) + NB(ECfp4)
CHEMBL3899281	CHEMBL2971	7	ppb2_NN(Xfp) + NB(ECfp4)
CHEMBL3899672	CHEMBL2148	1	ppb2_NN(Xfp) + NB(ECfp4)
CHEMBL3899672	CHEMBL2835	3	ppb2_NN(Xfp) + NB(ECfp4)
CHEMBL3899672	CHEMBL2971	7	ppb2_NN(Xfp) + NB(ECfp4)
CHEMBL3899762	CHEMBL2835	1	ppb2_NN(Xfp) + NB(ECfp4)
CHEMBL3900248	CHEMBL209	1	ppb2_NN(Xfp) + NB(ECfp4)
CHEMBL3900248	CHEMBL1741195	2	ppb2_NN(Xfp) + NB(ECfp4)
CHEMBL3900258	CHEMBL5407	2	ppb2_NN(Xfp) + NB(ECfp4)
CHEMBL3900425	CHEMBL4523	1	ppb2_NN(Xfp) + NB(ECfp4)
CHEMBL3900425	CHEMBL2147	2	ppb2_NN(Xfp) + NB(ECfp4)
CHEMBL3900425	CHEMBL5407	3	ppb2_NN(Xfp) + NB(ECfp4)
CHEMBL3900752	CHEMBL217	1	ppb2_NN(Xfp) + NB(ECfp4)
CHEMBL3900752	CHEMBL224	3	ppb2_NN(Xfp) + NB(ECfp4)
CHEMBL3900795	CHEMBL4523	2	ppb2_NN(Xfp) + NB(ECfp4)
CHEMBL3900795	CHEMBL2147	3	ppb2_NN(Xfp) + NB(ECfp4)
CHEMBL3901124	CHEMBL2148	1	ppb2_NN(Xfp) + NB(ECfp4)
CHEMBL3901124	CHEMBL2835	2	ppb2_NN(Xfp) + NB(ECfp4)
CHEMBL3901134	CHEMBL2971	1	ppb2_NN(Xfp) + NB(ECfp4)
CHEMBL3901481	CHEMBL5407	1	ppb2_NN(Xfp) + NB(ECfp4)
CHEMBL3901481	CHEMBL2147	2	ppb2_NN(Xfp) + NB(ECfp4)
CHEMBL3901497	CHEMBL2835	2	ppb2_NN(Xfp) + NB(ECfp4)
CHEMBL3901497	CHEMBL2971	3	ppb2_NN(Xfp) + NB(ECfp4)
CHEMBL3902417	CHEMBL2147	1	ppb2_NN(Xfp) + NB(ECfp4)
CHEMBL3902417	CHEMBL5407	3	ppb2_NN(Xfp) + NB(ECfp4)
CHEMBL3902542	CHEMBL2148	1	ppb2_NN(Xfp) + NB(ECfp4)
CHEMBL3902542	CHEMBL2971	6	ppb2_NN(Xfp) + NB(ECfp4)
CHEMBL3903272	CHEMBL4625	1	ppb2_NN(Xfp) + NB(ECfp4)
CHEMBL3903272	CHEMBL4860	2	ppb2_NN(Xfp) + NB(ECfp4)
CHEMBL3903274	CHEMBL5145	3	ppb2_NN(Xfp) + NB(ECfp4)
CHEMBL3903286	CHEMBL2971	7	ppb2_NN(Xfp) + NB(ECfp4)
CHEMBL3903560	CHEMBL224	2	ppb2_NN(Xfp) + NB(ECfp4)
CHEMBL3903686	CHEMBL2147	1	ppb2_NN(Xfp) + NB(ECfp4)
CHEMBL3903686	CHEMBL4523	2	ppb2_NN(Xfp) + NB(ECfp4)
CHEMBL3903720	CHEMBL2835	2	ppb2_NN(Xfp) + NB(ECfp4)
CHEMBL3903720	CHEMBL2971	7	ppb2_NN(Xfp) + NB(ECfp4)
CHEMBL3903777	CHEMBL209	1	ppb2_NN(Xfp) + NB(ECfp4)
CHEMBL3903777	CHEMBL1741195	2	ppb2_NN(Xfp) + NB(ECfp4)
CHEMBL3904335	CHEMBL2971	9	ppb2_NN(Xfp) + NB(ECfp4)
CHEMBL3904982	CHEMBL2835	1	ppb2_NN(Xfp) + NB(ECfp4)
CHEMBL3904982	CHEMBL2971	3	ppb2_NN(Xfp) + NB(ECfp4)
CHEMBL3905144	CHEMBL2147	4	ppb2_NN(Xfp) + NB(ECfp4)
CHEMBL3905150	CHEMBL2148	1	ppb2_NN(Xfp) + NB(ECfp4)
CHEMBL3905150	CHEMBL2835	2	ppb2_NN(Xfp) + NB(ECfp4)
CHEMBL3905194	CHEMBL4523	2	ppb2_NN(Xfp) + NB(ECfp4)
CHEMBL3905194	CHEMBL2147	3	ppb2_NN(Xfp) + NB(ECfp4)
CHEMBL3905247	CHEMBL217	1	ppb2_NN(Xfp) + NB(ECfp4)
CHEMBL3905247	CHEMBL224	4	ppb2_NN(Xfp) + NB(ECfp4)
CHEMBL3905247	CHEMBL234	5	ppb2_NN(Xfp) + NB(ECfp4)
CHEMBL3905788	CHEMBL2835	2	ppb2_NN(Xfp) + NB(ECfp4)
CHEMBL3905788	CHEMBL2971	3	ppb2_NN(Xfp) + NB(ECfp4)
CHEMBL3906087	CHEMBL2835	1	ppb2_NN(Xfp) + NB(ECfp4)
CHEMBL3906087	CHEMBL2971	4	ppb2_NN(Xfp) + NB(ECfp4)
CHEMBL3906168	CHEMBL2835	1	ppb2_NN(Xfp) + NB(ECfp4)
CHEMBL3906168	CHEMBL2971	3	ppb2_NN(Xfp) + NB(ECfp4)
CHEMBL3906421	CHEMBL5407	1	ppb2_NN(Xfp) + NB(ECfp4)
CHEMBL3906421	CHEMBL2147	3	ppb2_NN(Xfp) + NB(ECfp4)
CHEMBL3906798	CHEMBL5407	1	ppb2_NN(Xfp) + NB(ECfp4)
CHEMBL3906798	CHEMBL2147	2	ppb2_NN(Xfp) + NB(ECfp4)
CHEMBL3906798	CHEMBL4523	3	ppb2_NN(Xfp) + NB(ECfp4)
CHEMBL3906885	CHEMBL2148	1	ppb2_NN(Xfp) + NB(ECfp4)
CHEMBL3906885	CHEMBL2971	2	ppb2_NN(Xfp) + NB(ECfp4)
CHEMBL3907010	CHEMBL3105	1	ppb2_NN(Xfp) + NB(ECfp4)
CHEMBL3907015	CHEMBL5145	10	ppb2_NN(Xfp) + NB(ECfp4)
CHEMBL3907320	CHEMBL2147	1	ppb2_NN(Xfp) + NB(ECfp4)
CHEMBL3907536	CHEMBL209	1	ppb2_NN(Xfp) + NB(ECfp4)
CHEMBL3907536	CHEMBL1741195	2	ppb2_NN(Xfp) + NB(ECfp4)
CHEMBL3908233	CHEMBL2835	3	ppb2_NN(Xfp) + NB(ECfp4)
CHEMBL3908328	CHEMBL2835	2	ppb2_NN(Xfp) + NB(ECfp4)
CHEMBL3908409	CHEMBL2835	2	ppb2_NN(Xfp) + NB(ECfp4)
CHEMBL3908409	CHEMBL2971	8	ppb2_NN(Xfp) + NB(ECfp4)
CHEMBL3909091	CHEMBL2835	2	ppb2_NN(Xfp) + NB(ECfp4)
CHEMBL3909091	CHEMBL2971	3	ppb2_NN(Xfp) + NB(ECfp4)
CHEMBL3909280	CHEMBL4523	1	ppb2_NN(Xfp) + NB(ECfp4)
CHEMBL3909280	CHEMBL5407	2	ppb2_NN(Xfp) + NB(ECfp4)
CHEMBL3909280	CHEMBL2147	3	ppb2_NN(Xfp) + NB(ECfp4)
CHEMBL3909510	CHEMBL2835	2	ppb2_NN(Xfp) + NB(ECfp4)
CHEMBL3909568	CHEMBL2835	2	ppb2_NN(Xfp) + NB(ECfp4)
CHEMBL3909568	CHEMBL2971	3	ppb2_NN(Xfp) + NB(ECfp4)
CHEMBL3909947	CHEMBL5407	1	ppb2_NN(Xfp) + NB(ECfp4)
CHEMBL3910228	CHEMBL4822	1	ppb2_NN(Xfp) + NB(ECfp4)
CHEMBL3910228	CHEMBL2525	2	ppb2_NN(Xfp) + NB(ECfp4)
CHEMBL3911037	CHEMBL1945	1	ppb2_NN(Xfp) + NB(ECfp4)
CHEMBL3911037	CHEMBL1946	2	ppb2_NN(Xfp) + NB(ECfp4)
CHEMBL3911166	CHEMBL2835	1	ppb2_NN(Xfp) + NB(ECfp4)
CHEMBL3911942	CHEMBL2835	2	ppb2_NN(Xfp) + NB(ECfp4)
CHEMBL3911942	CHEMBL2971	3	ppb2_NN(Xfp) + NB(ECfp4)
CHEMBL3912892	CHEMBL2835	2	ppb2_NN(Xfp) + NB(ECfp4)
CHEMBL3912919	CHEMBL2835	3	ppb2_NN(Xfp) + NB(ECfp4)
CHEMBL3913540	CHEMBL4523	2	ppb2_NN(Xfp) + NB(ECfp4)
CHEMBL3913540	CHEMBL2147	3	ppb2_NN(Xfp) + NB(ECfp4)
CHEMBL3913691	CHEMBL224	3	ppb2_NN(Xfp) + NB(ECfp4)
CHEMBL3914377	CHEMBL2835	2	ppb2_NN(Xfp) + NB(ECfp4)
CHEMBL3914377	CHEMBL2971	3	ppb2_NN(Xfp) + NB(ECfp4)
CHEMBL3914475	CHEMBL2148	1	ppb2_NN(Xfp) + NB(ECfp4)
CHEMBL3914475	CHEMBL2835	2	ppb2_NN(Xfp) + NB(ECfp4)
CHEMBL3914541	CHEMBL2835	1	ppb2_NN(Xfp) + NB(ECfp4)
CHEMBL3914629	CHEMBL209	1	ppb2_NN(Xfp) + NB(ECfp4)
CHEMBL3914629	CHEMBL1741195	2	ppb2_NN(Xfp) + NB(ECfp4)
CHEMBL3914639	CHEMBL5407	2	ppb2_NN(Xfp) + NB(ECfp4)
CHEMBL3914639	CHEMBL4523	8	ppb2_NN(Xfp) + NB(ECfp4)
CHEMBL3915323	CHEMBL5407	2	ppb2_NN(Xfp) + NB(ECfp4)
CHEMBL3915913	CHEMBL5407	1	ppb2_NN(Xfp) + NB(ECfp4)
CHEMBL3915972	CHEMBL2835	1	ppb2_NN(Xfp) + NB(ECfp4)
CHEMBL3916092	CHEMBL3629	1	ppb2_NN(Xfp) + NB(ECfp4)
CHEMBL3916122	CHEMBL237	1	ppb2_NN(Xfp) + NB(ECfp4)
CHEMBL3916122	CHEMBL233	2	ppb2_NN(Xfp) + NB(ECfp4)
CHEMBL3916604	CHEMBL209	1	ppb2_NN(Xfp) + NB(ECfp4)
CHEMBL3916604	CHEMBL1741195	2	ppb2_NN(Xfp) + NB(ECfp4)
CHEMBL3916637	CHEMBL2835	1	ppb2_NN(Xfp) + NB(ECfp4)
CHEMBL3916637	CHEMBL2971	3	ppb2_NN(Xfp) + NB(ECfp4)
CHEMBL3916902	CHEMBL5407	1	ppb2_NN(Xfp) + NB(ECfp4)
CHEMBL3916902	CHEMBL2147	3	ppb2_NN(Xfp) + NB(ECfp4)
CHEMBL3916925	CHEMBL2835	2	ppb2_NN(Xfp) + NB(ECfp4)
CHEMBL3916961	CHEMBL2722	1	ppb2_NN(Xfp) + NB(ECfp4)
CHEMBL3916961	CHEMBL1908	2	ppb2_NN(Xfp) + NB(ECfp4)
CHEMBL3917077	CHEMBL5407	1	ppb2_NN(Xfp) + NB(ECfp4)
CHEMBL3917077	CHEMBL2147	3	ppb2_NN(Xfp) + NB(ECfp4)
CHEMBL3917854	CHEMBL2971	3	ppb2_NN(Xfp) + NB(ECfp4)
CHEMBL3917906	CHEMBL2148	1	ppb2_NN(Xfp) + NB(ECfp4)
CHEMBL3917906	CHEMBL2835	2	ppb2_NN(Xfp) + NB(ECfp4)
CHEMBL3918076	CHEMBL4523	2	ppb2_NN(Xfp) + NB(ECfp4)
CHEMBL3918076	CHEMBL2147	3	ppb2_NN(Xfp) + NB(ECfp4)
CHEMBL3918273	CHEMBL4523	9	ppb2_NN(Xfp) + NB(ECfp4)
CHEMBL3918538	CHEMBL2835	1	ppb2_NN(Xfp) + NB(ECfp4)
CHEMBL3918538	CHEMBL2971	3	ppb2_NN(Xfp) + NB(ECfp4)
CHEMBL3918755	CHEMBL217	2	ppb2_NN(Xfp) + NB(ECfp4)
CHEMBL3918755	CHEMBL234	5	ppb2_NN(Xfp) + NB(ECfp4)
CHEMBL3919205	CHEMBL5145	5	ppb2_NN(Xfp) + NB(ECfp4)
CHEMBL3919646	CHEMBL4523	2	ppb2_NN(Xfp) + NB(ECfp4)
CHEMBL3919646	CHEMBL2147	3	ppb2_NN(Xfp) + NB(ECfp4)
CHEMBL3919799	CHEMBL2148	1	ppb2_NN(Xfp) + NB(ECfp4)
CHEMBL3919848	CHEMBL209	1	ppb2_NN(Xfp) + NB(ECfp4)
CHEMBL3919848	CHEMBL1741195	2	ppb2_NN(Xfp) + NB(ECfp4)
CHEMBL3920252	CHEMBL217	1	ppb2_NN(Xfp) + NB(ECfp4)
CHEMBL3920252	CHEMBL224	3	ppb2_NN(Xfp) + NB(ECfp4)
CHEMBL3920252	CHEMBL234	5	ppb2_NN(Xfp) + NB(ECfp4)
CHEMBL3920292	CHEMBL2835	1	ppb2_NN(Xfp) + NB(ECfp4)
CHEMBL3920292	CHEMBL2971	3	ppb2_NN(Xfp) + NB(ECfp4)
CHEMBL3920418	CHEMBL2835	1	ppb2_NN(Xfp) + NB(ECfp4)
CHEMBL3920418	CHEMBL2971	3	ppb2_NN(Xfp) + NB(ECfp4)
CHEMBL3920484	CHEMBL2148	1	ppb2_NN(Xfp) + NB(ECfp4)
CHEMBL3920484	CHEMBL2971	5	ppb2_NN(Xfp) + NB(ECfp4)
CHEMBL3920517	CHEMBL3920	8	ppb2_NN(Xfp) + NB(ECfp4)
CHEMBL3920581	CHEMBL2148	1	ppb2_NN(Xfp) + NB(ECfp4)
CHEMBL3920581	CHEMBL2971	4	ppb2_NN(Xfp) + NB(ECfp4)
CHEMBL3920627	CHEMBL209	1	ppb2_NN(Xfp) + NB(ECfp4)
CHEMBL3920627	CHEMBL1741195	2	ppb2_NN(Xfp) + NB(ECfp4)
CHEMBL3920681	CHEMBL2148	1	ppb2_NN(Xfp) + NB(ECfp4)
CHEMBL3920681	CHEMBL2835	2	ppb2_NN(Xfp) + NB(ECfp4)
CHEMBL3920824	CHEMBL2835	1	ppb2_NN(Xfp) + NB(ECfp4)
CHEMBL3920824	CHEMBL2971	5	ppb2_NN(Xfp) + NB(ECfp4)
CHEMBL3921320	CHEMBL2148	1	ppb2_NN(Xfp) + NB(ECfp4)
CHEMBL3921320	CHEMBL2971	8	ppb2_NN(Xfp) + NB(ECfp4)
CHEMBL3921976	CHEMBL233	1	ppb2_NN(Xfp) + NB(ECfp4)
CHEMBL3921976	CHEMBL2014	2	ppb2_NN(Xfp) + NB(ECfp4)
CHEMBL3922069	CHEMBL2835	1	ppb2_NN(Xfp) + NB(ECfp4)
CHEMBL3922069	CHEMBL2971	4	ppb2_NN(Xfp) + NB(ECfp4)
CHEMBL3923240	CHEMBL224	3	ppb2_NN(Xfp) + NB(ECfp4)
CHEMBL3923240	CHEMBL214	8	ppb2_NN(Xfp) + NB(ECfp4)
CHEMBL3924226	CHEMBL2835	1	ppb2_NN(Xfp) + NB(ECfp4)
CHEMBL3924226	CHEMBL2971	4	ppb2_NN(Xfp) + NB(ECfp4)
CHEMBL3924451	CHEMBL2835	2	ppb2_NN(Xfp) + NB(ECfp4)
CHEMBL3924903	CHEMBL5407	1	ppb2_NN(Xfp) + NB(ECfp4)
CHEMBL3924903	CHEMBL4523	2	ppb2_NN(Xfp) + NB(ECfp4)
CHEMBL3925403	CHEMBL2147	1	ppb2_NN(Xfp) + NB(ECfp4)
CHEMBL3925403	CHEMBL5407	3	ppb2_NN(Xfp) + NB(ECfp4)
CHEMBL3925605	CHEMBL2148	1	ppb2_NN(Xfp) + NB(ECfp4)
CHEMBL3925605	CHEMBL2971	5	ppb2_NN(Xfp) + NB(ECfp4)
CHEMBL3925919	CHEMBL2835	2	ppb2_NN(Xfp) + NB(ECfp4)
CHEMBL3925919	CHEMBL2971	4	ppb2_NN(Xfp) + NB(ECfp4)
CHEMBL3925958	CHEMBL2835	2	ppb2_NN(Xfp) + NB(ECfp4)
CHEMBL3925958	CHEMBL2971	3	ppb2_NN(Xfp) + NB(ECfp4)
CHEMBL3926007	CHEMBL5407	1	ppb2_NN(Xfp) + NB(ECfp4)
CHEMBL3926007	CHEMBL4523	3	ppb2_NN(Xfp) + NB(ECfp4)
CHEMBL3926007	CHEMBL2147	4	ppb2_NN(Xfp) + NB(ECfp4)
CHEMBL3926009	CHEMBL2835	2	ppb2_NN(Xfp) + NB(ECfp4)
CHEMBL3926009	CHEMBL2971	3	ppb2_NN(Xfp) + NB(ECfp4)
CHEMBL3926059	CHEMBL2148	1	ppb2_NN(Xfp) + NB(ECfp4)
CHEMBL3926059	CHEMBL2971	4	ppb2_NN(Xfp) + NB(ECfp4)
CHEMBL3926308	CHEMBL2835	2	ppb2_NN(Xfp) + NB(ECfp4)
CHEMBL3926930	CHEMBL2148	1	ppb2_NN(Xfp) + NB(ECfp4)
CHEMBL3926930	CHEMBL2971	4	ppb2_NN(Xfp) + NB(ECfp4)
CHEMBL3927136	CHEMBL237	1	ppb2_NN(Xfp) + NB(ECfp4)
CHEMBL3927136	CHEMBL233	2	ppb2_NN(Xfp) + NB(ECfp4)
CHEMBL3927952	CHEMBL5407	1	ppb2_NN(Xfp) + NB(ECfp4)
CHEMBL3927952	CHEMBL4523	4	ppb2_NN(Xfp) + NB(ECfp4)
CHEMBL3928129	CHEMBL2835	2	ppb2_NN(Xfp) + NB(ECfp4)
CHEMBL3928249	CHEMBL2835	2	ppb2_NN(Xfp) + NB(ECfp4)
CHEMBL3929011	CHEMBL5407	1	ppb2_NN(Xfp) + NB(ECfp4)
CHEMBL3929011	CHEMBL4523	2	ppb2_NN(Xfp) + NB(ECfp4)
CHEMBL3929011	CHEMBL2147	3	ppb2_NN(Xfp) + NB(ECfp4)
CHEMBL3929168	CHEMBL217	1	ppb2_NN(Xfp) + NB(ECfp4)
CHEMBL3929168	CHEMBL224	2	ppb2_NN(Xfp) + NB(ECfp4)
CHEMBL3929168	CHEMBL234	5	ppb2_NN(Xfp) + NB(ECfp4)
CHEMBL3929264	CHEMBL5407	1	ppb2_NN(Xfp) + NB(ECfp4)
CHEMBL3929264	CHEMBL2147	3	ppb2_NN(Xfp) + NB(ECfp4)
CHEMBL3929534	CHEMBL1741195	1	ppb2_NN(Xfp) + NB(ECfp4)
CHEMBL3929534	CHEMBL209	2	ppb2_NN(Xfp) + NB(ECfp4)
CHEMBL3929573	CHEMBL2835	3	ppb2_NN(Xfp) + NB(ECfp4)
CHEMBL3929734	CHEMBL2835	2	ppb2_NN(Xfp) + NB(ECfp4)
CHEMBL3929734	CHEMBL2971	3	ppb2_NN(Xfp) + NB(ECfp4)
CHEMBL3930290	CHEMBL2148	1	ppb2_NN(Xfp) + NB(ECfp4)
CHEMBL3930290	CHEMBL2971	8	ppb2_NN(Xfp) + NB(ECfp4)
CHEMBL3930305	CHEMBL2835	2	ppb2_NN(Xfp) + NB(ECfp4)
CHEMBL3930515	CHEMBL2722	1	ppb2_NN(Xfp) + NB(ECfp4)
CHEMBL3930515	CHEMBL1908	2	ppb2_NN(Xfp) + NB(ECfp4)
CHEMBL3930620	CHEMBL325	4	ppb2_NN(Xfp) + NB(ECfp4)
CHEMBL3930712	CHEMBL2148	1	ppb2_NN(Xfp) + NB(ECfp4)
CHEMBL3930712	CHEMBL2835	5	ppb2_NN(Xfp) + NB(ECfp4)
CHEMBL3931150	CHEMBL2835	1	ppb2_NN(Xfp) + NB(ECfp4)
CHEMBL3931278	CHEMBL2835	1	ppb2_NN(Xfp) + NB(ECfp4)
CHEMBL3931278	CHEMBL2971	3	ppb2_NN(Xfp) + NB(ECfp4)
CHEMBL3931279	CHEMBL5407	1	ppb2_NN(Xfp) + NB(ECfp4)
CHEMBL3931279	CHEMBL2147	3	ppb2_NN(Xfp) + NB(ECfp4)
CHEMBL3931819	CHEMBL2835	2	ppb2_NN(Xfp) + NB(ECfp4)
CHEMBL3932186	CHEMBL224	4	ppb2_NN(Xfp) + NB(ECfp4)
CHEMBL3932460	CHEMBL2147	1	ppb2_NN(Xfp) + NB(ECfp4)
CHEMBL3932460	CHEMBL4523	2	ppb2_NN(Xfp) + NB(ECfp4)
CHEMBL3932623	CHEMBL2835	2	ppb2_NN(Xfp) + NB(ECfp4)
CHEMBL3932623	CHEMBL2971	4	ppb2_NN(Xfp) + NB(ECfp4)
CHEMBL3933766	CHEMBL2835	2	ppb2_NN(Xfp) + NB(ECfp4)
CHEMBL3933766	CHEMBL2971	3	ppb2_NN(Xfp) + NB(ECfp4)
CHEMBL3933868	CHEMBL5407	2	ppb2_NN(Xfp) + NB(ECfp4)
CHEMBL3933868	CHEMBL2147	3	ppb2_NN(Xfp) + NB(ECfp4)
CHEMBL3934335	CHEMBL2971	1	ppb2_NN(Xfp) + NB(ECfp4)
CHEMBL3934335	CHEMBL2835	4	ppb2_NN(Xfp) + NB(ECfp4)
CHEMBL3934383	CHEMBL5407	1	ppb2_NN(Xfp) + NB(ECfp4)
CHEMBL3934383	CHEMBL2147	2	ppb2_NN(Xfp) + NB(ECfp4)
CHEMBL3934383	CHEMBL4523	3	ppb2_NN(Xfp) + NB(ECfp4)
CHEMBL3934942	CHEMBL2148	1	ppb2_NN(Xfp) + NB(ECfp4)
CHEMBL3934942	CHEMBL2971	8	ppb2_NN(Xfp) + NB(ECfp4)
CHEMBL3934963	CHEMBL2835	2	ppb2_NN(Xfp) + NB(ECfp4)
CHEMBL3934963	CHEMBL2971	4	ppb2_NN(Xfp) + NB(ECfp4)
CHEMBL3935018	CHEMBL5407	2	ppb2_NN(Xfp) + NB(ECfp4)
CHEMBL3935018	CHEMBL4523	4	ppb2_NN(Xfp) + NB(ECfp4)
CHEMBL3935096	CHEMBL5407	2	ppb2_NN(Xfp) + NB(ECfp4)
CHEMBL3935096	CHEMBL4523	3	ppb2_NN(Xfp) + NB(ECfp4)
CHEMBL3935096	CHEMBL2147	4	ppb2_NN(Xfp) + NB(ECfp4)
CHEMBL3935178	CHEMBL2835	1	ppb2_NN(Xfp) + NB(ECfp4)
CHEMBL3935396	CHEMBL2835	2	ppb2_NN(Xfp) + NB(ECfp4)
CHEMBL3935396	CHEMBL2971	3	ppb2_NN(Xfp) + NB(ECfp4)
CHEMBL3936320	CHEMBL4523	2	ppb2_NN(Xfp) + NB(ECfp4)
CHEMBL3936320	CHEMBL2147	3	ppb2_NN(Xfp) + NB(ECfp4)
CHEMBL3936541	CHEMBL2835	2	ppb2_NN(Xfp) + NB(ECfp4)
CHEMBL3936541	CHEMBL2971	3	ppb2_NN(Xfp) + NB(ECfp4)
CHEMBL3936990	CHEMBL4282	1	ppb2_NN(Xfp) + NB(ECfp4)
CHEMBL3936992	CHEMBL2147	1	ppb2_NN(Xfp) + NB(ECfp4)
CHEMBL3936992	CHEMBL4523	3	ppb2_NN(Xfp) + NB(ECfp4)
CHEMBL3937034	CHEMBL5407	1	ppb2_NN(Xfp) + NB(ECfp4)
CHEMBL3937034	CHEMBL2147	3	ppb2_NN(Xfp) + NB(ECfp4)
CHEMBL3937195	CHEMBL2835	2	ppb2_NN(Xfp) + NB(ECfp4)
CHEMBL3937204	CHEMBL2148	1	ppb2_NN(Xfp) + NB(ECfp4)
CHEMBL3937204	CHEMBL2971	3	ppb2_NN(Xfp) + NB(ECfp4)
CHEMBL3937222	CHEMBL209	1	ppb2_NN(Xfp) + NB(ECfp4)
CHEMBL3937222	CHEMBL1741195	2	ppb2_NN(Xfp) + NB(ECfp4)
CHEMBL3937835	CHEMBL2148	1	ppb2_NN(Xfp) + NB(ECfp4)
CHEMBL3937835	CHEMBL2971	2	ppb2_NN(Xfp) + NB(ECfp4)
CHEMBL3937835	CHEMBL2835	4	ppb2_NN(Xfp) + NB(ECfp4)
CHEMBL3937878	CHEMBL2971	1	ppb2_NN(Xfp) + NB(ECfp4)
CHEMBL3937898	CHEMBL2835	1	ppb2_NN(Xfp) + NB(ECfp4)
CHEMBL3937898	CHEMBL2971	3	ppb2_NN(Xfp) + NB(ECfp4)
CHEMBL3937927	CHEMBL2835	2	ppb2_NN(Xfp) + NB(ECfp4)
CHEMBL3938210	CHEMBL217	1	ppb2_NN(Xfp) + NB(ECfp4)
CHEMBL3938210	CHEMBL224	4	ppb2_NN(Xfp) + NB(ECfp4)
CHEMBL3938210	CHEMBL234	5	ppb2_NN(Xfp) + NB(ECfp4)
CHEMBL3938583	CHEMBL5407	1	ppb2_NN(Xfp) + NB(ECfp4)
CHEMBL3938583	CHEMBL2147	3	ppb2_NN(Xfp) + NB(ECfp4)
CHEMBL3938660	CHEMBL2835	2	ppb2_NN(Xfp) + NB(ECfp4)
CHEMBL3938660	CHEMBL2971	3	ppb2_NN(Xfp) + NB(ECfp4)
CHEMBL3939101	CHEMBL5407	1	ppb2_NN(Xfp) + NB(ECfp4)
CHEMBL3939101	CHEMBL2147	3	ppb2_NN(Xfp) + NB(ECfp4)
CHEMBL3939394	CHEMBL5407	1	ppb2_NN(Xfp) + NB(ECfp4)
CHEMBL3939394	CHEMBL2147	3	ppb2_NN(Xfp) + NB(ECfp4)
CHEMBL3939580	CHEMBL2835	1	ppb2_NN(Xfp) + NB(ECfp4)
CHEMBL3939580	CHEMBL2148	2	ppb2_NN(Xfp) + NB(ECfp4)
CHEMBL3939892	CHEMBL2835	3	ppb2_NN(Xfp) + NB(ECfp4)
CHEMBL3940227	CHEMBL2147	2	ppb2_NN(Xfp) + NB(ECfp4)
CHEMBL3940227	CHEMBL5407	3	ppb2_NN(Xfp) + NB(ECfp4)
CHEMBL3940389	CHEMBL2147	1	ppb2_NN(Xfp) + NB(ECfp4)
CHEMBL3940389	CHEMBL4523	2	ppb2_NN(Xfp) + NB(ECfp4)
CHEMBL3940712	CHEMBL224	3	ppb2_NN(Xfp) + NB(ECfp4)
CHEMBL3940744	CHEMBL5407	1	ppb2_NN(Xfp) + NB(ECfp4)
CHEMBL3941202	CHEMBL2835	1	ppb2_NN(Xfp) + NB(ECfp4)
CHEMBL3941202	CHEMBL2971	4	ppb2_NN(Xfp) + NB(ECfp4)
CHEMBL3941211	CHEMBL2148	1	ppb2_NN(Xfp) + NB(ECfp4)
CHEMBL3941211	CHEMBL2971	5	ppb2_NN(Xfp) + NB(ECfp4)
CHEMBL3942104	CHEMBL5407	1	ppb2_NN(Xfp) + NB(ECfp4)
CHEMBL3942104	CHEMBL2147	2	ppb2_NN(Xfp) + NB(ECfp4)
CHEMBL3942446	CHEMBL5407	1	ppb2_NN(Xfp) + NB(ECfp4)
CHEMBL3942446	CHEMBL2147	3	ppb2_NN(Xfp) + NB(ECfp4)
CHEMBL3942542	CHEMBL2835	1	ppb2_NN(Xfp) + NB(ECfp4)
CHEMBL3942542	CHEMBL2971	4	ppb2_NN(Xfp) + NB(ECfp4)
CHEMBL3943096	CHEMBL1741195	1	ppb2_NN(Xfp) + NB(ECfp4)
CHEMBL3943096	CHEMBL209	2	ppb2_NN(Xfp) + NB(ECfp4)
CHEMBL3943572	CHEMBL2971	2	ppb2_NN(Xfp) + NB(ECfp4)
CHEMBL3943572	CHEMBL2835	5	ppb2_NN(Xfp) + NB(ECfp4)
CHEMBL3943705	CHEMBL5407	1	ppb2_NN(Xfp) + NB(ECfp4)
CHEMBL3943705	CHEMBL4523	2	ppb2_NN(Xfp) + NB(ECfp4)
CHEMBL3943705	CHEMBL2147	3	ppb2_NN(Xfp) + NB(ECfp4)
CHEMBL3943759	CHEMBL5407	1	ppb2_NN(Xfp) + NB(ECfp4)
CHEMBL3943759	CHEMBL2147	5	ppb2_NN(Xfp) + NB(ECfp4)
CHEMBL3944062	CHEMBL5407	1	ppb2_NN(Xfp) + NB(ECfp4)
CHEMBL3944062	CHEMBL4523	2	ppb2_NN(Xfp) + NB(ECfp4)
CHEMBL3944062	CHEMBL2147	3	ppb2_NN(Xfp) + NB(ECfp4)
CHEMBL3945832	CHEMBL3231	1	ppb2_NN(Xfp) + NB(ECfp4)
CHEMBL3945832	CHEMBL2973	5	ppb2_NN(Xfp) + NB(ECfp4)
CHEMBL3946306	CHEMBL5407	1	ppb2_NN(Xfp) + NB(ECfp4)
CHEMBL3946306	CHEMBL2147	3	ppb2_NN(Xfp) + NB(ECfp4)
CHEMBL3946970	CHEMBL5407	1	ppb2_NN(Xfp) + NB(ECfp4)
CHEMBL3946970	CHEMBL4523	2	ppb2_NN(Xfp) + NB(ECfp4)
CHEMBL3946970	CHEMBL2147	3	ppb2_NN(Xfp) + NB(ECfp4)
CHEMBL3946995	CHEMBL224	2	ppb2_NN(Xfp) + NB(ECfp4)
CHEMBL3947213	CHEMBL2147	5	ppb2_NN(Xfp) + NB(ECfp4)
CHEMBL3947292	CHEMBL2835	1	ppb2_NN(Xfp) + NB(ECfp4)
CHEMBL3947309	CHEMBL5407	1	ppb2_NN(Xfp) + NB(ECfp4)
CHEMBL3947309	CHEMBL2147	3	ppb2_NN(Xfp) + NB(ECfp4)
CHEMBL3947456	CHEMBL2835	2	ppb2_NN(Xfp) + NB(ECfp4)
CHEMBL3947456	CHEMBL2971	3	ppb2_NN(Xfp) + NB(ECfp4)
CHEMBL3947484	CHEMBL5407	1	ppb2_NN(Xfp) + NB(ECfp4)
CHEMBL3947484	CHEMBL2147	2	ppb2_NN(Xfp) + NB(ECfp4)
CHEMBL3947540	CHEMBL2835	1	ppb2_NN(Xfp) + NB(ECfp4)
CHEMBL3947770	CHEMBL5407	1	ppb2_NN(Xfp) + NB(ECfp4)
CHEMBL3947770	CHEMBL2147	3	ppb2_NN(Xfp) + NB(ECfp4)
CHEMBL3948039	CHEMBL2835	2	ppb2_NN(Xfp) + NB(ECfp4)
CHEMBL3948039	CHEMBL2971	5	ppb2_NN(Xfp) + NB(ECfp4)
CHEMBL3948056	CHEMBL217	1	ppb2_NN(Xfp) + NB(ECfp4)
CHEMBL3948056	CHEMBL224	2	ppb2_NN(Xfp) + NB(ECfp4)
CHEMBL3948591	CHEMBL2835	2	ppb2_NN(Xfp) + NB(ECfp4)
CHEMBL3948713	CHEMBL233	1	ppb2_NN(Xfp) + NB(ECfp4)
CHEMBL3948713	CHEMBL237	3	ppb2_NN(Xfp) + NB(ECfp4)
CHEMBL3949274	CHEMBL5407	1	ppb2_NN(Xfp) + NB(ECfp4)
CHEMBL3949274	CHEMBL4523	2	ppb2_NN(Xfp) + NB(ECfp4)
CHEMBL3949274	CHEMBL2147	3	ppb2_NN(Xfp) + NB(ECfp4)
CHEMBL3949310	CHEMBL2835	1	ppb2_NN(Xfp) + NB(ECfp4)
CHEMBL3949394	CHEMBL2971	5	ppb2_NN(Xfp) + NB(ECfp4)
CHEMBL3950143	CHEMBL2835	2	ppb2_NN(Xfp) + NB(ECfp4)
CHEMBL3950143	CHEMBL2971	3	ppb2_NN(Xfp) + NB(ECfp4)
CHEMBL3950269	CHEMBL5407	1	ppb2_NN(Xfp) + NB(ECfp4)
CHEMBL3950269	CHEMBL2147	3	ppb2_NN(Xfp) + NB(ECfp4)
CHEMBL3950981	CHEMBL2835	3	ppb2_NN(Xfp) + NB(ECfp4)
CHEMBL3951001	CHEMBL209	1	ppb2_NN(Xfp) + NB(ECfp4)
CHEMBL3951001	CHEMBL1741195	2	ppb2_NN(Xfp) + NB(ECfp4)
CHEMBL3951088	CHEMBL5407	1	ppb2_NN(Xfp) + NB(ECfp4)
CHEMBL3951088	CHEMBL2147	3	ppb2_NN(Xfp) + NB(ECfp4)
CHEMBL3951198	CHEMBL209	1	ppb2_NN(Xfp) + NB(ECfp4)
CHEMBL3951198	CHEMBL1741195	2	ppb2_NN(Xfp) + NB(ECfp4)
CHEMBL3951623	CHEMBL2148	1	ppb2_NN(Xfp) + NB(ECfp4)
CHEMBL3951741	CHEMBL5407	1	ppb2_NN(Xfp) + NB(ECfp4)
CHEMBL3951741	CHEMBL2147	3	ppb2_NN(Xfp) + NB(ECfp4)
CHEMBL3951874	CHEMBL2835	2	ppb2_NN(Xfp) + NB(ECfp4)
CHEMBL3951874	CHEMBL2971	4	ppb2_NN(Xfp) + NB(ECfp4)
CHEMBL3951947	CHEMBL2835	1	ppb2_NN(Xfp) + NB(ECfp4)
CHEMBL3952029	CHEMBL2835	2	ppb2_NN(Xfp) + NB(ECfp4)
CHEMBL3952360	CHEMBL5407	1	ppb2_NN(Xfp) + NB(ECfp4)
CHEMBL3952555	CHEMBL2148	1	ppb2_NN(Xfp) + NB(ECfp4)
CHEMBL3952845	CHEMBL5407	1	ppb2_NN(Xfp) + NB(ECfp4)
CHEMBL3952845	CHEMBL2147	2	ppb2_NN(Xfp) + NB(ECfp4)
CHEMBL3953164	CHEMBL5407	1	ppb2_NN(Xfp) + NB(ECfp4)
CHEMBL3953164	CHEMBL4523	4	ppb2_NN(Xfp) + NB(ECfp4)
CHEMBL3953164	CHEMBL2147	5	ppb2_NN(Xfp) + NB(ECfp4)
CHEMBL3953482	CHEMBL5407	1	ppb2_NN(Xfp) + NB(ECfp4)
CHEMBL3953482	CHEMBL2147	3	ppb2_NN(Xfp) + NB(ECfp4)
CHEMBL3953947	CHEMBL2835	1	ppb2_NN(Xfp) + NB(ECfp4)
CHEMBL3954558	CHEMBL2148	1	ppb2_NN(Xfp) + NB(ECfp4)
CHEMBL3954558	CHEMBL2971	5	ppb2_NN(Xfp) + NB(ECfp4)
CHEMBL3954782	CHEMBL237	1	ppb2_NN(Xfp) + NB(ECfp4)
CHEMBL3954782	CHEMBL236	2	ppb2_NN(Xfp) + NB(ECfp4)
CHEMBL3954782	CHEMBL233	3	ppb2_NN(Xfp) + NB(ECfp4)
CHEMBL3955604	CHEMBL5407	1	ppb2_NN(Xfp) + NB(ECfp4)
CHEMBL3955757	CHEMBL2148	2	ppb2_NN(Xfp) + NB(ECfp4)
CHEMBL3956152	CHEMBL2835	2	ppb2_NN(Xfp) + NB(ECfp4)
CHEMBL3956152	CHEMBL2971	4	ppb2_NN(Xfp) + NB(ECfp4)
CHEMBL3956155	CHEMBL5407	1	ppb2_NN(Xfp) + NB(ECfp4)
CHEMBL3956155	CHEMBL2147	2	ppb2_NN(Xfp) + NB(ECfp4)
CHEMBL3956529	CHEMBL2835	3	ppb2_NN(Xfp) + NB(ECfp4)
CHEMBL3956651	CHEMBL2835	1	ppb2_NN(Xfp) + NB(ECfp4)
CHEMBL3956651	CHEMBL2971	4	ppb2_NN(Xfp) + NB(ECfp4)
CHEMBL3956717	CHEMBL5407	1	ppb2_NN(Xfp) + NB(ECfp4)
CHEMBL3956717	CHEMBL2147	4	ppb2_NN(Xfp) + NB(ECfp4)
CHEMBL3956720	CHEMBL217	1	ppb2_NN(Xfp) + NB(ECfp4)
CHEMBL3956720	CHEMBL224	2	ppb2_NN(Xfp) + NB(ECfp4)
CHEMBL3956720	CHEMBL234	5	ppb2_NN(Xfp) + NB(ECfp4)
CHEMBL3957106	CHEMBL209	1	ppb2_NN(Xfp) + NB(ECfp4)
CHEMBL3957106	CHEMBL1741195	2	ppb2_NN(Xfp) + NB(ECfp4)
CHEMBL3957231	CHEMBL2835	1	ppb2_NN(Xfp) + NB(ECfp4)
CHEMBL3957231	CHEMBL2971	3	ppb2_NN(Xfp) + NB(ECfp4)
CHEMBL3957997	CHEMBL5407	1	ppb2_NN(Xfp) + NB(ECfp4)
CHEMBL3957997	CHEMBL2147	3	ppb2_NN(Xfp) + NB(ECfp4)
CHEMBL3958253	CHEMBL5407	1	ppb2_NN(Xfp) + NB(ECfp4)
CHEMBL3958253	CHEMBL2147	3	ppb2_NN(Xfp) + NB(ECfp4)
CHEMBL3958307	CHEMBL2147	2	ppb2_NN(Xfp) + NB(ECfp4)
CHEMBL3958691	CHEMBL2835	2	ppb2_NN(Xfp) + NB(ECfp4)
CHEMBL3958785	CHEMBL5407	1	ppb2_NN(Xfp) + NB(ECfp4)
CHEMBL3958785	CHEMBL2147	3	ppb2_NN(Xfp) + NB(ECfp4)
CHEMBL3958969	CHEMBL280	1	ppb2_NN(Xfp) + NB(ECfp4)
CHEMBL3958969	CHEMBL333	3	ppb2_NN(Xfp) + NB(ECfp4)
CHEMBL3959005	CHEMBL2835	1	ppb2_NN(Xfp) + NB(ECfp4)
CHEMBL3959091	CHEMBL5407	1	ppb2_NN(Xfp) + NB(ECfp4)
CHEMBL3959091	CHEMBL4523	4	ppb2_NN(Xfp) + NB(ECfp4)
CHEMBL3959266	CHEMBL2835	1	ppb2_NN(Xfp) + NB(ECfp4)
CHEMBL3959358	CHEMBL2971	5	ppb2_NN(Xfp) + NB(ECfp4)
CHEMBL3959398	CHEMBL233	2	ppb2_NN(Xfp) + NB(ECfp4)
CHEMBL3959433	CHEMBL2835	1	ppb2_NN(Xfp) + NB(ECfp4)
CHEMBL3959581	CHEMBL5145	1	ppb2_NN(Xfp) + NB(ECfp4)
CHEMBL3959770	CHEMBL2971	5	ppb2_NN(Xfp) + NB(ECfp4)
CHEMBL3959909	CHEMBL2971	3	ppb2_NN(Xfp) + NB(ECfp4)
CHEMBL3959924	CHEMBL2835	2	ppb2_NN(Xfp) + NB(ECfp4)
CHEMBL3959924	CHEMBL2971	3	ppb2_NN(Xfp) + NB(ECfp4)
CHEMBL3960213	CHEMBL2148	1	ppb2_NN(Xfp) + NB(ECfp4)
CHEMBL3960416	CHEMBL2148	1	ppb2_NN(Xfp) + NB(ECfp4)
CHEMBL3960416	CHEMBL2971	4	ppb2_NN(Xfp) + NB(ECfp4)
CHEMBL3960554	CHEMBL5407	1	ppb2_NN(Xfp) + NB(ECfp4)
CHEMBL3960554	CHEMBL4523	2	ppb2_NN(Xfp) + NB(ECfp4)
CHEMBL3960554	CHEMBL2147	3	ppb2_NN(Xfp) + NB(ECfp4)
CHEMBL3960785	CHEMBL217	2	ppb2_NN(Xfp) + NB(ECfp4)
CHEMBL3960785	CHEMBL224	3	ppb2_NN(Xfp) + NB(ECfp4)
CHEMBL3961360	CHEMBL2147	2	ppb2_NN(Xfp) + NB(ECfp4)
CHEMBL3961360	CHEMBL5407	3	ppb2_NN(Xfp) + NB(ECfp4)
CHEMBL3961393	CHEMBL2835	1	ppb2_NN(Xfp) + NB(ECfp4)
CHEMBL3961525	CHEMBL5407	1	ppb2_NN(Xfp) + NB(ECfp4)
CHEMBL3961525	CHEMBL2147	3	ppb2_NN(Xfp) + NB(ECfp4)
CHEMBL3961670	CHEMBL2971	4	ppb2_NN(Xfp) + NB(ECfp4)
CHEMBL3961670	CHEMBL2835	5	ppb2_NN(Xfp) + NB(ECfp4)
CHEMBL3961692	CHEMBL5407	1	ppb2_NN(Xfp) + NB(ECfp4)
CHEMBL3961692	CHEMBL4523	2	ppb2_NN(Xfp) + NB(ECfp4)
CHEMBL3961692	CHEMBL2147	3	ppb2_NN(Xfp) + NB(ECfp4)
CHEMBL3961850	CHEMBL2148	1	ppb2_NN(Xfp) + NB(ECfp4)
CHEMBL3962342	CHEMBL2835	1	ppb2_NN(Xfp) + NB(ECfp4)
CHEMBL3962342	CHEMBL2971	4	ppb2_NN(Xfp) + NB(ECfp4)
CHEMBL3962386	CHEMBL2835	1	ppb2_NN(Xfp) + NB(ECfp4)
CHEMBL3962386	CHEMBL2971	3	ppb2_NN(Xfp) + NB(ECfp4)
CHEMBL3962448	CHEMBL2148	1	ppb2_NN(Xfp) + NB(ECfp4)
CHEMBL3962506	CHEMBL2835	1	ppb2_NN(Xfp) + NB(ECfp4)
CHEMBL3962525	CHEMBL224	3	ppb2_NN(Xfp) + NB(ECfp4)
CHEMBL3962525	CHEMBL234	5	ppb2_NN(Xfp) + NB(ECfp4)
CHEMBL3963191	CHEMBL2835	1	ppb2_NN(Xfp) + NB(ECfp4)
CHEMBL3963191	CHEMBL2971	3	ppb2_NN(Xfp) + NB(ECfp4)
CHEMBL3963271	CHEMBL2835	2	ppb2_NN(Xfp) + NB(ECfp4)
CHEMBL3963271	CHEMBL2971	3	ppb2_NN(Xfp) + NB(ECfp4)
CHEMBL3963779	CHEMBL2835	2	ppb2_NN(Xfp) + NB(ECfp4)
CHEMBL3963779	CHEMBL2971	3	ppb2_NN(Xfp) + NB(ECfp4)
CHEMBL3963946	CHEMBL5407	2	ppb2_NN(Xfp) + NB(ECfp4)
CHEMBL3963946	CHEMBL2147	4	ppb2_NN(Xfp) + NB(ECfp4)
CHEMBL3964279	CHEMBL2835	2	ppb2_NN(Xfp) + NB(ECfp4)
CHEMBL3964279	CHEMBL2971	4	ppb2_NN(Xfp) + NB(ECfp4)
CHEMBL3964598	CHEMBL233	1	ppb2_NN(Xfp) + NB(ECfp4)
CHEMBL3964598	CHEMBL237	3	ppb2_NN(Xfp) + NB(ECfp4)
CHEMBL3964801	CHEMBL2835	2	ppb2_NN(Xfp) + NB(ECfp4)
CHEMBL3964801	CHEMBL2971	3	ppb2_NN(Xfp) + NB(ECfp4)
CHEMBL3965069	CHEMBL209	1	ppb2_NN(Xfp) + NB(ECfp4)
CHEMBL3965069	CHEMBL1741195	2	ppb2_NN(Xfp) + NB(ECfp4)
CHEMBL3965297	CHEMBL2147	1	ppb2_NN(Xfp) + NB(ECfp4)
CHEMBL3965297	CHEMBL4523	3	ppb2_NN(Xfp) + NB(ECfp4)
CHEMBL3965448	CHEMBL2971	5	ppb2_NN(Xfp) + NB(ECfp4)
CHEMBL3965741	CHEMBL5407	1	ppb2_NN(Xfp) + NB(ECfp4)
CHEMBL3965741	CHEMBL2147	3	ppb2_NN(Xfp) + NB(ECfp4)
CHEMBL3965757	CHEMBL4523	2	ppb2_NN(Xfp) + NB(ECfp4)
CHEMBL3965757	CHEMBL2147	3	ppb2_NN(Xfp) + NB(ECfp4)
CHEMBL3965809	CHEMBL2835	2	ppb2_NN(Xfp) + NB(ECfp4)
CHEMBL3965809	CHEMBL2971	4	ppb2_NN(Xfp) + NB(ECfp4)
CHEMBL3965946	CHEMBL4523	2	ppb2_NN(Xfp) + NB(ECfp4)
CHEMBL3965946	CHEMBL2147	3	ppb2_NN(Xfp) + NB(ECfp4)
CHEMBL3966696	CHEMBL5407	2	ppb2_NN(Xfp) + NB(ECfp4)
CHEMBL3966696	CHEMBL2147	5	ppb2_NN(Xfp) + NB(ECfp4)
CHEMBL3966732	CHEMBL2147	1	ppb2_NN(Xfp) + NB(ECfp4)
CHEMBL3966732	CHEMBL4523	3	ppb2_NN(Xfp) + NB(ECfp4)
CHEMBL3966806	CHEMBL4282	3	ppb2_NN(Xfp) + NB(ECfp4)
CHEMBL3966830	CHEMBL233	1	ppb2_NN(Xfp) + NB(ECfp4)
CHEMBL3966830	CHEMBL237	3	ppb2_NN(Xfp) + NB(ECfp4)
CHEMBL3966842	CHEMBL224	1	ppb2_NN(Xfp) + NB(ECfp4)
CHEMBL3966842	CHEMBL217	2	ppb2_NN(Xfp) + NB(ECfp4)
CHEMBL3967830	CHEMBL2835	2	ppb2_NN(Xfp) + NB(ECfp4)
CHEMBL3968206	CHEMBL5407	1	ppb2_NN(Xfp) + NB(ECfp4)
CHEMBL3968206	CHEMBL2147	3	ppb2_NN(Xfp) + NB(ECfp4)
CHEMBL3968925	CHEMBL4005	1	ppb2_NN(Xfp) + NB(ECfp4)
CHEMBL3968925	CHEMBL3267	3	ppb2_NN(Xfp) + NB(ECfp4)
CHEMBL3969155	CHEMBL237	1	ppb2_NN(Xfp) + NB(ECfp4)
CHEMBL3969155	CHEMBL233	3	ppb2_NN(Xfp) + NB(ECfp4)
CHEMBL3969253	CHEMBL2971	3	ppb2_NN(Xfp) + NB(ECfp4)
CHEMBL3970360	CHEMBL2835	1	ppb2_NN(Xfp) + NB(ECfp4)
CHEMBL3970360	CHEMBL2971	3	ppb2_NN(Xfp) + NB(ECfp4)
CHEMBL3970953	CHEMBL5407	1	ppb2_NN(Xfp) + NB(ECfp4)
CHEMBL3970953	CHEMBL4523	2	ppb2_NN(Xfp) + NB(ECfp4)
CHEMBL3970953	CHEMBL2147	3	ppb2_NN(Xfp) + NB(ECfp4)
CHEMBL3970981	CHEMBL5407	1	ppb2_NN(Xfp) + NB(ECfp4)
CHEMBL3970981	CHEMBL2147	3	ppb2_NN(Xfp) + NB(ECfp4)
CHEMBL3970998	CHEMBL2835	2	ppb2_NN(Xfp) + NB(ECfp4)
CHEMBL3970998	CHEMBL2971	3	ppb2_NN(Xfp) + NB(ECfp4)
CHEMBL3971083	CHEMBL2835	2	ppb2_NN(Xfp) + NB(ECfp4)
CHEMBL3971083	CHEMBL2971	3	ppb2_NN(Xfp) + NB(ECfp4)
CHEMBL3971672	CHEMBL2835	2	ppb2_NN(Xfp) + NB(ECfp4)
CHEMBL3971907	CHEMBL217	2	ppb2_NN(Xfp) + NB(ECfp4)
CHEMBL3971907	CHEMBL224	3	ppb2_NN(Xfp) + NB(ECfp4)
CHEMBL3972050	CHEMBL5407	1	ppb2_NN(Xfp) + NB(ECfp4)
CHEMBL3972050	CHEMBL2147	3	ppb2_NN(Xfp) + NB(ECfp4)
CHEMBL3972453	CHEMBL2147	2	ppb2_NN(Xfp) + NB(ECfp4)
CHEMBL3972612	CHEMBL2835	1	ppb2_NN(Xfp) + NB(ECfp4)
CHEMBL3972612	CHEMBL2971	4	ppb2_NN(Xfp) + NB(ECfp4)
CHEMBL3973544	CHEMBL5407	5	ppb2_NN(Xfp) + NB(ECfp4)
CHEMBL3973848	CHEMBL2148	1	ppb2_NN(Xfp) + NB(ECfp4)
CHEMBL3973848	CHEMBL2971	3	ppb2_NN(Xfp) + NB(ECfp4)
CHEMBL3974857	CHEMBL237	1	ppb2_NN(Xfp) + NB(ECfp4)
CHEMBL3974857	CHEMBL233	3	ppb2_NN(Xfp) + NB(ECfp4)
CHEMBL3975046	CHEMBL2835	1	ppb2_NN(Xfp) + NB(ECfp4)
CHEMBL3975046	CHEMBL2971	2	ppb2_NN(Xfp) + NB(ECfp4)
CHEMBL3975198	CHEMBL5407	1	ppb2_NN(Xfp) + NB(ECfp4)
CHEMBL3975198	CHEMBL2147	3	ppb2_NN(Xfp) + NB(ECfp4)
CHEMBL3975506	CHEMBL2835	2	ppb2_NN(Xfp) + NB(ECfp4)
CHEMBL3975756	CHEMBL5407	1	ppb2_NN(Xfp) + NB(ECfp4)
CHEMBL3975756	CHEMBL2147	2	ppb2_NN(Xfp) + NB(ECfp4)
CHEMBL3975764	CHEMBL5407	1	ppb2_NN(Xfp) + NB(ECfp4)
CHEMBL3975764	CHEMBL2147	2	ppb2_NN(Xfp) + NB(ECfp4)
CHEMBL3975787	CHEMBL2147	2	ppb2_NN(Xfp) + NB(ECfp4)
CHEMBL3975787	CHEMBL5407	3	ppb2_NN(Xfp) + NB(ECfp4)
CHEMBL3976267	CHEMBL5407	1	ppb2_NN(Xfp) + NB(ECfp4)
CHEMBL3976267	CHEMBL4523	2	ppb2_NN(Xfp) + NB(ECfp4)
CHEMBL3976267	CHEMBL2147	4	ppb2_NN(Xfp) + NB(ECfp4)
CHEMBL3976282	CHEMBL217	1	ppb2_NN(Xfp) + NB(ECfp4)
CHEMBL3976282	CHEMBL224	3	ppb2_NN(Xfp) + NB(ECfp4)
CHEMBL3976282	CHEMBL234	5	ppb2_NN(Xfp) + NB(ECfp4)
CHEMBL3976307	CHEMBL2835	2	ppb2_NN(Xfp) + NB(ECfp4)
CHEMBL3976610	CHEMBL2971	3	ppb2_NN(Xfp) + NB(ECfp4)
CHEMBL3977158	CHEMBL3629	1	ppb2_NN(Xfp) + NB(ECfp4)
CHEMBL3977237	CHEMBL2971	1	ppb2_NN(Xfp) + NB(ECfp4)
CHEMBL3977237	CHEMBL2835	5	ppb2_NN(Xfp) + NB(ECfp4)
CHEMBL3977452	CHEMBL2148	2	ppb2_NN(Xfp) + NB(ECfp4)
CHEMBL3977509	CHEMBL2148	1	ppb2_NN(Xfp) + NB(ECfp4)
CHEMBL3977509	CHEMBL2971	2	ppb2_NN(Xfp) + NB(ECfp4)
CHEMBL3979182	CHEMBL4523	2	ppb2_NN(Xfp) + NB(ECfp4)
CHEMBL3979182	CHEMBL2147	4	ppb2_NN(Xfp) + NB(ECfp4)
CHEMBL3980040	CHEMBL5407	1	ppb2_NN(Xfp) + NB(ECfp4)
CHEMBL3980040	CHEMBL2147	3	ppb2_NN(Xfp) + NB(ECfp4)
CHEMBL3980778	CHEMBL2148	1	ppb2_NN(Xfp) + NB(ECfp4)
CHEMBL3980778	CHEMBL2835	2	ppb2_NN(Xfp) + NB(ECfp4)
CHEMBL3980864	CHEMBL237	2	ppb2_NN(Xfp) + NB(ECfp4)
CHEMBL3980864	CHEMBL233	3	ppb2_NN(Xfp) + NB(ECfp4)
CHEMBL3981057	CHEMBL1945	1	ppb2_NN(Xfp) + NB(ECfp4)
CHEMBL3981057	CHEMBL1946	5	ppb2_NN(Xfp) + NB(ECfp4)
CHEMBL3981144	CHEMBL2835	1	ppb2_NN(Xfp) + NB(ECfp4)
CHEMBL3981144	CHEMBL2971	3	ppb2_NN(Xfp) + NB(ECfp4)
CHEMBL3982255	CHEMBL2148	1	ppb2_NN(Xfp) + NB(ECfp4)
CHEMBL3982307	CHEMBL2148	2	ppb2_NN(Xfp) + NB(ECfp4)
CHEMBL3982418	CHEMBL2722	1	ppb2_NN(Xfp) + NB(ECfp4)
CHEMBL3982418	CHEMBL1908	2	ppb2_NN(Xfp) + NB(ECfp4)
CHEMBL3982486	CHEMBL217	1	ppb2_NN(Xfp) + NB(ECfp4)
CHEMBL3982486	CHEMBL224	3	ppb2_NN(Xfp) + NB(ECfp4)
CHEMBL3982539	CHEMBL5407	2	ppb2_NN(Xfp) + NB(ECfp4)
CHEMBL3982539	CHEMBL4523	5	ppb2_NN(Xfp) + NB(ECfp4)
CHEMBL3983040	CHEMBL2835	3	ppb2_NN(Xfp) + NB(ECfp4)
CHEMBL3983040	CHEMBL2971	5	ppb2_NN(Xfp) + NB(ECfp4)
CHEMBL3983351	CHEMBL5407	1	ppb2_NN(Xfp) + NB(ECfp4)
CHEMBL3983351	CHEMBL2147	2	ppb2_NN(Xfp) + NB(ECfp4)
CHEMBL3983983	CHEMBL2835	5	ppb2_NN(Xfp) + NB(ECfp4)
CHEMBL3984183	CHEMBL5407	1	ppb2_NN(Xfp) + NB(ECfp4)
CHEMBL3984183	CHEMBL4523	5	ppb2_NN(Xfp) + NB(ECfp4)
CHEMBL3984282	CHEMBL5145	4	ppb2_NN(Xfp) + NB(ECfp4)
CHEMBL3984319	CHEMBL2835	2	ppb2_NN(Xfp) + NB(ECfp4)
CHEMBL3984319	CHEMBL2971	3	ppb2_NN(Xfp) + NB(ECfp4)
CHEMBL3984720	CHEMBL2835	2	ppb2_NN(Xfp) + NB(ECfp4)
CHEMBL3984741	CHEMBL2835	2	ppb2_NN(Xfp) + NB(ECfp4)
CHEMBL3984741	CHEMBL2971	3	ppb2_NN(Xfp) + NB(ECfp4)
CHEMBL3984764	CHEMBL2148	1	ppb2_NN(Xfp) + NB(ECfp4)
CHEMBL3984764	CHEMBL2971	2	ppb2_NN(Xfp) + NB(ECfp4)
CHEMBL3984793	CHEMBL2148	1	ppb2_NN(Xfp) + NB(ECfp4)
CHEMBL3984961	CHEMBL2147	3	ppb2_NN(Xfp) + NB(ECfp4)

## Sheet: NN(Xfp)
id	ChEMBL-ID	Rank	method
CHEMBL3218576	CHEMBL3130	7	ppb2_NN(Xfp)
CHEMBL3218576	CHEMBL4005	10	ppb2_NN(Xfp)
CHEMBL3884217	CHEMBL205	1	ppb2_NN(Xfp)
CHEMBL3885230	CHEMBL205	1	ppb2_NN(Xfp)
CHEMBL3889835	CHEMBL233	1	ppb2_NN(Xfp)
CHEMBL3889835	CHEMBL2014	4	ppb2_NN(Xfp)
CHEMBL3890156	CHEMBL1741195	1	ppb2_NN(Xfp)
CHEMBL3890156	CHEMBL209	2	ppb2_NN(Xfp)
CHEMBL3890530	CHEMBL2147	2	ppb2_NN(Xfp)
CHEMBL3890530	CHEMBL4523	3	ppb2_NN(Xfp)
CHEMBL3890953	CHEMBL2147	3	ppb2_NN(Xfp)
CHEMBL3890962	CHEMBL3629	1	ppb2_NN(Xfp)
CHEMBL3891137	CHEMBL2835	9	ppb2_NN(Xfp)
CHEMBL3891172	CHEMBL2835	1	ppb2_NN(Xfp)
CHEMBL3891172	CHEMBL2971	6	ppb2_NN(Xfp)
CHEMBL3891228	CHEMBL1741195	1	ppb2_NN(Xfp)
CHEMBL3891228	CHEMBL209	2	ppb2_NN(Xfp)
CHEMBL3891851	CHEMBL2147	3	ppb2_NN(Xfp)
CHEMBL3891851	CHEMBL4523	4	ppb2_NN(Xfp)
CHEMBL3892099	CHEMBL3920	9	ppb2_NN(Xfp)
CHEMBL3892509	CHEMBL2147	1	ppb2_NN(Xfp)
CHEMBL3892509	CHEMBL5407	3	ppb2_NN(Xfp)
CHEMBL3892526	CHEMBL2835	8	ppb2_NN(Xfp)
CHEMBL3892526	CHEMBL2971	9	ppb2_NN(Xfp)
CHEMBL3892536	CHEMBL2147	1	ppb2_NN(Xfp)
CHEMBL3892536	CHEMBL5407	3	ppb2_NN(Xfp)
CHEMBL3893327	CHEMBL2148	1	ppb2_NN(Xfp)
CHEMBL3893327	CHEMBL2971	7	ppb2_NN(Xfp)
CHEMBL3893643	CHEMBL233	1	ppb2_NN(Xfp)
CHEMBL3893643	CHEMBL237	3	ppb2_NN(Xfp)
CHEMBL3893713	CHEMBL2835	2	ppb2_NN(Xfp)
CHEMBL3894557	CHEMBL233	2	ppb2_NN(Xfp)
CHEMBL3894571	CHEMBL2292	1	ppb2_NN(Xfp)
CHEMBL3894571	CHEMBL5543	2	ppb2_NN(Xfp)
CHEMBL3894688	CHEMBL2835	7	ppb2_NN(Xfp)
CHEMBL3895094	CHEMBL2147	1	ppb2_NN(Xfp)
CHEMBL3895272	CHEMBL2835	2	ppb2_NN(Xfp)
CHEMBL3895531	CHEMBL2147	3	ppb2_NN(Xfp)
CHEMBL3895540	CHEMBL217	9	ppb2_NN(Xfp)
CHEMBL3895925	CHEMBL2835	1	ppb2_NN(Xfp)
CHEMBL3895925	CHEMBL2971	8	ppb2_NN(Xfp)
CHEMBL3895998	CHEMBL262	8	ppb2_NN(Xfp)
CHEMBL3896124	CHEMBL2147	1	ppb2_NN(Xfp)
CHEMBL3896124	CHEMBL4523	4	ppb2_NN(Xfp)
CHEMBL3896244	CHEMBL2147	1	ppb2_NN(Xfp)
CHEMBL3896244	CHEMBL4523	2	ppb2_NN(Xfp)
CHEMBL3896312	CHEMBL2147	1	ppb2_NN(Xfp)
CHEMBL3896312	CHEMBL4523	3	ppb2_NN(Xfp)
CHEMBL3896379	CHEMBL2835	2	ppb2_NN(Xfp)
CHEMBL3896662	CHEMBL2835	8	ppb2_NN(Xfp)
CHEMBL3896791	CHEMBL1741195	1	ppb2_NN(Xfp)
CHEMBL3896791	CHEMBL209	2	ppb2_NN(Xfp)
CHEMBL3896877	CHEMBL233	1	ppb2_NN(Xfp)
CHEMBL3896877	CHEMBL237	4	ppb2_NN(Xfp)
CHEMBL3896937	CHEMBL217	1	ppb2_NN(Xfp)
CHEMBL3896937	CHEMBL234	6	ppb2_NN(Xfp)
CHEMBL3897068	CHEMBL233	1	ppb2_NN(Xfp)
CHEMBL3897068	CHEMBL237	3	ppb2_NN(Xfp)
CHEMBL3897108	CHEMBL209	1	ppb2_NN(Xfp)
CHEMBL3897108	CHEMBL1741195	4	ppb2_NN(Xfp)
CHEMBL3897323	CHEMBL2147	1	ppb2_NN(Xfp)
CHEMBL3897323	CHEMBL4523	2	ppb2_NN(Xfp)
CHEMBL3897967	CHEMBL233	1	ppb2_NN(Xfp)
CHEMBL3897967	CHEMBL237	2	ppb2_NN(Xfp)
CHEMBL3898371	CHEMBL3991	4	ppb2_NN(Xfp)
CHEMBL3898989	CHEMBL2147	9	ppb2_NN(Xfp)
CHEMBL3898989	CHEMBL4523	10	ppb2_NN(Xfp)
CHEMBL3899109	CHEMBL2835	2	ppb2_NN(Xfp)
CHEMBL3899281	CHEMBL2835	1	ppb2_NN(Xfp)
CHEMBL3899672	CHEMBL2148	6	ppb2_NN(Xfp)
CHEMBL3899762	CHEMBL2835	6	ppb2_NN(Xfp)
CHEMBL3900248	CHEMBL1741195	1	ppb2_NN(Xfp)
CHEMBL3900248	CHEMBL209	2	ppb2_NN(Xfp)
CHEMBL3900258	CHEMBL2147	7	ppb2_NN(Xfp)
CHEMBL3900258	CHEMBL5407	9	ppb2_NN(Xfp)
CHEMBL3900425	CHEMBL2147	1	ppb2_NN(Xfp)
CHEMBL3900425	CHEMBL4523	2	ppb2_NN(Xfp)
CHEMBL3900752	CHEMBL217	1	ppb2_NN(Xfp)
CHEMBL3900752	CHEMBL224	9	ppb2_NN(Xfp)
CHEMBL3900795	CHEMBL2147	1	ppb2_NN(Xfp)
CHEMBL3900795	CHEMBL4523	2	ppb2_NN(Xfp)
CHEMBL3901124	CHEMBL2148	1	ppb2_NN(Xfp)
CHEMBL3901134	CHEMBL2835	4	ppb2_NN(Xfp)
CHEMBL3901481	CHEMBL2147	1	ppb2_NN(Xfp)
CHEMBL3901481	CHEMBL5407	3	ppb2_NN(Xfp)
CHEMBL3901497	CHEMBL2835	6	ppb2_NN(Xfp)
CHEMBL3902417	CHEMBL2147	4	ppb2_NN(Xfp)
CHEMBL3902417	CHEMBL5407	8	ppb2_NN(Xfp)
CHEMBL3902542	CHEMBL2148	5	ppb2_NN(Xfp)
CHEMBL3903218	CHEMBL2835	6	ppb2_NN(Xfp)
CHEMBL3903272	CHEMBL4625	5	ppb2_NN(Xfp)
CHEMBL3903272	CHEMBL4860	6	ppb2_NN(Xfp)
CHEMBL3903560	CHEMBL234	2	ppb2_NN(Xfp)
CHEMBL3903560	CHEMBL224	7	ppb2_NN(Xfp)
CHEMBL3903686	CHEMBL2147	1	ppb2_NN(Xfp)
CHEMBL3903686	CHEMBL4523	3	ppb2_NN(Xfp)
CHEMBL3903720	CHEMBL2835	9	ppb2_NN(Xfp)
CHEMBL3903777	CHEMBL1741195	1	ppb2_NN(Xfp)
CHEMBL3903777	CHEMBL209	2	ppb2_NN(Xfp)
CHEMBL3903837	CHEMBL2147	1	ppb2_NN(Xfp)
CHEMBL3903837	CHEMBL4523	2	ppb2_NN(Xfp)
CHEMBL3904282	CHEMBL2147	2	ppb2_NN(Xfp)
CHEMBL3904282	CHEMBL4523	4	ppb2_NN(Xfp)
CHEMBL3904335	CHEMBL2835	4	ppb2_NN(Xfp)
CHEMBL3904982	CHEMBL2835	2	ppb2_NN(Xfp)
CHEMBL3905144	CHEMBL2147	9	ppb2_NN(Xfp)
CHEMBL3905150	CHEMBL2148	1	ppb2_NN(Xfp)
CHEMBL3905150	CHEMBL2835	2	ppb2_NN(Xfp)
CHEMBL3905194	CHEMBL2147	1	ppb2_NN(Xfp)
CHEMBL3905194	CHEMBL4523	2	ppb2_NN(Xfp)
CHEMBL3905247	CHEMBL217	1	ppb2_NN(Xfp)
CHEMBL3905247	CHEMBL234	2	ppb2_NN(Xfp)
CHEMBL3905788	CHEMBL2835	2	ppb2_NN(Xfp)
CHEMBL3906357	CHEMBL2147	1	ppb2_NN(Xfp)
CHEMBL3906357	CHEMBL4523	3	ppb2_NN(Xfp)
CHEMBL3906421	CHEMBL2147	2	ppb2_NN(Xfp)
CHEMBL3906798	CHEMBL2147	1	ppb2_NN(Xfp)
CHEMBL3906798	CHEMBL4523	2	ppb2_NN(Xfp)
CHEMBL3906885	CHEMBL2148	2	ppb2_NN(Xfp)
CHEMBL3907010	CHEMBL3105	1	ppb2_NN(Xfp)
CHEMBL3907536	CHEMBL1741195	1	ppb2_NN(Xfp)
CHEMBL3907536	CHEMBL209	2	ppb2_NN(Xfp)
CHEMBL3908409	CHEMBL2835	9	ppb2_NN(Xfp)
CHEMBL3909091	CHEMBL2835	10	ppb2_NN(Xfp)
CHEMBL3909092	CHEMBL2835	7	ppb2_NN(Xfp)
CHEMBL3909280	CHEMBL2147	1	ppb2_NN(Xfp)
CHEMBL3909280	CHEMBL4523	3	ppb2_NN(Xfp)
CHEMBL3909568	CHEMBL2835	8	ppb2_NN(Xfp)
CHEMBL3909568	CHEMBL2971	9	ppb2_NN(Xfp)
CHEMBL3909785	CHEMBL2147	1	ppb2_NN(Xfp)
CHEMBL3909785	CHEMBL4523	4	ppb2_NN(Xfp)
CHEMBL3909947	CHEMBL2147	1	ppb2_NN(Xfp)
CHEMBL3910228	CHEMBL2525	1	ppb2_NN(Xfp)
CHEMBL3910228	CHEMBL4822	2	ppb2_NN(Xfp)
CHEMBL3911037	CHEMBL1945	1	ppb2_NN(Xfp)
CHEMBL3911037	CHEMBL1946	2	ppb2_NN(Xfp)
CHEMBL3913540	CHEMBL2147	2	ppb2_NN(Xfp)
CHEMBL3913540	CHEMBL4523	3	ppb2_NN(Xfp)
CHEMBL3913691	CHEMBL234	2	ppb2_NN(Xfp)
CHEMBL3913691	CHEMBL224	9	ppb2_NN(Xfp)
CHEMBL3914377	CHEMBL2835	3	ppb2_NN(Xfp)
CHEMBL3914377	CHEMBL2971	5	ppb2_NN(Xfp)
CHEMBL3914475	CHEMBL2148	1	ppb2_NN(Xfp)
CHEMBL3914629	CHEMBL1741195	1	ppb2_NN(Xfp)
CHEMBL3914629	CHEMBL209	2	ppb2_NN(Xfp)
CHEMBL3914639	CHEMBL2147	1	ppb2_NN(Xfp)
CHEMBL3914639	CHEMBL4523	3	ppb2_NN(Xfp)
CHEMBL3915323	CHEMBL2147	1	ppb2_NN(Xfp)
CHEMBL3915323	CHEMBL5407	5	ppb2_NN(Xfp)
CHEMBL3916092	CHEMBL3629	1	ppb2_NN(Xfp)
CHEMBL3916122	CHEMBL237	2	ppb2_NN(Xfp)
CHEMBL3916122	CHEMBL233	4	ppb2_NN(Xfp)
CHEMBL3916604	CHEMBL1741195	1	ppb2_NN(Xfp)
CHEMBL3916604	CHEMBL209	2	ppb2_NN(Xfp)
CHEMBL3916637	CHEMBL2835	2	ppb2_NN(Xfp)
CHEMBL3916902	CHEMBL2147	1	ppb2_NN(Xfp)
CHEMBL3916902	CHEMBL5407	8	ppb2_NN(Xfp)
CHEMBL3916961	CHEMBL2722	6	ppb2_NN(Xfp)
CHEMBL3917077	CHEMBL2147	1	ppb2_NN(Xfp)
CHEMBL3917854	CHEMBL2835	7	ppb2_NN(Xfp)
CHEMBL3918076	CHEMBL2147	1	ppb2_NN(Xfp)
CHEMBL3918076	CHEMBL4523	2	ppb2_NN(Xfp)
CHEMBL3918755	CHEMBL217	2	ppb2_NN(Xfp)
CHEMBL3918755	CHEMBL234	3	ppb2_NN(Xfp)
CHEMBL3918755	CHEMBL224	5	ppb2_NN(Xfp)
CHEMBL3919205	CHEMBL5145	8	ppb2_NN(Xfp)
CHEMBL3919646	CHEMBL2147	1	ppb2_NN(Xfp)
CHEMBL3919646	CHEMBL4523	2	ppb2_NN(Xfp)
CHEMBL3919799	CHEMBL2148	1	ppb2_NN(Xfp)
CHEMBL3919848	CHEMBL1741195	1	ppb2_NN(Xfp)
CHEMBL3919848	CHEMBL209	2	ppb2_NN(Xfp)
CHEMBL3920252	CHEMBL217	1	ppb2_NN(Xfp)
CHEMBL3920252	CHEMBL234	2	ppb2_NN(Xfp)
CHEMBL3920292	CHEMBL2835	2	ppb2_NN(Xfp)
CHEMBL3920418	CHEMBL2835	1	ppb2_NN(Xfp)
CHEMBL3920484	CHEMBL2148	1	ppb2_NN(Xfp)
CHEMBL3920581	CHEMBL2148	1	ppb2_NN(Xfp)
CHEMBL3920627	CHEMBL1741195	1	ppb2_NN(Xfp)
CHEMBL3920627	CHEMBL209	2	ppb2_NN(Xfp)
CHEMBL3920681	CHEMBL2148	1	ppb2_NN(Xfp)
CHEMBL3920681	CHEMBL2835	6	ppb2_NN(Xfp)
CHEMBL3920824	CHEMBL2835	7	ppb2_NN(Xfp)
CHEMBL3921320	CHEMBL2148	3	ppb2_NN(Xfp)
CHEMBL3922069	CHEMBL2835	1	ppb2_NN(Xfp)
CHEMBL3924903	CHEMBL2147	2	ppb2_NN(Xfp)
CHEMBL3924903	CHEMBL4523	4	ppb2_NN(Xfp)
CHEMBL3925403	CHEMBL2147	1	ppb2_NN(Xfp)
CHEMBL3925605	CHEMBL2148	1	ppb2_NN(Xfp)
CHEMBL3925958	CHEMBL2835	2	ppb2_NN(Xfp)
CHEMBL3925958	CHEMBL2971	3	ppb2_NN(Xfp)
CHEMBL3926007	CHEMBL2147	1	ppb2_NN(Xfp)
CHEMBL3926007	CHEMBL4523	2	ppb2_NN(Xfp)
CHEMBL3926059	CHEMBL2148	1	ppb2_NN(Xfp)
CHEMBL3926059	CHEMBL2971	2	ppb2_NN(Xfp)
CHEMBL3926930	CHEMBL2148	9	ppb2_NN(Xfp)
CHEMBL3927136	CHEMBL237	1	ppb2_NN(Xfp)
CHEMBL3927136	CHEMBL233	2	ppb2_NN(Xfp)
CHEMBL3927952	CHEMBL2147	1	ppb2_NN(Xfp)
CHEMBL3927952	CHEMBL4523	3	ppb2_NN(Xfp)
CHEMBL3928595	CHEMBL2147	1	ppb2_NN(Xfp)
CHEMBL3928595	CHEMBL4523	3	ppb2_NN(Xfp)
CHEMBL3929011	CHEMBL2147	1	ppb2_NN(Xfp)
CHEMBL3929011	CHEMBL4523	3	ppb2_NN(Xfp)
CHEMBL3929168	CHEMBL217	1	ppb2_NN(Xfp)
CHEMBL3929168	CHEMBL234	2	ppb2_NN(Xfp)
CHEMBL3929168	CHEMBL224	9	ppb2_NN(Xfp)
CHEMBL3929264	CHEMBL2147	1	ppb2_NN(Xfp)
CHEMBL3929264	CHEMBL5407	7	ppb2_NN(Xfp)
CHEMBL3929534	CHEMBL209	1	ppb2_NN(Xfp)
CHEMBL3929534	CHEMBL1741195	9	ppb2_NN(Xfp)
CHEMBL3929734	CHEMBL2835	2	ppb2_NN(Xfp)
CHEMBL3930290	CHEMBL2148	1	ppb2_NN(Xfp)
CHEMBL3930620	CHEMBL325	2	ppb2_NN(Xfp)
CHEMBL3930620	CHEMBL203	4	ppb2_NN(Xfp)
CHEMBL3930712	CHEMBL2148	1	ppb2_NN(Xfp)
CHEMBL3931150	CHEMBL2835	1	ppb2_NN(Xfp)
CHEMBL3931278	CHEMBL2835	5	ppb2_NN(Xfp)
CHEMBL3931279	CHEMBL2147	1	ppb2_NN(Xfp)
CHEMBL3932186	CHEMBL234	2	ppb2_NN(Xfp)
CHEMBL3932460	CHEMBL2147	2	ppb2_NN(Xfp)
CHEMBL3932460	CHEMBL4523	3	ppb2_NN(Xfp)
CHEMBL3933868	CHEMBL2147	10	ppb2_NN(Xfp)
CHEMBL3934335	CHEMBL2835	2	ppb2_NN(Xfp)
CHEMBL3934335	CHEMBL2971	5	ppb2_NN(Xfp)
CHEMBL3934383	CHEMBL2147	1	ppb2_NN(Xfp)
CHEMBL3934383	CHEMBL4523	3	ppb2_NN(Xfp)
CHEMBL3934942	CHEMBL2148	8	ppb2_NN(Xfp)
CHEMBL3934942	CHEMBL2971	10	ppb2_NN(Xfp)
CHEMBL3935018	CHEMBL2147	1	ppb2_NN(Xfp)
CHEMBL3935018	CHEMBL4523	3	ppb2_NN(Xfp)
CHEMBL3935018	CHEMBL5407	8	ppb2_NN(Xfp)
CHEMBL3935096	CHEMBL2147	1	ppb2_NN(Xfp)
CHEMBL3935096	CHEMBL4523	3	ppb2_NN(Xfp)
CHEMBL3935178	CHEMBL2835	1	ppb2_NN(Xfp)
CHEMBL3935396	CHEMBL2835	8	ppb2_NN(Xfp)
CHEMBL3936320	CHEMBL2147	1	ppb2_NN(Xfp)
CHEMBL3936320	CHEMBL4523	2	ppb2_NN(Xfp)
CHEMBL3936541	CHEMBL2835	8	ppb2_NN(Xfp)
CHEMBL3936541	CHEMBL2971	9	ppb2_NN(Xfp)
CHEMBL3936992	CHEMBL2147	1	ppb2_NN(Xfp)
CHEMBL3936992	CHEMBL4523	2	ppb2_NN(Xfp)
CHEMBL3937034	CHEMBL2147	1	ppb2_NN(Xfp)
CHEMBL3937204	CHEMBL2148	10	ppb2_NN(Xfp)
CHEMBL3937222	CHEMBL1741195	1	ppb2_NN(Xfp)
CHEMBL3937222	CHEMBL209	2	ppb2_NN(Xfp)
CHEMBL3937835	CHEMBL2148	3	ppb2_NN(Xfp)
CHEMBL3937878	CHEMBL2835	6	ppb2_NN(Xfp)
CHEMBL3938031	CHEMBL2835	6	ppb2_NN(Xfp)
CHEMBL3938210	CHEMBL217	1	ppb2_NN(Xfp)
CHEMBL3938210	CHEMBL234	2	ppb2_NN(Xfp)
CHEMBL3938583	CHEMBL2147	1	ppb2_NN(Xfp)
CHEMBL3938583	CHEMBL5407	7	ppb2_NN(Xfp)
CHEMBL3938660	CHEMBL2835	7	ppb2_NN(Xfp)
CHEMBL3939101	CHEMBL2147	5	ppb2_NN(Xfp)
CHEMBL3939394	CHEMBL2147	2	ppb2_NN(Xfp)
CHEMBL3939394	CHEMBL5407	9	ppb2_NN(Xfp)
CHEMBL3939580	CHEMBL2148	1	ppb2_NN(Xfp)
CHEMBL3939580	CHEMBL2835	2	ppb2_NN(Xfp)
CHEMBL3940227	CHEMBL2147	1	ppb2_NN(Xfp)
CHEMBL3940227	CHEMBL5407	3	ppb2_NN(Xfp)
CHEMBL3940712	CHEMBL234	3	ppb2_NN(Xfp)
CHEMBL3940712	CHEMBL224	6	ppb2_NN(Xfp)
CHEMBL3940744	CHEMBL2147	1	ppb2_NN(Xfp)
CHEMBL3940744	CHEMBL4523	2	ppb2_NN(Xfp)
CHEMBL3941202	CHEMBL2835	1	ppb2_NN(Xfp)
CHEMBL3941211	CHEMBL2148	1	ppb2_NN(Xfp)
CHEMBL3942104	CHEMBL2147	1	ppb2_NN(Xfp)
CHEMBL3942446	CHEMBL2147	1	ppb2_NN(Xfp)
CHEMBL3942446	CHEMBL5407	7	ppb2_NN(Xfp)
CHEMBL3943096	CHEMBL1741195	1	ppb2_NN(Xfp)
CHEMBL3943096	CHEMBL209	2	ppb2_NN(Xfp)
CHEMBL3943705	CHEMBL2147	1	ppb2_NN(Xfp)
CHEMBL3943705	CHEMBL4523	3	ppb2_NN(Xfp)
CHEMBL3943759	CHEMBL2147	1	ppb2_NN(Xfp)
CHEMBL3943759	CHEMBL5407	10	ppb2_NN(Xfp)
CHEMBL3944062	CHEMBL2147	1	ppb2_NN(Xfp)
CHEMBL3944062	CHEMBL4523	3	ppb2_NN(Xfp)
CHEMBL3944062	CHEMBL5407	10	ppb2_NN(Xfp)
CHEMBL3946306	CHEMBL2147	1	ppb2_NN(Xfp)
CHEMBL3946306	CHEMBL5407	10	ppb2_NN(Xfp)
CHEMBL3946970	CHEMBL2147	1	ppb2_NN(Xfp)
CHEMBL3946970	CHEMBL4523	3	ppb2_NN(Xfp)
CHEMBL3946970	CHEMBL5407	5	ppb2_NN(Xfp)
CHEMBL3946995	CHEMBL234	2	ppb2_NN(Xfp)
CHEMBL3946995	CHEMBL224	10	ppb2_NN(Xfp)
CHEMBL3947292	CHEMBL2835	1	ppb2_NN(Xfp)
CHEMBL3947309	CHEMBL2147	1	ppb2_NN(Xfp)
CHEMBL3947309	CHEMBL5407	10	ppb2_NN(Xfp)
CHEMBL3947456	CHEMBL2835	8	ppb2_NN(Xfp)
CHEMBL3947484	CHEMBL2147	2	ppb2_NN(Xfp)
CHEMBL3947484	CHEMBL5407	9	ppb2_NN(Xfp)
CHEMBL3947540	CHEMBL2835	1	ppb2_NN(Xfp)
CHEMBL3947770	CHEMBL2147	1	ppb2_NN(Xfp)
CHEMBL3947770	CHEMBL5407	3	ppb2_NN(Xfp)
CHEMBL3948039	CHEMBL2835	4	ppb2_NN(Xfp)
CHEMBL3948056	CHEMBL217	1	ppb2_NN(Xfp)
CHEMBL3948056	CHEMBL224	4	ppb2_NN(Xfp)
CHEMBL3948056	CHEMBL234	8	ppb2_NN(Xfp)
CHEMBL3948713	CHEMBL233	1	ppb2_NN(Xfp)
CHEMBL3948713	CHEMBL237	3	ppb2_NN(Xfp)
CHEMBL3949136	CHEMBL2973	9	ppb2_NN(Xfp)
CHEMBL3949274	CHEMBL2147	1	ppb2_NN(Xfp)
CHEMBL3949274	CHEMBL4523	3	ppb2_NN(Xfp)
CHEMBL3949274	CHEMBL5407	10	ppb2_NN(Xfp)
CHEMBL3949310	CHEMBL2835	1	ppb2_NN(Xfp)
CHEMBL3949394	CHEMBL2835	5	ppb2_NN(Xfp)
CHEMBL3950143	CHEMBL2835	8	ppb2_NN(Xfp)
CHEMBL3950143	CHEMBL2971	9	ppb2_NN(Xfp)
CHEMBL3950269	CHEMBL2147	1	ppb2_NN(Xfp)
CHEMBL3951001	CHEMBL1741195	1	ppb2_NN(Xfp)
CHEMBL3951001	CHEMBL209	2	ppb2_NN(Xfp)
CHEMBL3951088	CHEMBL2147	2	ppb2_NN(Xfp)
CHEMBL3951178	CHEMBL2835	8	ppb2_NN(Xfp)
CHEMBL3951178	CHEMBL2971	9	ppb2_NN(Xfp)
CHEMBL3951198	CHEMBL1741195	1	ppb2_NN(Xfp)
CHEMBL3951198	CHEMBL209	2	ppb2_NN(Xfp)
CHEMBL3951741	CHEMBL2147	1	ppb2_NN(Xfp)
CHEMBL3951741	CHEMBL5407	6	ppb2_NN(Xfp)
CHEMBL3951874	CHEMBL2835	7	ppb2_NN(Xfp)
CHEMBL3952029	CHEMBL2835	7	ppb2_NN(Xfp)
CHEMBL3952360	CHEMBL2147	7	ppb2_NN(Xfp)
CHEMBL3952845	CHEMBL2147	1	ppb2_NN(Xfp)
CHEMBL3953164	CHEMBL2147	1	ppb2_NN(Xfp)
CHEMBL3953164	CHEMBL4523	3	ppb2_NN(Xfp)
CHEMBL3953482	CHEMBL2147	1	ppb2_NN(Xfp)
CHEMBL3953482	CHEMBL5407	8	ppb2_NN(Xfp)
CHEMBL3954558	CHEMBL2148	1	ppb2_NN(Xfp)
CHEMBL3954558	CHEMBL2971	3	ppb2_NN(Xfp)
CHEMBL3954782	CHEMBL233	1	ppb2_NN(Xfp)
CHEMBL3954782	CHEMBL237	2	ppb2_NN(Xfp)
CHEMBL3954782	CHEMBL236	3	ppb2_NN(Xfp)
CHEMBL3955604	CHEMBL2147	1	ppb2_NN(Xfp)
CHEMBL3955743	CHEMBL5145	9	ppb2_NN(Xfp)
CHEMBL3955757	CHEMBL2148	1	ppb2_NN(Xfp)
CHEMBL3955757	CHEMBL2971	3	ppb2_NN(Xfp)
CHEMBL3955880	CHEMBL2147	5	ppb2_NN(Xfp)
CHEMBL3956152	CHEMBL2835	2	ppb2_NN(Xfp)
CHEMBL3956155	CHEMBL2147	1	ppb2_NN(Xfp)
CHEMBL3956717	CHEMBL2147	5	ppb2_NN(Xfp)
CHEMBL3956720	CHEMBL217	1	ppb2_NN(Xfp)
CHEMBL3956720	CHEMBL234	2	ppb2_NN(Xfp)
CHEMBL3957073	CHEMBL2147	1	ppb2_NN(Xfp)
CHEMBL3957073	CHEMBL4523	2	ppb2_NN(Xfp)
CHEMBL3957106	CHEMBL1741195	1	ppb2_NN(Xfp)
CHEMBL3957106	CHEMBL209	2	ppb2_NN(Xfp)
CHEMBL3957231	CHEMBL2835	10	ppb2_NN(Xfp)
CHEMBL3957954	CHEMBL2147	2	ppb2_NN(Xfp)
CHEMBL3957954	CHEMBL4523	4	ppb2_NN(Xfp)
CHEMBL3957997	CHEMBL2147	1	ppb2_NN(Xfp)
CHEMBL3958253	CHEMBL2147	1	ppb2_NN(Xfp)
CHEMBL3958253	CHEMBL5407	3	ppb2_NN(Xfp)
CHEMBL3958307	CHEMBL2147	1	ppb2_NN(Xfp)
CHEMBL3958307	CHEMBL4523	4	ppb2_NN(Xfp)
CHEMBL3958785	CHEMBL2147	1	ppb2_NN(Xfp)
CHEMBL3958969	CHEMBL333	9	ppb2_NN(Xfp)
CHEMBL3959005	CHEMBL2835	1	ppb2_NN(Xfp)
CHEMBL3959091	CHEMBL2147	1	ppb2_NN(Xfp)
CHEMBL3959091	CHEMBL4523	2	ppb2_NN(Xfp)
CHEMBL3959091	CHEMBL5407	3	ppb2_NN(Xfp)
CHEMBL3959358	CHEMBL2835	5	ppb2_NN(Xfp)
CHEMBL3959358	CHEMBL2971	6	ppb2_NN(Xfp)
CHEMBL3959398	CHEMBL233	2	ppb2_NN(Xfp)
CHEMBL3959433	CHEMBL2835	1	ppb2_NN(Xfp)
CHEMBL3959924	CHEMBL2835	8	ppb2_NN(Xfp)
CHEMBL3959924	CHEMBL2971	9	ppb2_NN(Xfp)
CHEMBL3960213	CHEMBL2148	1	ppb2_NN(Xfp)
CHEMBL3960213	CHEMBL2971	3	ppb2_NN(Xfp)
CHEMBL3960416	CHEMBL2148	1	ppb2_NN(Xfp)
CHEMBL3960554	CHEMBL2147	1	ppb2_NN(Xfp)
CHEMBL3960554	CHEMBL4523	3	ppb2_NN(Xfp)
CHEMBL3960785	CHEMBL217	1	ppb2_NN(Xfp)
CHEMBL3960785	CHEMBL234	2	ppb2_NN(Xfp)
CHEMBL3961360	CHEMBL2147	5	ppb2_NN(Xfp)
CHEMBL3961360	CHEMBL5407	7	ppb2_NN(Xfp)
CHEMBL3961525	CHEMBL2147	1	ppb2_NN(Xfp)
CHEMBL3961525	CHEMBL5407	5	ppb2_NN(Xfp)
CHEMBL3961850	CHEMBL2148	1	ppb2_NN(Xfp)
CHEMBL3962342	CHEMBL2835	8	ppb2_NN(Xfp)
CHEMBL3962386	CHEMBL2835	1	ppb2_NN(Xfp)
CHEMBL3962506	CHEMBL2835	1	ppb2_NN(Xfp)
CHEMBL3962525	CHEMBL234	2	ppb2_NN(Xfp)
CHEMBL3963191	CHEMBL2835	2	ppb2_NN(Xfp)
CHEMBL3963271	CHEMBL2835	8	ppb2_NN(Xfp)
CHEMBL3963779	CHEMBL2835	4	ppb2_NN(Xfp)
CHEMBL3963779	CHEMBL2971	9	ppb2_NN(Xfp)
CHEMBL3963946	CHEMBL2147	1	ppb2_NN(Xfp)
CHEMBL3963946	CHEMBL5407	5	ppb2_NN(Xfp)
CHEMBL3964598	CHEMBL233	1	ppb2_NN(Xfp)
CHEMBL3964598	CHEMBL237	2	ppb2_NN(Xfp)
CHEMBL3964801	CHEMBL2835	2	ppb2_NN(Xfp)
CHEMBL3965069	CHEMBL1741195	1	ppb2_NN(Xfp)
CHEMBL3965069	CHEMBL209	2	ppb2_NN(Xfp)
CHEMBL3965297	CHEMBL2147	1	ppb2_NN(Xfp)
CHEMBL3965297	CHEMBL4523	2	ppb2_NN(Xfp)
CHEMBL3965448	CHEMBL2835	1	ppb2_NN(Xfp)
CHEMBL3965448	CHEMBL2971	6	ppb2_NN(Xfp)
CHEMBL3965643	CHEMBL2147	1	ppb2_NN(Xfp)
CHEMBL3965643	CHEMBL4523	2	ppb2_NN(Xfp)
CHEMBL3965741	CHEMBL2147	6	ppb2_NN(Xfp)
CHEMBL3965757	CHEMBL2147	1	ppb2_NN(Xfp)
CHEMBL3965757	CHEMBL4523	2	ppb2_NN(Xfp)
CHEMBL3965946	CHEMBL2147	1	ppb2_NN(Xfp)
CHEMBL3965946	CHEMBL4523	2	ppb2_NN(Xfp)
CHEMBL3966363	CHEMBL2147	1	ppb2_NN(Xfp)
CHEMBL3966363	CHEMBL4523	3	ppb2_NN(Xfp)
CHEMBL3966696	CHEMBL2147	6	ppb2_NN(Xfp)
CHEMBL3966732	CHEMBL2147	1	ppb2_NN(Xfp)
CHEMBL3966732	CHEMBL4523	2	ppb2_NN(Xfp)
CHEMBL3966830	CHEMBL233	1	ppb2_NN(Xfp)
CHEMBL3966830	CHEMBL237	2	ppb2_NN(Xfp)
CHEMBL3966842	CHEMBL217	1	ppb2_NN(Xfp)
CHEMBL3966842	CHEMBL224	4	ppb2_NN(Xfp)
CHEMBL3966842	CHEMBL234	6	ppb2_NN(Xfp)
CHEMBL3968206	CHEMBL2147	1	ppb2_NN(Xfp)
CHEMBL3968206	CHEMBL5407	6	ppb2_NN(Xfp)
CHEMBL3968925	CHEMBL4005	2	ppb2_NN(Xfp)
CHEMBL3968925	CHEMBL3267	5	ppb2_NN(Xfp)
CHEMBL3969155	CHEMBL233	1	ppb2_NN(Xfp)
CHEMBL3969155	CHEMBL237	3	ppb2_NN(Xfp)
CHEMBL3969253	CHEMBL2835	5	ppb2_NN(Xfp)
CHEMBL3970360	CHEMBL2835	2	ppb2_NN(Xfp)
CHEMBL3970953	CHEMBL2147	5	ppb2_NN(Xfp)
CHEMBL3970953	CHEMBL4523	7	ppb2_NN(Xfp)
CHEMBL3970981	CHEMBL2147	3	ppb2_NN(Xfp)
CHEMBL3970981	CHEMBL5407	10	ppb2_NN(Xfp)
CHEMBL3971083	CHEMBL2835	3	ppb2_NN(Xfp)
CHEMBL3971538	CHEMBL1945	1	ppb2_NN(Xfp)
CHEMBL3971538	CHEMBL1946	5	ppb2_NN(Xfp)
CHEMBL3971672	CHEMBL2835	7	ppb2_NN(Xfp)
CHEMBL3971907	CHEMBL217	1	ppb2_NN(Xfp)
CHEMBL3971907	CHEMBL234	2	ppb2_NN(Xfp)
CHEMBL3972050	CHEMBL2147	1	ppb2_NN(Xfp)
CHEMBL3972050	CHEMBL5407	8	ppb2_NN(Xfp)
CHEMBL3972453	CHEMBL2147	2	ppb2_NN(Xfp)
CHEMBL3973487	CHEMBL234	2	ppb2_NN(Xfp)
CHEMBL3973544	CHEMBL2147	1	ppb2_NN(Xfp)
CHEMBL3973544	CHEMBL5407	5	ppb2_NN(Xfp)
CHEMBL3973848	CHEMBL2148	1	ppb2_NN(Xfp)
CHEMBL3973848	CHEMBL2971	9	ppb2_NN(Xfp)
CHEMBL3974543	CHEMBL2147	1	ppb2_NN(Xfp)
CHEMBL3974543	CHEMBL4523	4	ppb2_NN(Xfp)
CHEMBL3974857	CHEMBL233	2	ppb2_NN(Xfp)
CHEMBL3974857	CHEMBL237	4	ppb2_NN(Xfp)
CHEMBL3975046	CHEMBL2835	1	ppb2_NN(Xfp)
CHEMBL3975198	CHEMBL2147	1	ppb2_NN(Xfp)
CHEMBL3975756	CHEMBL2147	5	ppb2_NN(Xfp)
CHEMBL3975756	CHEMBL5407	8	ppb2_NN(Xfp)
CHEMBL3975764	CHEMBL2147	2	ppb2_NN(Xfp)
CHEMBL3975787	CHEMBL2147	1	ppb2_NN(Xfp)
CHEMBL3976267	CHEMBL2147	1	ppb2_NN(Xfp)
CHEMBL3976267	CHEMBL4523	3	ppb2_NN(Xfp)
CHEMBL3976282	CHEMBL217	1	ppb2_NN(Xfp)
CHEMBL3976282	CHEMBL234	2	ppb2_NN(Xfp)
CHEMBL3976282	CHEMBL224	9	ppb2_NN(Xfp)
CHEMBL3976610	CHEMBL2835	5	ppb2_NN(Xfp)
CHEMBL3977158	CHEMBL3629	1	ppb2_NN(Xfp)
CHEMBL3977237	CHEMBL2835	6	ppb2_NN(Xfp)
CHEMBL3977509	CHEMBL2148	3	ppb2_NN(Xfp)
CHEMBL3979537	CHEMBL2835	9	ppb2_NN(Xfp)
CHEMBL3980040	CHEMBL2147	2	ppb2_NN(Xfp)
CHEMBL3980778	CHEMBL2148	1	ppb2_NN(Xfp)
CHEMBL3980778	CHEMBL2835	2	ppb2_NN(Xfp)
CHEMBL3980864	CHEMBL233	1	ppb2_NN(Xfp)
CHEMBL3980864	CHEMBL237	2	ppb2_NN(Xfp)
CHEMBL3980959	CHEMBL2971	6	ppb2_NN(Xfp)
CHEMBL3981057	CHEMBL1945	1	ppb2_NN(Xfp)
CHEMBL3981057	CHEMBL1946	5	ppb2_NN(Xfp)
CHEMBL3981144	CHEMBL2971	7	ppb2_NN(Xfp)
CHEMBL3981144	CHEMBL2835	9	ppb2_NN(Xfp)
CHEMBL3982307	CHEMBL2148	2	ppb2_NN(Xfp)
CHEMBL3982307	CHEMBL2971	4	ppb2_NN(Xfp)
CHEMBL3982486	CHEMBL217	1	ppb2_NN(Xfp)
CHEMBL3982486	CHEMBL234	2	ppb2_NN(Xfp)
CHEMBL3982539	CHEMBL2147	1	ppb2_NN(Xfp)
CHEMBL3982539	CHEMBL4523	3	ppb2_NN(Xfp)
CHEMBL3983351	CHEMBL2147	1	ppb2_NN(Xfp)
CHEMBL3984183	CHEMBL2147	1	ppb2_NN(Xfp)
CHEMBL3984183	CHEMBL4523	2	ppb2_NN(Xfp)
CHEMBL3984183	CHEMBL5407	7	ppb2_NN(Xfp)
CHEMBL3984319	CHEMBL2835	2	ppb2_NN(Xfp)
CHEMBL3984720	CHEMBL2835	8	ppb2_NN(Xfp)
CHEMBL3984741	CHEMBL2835	8	ppb2_NN(Xfp)
CHEMBL3984741	CHEMBL2971	9	ppb2_NN(Xfp)
CHEMBL3984764	CHEMBL2148	1	ppb2_NN(Xfp)

## Sheet: PPB
id	ChEMBL-ID	APfp	ECfp4	Ffp1	Ffp2	Ffp3	Ffp4	MQN	SMIfp	Sfp	Xfp	identical	Rank	method
CHEMBL3218576	CHEMBL3130	1	0.004	0.002	0.19	0	0.029	1	1	0	0.253	0	2	ppb
CHEMBL3218576	CHEMBL4005	1	0.009	0.011	1	0.002	0.115	1	1	0	1	0	9	ppb
CHEMBL3889835	CHEMBL2014	1	0	0.009	1	0.026	0.031	1	0.026	1	0.052	0	2	ppb
CHEMBL3889936	CHEMBL280	0.653	0.044	1	0.066	0.327	1	0.173	1	0.248	1	0	3	ppb
CHEMBL3889936	CHEMBL4270	1	0.002	1	1	0.132	0.114	1	1	0.057	1	0	9	ppb
CHEMBL3890530	CHEMBL2147	1	1	0.577	0.342	0.682	1	0.026	0.638	1	1	0	4	ppb
CHEMBL3890530	CHEMBL4523	1	1	0.463	0.238	0.589	1	0.015	1	1	1	0	10	ppb
CHEMBL3891057	CHEMBL2971	1	0.947	1	1	0.986	0.989	1	0.795	0.816	1	0	3	ppb
CHEMBL3891137	CHEMBL2971	1	0.977	1	1	0.99	1	1	0.795	0.847	1	0	3	ppb
CHEMBL3891228	CHEMBL209	1	0.387	0.614	0.509	0.523	0.456	1	1	1	1	0	9	ppb
CHEMBL3891851	CHEMBL4523	0.068	0.775	0.439	0.241	0.422	0.198	1	1	0.691	1	0	1	ppb
CHEMBL3891851	CHEMBL2147	0.105	0.851	0.556	0.346	0.532	0.3	1	1	0.755	1	0	2	ppb
CHEMBL3891851	CHEMBL5407	0.06	1	0.399	0.23	0.388	0.181	1	1	0.689	1	0	3	ppb
CHEMBL3893327	CHEMBL2148	1	1	0.003	0.011	0.028	0.019	1	1	0.02	0.01	0	2	ppb
CHEMBL3893643	CHEMBL237	1	0.054	0.059	0.046	0.031	0.006	1	1	0.04	0.924	0	5	ppb
CHEMBL3894557	CHEMBL233	0.052	0	0	0	0	0	0	0.304	0	0	0	2	ppb
CHEMBL3894571	CHEMBL5543	1	0	0	0	0	0	0	0	0	0	0	1	ppb
CHEMBL3894571	CHEMBL2292	1	0	0	0	0	0	0	0	0	0	0	2	ppb
CHEMBL3894688	CHEMBL2971	1	1	0.964	1	0.963	0.983	1	0.549	0.836	1	0	2	ppb
CHEMBL3895094	CHEMBL5407	0.036	1	0.586	1	0.647	0.39	0.013	1	1	1	0	4	ppb
CHEMBL3895094	CHEMBL2147	0.067	1	0.719	1	0.758	0.532	0.026	1	1	1	0	6	ppb
CHEMBL3895531	CHEMBL5407	1	1	0.356	1	0.519	0.31	0.037	1	1	1	0	4	ppb
CHEMBL3895531	CHEMBL2147	1	1	0.514	1	0.652	0.45	0.066	1	1	1	0	6	ppb
CHEMBL3896005	CHEMBL2971	1	1	0.965	1	0.984	0.997	1	1	0.91	0.93	0	2	ppb
CHEMBL3896124	CHEMBL2147	1	1	0.548	0.408	0.792	0.767	1	1	1	0.606	0	1	ppb
CHEMBL3896141	CHEMBL2971	1	0.987	1	1	0.988	0.991	1	1	0.836	1	0	4	ppb
CHEMBL3896244	CHEMBL4523	0.009	0.814	0.344	0.171	0.409	0.299	0.042	0.152	1	0.193	0	2	ppb
CHEMBL3896244	CHEMBL2147	0.017	0.88	0.466	0.261	0.521	0.411	0.066	0.233	1	0.28	0	3	ppb
CHEMBL3896312	CHEMBL5407	1	0.616	0.287	1	0.249	0.128	1	1	0.592	1	0	3	ppb
CHEMBL3896312	CHEMBL4523	1	0.634	0.322	1	0.276	0.14	1	1	0.598	1	0	4	ppb
CHEMBL3896312	CHEMBL2147	1	0.736	0.444	1	0.388	0.23	1	1	0.673	1	0	5	ppb
CHEMBL3896379	CHEMBL2971	1	0.969	0.84	0.871	0.889	0.867	0.105	0.685	0.828	1	0	1	ppb
CHEMBL3896662	CHEMBL2971	1	0.977	0.985	1	0.994	1	1	0.795	0.836	1	0	2	ppb
CHEMBL3896877	CHEMBL237	1	1	1	1	0.546	1	1	0.147	0.128	0.834	0	6	ppb
CHEMBL3896937	CHEMBL224	1	0.255	0.088	0.143	0.087	0.085	1	0.155	1	1	0	6	ppb
CHEMBL3896937	CHEMBL234	1	0.246	0.195	0.06	0.123	0.169	1	0.144	1	1	0	7	ppb
CHEMBL3897068	CHEMBL237	1	1	0.031	0.354	0.019	0.033	1	1	0.008	0.098	0	8	ppb
CHEMBL3897108	CHEMBL209	1	0.336	0.15	0.004	0.202	0.184	1	0.119	1	0.03	0	1	ppb
CHEMBL3897112	CHEMBL2971	1	1	0.881	1	0.945	0.971	1	1	0.927	0.909	0	3	ppb
CHEMBL3897323	CHEMBL4523	0.301	1	0.308	0.132	0.364	0.261	0.042	0.077	1	0.175	0	2	ppb
CHEMBL3897323	CHEMBL2147	0.387	1	0.43	0.211	0.477	0.37	0.066	0.129	1	0.259	0	3	ppb
CHEMBL3897606	CHEMBL2147	1	1	0.702	0.436	0.881	0.841	1	0.363	1	1	0	2	ppb
CHEMBL3897912	CHEMBL5407	1	1	0.642	0.462	0.621	0.457	1	0.37	0.782	1	0	2	ppb
CHEMBL3897912	CHEMBL2147	1	1	0.73	0.609	0.737	0.597	1	0.504	0.83	1	0	3	ppb
CHEMBL3897912	CHEMBL4523	1	1	0.643	0.494	0.655	0.493	1	1	0.78	1	0	5	ppb
CHEMBL3899281	CHEMBL2971	1	1	0.815	0.269	0.895	0.709	0.198	0.401	1	1	0	3	ppb
CHEMBL3899672	CHEMBL2835	1	0.003	1	0.047	1	0.016	1	0.129	0.002	1	0	4	ppb
CHEMBL3899672	CHEMBL2148	1	0.003	1	0.072	1	0.026	1	0.203	0.005	1	0	5	ppb
CHEMBL3899762	CHEMBL2971	1	0.931	1	1	0.988	0.996	1	0.795	0.836	1	0	1	ppb
CHEMBL3900258	CHEMBL5407	1	1	0.579	0.251	0.585	0.388	0.013	1	1	1	0	4	ppb
CHEMBL3900258	CHEMBL2147	1	1	0.712	0.373	0.707	0.53	0.026	1	1	1	0	5	ppb
CHEMBL3900752	CHEMBL224	1	0.083	1	0.206	1	0.145	0.346	0.275	1	0.041	0	4	ppb
CHEMBL3900795	CHEMBL4523	1	1	0.325	0.166	0.378	0.289	0.042	0.152	1	0.19	0	2	ppb
CHEMBL3900795	CHEMBL2147	1	1	0.447	0.255	0.491	0.4	0.066	0.233	1	0.276	0	3	ppb
CHEMBL3901124	CHEMBL2835	1	0.002	0.023	0.235	0.01	0.029	0.071	0.224	0.018	1	0	1	ppb
CHEMBL3901124	CHEMBL2148	1	0.002	0.025	0.327	0.02	0.047	0.11	0.107	0.021	1	0	2	ppb
CHEMBL3901124	CHEMBL2971	1	0.006	1	1	0.174	0.271	0.147	0.401	0.14	1	0	3	ppb
CHEMBL3901134	CHEMBL2971	1	1	0.906	1	0.894	0.923	1	1	0.803	1	0	5	ppb
CHEMBL3901497	CHEMBL2971	1	0.977	0.966	1	0.964	0.98	1	1	0.712	1	0	2	ppb
CHEMBL3902542	CHEMBL2148	1	0.095	0.073	0.177	0.12	0.153	1	1	0.237	0.216	0	2	ppb
CHEMBL3902579	CHEMBL2835	1	0.06	0.099	1	0.095	0.109	1	0.063	0.085	0.155	0	1	ppb
CHEMBL3903218	CHEMBL2971	1	1	0.892	0.861	0.888	0.928	0.147	1	0.794	1	0	1	ppb
CHEMBL3903272	CHEMBL4860	0	0.037	0	0.063	0	0.001	0.527	0.022	0	0.03	0	2	ppb
CHEMBL3903272	CHEMBL4625	0	0.058	0	0.048	0	0.001	0.573	0.008	0	0.037	0	3	ppb
CHEMBL3903286	CHEMBL2148	1	0.038	0.151	0.177	1	0.201	1	1	0.178	0.343	0	3	ppb
CHEMBL3903560	CHEMBL234	0.014	1	0.025	0.006	0.009	0.019	1	1	1	0.011	0	5	ppb
CHEMBL3903686	CHEMBL2147	0.193	1	0.515	1	0.807	1	1	1	0.928	0.679	0	4	ppb
CHEMBL3903837	CHEMBL4523	1	1	0.578	0.253	1	0.458	1	1	1	0.614	0	8	ppb
CHEMBL3904282	CHEMBL2147	1	1	0.421	1	0.733	0.724	1	1	0.88	0.726	0	5	ppb
CHEMBL3905144	CHEMBL2147	0.052	1	0.685	1	0.818	1	1	1	0.943	1	0	9	ppb
CHEMBL3905194	CHEMBL4523	1	1	0.325	0.166	0.378	0.289	0.042	0.152	1	0.19	0	2	ppb
CHEMBL3905194	CHEMBL2147	1	1	0.447	0.255	0.491	0.4	0.066	0.233	1	0.276	0	3	ppb
CHEMBL3905247	CHEMBL234	1	0.131	0.211	1	0.205	0.226	0.192	0.389	0.431	1	0	6	ppb
CHEMBL3906168	CHEMBL2971	1	0.977	0.974	1	0.965	0.986	1	1	0.868	1	0	2	ppb
CHEMBL3906357	CHEMBL2147	1	1	0.408	0.281	0.696	0.642	1	1	0.877	0.738	0	2	ppb
CHEMBL3906798	CHEMBL2147	1	0.689	0.272	0.391	0.508	0.293	0.066	1	0.666	1	0	3	ppb
CHEMBL3906798	CHEMBL5407	1	1	0.144	0.266	0.364	0.176	0.037	1	0.584	1	0	5	ppb
CHEMBL3906798	CHEMBL4523	1	0.58	0.165	1	0.396	0.192	0.042	1	0.591	1	0	6	ppb
CHEMBL3906885	CHEMBL2148	1	0.053	0.073	0.09	0.127	0.083	1	1	0.117	0.206	0	2	ppb
CHEMBL3907010	CHEMBL3105	1	0.015	0.36	1	0.145	0.322	1	1	0.246	0.01	0	2	ppb
CHEMBL3907320	CHEMBL2147	0.076	1	0.476	0.482	0.643	0.615	0.181	1	1	1	0	1	ppb
CHEMBL3907536	CHEMBL209	0.387	0.877	0.709	0.787	0.775	0.839	1	1	1	1	0	4	ppb
CHEMBL3907732	CHEMBL2147	1	1	1	0.545	1	0.813	0.234	1	1	1	0	10	ppb
CHEMBL3908233	CHEMBL2971	1	0.987	0.985	0.923	0.984	0.987	1	0.685	0.858	1	0	2	ppb
CHEMBL3908328	CHEMBL2971	1	0.959	1	1	0.996	0.998	1	0.963	0.828	1	0	4	ppb
CHEMBL3909091	CHEMBL2971	1	0.983	0.918	0.957	0.909	0.893	1	1	0.78	1	0	2	ppb
CHEMBL3909092	CHEMBL2835	1	0.015	0.005	0.011	0.022	0.015	1	1	0.046	0.005	0	1	ppb
CHEMBL3909568	CHEMBL2971	1	0.999	0.985	0.923	0.99	1	1	1	0.877	1	0	2	ppb
CHEMBL3909785	CHEMBL2147	1	1	0.457	0.398	0.735	0.757	0.483	1	1	0.627	0	1	ppb
CHEMBL3909947	CHEMBL5407	0.003	1	0.506	0.179	0.648	0.405	0.037	1	1	1	0	3	ppb
CHEMBL3909947	CHEMBL2147	0.008	1	0.652	0.279	0.759	0.547	0.066	1	1	1	0	5	ppb
CHEMBL3910228	CHEMBL4822	1	1	0.702	0.442	0.625	0.593	1	1	0.906	1	0	6	ppb
CHEMBL3910228	CHEMBL2525	1	1	1	0.144	0.622	0.504	1	1	0.911	1	0	10	ppb
CHEMBL3911037	CHEMBL1946	0.048	0.208	0.033	0.021	0.038	0.035	0.055	0.032	0.31	1	0	1	ppb
CHEMBL3911037	CHEMBL1945	0.061	0.204	0.042	0.024	0.045	0.041	0.058	0.032	0.333	1	0	2	ppb
CHEMBL3911942	CHEMBL2971	1	0.947	0.961	1	0.949	0.981	1	1	0.808	1	0	4	ppb
CHEMBL3912892	CHEMBL2971	1	1	0.914	1	0.951	0.975	1	1	0.858	0.887	0	2	ppb
CHEMBL3913446	CHEMBL4523	0.512	1	1	1	0.886	0.844	1	1	0.92	1	0	6	ppb
CHEMBL3913446	CHEMBL2147	0.604	1	1	1	0.917	0.884	1	1	0.941	1	0	8	ppb
CHEMBL3913540	CHEMBL2147	1	1	0.577	0.342	0.682	1	0.026	0.638	1	1	0	4	ppb
CHEMBL3913540	CHEMBL4523	1	1	0.463	0.238	0.589	1	0.015	1	1	1	0	10	ppb
CHEMBL3913842	CHEMBL2971	1	0.931	1	1	0.968	1	1	1	0.82	1	0	8	ppb
CHEMBL3914377	CHEMBL2971	1	1	0.99	1	0.994	1	1	1	0.858	0.868	0	2	ppb
CHEMBL3914475	CHEMBL2835	1	0.044	0.602	1	0.309	0.609	1	0.474	0.077	1	0	2	ppb
CHEMBL3914475	CHEMBL2148	1	0.053	0.739	1	0.425	0.733	1	0.61	0.137	1	0	4	ppb
CHEMBL3914639	CHEMBL5407	1	1	0.411	0.186	0.436	0.263	1	1	0.806	1	0	1	ppb
CHEMBL3914639	CHEMBL4523	1	1	0.452	0.194	0.47	0.287	1	1	0.804	1	0	2	ppb
CHEMBL3914639	CHEMBL2147	1	1	0.567	0.289	0.577	0.398	1	1	0.85	1	0	4	ppb
CHEMBL3915865	CHEMBL2971	1	0.991	1	1	0.988	0.991	1	0.795	0.832	1	0	1	ppb
CHEMBL3915913	CHEMBL2147	0.116	0.415	0.259	1	0.425	0.274	0.007	1	0.406	1	0	3	ppb
CHEMBL3915913	CHEMBL5407	0.068	1	0.134	1	0.284	0.161	0.003	1	0.307	1	0	4	ppb
CHEMBL3916122	CHEMBL237	1	0.019	0	0.003	0	0	0.03	0.067	1	0.489	0	6	ppb
CHEMBL3916604	CHEMBL209	1	0.741	0.762	0.819	0.772	0.83	1	1	1	1	0	8	ppb
CHEMBL3916961	CHEMBL1908	1	0	0.005	0.004	0.003	0.003	0.011	1	0.017	1	0	2	ppb
CHEMBL3916961	CHEMBL2722	1	0.001	0.009	0.005	0.005	0.004	0.012	1	0.021	1	0	3	ppb
CHEMBL3917854	CHEMBL2971	1	1	0.928	1	0.934	0.959	0.386	1	0.828	1	0	5	ppb
CHEMBL3917906	CHEMBL2835	1	0.079	0.1	0.173	0.114	0.233	0.098	0.129	1	0.17	0	1	ppb
CHEMBL3917906	CHEMBL2148	1	0.095	0.187	0.248	0.181	0.329	0.197	0.203	1	0.292	0	2	ppb
CHEMBL3918076	CHEMBL4523	1	0.955	1	1	0.796	0.828	0.169	1	1	1	0	8	ppb
CHEMBL3918076	CHEMBL2147	1	0.975	1	1	0.849	0.872	0.234	1	1	1	0	9	ppb
CHEMBL3918755	CHEMBL224	1	1	0.024	0.027	0.02	0.018	1	0.155	1	1	0	9	ppb
CHEMBL3918755	CHEMBL234	1	0.031	0.131	1	0.052	0.09	1	1	1	0.046	0	10	ppb
CHEMBL3919646	CHEMBL4523	0.009	0.209	0.275	0.07	0.23	0.101	0.004	0.077	1	0.153	0	2	ppb
CHEMBL3919646	CHEMBL2147	0.017	0.307	0.396	0.124	0.337	0.18	0.007	0.129	1	0.231	0	3	ppb
CHEMBL3919799	CHEMBL2148	1	0.002	0.002	0.02	0.009	0.011	1	1	0.003	0.002	0	2	ppb
CHEMBL3919848	CHEMBL209	0.323	1	0.597	1	0.672	0.691	1	1	1	1	0	7	ppb
CHEMBL3920142	CHEMBL2971	1	0.865	0.904	1	0.897	0.864	1	1	0.803	1	0	4	ppb
CHEMBL3920252	CHEMBL224	1	0.007	0.001	0.001	0.002	0.001	0.107	0.071	1	1	0	6	ppb
CHEMBL3920252	CHEMBL234	0.134	0	0.038	1	0.009	0.015	0.096	1	1	0.002	0	8	ppb
CHEMBL3920484	CHEMBL2835	1	0.003	0.001	0.004	0.005	0.004	1	1	0.002	0	0	1	ppb
CHEMBL3920484	CHEMBL2148	1	0.003	0.002	0.006	0.01	0.007	1	1	0.005	0	0	2	ppb
CHEMBL3920517	CHEMBL299	1	1	0.837	1	0.85	0.975	1	1	0.87	1	0	2	ppb
CHEMBL3920517	CHEMBL3920	1	1	0.879	1	0.886	0.979	1	1	0.907	1	0	3	ppb
CHEMBL3920581	CHEMBL2148	1	0.001	0.001	0.016	0.004	0.007	1	1	0	0.001	0	3	ppb
CHEMBL3920600	CHEMBL2147	0.179	1	0.589	0.456	0.781	0.757	1	1	0.946	1	0	1	ppb
CHEMBL3920600	CHEMBL4523	0.124	1	1	1	1	1	1	1	0.926	0.84	0	8	ppb
CHEMBL3920627	CHEMBL209	1	0.781	0.64	0.354	0.703	0.684	0.466	0.675	1	1	0	1	ppb
CHEMBL3920681	CHEMBL2835	1	0.003	0.038	1	0.012	0.035	1	1	0.039	1	0	3	ppb
CHEMBL3920681	CHEMBL2148	1	0.003	0.085	1	0.023	0.056	1	1	0.077	1	0	5	ppb
CHEMBL3920824	CHEMBL2971	1	0.987	1	1	0.99	0.995	1	0.795	0.851	1	0	1	ppb
CHEMBL3921976	CHEMBL2014	1	0	0.009	0.002	0.001	0	0.048	0.026	0.052	0.017	0	1	ppb
CHEMBL3921976	CHEMBL233	1	0.003	0.031	0.038	0.006	0.006	0.341	0.095	0.108	1	0	2	ppb
CHEMBL3922782	CHEMBL2971	1	0.983	1	1	0.993	1	1	1	0.858	1	0	10	ppb
CHEMBL3924226	CHEMBL2971	1	0.987	0.963	1	0.949	0.985	1	1	0.861	1	0	1	ppb
CHEMBL3924451	CHEMBL2971	1	0.865	0.914	1	0.905	0.9	1	0.685	0.729	1	0	2	ppb
CHEMBL3924903	CHEMBL5407	1	1	0.382	1	0.622	0.306	1	1	1	1	0	10	ppb
CHEMBL3925605	CHEMBL2148	1	0.005	0.002	0.006	0.012	0.008	1	1	0.008	0	0	2	ppb
CHEMBL3925958	CHEMBL2971	1	1	0.931	1	0.954	0.987	1	1	0.855	0.807	0	1	ppb
CHEMBL3926007	CHEMBL5407	0.012	1	0.435	0.078	0.623	0.319	0.037	1	1	1	0	3	ppb
CHEMBL3926007	CHEMBL4523	0.014	1	0.476	0.077	0.657	0.347	0.042	1	1	1	0	4	ppb
CHEMBL3926007	CHEMBL2147	0.025	1	0.589	0.135	0.738	0.459	0.066	1	1	1	0	5	ppb
CHEMBL3926009	CHEMBL2971	1	0.991	0.896	1	0.945	0.963	1	1	0.858	0.887	0	1	ppb
CHEMBL3926059	CHEMBL2148	1	0.008	0.037	0.095	0.059	0.041	1	1	0.017	0.231	0	2	ppb
CHEMBL3926308	CHEMBL2971	1	0.993	0.995	1	1	1	1	0.963	0.902	1	0	1	ppb
CHEMBL3926930	CHEMBL2148	1	0.008	0.076	0.205	0.109	0.097	0.052	0.107	0.035	0.585	0	1	ppb
CHEMBL3927136	CHEMBL237	0.239	0.008	1	1	1	1	0.366	0.688	0.004	1	0	10	ppb
CHEMBL3927952	CHEMBL5407	0.012	1	0.287	0.152	0.364	0.149	0.037	1	1	1	0	2	ppb
CHEMBL3927952	CHEMBL4523	0.014	1	0.321	0.156	0.396	0.163	0.042	1	1	1	0	3	ppb
CHEMBL3927952	CHEMBL2147	0.025	1	0.443	0.243	0.508	0.259	0.066	1	1	1	0	4	ppb
CHEMBL3928129	CHEMBL2835	1	0.244	0.083	0.326	0.133	0.353	0.098	0.025	1	1	0	3	ppb
CHEMBL3928249	CHEMBL2971	1	0.947	0.989	1	0.967	0.989	1	1	0.682	1	0	2	ppb
CHEMBL3928595	CHEMBL2147	1	1	0.361	0.37	0.707	0.736	1	0.233	0.871	0.675	0	1	ppb
CHEMBL3929168	CHEMBL234	0.134	0	0.007	0.008	0.001	0.001	1	0.144	1	0.002	0	2	ppb
CHEMBL3929168	CHEMBL217	0.182	0	1	0.013	0.001	0.001	1	1	1	0.003	0	7	ppb
CHEMBL3929534	CHEMBL209	1	1	0.396	0.121	0.365	0.303	1	1	1	0.025	0	5	ppb
CHEMBL3929573	CHEMBL2971	1	0.977	0.975	1	0.971	0.978	1	1	0.836	1	0	2	ppb
CHEMBL3930290	CHEMBL2148	1	1	0.133	0.312	0.244	0.157	1	1	0.107	1	0	6	ppb
CHEMBL3930290	CHEMBL2971	1	1	0.223	0.402	0.352	0.232	1	1	0.163	1	0	8	ppb
CHEMBL3930305	CHEMBL2835	1	0.165	0.154	0.291	0.179	0.375	1	0.129	1	0.441	0	2	ppb
CHEMBL3930515	CHEMBL1908	1	0	0.009	1	0.002	0.006	1	1	0.006	1	0	5	ppb
CHEMBL3930515	CHEMBL2722	1	0	0.014	1	0.004	0.008	1	1	0.007	1	0	6	ppb
CHEMBL3930620	CHEMBL203	1	0.412	0.326	1	0.277	0.251	0.123	1	0.436	0.491	0	2	ppb
CHEMBL3930620	CHEMBL325	1	0.058	0.421	0.251	0.338	0.349	1	1	1	0.434	0	4	ppb
CHEMBL3930712	CHEMBL2835	1	0.032	0.192	1	0.078	0.234	1	1	0.054	1	0	4	ppb
CHEMBL3930712	CHEMBL2148	1	0.038	0.315	1	0.13	0.33	1	1	0.102	1	0	6	ppb
CHEMBL3931278	CHEMBL2971	1	0.947	0.984	0.878	0.98	0.984	1	0.685	0.836	1	0	1	ppb
CHEMBL3932186	CHEMBL234	1	1	0.05	0.008	0.048	0.047	1	0.144	1	0.003	0	5	ppb
CHEMBL3932186	CHEMBL224	1	1	0.066	0.025	0.124	0.068	1	1	1	0.05	0	10	ppb
CHEMBL3932623	CHEMBL2971	1	0.947	1	1	0.992	1	1	1	0.836	1	0	10	ppb
CHEMBL3932881	CHEMBL2971	1	0.983	1	1	0.969	0.987	1	1	0.84	1	0	4	ppb
CHEMBL3933719	CHEMBL2147	1	1	0.664	0.376	0.866	0.848	1	0.363	1	0.562	0	1	ppb
CHEMBL3933766	CHEMBL2971	1	0.998	1	1	0.994	1	1	1	0.855	1	0	9	ppb
CHEMBL3934335	CHEMBL2971	1	1	0.906	0.871	0.931	0.938	0.386	1	0.84	0.884	0	1	ppb
CHEMBL3935018	CHEMBL5407	0.06	1	0.431	0.316	0.4	0.208	1	1	0.635	1	0	3	ppb
CHEMBL3935018	CHEMBL4523	0.068	1	0.473	0.336	0.434	0.227	1	1	0.64	1	0	4	ppb
CHEMBL3935018	CHEMBL2147	0.105	1	0.586	0.45	0.544	0.333	1	1	0.71	1	0	5	ppb
CHEMBL3935096	CHEMBL5407	1	0.45	0.225	1	0.177	0.096	0.013	1	0.569	1	0	4	ppb
CHEMBL3935096	CHEMBL4523	1	0.467	0.255	1	0.199	0.104	0.015	1	0.576	1	0	5	ppb
CHEMBL3935096	CHEMBL2147	1	0.584	0.375	1	0.302	0.184	0.026	1	0.653	1	0	6	ppb
CHEMBL3935396	CHEMBL2971	1	0.959	0.971	1	0.95	0.962	1	0.685	0.832	1	0	1	ppb
CHEMBL3936541	CHEMBL2971	1	1	0.971	1	0.983	1	1	0.795	0.877	1	0	2	ppb
CHEMBL3936992	CHEMBL4523	1	1	0.623	0.243	0.775	0.65	1	1	1	0.526	0	7	ppb
CHEMBL3936992	CHEMBL2147	1	1	0.714	0.348	0.833	0.731	1	1	1	0.513	0	10	ppb
CHEMBL3937204	CHEMBL2148	1	0.012	0.144	0.29	0.176	0.145	0.052	0.107	0.035	1	0	1	ppb
CHEMBL3937222	CHEMBL209	0.323	0.817	0.287	0.312	0.452	0.498	1	1	1	1	0	3	ppb
CHEMBL3937835	CHEMBL2835	1	0.022	0.039	0.108	0.08	0.055	1	1	0.005	1	0	3	ppb
CHEMBL3937835	CHEMBL2148	1	0.027	0.085	0.16	0.132	0.086	1	1	0.012	1	0	4	ppb
CHEMBL3937878	CHEMBL2971	1	1	0.948	0.838	0.935	0.964	0.105	0.685	0.808	1	0	1	ppb
CHEMBL3937927	CHEMBL2971	1	0.995	0.988	1	0.993	1	1	0.795	0.871	1	0	1	ppb
CHEMBL3938210	CHEMBL234	0.009	0.031	0.059	0.036	0.022	0.024	1	0.254	1	0.043	0	2	ppb
CHEMBL3938210	CHEMBL224	1	1	0.07	0.096	0.045	0.029	1	0.275	1	1	0	9	ppb
CHEMBL3938660	CHEMBL2971	1	1	0.9	1	0.941	0.969	1	1	0.883	1	0	7	ppb
CHEMBL3938720	CHEMBL2971	1	0.947	1	1	0.967	0.99	1	1	0.88	1	0	6	ppb
CHEMBL3939580	CHEMBL2835	1	1	0.843	0.751	0.91	0.854	0.635	1	1	1	0	2	ppb
CHEMBL3939580	CHEMBL2148	1	1	0.917	0.852	0.954	0.925	1	1	1	1	0	7	ppb
CHEMBL3939892	CHEMBL2971	1	0.959	0.983	1	0.977	0.988	1	1	0.82	1	0	4	ppb
CHEMBL3940389	CHEMBL4523	1	1	0.701	1	0.716	0.717	0.127	1	1	1	0	2	ppb
CHEMBL3940389	CHEMBL2147	1	1	0.777	1	0.786	0.785	0.181	1	1	1	0	3	ppb
CHEMBL3940712	CHEMBL224	1	1	0.012	0.053	0.011	0.018	1	0.275	1	1	0	10	ppb
CHEMBL3940744	CHEMBL5407	1	0.894	0.443	0.229	0.447	0.248	1	1	0.782	1	0	2	ppb
CHEMBL3940744	CHEMBL4523	1	0.903	0.485	0.241	0.481	0.271	1	1	0.78	1	0	3	ppb
CHEMBL3940744	CHEMBL2147	1	0.942	0.597	0.345	0.588	0.381	1	1	0.83	1	0	4	ppb
CHEMBL3940929	CHEMBL2971	1	0.977	0.971	1	0.959	0.983	1	1	0.836	1	0	2	ppb
CHEMBL3941211	CHEMBL2148	1	0.008	0.014	0.071	0.035	0.032	1	1	0.001	0.141	0	2	ppb
CHEMBL3942619	CHEMBL262	1	1	0.741	0.664	0.765	0.602	1	1	0.79	1	0	6	ppb
CHEMBL3943096	CHEMBL209	0.623	0.938	0.736	0.506	0.699	0.841	0.529	0.851	1	0.309	0	2	ppb
CHEMBL3943759	CHEMBL5407	0.032	0.45	0.229	1	0.181	0.098	1	1	0.569	1	0	5	ppb
CHEMBL3943759	CHEMBL2147	0.06	0.584	0.379	1	0.307	0.187	1	1	0.653	1	0	6	ppb
CHEMBL3944136	CHEMBL2147	1	1	0.654	0.378	0.849	0.818	1	1	1	0.549	0	2	ppb
CHEMBL3945832	CHEMBL2973	1	1	0.161	0.028	0.236	0.086	0.015	0.048	1	1	0	2	ppb
CHEMBL3945832	CHEMBL3231	1	1	0.152	0.027	0.228	0.081	0.013	0.186	1	1	0	3	ppb
CHEMBL3945908	CHEMBL2971	1	1	1	0.533	1	0.572	0.147	0.549	0.124	1	0	4	ppb
CHEMBL3946995	CHEMBL234	0.009	0	0.027	0.005	0.01	0.01	1	0.144	1	0.001	0	2	ppb
CHEMBL3946995	CHEMBL224	1	0.007	0.023	0.011	0.022	0.012	1	1	1	0.064	0	9	ppb
CHEMBL3947292	CHEMBL2971	1	1	1	0.409	1	0.801	0.319	1	1	1	0	10	ppb
CHEMBL3947456	CHEMBL2971	1	0.947	0.972	1	0.958	0.982	1	1	0.855	1	0	1	ppb
CHEMBL3948056	CHEMBL224	1	0.211	0.103	0.219	0.077	0.135	1	1	0.011	0.184	0	7	ppb
CHEMBL3949102	CHEMBL2147	1	1	0.743	0.557	0.89	0.857	1	0.363	1	0.645	0	1	ppb
CHEMBL3949136	CHEMBL2973	1	1	0.324	0.085	0.628	0.405	0.097	0.004	1	1	0	2	ppb
CHEMBL3949136	CHEMBL3231	1	1	1	0.213	0.615	0.389	1	0.004	1	1	0	8	ppb
CHEMBL3949274	CHEMBL5407	0.036	1	0.299	1	0.411	0.175	0.037	1	1	1	0	2	ppb
CHEMBL3949274	CHEMBL4523	0.042	1	0.335	1	0.444	0.191	0.042	1	1	1	0	3	ppb
CHEMBL3949274	CHEMBL2147	0.067	1	0.457	1	0.554	0.292	0.066	1	1	1	0	5	ppb
CHEMBL3949394	CHEMBL2971	1	1	1	1	0.999	1	1	1	0.858	1	0	10	ppb
CHEMBL3950269	CHEMBL5407	1	1	0.287	0.119	0.352	0.143	0.037	1	0.708	1	0	2	ppb
CHEMBL3950269	CHEMBL2147	1	1	0.444	0.196	0.497	0.251	0.066	1	0.771	1	0	4	ppb
CHEMBL3950981	CHEMBL2971	1	0.991	1	1	0.994	0.996	1	0.795	0.868	1	0	2	ppb
CHEMBL3951001	CHEMBL209	1	0.741	0.762	0.819	0.772	0.83	1	1	1	1	0	8	ppb
CHEMBL3951178	CHEMBL2835	1	0.022	0.024	0.163	0.052	0.092	1	0.129	0.005	1	0	1	ppb
CHEMBL3951178	CHEMBL2971	1	1	0.115	0.389	0.16	0.212	1	0.26	1	1	0	5	ppb
CHEMBL3951198	CHEMBL209	1	1	0.384	0.235	0.607	0.554	0.101	1	1	1	0	7	ppb
CHEMBL3951623	CHEMBL2148	1	0.449	1	0.177	1	1	1	0.203	0.326	1	0	7	ppb
CHEMBL3951741	CHEMBL2147	1	1	0.439	0.574	0.539	0.495	1	1	0.508	1	0	4	ppb
CHEMBL3951741	CHEMBL5407	1	1	0.283	1	0.395	0.353	1	1	0.41	1	0	6	ppb
CHEMBL3952360	CHEMBL5407	0.012	1	0.53	1	0.608	0.369	1	0.37	0.726	1	0	2	ppb
CHEMBL3952360	CHEMBL2147	0.025	1	0.672	1	0.726	0.511	1	0.504	0.786	1	0	3	ppb
CHEMBL3952555	CHEMBL2148	1	0	1	1	0.077	0.125	1	1	0.001	0.362	0	4	ppb
CHEMBL3953164	CHEMBL5407	0.06	0.616	0.264	0.13	0.233	0.086	0.037	1	0.628	1	0	1	ppb
CHEMBL3953164	CHEMBL4523	0.068	0.634	0.296	0.133	0.258	0.093	0.042	1	0.633	1	0	2	ppb
CHEMBL3953164	CHEMBL2147	0.105	0.736	0.418	0.212	0.369	0.169	0.066	1	0.704	1	0	3	ppb
CHEMBL3954558	CHEMBL2148	1	1	0	0.015	0	0.001	1	0.046	0.014	0.001	0	3	ppb
CHEMBL3954558	CHEMBL2971	1	1	0	0.03	0.001	0.004	1	0.066	0.027	0.005	0	4	ppb
CHEMBL3954782	CHEMBL236	0.558	0.007	0.06	1	0.025	0.031	1	1	0.006	1	0	8	ppb
CHEMBL3955757	CHEMBL2148	1	1	0.001	0.129	1	0.014	1	0.203	0	0.023	0	3	ppb
CHEMBL3956075	CHEMBL2971	1	0.959	1	1	0.987	0.991	1	0.795	0.828	1	0	2	ppb
CHEMBL3956529	CHEMBL2835	1	0.032	1	1	0.236	0.202	1	1	0.018	1	0	7	ppb
CHEMBL3956720	CHEMBL234	0.001	0.001	0.033	0.006	0.005	0.005	0.192	1	1	0.002	0	2	ppb
CHEMBL3957073	CHEMBL2147	1	1	0.375	0.24	0.686	0.644	1	1	1	0.584	0	2	ppb
CHEMBL3957106	CHEMBL209	1	0.963	0.83	1	0.85	0.889	1	1	1	0.423	0	4	ppb
CHEMBL3957231	CHEMBL2971	1	0.865	0.898	0.883	0.882	0.849	1	1	0.682	1	0	2	ppb
CHEMBL3957954	CHEMBL2147	0.207	1	0.337	0.236	0.661	0.623	1	1	0.871	0.698	0	1	ppb
CHEMBL3957954	CHEMBL4523	0.147	1	1	1	1	0.583	1	1	0.83	1	0	10	ppb
CHEMBL3957997	CHEMBL5407	1	1	0.26	0.207	0.333	0.176	1	0.37	1	1	0	3	ppb
CHEMBL3957997	CHEMBL2147	1	1	0.414	0.317	0.478	0.294	1	0.504	1	1	0	5	ppb
CHEMBL3958253	CHEMBL2147	0.001	0.584	1	1	0.558	0.42	0.007	0.233	1	1	0	2	ppb
CHEMBL3958253	CHEMBL5407	0.001	0.668	1	1	0.474	0.282	0.003	1	1	1	0	4	ppb
CHEMBL3958307	CHEMBL2147	1	1	0.49	1	0.803	0.817	1	1	0.867	0.736	0	4	ppb
CHEMBL3958969	CHEMBL280	1	0.032	0.407	0.444	0.268	0.441	0.283	1	0.248	1	0	3	ppb
CHEMBL3958969	CHEMBL333	1	0.094	0.658	0.496	0.514	0.743	0.266	1	0.327	1	0	4	ppb
CHEMBL3959091	CHEMBL2147	0.127	1	0.259	1	0.604	0.462	0.181	1	0.66	1	0	3	ppb
CHEMBL3959091	CHEMBL5407	1	1	0.134	1	0.465	0.322	0.116	1	0.577	1	0	6	ppb
CHEMBL3959091	CHEMBL4523	1	1	0.155	1	0.5	0.35	0.127	1	0.584	1	0	7	ppb
CHEMBL3959358	CHEMBL2835	1	0.015	0.003	0.021	0.016	0.017	1	1	0.009	0	0	1	ppb
CHEMBL3959398	CHEMBL233	0	0	0	0	0	0	0	0	0	0	1	6	ppb
CHEMBL3959433	CHEMBL2971	1	1	1	0.409	1	0.801	0.319	1	1	1	0	10	ppb
CHEMBL3959770	CHEMBL2835	1	0.004	0.001	0.004	0.006	0.005	1	1	0.003	0	0	1	ppb
CHEMBL3959909	CHEMBL2835	1	1	0.001	0.014	0.031	0.032	1	1	0.025	0.002	0	1	ppb
CHEMBL3959924	CHEMBL2971	1	0.997	0.983	1	0.989	1	1	0.876	0.847	1	0	1	ppb
CHEMBL3960213	CHEMBL2148	1	0.095	0.006	0.011	0.037	0.016	1	1	0.056	0.024	0	7	ppb
CHEMBL3960213	CHEMBL2971	1	1	0.019	0.023	0.077	0.034	1	1	0.087	0.057	0	10	ppb
CHEMBL3960416	CHEMBL2148	1	0.008	0	0.001	0.005	0.003	1	1	0.02	0	0	3	ppb
CHEMBL3960785	CHEMBL224	0.277	0.002	1	1	0.008	0.016	1	0.275	1	0.056	0	9	ppb
CHEMBL3961360	CHEMBL5407	1	1	0.357	1	0.481	0.546	1	1	0.771	1	0	3	ppb
CHEMBL3961360	CHEMBL2147	1	1	0.516	1	0.619	0.677	1	1	0.822	1	0	6	ppb
CHEMBL3961670	CHEMBL2835	1	0.002	0.002	1	0.001	0.007	1	1	0	0.105	0	4	ppb
CHEMBL3961692	CHEMBL5407	1	1	0.182	1	0.306	0.198	0.155	1	0.402	1	0	3	ppb
CHEMBL3961692	CHEMBL2147	1	1	0.322	1	0.449	0.321	0.234	1	0.501	1	0	4	ppb
CHEMBL3961850	CHEMBL2148	1	0.027	0.048	0.09	0.093	0.062	1	1	0.023	0.338	0	2	ppb
CHEMBL3962342	CHEMBL2971	1	0.991	0.957	1	0.958	0.968	1	1	0.855	1	0	7	ppb
CHEMBL3962525	CHEMBL234	0.014	0.014	0.027	0.015	0.008	0.022	0.022	1	1	0.001	0	1	ppb
CHEMBL3962525	CHEMBL224	1	0.007	1	1	1	0.021	0.025	0.155	1	0.058	0	10	ppb
CHEMBL3963191	CHEMBL2971	1	0.995	0.988	1	0.989	0.996	1	1	0.832	1	0	4	ppb
CHEMBL3963271	CHEMBL2971	1	0.947	0.953	1	0.939	0.964	1	1	0.836	1	0	4	ppb
CHEMBL3964279	CHEMBL2971	1	1	0.923	1	0.966	0.984	1	1	0.886	1	0	3	ppb
CHEMBL3964367	CHEMBL2147	1	1	0.636	0.335	0.86	0.828	1	0.233	1	0.631	0	1	ppb
CHEMBL3964990	CHEMBL2971	1	0.991	1	1	0.975	0.993	1	1	0.844	1	0	3	ppb
CHEMBL3965297	CHEMBL4523	0.184	0.356	0.192	0.142	0.141	0.145	0.271	0.152	1	0.046	0	2	ppb
CHEMBL3965297	CHEMBL2147	0.253	0.472	0.305	0.224	0.233	0.236	0.354	0.233	1	0.084	0	3	ppb
CHEMBL3965643	CHEMBL2147	1	1	0.343	0.289	0.665	0.6	1	1	0.864	0.645	0	2	ppb
CHEMBL3965713	CHEMBL2835	1	0.079	0.106	0.13	0.208	0.147	0.071	0.129	0.077	0.556	0	1	ppb
CHEMBL3965713	CHEMBL2971	1	1	0.301	0.266	0.418	0.304	0.147	0.26	1	1	0	3	ppb
CHEMBL3965757	CHEMBL4523	1	1	0.325	0.166	0.353	0.27	0.042	0.152	1	0.19	0	2	ppb
CHEMBL3965757	CHEMBL2147	1	1	0.447	0.255	0.467	0.38	0.066	0.233	1	0.276	0	3	ppb
CHEMBL3965809	CHEMBL2971	1	0.835	1	1	0.95	0.993	1	1	0.836	1	0	5	ppb
CHEMBL3965946	CHEMBL4523	0.301	1	0.308	0.132	0.364	0.261	0.042	0.077	1	0.175	0	2	ppb
CHEMBL3965946	CHEMBL2147	0.387	1	0.43	0.211	0.477	0.37	0.066	0.129	1	0.259	0	3	ppb
CHEMBL3966363	CHEMBL2147	1	1	0.361	0.37	0.707	0.736	1	0.233	0.871	0.675	0	1	ppb
CHEMBL3966643	CHEMBL3920	1	0.728	0.944	1	0.925	0.975	1	1	0.912	0.829	0	1	ppb
CHEMBL3966643	CHEMBL299	1	1	0.92	1	0.9	0.97	1	1	0.876	1	0	7	ppb
CHEMBL3966696	CHEMBL5407	1	0.394	0.222	0.205	0.167	0.09	0.013	1	1	1	0	3	ppb
CHEMBL3966696	CHEMBL2147	1	0.529	0.37	0.314	0.289	0.175	0.026	1	1	1	0	4	ppb
CHEMBL3966732	CHEMBL4523	0.184	0.356	0.192	0.142	0.141	0.145	0.271	0.152	1	0.046	0	2	ppb
CHEMBL3966732	CHEMBL2147	0.253	0.472	0.305	0.224	0.233	0.236	0.354	0.233	1	0.084	0	3	ppb
CHEMBL3966806	CHEMBL4282	1	0.934	0.701	1	0.839	1	0.431	1	1	1	0	7	ppb
CHEMBL3966830	CHEMBL237	0.532	1	1	0.276	1	1	1	0.263	0.286	0.607	0	6	ppb
CHEMBL3966842	CHEMBL224	1	0.083	0.072	0.274	0.037	0.082	0.421	1	0.001	0.237	0	3	ppb
CHEMBL3966842	CHEMBL217	1	0.065	0.087	1	0.043	0.085	0.47	1	0.001	1	0	7	ppb
CHEMBL3968315	CHEMBL2971	1	0.947	1	1	0.965	0.97	1	1	0.9	1	0	5	ppb
CHEMBL3968781	CHEMBL2971	1	0.969	1	1	0.974	0.975	1	1	0.851	1	0	5	ppb
CHEMBL3968925	CHEMBL4005	0.447	0	0	0.092	0	0	1	0.555	0	0.007	0	1	ppb
CHEMBL3968925	CHEMBL3267	0.436	0.057	0.002	0.437	0.001	0.016	1	1	0.001	0.017	0	4	ppb
CHEMBL3969155	CHEMBL237	0.09	1	1	0.58	1	1	0.44	0.405	0.007	0.789	0	10	ppb
CHEMBL3969253	CHEMBL2971	1	1	0.983	1	0.978	1	1	0.685	0.832	1	0	10	ppb
CHEMBL3971083	CHEMBL2971	1	0.913	0.835	0.9	0.845	0.853	0.522	1	0.828	1	0	1	ppb
CHEMBL3971342	CHEMBL2147	1	1	0.608	0.335	0.848	0.817	1	0.233	1	0.631	0	1	ppb
CHEMBL3971907	CHEMBL224	1	1	1	0.068	0.026	0.048	0.013	0.155	1	0.048	0	5	ppb
CHEMBL3972612	CHEMBL2971	1	0.977	1	1	0.988	1	1	1	0.844	1	0	10	ppb
CHEMBL3973487	CHEMBL234	1	0	0.009	0.003	0.001	0.001	1	0.144	1	0.004	0	3	ppb
CHEMBL3973848	CHEMBL2148	1	0.072	0.085	0.127	0.148	0.125	1	1	0.203	0.165	0	3	ppb
CHEMBL3974543	CHEMBL2147	1	1	0.446	0.281	0.7	0.656	1	1	1	0.567	0	2	ppb
CHEMBL3974857	CHEMBL237	0.207	1	0	0.028	0	0.001	0.44	0.023	1	0.162	0	9	ppb
CHEMBL3974857	CHEMBL233	0.127	1	0	0.022	0	0.001	1	0.013	1	0.124	0	10	ppb
CHEMBL3975198	CHEMBL5407	1	1	0.287	0.119	0.352	0.143	0.037	1	0.708	1	0	2	ppb
CHEMBL3975198	CHEMBL2147	1	1	0.444	0.196	0.497	0.251	0.066	1	0.771	1	0	4	ppb
CHEMBL3975506	CHEMBL2971	1	0.997	0.98	1	0.985	0.996	1	1	0.824	1	0	3	ppb
CHEMBL3975756	CHEMBL2147	1	1	0.505	0.562	0.627	0.594	1	1	0.619	1	0	4	ppb
CHEMBL3975756	CHEMBL5407	1	1	0.346	1	0.491	0.454	1	1	0.531	1	0	7	ppb
CHEMBL3975787	CHEMBL2147	0.029	1	1	0.345	0.768	0.629	0.135	1	1	1	0	6	ppb
CHEMBL3976267	CHEMBL5407	0.042	1	0.287	0.152	0.352	0.143	0.037	1	1	1	0	2	ppb
CHEMBL3976267	CHEMBL4523	0.048	1	0.321	0.156	0.384	0.156	0.042	1	1	1	0	3	ppb
CHEMBL3976267	CHEMBL2147	0.076	1	0.443	0.243	0.496	0.25	0.066	1	1	1	0	4	ppb
CHEMBL3976282	CHEMBL234	0.009	0	0.004	0.005	0	0	1	0.144	0.241	0.002	0	2	ppb
CHEMBL3976282	CHEMBL217	0.015	0	0.004	1	0	0	0.251	1	1	0.003	0	6	ppb
CHEMBL3976282	CHEMBL224	1	1	0.017	0.01	0.014	0.008	0.21	1	1	0.054	0	9	ppb
CHEMBL3977237	CHEMBL2971	1	0.987	0.942	1	0.919	0.951	1	0.685	0.816	1	0	2	ppb
CHEMBL3977509	CHEMBL2148	1	0.012	0.008	0.028	0.027	0.021	1	1	0.018	0.027	0	2	ppb
CHEMBL3979182	CHEMBL2147	1	1	0.73	0.483	0.877	0.857	1	0.504	1	0.574	0	1	ppb
CHEMBL3979537	CHEMBL2971	1	1	0.992	1	0.998	1	1	0.685	0.886	1	0	1	ppb
CHEMBL3980040	CHEMBL2147	1	1	1	0.179	0.607	0.463	0.181	1	1	1	0	5	ppb
CHEMBL3981057	CHEMBL1946	1	0.296	0.12	0.069	0.125	0.127	0.055	0.077	0.441	1	0	1	ppb
CHEMBL3981057	CHEMBL1945	1	0.293	0.142	0.078	0.143	0.141	0.058	0.079	0.467	1	0	2	ppb
CHEMBL3981144	CHEMBL2971	1	0.991	1	1	0.994	1	1	1	0.865	0.901	0	9	ppb
CHEMBL3982255	CHEMBL2148	1	1	0.208	0.165	0.326	0.212	0.052	1	0.107	1	0	3	ppb
CHEMBL3982255	CHEMBL2971	1	1	0.315	0.236	0.441	0.297	0.071	1	1	1	0	6	ppb
CHEMBL3982408	CHEMBL2971	1	0.995	1	1	0.972	0.987	1	1	0.871	1	0	5	ppb
CHEMBL3982418	CHEMBL1908	1	0	0.009	1	0.011	0.014	1	1	0.163	1	0	8	ppb
CHEMBL3982418	CHEMBL2722	1	0.001	0.014	1	0.017	0.017	1	1	0.179	1	0	9	ppb
CHEMBL3982486	CHEMBL234	0.014	0.043	0.047	0.012	0.019	0.03	1	1	1	0.001	0	4	ppb
CHEMBL3982539	CHEMBL5407	0.06	0.716	0.407	0.198	0.358	0.146	0.037	1	0.702	1	0	1	ppb
CHEMBL3982539	CHEMBL4523	0.068	0.732	0.447	0.206	0.39	0.159	0.042	1	0.704	1	0	2	ppb
CHEMBL3982539	CHEMBL2147	0.105	0.817	0.563	0.305	0.503	0.255	0.066	1	0.766	1	0	3	ppb
CHEMBL3983040	CHEMBL2835	1	0.165	0.041	0.257	0.077	0.271	0.071	0.063	1	0.057	0	2	ppb
CHEMBL3983983	CHEMBL2971	1	0.977	1	1	0.991	0.994	1	0.685	0.861	1	0	2	ppb
CHEMBL3984741	CHEMBL2971	1	0.999	0.983	1	0.99	1	1	0.876	0.851	1	0	2	ppb
CHEMBL3984764	CHEMBL2148	1	0.018	0.002	0.039	0.026	0.04	1	1	0.025	0.006	0	2	ppb

[truncated: 2 more sheets: TargetNet, Our model]
